# Supplementary material
Source: publisher figshare collection journal article supplement (https://acs.figshare.com/ndownloader/files/4554895)
Supplement: Supplementary file 1 [file 4554895]

## **- Supplementary Information -**

### **Mapping Adverse Drug Reactions in Chemical Space**

*Josef Scheiber<sup>1,#,\*</sup>, Jeremy L. Jenkins<sup>1</sup>, Sai Chetan K. Sukuru<sup>1</sup>, Andreas Bender<sup>1,+</sup>, Dmitri Mikhailov<sup>1</sup>, Mariusz Milik<sup>1</sup>, Kamal Azzaoui<sup>4</sup>, Steven Whitebread<sup>2</sup>, Jacques Hamon<sup>3</sup>, Laszlo Urban<sup>2</sup>, Meir Glick<sup>1</sup> and John W. Davies<sup>1</sup>*

*1) Lead Discovery Informatics, CPC, Novartis Institutes for Biomedical Research, 250 Massachusetts Avenue, Cambridge/MA, 02139*

*2) Preclinical Safety Profiling, CPC, Novartis Institutes for Biomedical Research, 250 Massachusetts Avenue, Cambridge/MA, 02139*

*3) Preclinical Safety Profiling, CPC, Novartis Pharma AG, Forum 1, 4002 Basel, Switzerland*

*4) Molecular Libraries Informatics, CPC, Novartis Pharma AG, Forum 1, 4002 Basel, Switzerland*

*\* Corresponding Author E-Mail: [mail@josef-scheiber.de](mailto:mail@josef-scheiber.de) Phone: +41 (61) 324 8407*

*#) current address: Text Mining Services, NITAS, Novartis Pharma AG, Forum 1, 4002 Basel, Switzerland*

*+) current address: Leiden / Amsterdam Center for Drug Research, Medicinal Chemistry Division, Einsteinweg 55, 2333 CC Leiden, The Netherlands*

| Basis data for network                                              |                                 |       |                                           |                                                                     |
|---------------------------------------------------------------------|---------------------------------|-------|-------------------------------------------|---------------------------------------------------------------------|
| SOC1                                                                | AE1                             | score | AE2                                       | SOC2                                                                |
| Vascular disorders                                                  | Peripheral circulatory failure  | 1     | Electrocardiogram PR interval             | Investigations                                                      |
| Musculoskeletal and connective tissue disorders                     | Lumbar spinal stenosis          | 1     | Meningioma                                | Neoplasms benign, malignant and unspecified (incl cysts and polyps) |
| Musculoskeletal and connective tissue disorders                     | Dwarfism                        | 1     | Anal atresia                              | Congenital, familial and genetic disorders                          |
| Congenital, familial and genetic disorders                          | Anal atresia                    | 1     | Malignant hydatidiform mole               | Neoplasms benign, malignant and unspecified (incl cysts and polyps) |
| Psychiatric disorders                                               | Suspiciousness                  | 1     | Blood creatine phosphokinase MB increased | Investigations                                                      |
| Investigations                                                      | Urine bilirubin increased       | 1     | Metastases to liver                       | Neoplasms benign, malignant and unspecified (incl cysts and polyps) |
| Congenital, familial and genetic disorders                          | Meningocele                     | 1     | Chondrodystrophy                          | Congenital, familial and genetic disorders                          |
| Eye disorders                                                       | Scleromalacia                   | 1     | Scoliosis                                 | Musculoskeletal and connective tissue disorders                     |
| Nervous system disorders                                            | Sudden onset of sleep           | 1     | Sensation of foreign body                 | General disorders and administration site conditions                |
| Neoplasms benign, malignant and unspecified (incl cysts and polyps) | Glioblastoma multiforme         | 1     | Acquired tracheo-oesophageal fistula      | Respiratory, thoracic and mediastinal disorders                     |
| Psychiatric disorders                                               | Orgasmic sensation decreased    | 1     | Obsessive thoughts                        | Psychiatric disorders                                               |
| Eye disorders                                                       | Eyelid irritation               | 1     | Trichiasis                                | Eye disorders                                                       |
| Investigations                                                      | Capillary fragility increased   | 1     | Muscle contracture                        | Musculoskeletal and connective tissue disorders                     |
| Injury, poisoning and procedural complications                      | Cartilage injury                | 1     | Tonsillar disorder                        | Respiratory, thoracic and mediastinal disorders                     |
| Neoplasms benign, malignant and unspecified (incl cysts and polyps) | Gastrointestinal stromal tumour | 1     | Migraine with aura                        | Nervous system disorders                                            |
| Skin and subcutaneous tissue disorders                              | Skin dystrophy                  | 1     | Keratoacanthoma                           | Neoplasms benign, malignant and unspecified (incl cysts and polyps) |
| Investigations                                                      | Electrocardiogram normal        | 1     | Antiphospholipid antibodies               | Investigations                                                      |
| Musculoskeletal and connective tissue disorders                     | Muscle contracture              | 1     | Diabetic retinopathy                      | Eye disorders                                                       |
| Infections and infestations                                         | Pseudomonal sepsis              | 1     | Bacterial sepsis                          | Infections and infestations                                         |
| Respiratory, thoracic and mediastinal disorders                     | Retinoic acid syndrome          | 1     | Lower respiratory tract inflammation      | Respiratory, thoracic and mediastinal disorders                     |

| Basis data for network                                              |                                           |       |                                         |                                                                     |
|---------------------------------------------------------------------|-------------------------------------------|-------|-----------------------------------------|---------------------------------------------------------------------|
| SOC1                                                                | AE1                                       | score | AE2                                     | SOC2                                                                |
| Neoplasms benign, malignant and unspecified (incl cysts and polyps) | Metastatic neoplasm                       | 1     | HIV infection                           | Infections and infestations                                         |
| Investigations                                                      | Prostatic specific antigen decreased      | 1     | Congenital genital malformation male    | Congenital, familial and genetic disorders                          |
| Neoplasms benign, malignant and unspecified (incl cysts and polyps) | Hepatoblastoma                            | 1     | Acquired tracheo-oesophageal fistula    | Respiratory, thoracic and mediastinal disorders                     |
| Congenital, familial and genetic disorders                          | Moebius II syndrome                       | 1     | Foetal cerebrovascular disorder         | Nervous system disorders                                            |
| Neoplasms benign, malignant and unspecified (incl cysts and polyps) | Neurofibroma                              | 1     | Bowen's disease                         | Neoplasms benign, malignant and unspecified (incl cysts and polyps) |
| Infections and infestations                                         | HIV infection                             | 1     | Hepatic enzyme                          | Investigations                                                      |
| Neoplasms benign, malignant and unspecified (incl cysts and polyps) | Choriocarcinoma                           | 1     | Pituitary tumour                        | Neoplasms benign, malignant and unspecified (incl cysts and polyps) |
| Infections and infestations                                         | Scrotal infection                         | 1     | Ovarian atrophy                         | Reproductive system and breast disorders                            |
| Psychiatric disorders                                               | Suspiciousness                            | 1     | Mendelson's syndrome                    | Respiratory, thoracic and mediastinal disorders                     |
| Cardiac disorders                                                   | Acute left ventricular failure            | 1     | Cerebrospinal fluid rhinorrhoea         | Nervous system disorders                                            |
| Nervous system disorders                                            | Kernicterus                               | 1     | Maximal voluntary ventilation decreased | Investigations                                                      |
| General disorders and administration site conditions                | Infusion related reaction                 | 1     | Bacterial sepsis                        | Infections and infestations                                         |
| Infections and infestations                                         | Eczema infected                           | 1     | Fungal oesophagitis                     | Infections and infestations                                         |
| Nervous system disorders                                            | Atonic seizures                           | 1     | Urinary tract pain                      | Renal and urinary disorders                                         |
| Investigations                                                      | Blood creatine phosphokinase MB increased | 1     | Hallucination, tactile                  | Psychiatric disorders                                               |
| Neoplasms benign, malignant and unspecified (incl cysts and polyps) | Hepatoblastoma                            | 1     | Glioblastoma multiforme                 | Neoplasms benign, malignant and unspecified (incl cysts and polyps) |
| Infections and infestations                                         | Pseudomonal sepsis                        | 1     | Infusion related reaction               | General disorders and administration site conditions                |
| Infections and infestations                                         | Sweat gland infection                     | 1     | Keratosis follicular                    | Congenital, familial and genetic disorders                          |
| Injury, poisoning and procedural complications                      | Wrist fracture                            | 1     | Median nerve lesion                     | Nervous system disorders                                            |
| Neoplasms benign, malignant and unspecified (incl cysts and polyps) | Keratoacanthoma                           | 1     | Bowen's disease                         | Neoplasms benign, malignant and unspecified (incl cysts and polyps) |

| Basis data for network                                              |                                      |       |                                             |                                                                     |
|---------------------------------------------------------------------|--------------------------------------|-------|---------------------------------------------|---------------------------------------------------------------------|
| SOC1                                                                | AE1                                  | score | AE2                                         | SOC2                                                                |
| Gastrointestinal disorders                                          | Necrotising enterocolitis neonatal   | 1     | Renal infarct                               | Renal and urinary disorders                                         |
| Respiratory, thoracic and mediastinal disorders                     | Sputum retention                     | 1     | Nasal necrosis                              | Respiratory, thoracic and mediastinal disorders                     |
| Investigations                                                      | Electrocardiogram U-wave abnormality | 1     | Electrocardiogram QRS complex shortened     | Investigations                                                      |
| Injury, poisoning and procedural complications                      | Cephalhaematoma                      | 1     | Meningocele                                 | Congenital, familial and genetic disorders                          |
| Congenital, familial and genetic disorders                          | Dermoid cyst of ovary                | 1     | Tongue neoplasm malignant stage unspecified | Neoplasms benign, malignant and unspecified (incl cysts and polyps) |
| Investigations                                                      | White blood cells urine              | 1     | Lower respiratory tract inflammation        | Respiratory, thoracic and mediastinal disorders                     |
| Respiratory, thoracic and mediastinal disorders                     | Hypopnoea                            | 1     | Nocturnal dyspnoea                          | Respiratory, thoracic and mediastinal disorders                     |
| Psychiatric disorders                                               | Blunted affect                       | 1     | Self mutilation                             | Injury, poisoning and procedural complications                      |
| Neoplasms benign, malignant and unspecified (incl cysts and polyps) | Bowen's disease                      | 1     | Acanthoma                                   | Neoplasms benign, malignant and unspecified (incl cysts and polyps) |
| Investigations                                                      | Hepatic enzyme                       | 1     | Candida sepsis                              | Infections and infestations                                         |
| Nervous system disorders                                            | Foetal cerebrovascular disorder      | 1     | Microtia                                    | Congenital, familial and genetic disorders                          |
| Gastrointestinal disorders                                          | Gastroesophagitis                    | 1     | Microangiopathy                             | Vascular disorders                                                  |
| Renal and urinary disorders                                         | Calculus ureteric                    | 1     | Urethral obstruction                        | Renal and urinary disorders                                         |
| Investigations                                                      | Glucose tolerance test abnormal      | 1     | HIV infection                               | Infections and infestations                                         |
| Vascular disorders                                                  | Diastolic hypertension               | 1     | Delayed sleep phase                         | Nervous system disorders                                            |
| Infections and infestations                                         | Central nervous system infection     | 1     | Cerebral cyst                               | Nervous system disorders                                            |
| Metabolism and nutrition disorders                                  | Xanthomatosis                        | 1     | Electrooculogram abnormal                   | Investigations                                                      |
| Neoplasms benign, malignant and unspecified (incl cysts and polyps) | Cervix neoplasm                      | 1     | Apolipoprotein B decreased                  | Investigations                                                      |
| Psychiatric disorders                                               | Staring                              | 1     | Gingival swelling                           | Gastrointestinal disorders                                          |
| Neoplasms benign, malignant and unspecified (incl cysts and polyps) | Neurofibroma                         | 1     | Skin dystrophy                              | Skin and subcutaneous tissue disorders                              |

| Basis data for network                                              |                                               |       |                                 |                                                                     |
|---------------------------------------------------------------------|-----------------------------------------------|-------|---------------------------------|---------------------------------------------------------------------|
| SOC1                                                                | AE1                                           | score | AE2                             | SOC2                                                                |
| Endocrine disorders                                                 | Antidiuretic hormone abnormality              | 1     | Synostosis                      | Musculoskeletal and connective tissue disorders                     |
| Investigations                                                      | Myelocyte count increased                     | 1     | Pelvic abscess                  | Infections and infestations                                         |
| Psychiatric disorders                                               | Pressure of speech                            | 1     | Feeling hot and cold            | General disorders and administration site conditions                |
| Cardiac disorders                                                   | Cardiac failure chronic                       | 1     | Blood creatine phosphokinase MB | Investigations                                                      |
| Neoplasms benign, malignant and unspecified (incl cysts and polyps) | Gastrointestinal stromal tumour               | 1     | Laryngeal neoplasm              | Neoplasms benign, malignant and unspecified (incl cysts and polyps) |
| Investigations                                                      | Mean cell haemoglobin concentration increased | 1     | Extraocular muscle paresis      | Eye disorders                                                       |
| Neoplasms benign, malignant and unspecified (incl cysts and polyps) | Blast crisis in myelogenous leukaemia         | 1     | Benign familial haematuria      | Congenital, familial and genetic disorders                          |
| Nervous system disorders                                            | Sleep paralysis                               | 1     | Nocturnal dyspnoea              | Respiratory, thoracic and mediastinal disorders                     |
| Neoplasms benign, malignant and unspecified (incl cysts and polyps) | Tumour necrosis                               | 1     | Hepatic vein thrombosis         | Hepatobiliary disorders                                             |
| Congenital, familial and genetic disorders                          | Urinary tract malformation                    | 1     | Oculomotor study abnormal       | Investigations                                                      |
| Gastrointestinal disorders                                          | Necrotising enterocolitis neonatal            | 1     | Congenital brain damage         | Congenital, familial and genetic disorders                          |
| Investigations                                                      | Histone antibody positive                     | 1     | Toxic induced encephalopathy    | Nervous system disorders                                            |
| Investigations                                                      | Troponin I increased                          | 1     | Pancreatic disorder             | Gastrointestinal disorders                                          |
| Psychiatric disorders                                               | Obsessive-compulsive personality disorder     | 1     | Malignant melanoma in situ      | Neoplasms benign, malignant and unspecified (incl cysts and polyps) |
| Nervous system disorders                                            | Locked-in syndrome                            | 1     | Monoparesis                     | Nervous system disorders                                            |
| Renal and urinary disorders                                         | Urge incontinence                             | 1     | Pancreatic pseudocyst           | Gastrointestinal disorders                                          |
| Nervous system disorders                                            | Ballismus                                     | 1     | Oesophageal neoplasm            | Neoplasms benign, malignant and unspecified (incl cysts and polyps) |
| Cardiac disorders                                                   | Pleuropericarditis                            | 1     | Bronchial neoplasm              | Neoplasms benign, malignant and unspecified (incl cysts and polyps) |
| Investigations                                                      | Glycosylated haemoglobin increased            | 1     | Buttock pain                    | Musculoskeletal and connective tissue disorders                     |
| Investigations                                                      | Ultrasound kidney abnormal                    | 1     | Urinary sediment abnormal       | Investigations                                                      |

| Basis data for network                                              |                                        |       |                                               |                                                                     |
|---------------------------------------------------------------------|----------------------------------------|-------|-----------------------------------------------|---------------------------------------------------------------------|
| SOC1                                                                | AE1                                    | score | AE2                                           | SOC2                                                                |
| Infections and infestations                                         | Infection in an immunocompromised host | 1     | Psychosomatic disease                         | Psychiatric disorders                                               |
| Nervous system disorders                                            | Upper motor neurone lesion             | 1     | Speech disorder developmental                 | Nervous system disorders                                            |
| Vascular disorders                                                  | Embolism venous                        | 1     | Pancreatic disorder                           | Gastrointestinal disorders                                          |
| Neoplasms benign, malignant and unspecified (incl cysts and polyps) | Bile duct cancer                       | 1     | Bilirubin urine                               | Investigations                                                      |
| Gastrointestinal disorders                                          | Pancreatic necrosis                    | 1     | Cerebral palsy                                | Congenital, familial and genetic disorders                          |
| Cardiac disorders                                                   | Cardiomyopathy neonatal                | 1     | Gastroesophagitis                             | Gastrointestinal disorders                                          |
| Reproductive system and breast disorders                            | Spontaneous penile erection            | 1     | Self mutilation                               | Injury, poisoning and procedural complications                      |
| Infections and infestations                                         | Neonatal pneumonia                     | 1     | Neonatal tachypnoea                           | Respiratory, thoracic and mediastinal disorders                     |
| Investigations                                                      | Mean cell volume decreased             | 1     | Mean cell haemoglobin concentration decreased | Investigations                                                      |
| Eye disorders                                                       | Conjunctival ulcer                     | 1     | Hypertrophy                                   | General disorders and administration site conditions                |
| Investigations                                                      | Blood testosterone free increased      | 1     | Toxic induced encephalopathy                  | Nervous system disorders                                            |
| Nervous system disorders                                            | Cerebellar atrophy                     | 1     | Keratoses follicular                          | Congenital, familial and genetic disorders                          |
| Psychiatric disorders                                               | Suspiciousness                         | 1     | Diet refusal                                  | Metabolism and nutrition disorders                                  |
| Nervous system disorders                                            | Acalculia                              | 1     | Lactate pyruvate ratio increased              | Investigations                                                      |
| Investigations                                                      | Hepatic enzyme                         | 1     | Enterococcal bacteraemia                      | Infections and infestations                                         |
| Investigations                                                      | Bone density increased                 | 1     | Glucocorticoids decreased                     | Investigations                                                      |
| Infections and infestations                                         | Enterococcal bacteraemia               | 1     | Bile duct cancer                              | Neoplasms benign, malignant and unspecified (incl cysts and polyps) |
| General disorders and administration site conditions                | Instillation site irritation           | 1     | Instillation site pain                        | General disorders and administration site conditions                |
| Infections and infestations                                         | Neonatal pneumonia                     | 1     | Vomiting neonatal                             | Gastrointestinal disorders                                          |
| Investigations                                                      | Bilirubin urine                        | 1     | Enterococcal bacteraemia                      | Infections and infestations                                         |

| Basis data for network                                              |                                |       |                                        |                                                 |
|---------------------------------------------------------------------|--------------------------------|-------|----------------------------------------|-------------------------------------------------|
| SOC1                                                                | AE1                            | score | AE2                                    | SOC2                                            |
| Respiratory, thoracic and mediastinal disorders                     | Laryngeal obstruction          | 1     | Posterior capsule opacification        | Eye disorders                                   |
| Congenital, familial and genetic disorders                          | Hypertelorism of orbit         | 1     | Acne fulminans                         | Skin and subcutaneous tissue disorders          |
| Respiratory, thoracic and mediastinal disorders                     | Bronchial irritation           | 1     | Sputum test                            | Investigations                                  |
| Respiratory, thoracic and mediastinal disorders                     | Tonsillar disorder             | 1     | Allergy to arthropod bite              | Immune system disorders                         |
| Eye disorders                                                       | Corneal scar                   | 1     | Negative thoughts                      | Psychiatric disorders                           |
| Injury, poisoning and procedural complications                      | Scratch                        | 1     | Spontaneous penile erection            | Reproductive system and breast disorders        |
| Reproductive system and breast disorders                            | Uterine inflammation           | 1     | Infection in an immunocompromised host | Infections and infestations                     |
| Nervous system disorders                                            | Median nerve lesion            | 1     | Lower gastrointestinal haemorrhage     | Gastrointestinal disorders                      |
| Eye disorders                                                       | Phosphenes                     | 1     | Dermoid cyst of ovary                  | Congenital, familial and genetic disorders      |
| Psychiatric disorders                                               | Somatisation disorder          | 1     | Phonological disorder                  | Psychiatric disorders                           |
| Vascular disorders                                                  | Peripheral circulatory failure | 1     | Dysglobulinaemia                       | Blood and lymphatic system disorders            |
| Nervous system disorders                                            | Toxic induced encephalopathy   | 1     | Periarticular disorder                 | Musculoskeletal and connective tissue disorders |
| General disorders and administration site conditions                | Instillation site irritation   | 1     | Chemical eye injury                    | Injury, poisoning and procedural complications  |
| Neoplasms benign, malignant and unspecified (incl cysts and polyps) | Prolactinoma                   | 1     | Anal atresia                           | Congenital, familial and genetic disorders      |
| Respiratory, thoracic and mediastinal disorders                     | Retinoic acid syndrome         | 1     | Thymus hypoplasia                      | Congenital, familial and genetic disorders      |
| Neoplasms benign, malignant and unspecified (incl cysts and polyps) | Hepatoblastoma                 | 1     | Dermoid cyst of ovary                  | Congenital, familial and genetic disorders      |
| Injury, poisoning and procedural complications                      | Ear canal injury               | 1     | Conjunctivitis viral                   | Infections and infestations                     |
| Nervous system disorders                                            | Cerebellar atrophy             | 1     | Tinea versicolour                      | Infections and infestations                     |
| Skin and subcutaneous tissue disorders                              | Ingrowing nail                 | 1     | Nail hypertrophy                       | Skin and subcutaneous tissue disorders          |
| Gastrointestinal disorders                                          | Food poisoning                 | 1     | Periodontal destruction                | Infections and infestations                     |

| Basis data for network                                              |                           |       |                                      |                                                                     |
|---------------------------------------------------------------------|---------------------------|-------|--------------------------------------|---------------------------------------------------------------------|
| SOC1                                                                | AE1                       | score | AE2                                  | SOC2                                                                |
| Musculoskeletal and connective tissue disorders                     | Tendon calcification      | 1     | Hypertelorism of orbit               | Congenital, familial and genetic disorders                          |
| Congenital, familial and genetic disorders                          | Dermoid cyst of ovary     | 1     | Acquired tracheo-oesophageal fistula | Respiratory, thoracic and mediastinal disorders                     |
| General disorders and administration site conditions                | Abasia                    | 1     | Scratch                              | Injury, poisoning and procedural complications                      |
| Neoplasms benign, malignant and unspecified (incl cysts and polyps) | Rectal neoplasm           | 1     | Uterine prolapse                     | Reproductive system and breast disorders                            |
| Metabolism and nutrition disorders                                  | Diet refusal              | 1     | Hallucination, tactile               | Psychiatric disorders                                               |
| Infections and infestations                                         | Abdominal abscess         | 1     | Pelvic abscess                       | Infections and infestations                                         |
| Infections and infestations                                         | Escherichia bacteraemia   | 1     | HIV infection                        | Infections and infestations                                         |
| Infections and infestations                                         | Mucocutaneous candidiasis | 1     | Renal impairment neonatal            | Renal and urinary disorders                                         |
| Respiratory, thoracic and mediastinal disorders                     | Hypopnoea                 | 1     | Sudden onset of sleep                | Nervous system disorders                                            |
| Injury, poisoning and procedural complications                      | Radius fracture           | 1     | Testis discomfort                    | Reproductive system and breast disorders                            |
| Metabolism and nutrition disorders                                  | Fluid intake reduced      | 1     | Melanosis coli                       | Gastrointestinal disorders                                          |
| Neoplasms benign, malignant and unspecified (incl cysts and polyps) | Seborrhoeic keratosis     | 1     | Vulval cancer                        | Neoplasms benign, malignant and unspecified (incl cysts and polyps) |
| Blood and lymphatic system disorders                                | Pernicious anaemia        | 1     | Papillary muscle disorder            | Cardiac disorders                                                   |
| Hepatobiliary disorders                                             | Budd-Chiari syndrome      | 1     | Tumour necrosis                      | Neoplasms benign, malignant and unspecified (incl cysts and polyps) |
| Eye disorders                                                       | Phosphenes                | 1     | Hepatoblastoma                       | Neoplasms benign, malignant and unspecified (incl cysts and polyps) |
| Congenital, familial and genetic disorders                          | Cryptorchism              | 1     | Haptoglobin decreased                | Investigations                                                      |
| General disorders and administration site conditions                | Microlithiasis            | 1     | Bladder papilloma                    | Neoplasms benign, malignant and unspecified (incl cysts and polyps) |
| General disorders and administration site conditions                | Application site scar     | 1     | Biopsy endometrium                   | Investigations                                                      |
| Musculoskeletal and connective tissue disorders                     | Dwarfism                  | 1     | Malignant hydatidiform mole          | Neoplasms benign, malignant and unspecified (incl cysts and polyps) |
| Neoplasms benign, malignant and unspecified (incl cysts and polyps) | Anaplastic thyroid cancer | 1     | Pelvic peritoneal adhesions          | Reproductive system and breast disorders                            |



| Basis data for network                               |                                           |       |                                        |                                                                     |
|------------------------------------------------------|-------------------------------------------|-------|----------------------------------------|---------------------------------------------------------------------|
| SOC1                                                 | AE1                                       | score | AE2                                    | SOC2                                                                |
| Infections and infestations                          | Renal abscess                             | 1     | Pituitary haemorrhage                  | Endocrine disorders                                                 |
| Investigations                                       | Blood creatine phosphokinase MB increased | 1     | Coccydynia                             | Musculoskeletal and connective tissue disorders                     |
| Respiratory, thoracic and mediastinal disorders      | Acquired tracheo-oesophageal fistula      | 1     | Phosphenes                             | Eye disorders                                                       |
| Investigations                                       | Blood creatine phosphokinase MB increased | 1     | Intention tremor                       | Nervous system disorders                                            |
| Infections and infestations                          | Sweat gland infection                     | 1     | Tinea versicolour                      | Infections and infestations                                         |
| General disorders and administration site conditions | Application site anaesthesia              | 1     | Trichomoniasis                         | Infections and infestations                                         |
| Infections and infestations                          | Abscess of salivary gland                 | 1     | Kidney infection                       | Infections and infestations                                         |
| Investigations                                       | Blood iron increased                      | 1     | Haptoglobin decreased                  | Investigations                                                      |
| General disorders and administration site conditions | Sensation of foreign body                 | 1     | Protein urine                          | Investigations                                                      |
| Gastrointestinal disorders                           | Gastroduodenal haemorrhage                | 1     | Tonsillar disorder                     | Respiratory, thoracic and mediastinal disorders                     |
| Injury, poisoning and procedural complications       | Humerus fracture                          | 1     | Peritonsillar abscess                  | Infections and infestations                                         |
| Congenital, familial and genetic disorders           | Hyperexplexia                             | 1     | Creutzfeldt-Jakob disease              | Infections and infestations                                         |
| Investigations                                       | High density lipoprotein abnormal         | 1     | Pancreatorenal syndrome                | Renal and urinary disorders                                         |
| Eye disorders                                        | Retinal deposits                          | 1     | Kidney infection                       | Infections and infestations                                         |
| Congenital, familial and genetic disorders           | Congenital bladder anomaly                | 1     | Congenital cerebral cyst               | Congenital, familial and genetic disorders                          |
| Congenital, familial and genetic disorders           | Sickle cell anaemia with crisis           | 1     | Ulnar nerve injury                     | Injury, poisoning and procedural complications                      |
| Eye disorders                                        | Phosphenes                                | 1     | Glioblastoma multiforme                | Neoplasms benign, malignant and unspecified (incl cysts and polyps) |
| Metabolism and nutrition disorders                   | Hypoglycaemia neonatal                    | 1     | Neonatal respiratory distress syndrome | Respiratory, thoracic and mediastinal disorders                     |
| Congenital, familial and genetic disorders           | Cerebral palsy                            | 1     | Abulia                                 | Psychiatric disorders                                               |
| Investigations                                       | Blood creatine phosphokinase MB increased | 1     | Mastication disorder                   | Nervous system disorders                                            |

| Basis data for network                                              |                               |       |                                           |                                                                     |
|---------------------------------------------------------------------|-------------------------------|-------|-------------------------------------------|---------------------------------------------------------------------|
| SOC1                                                                | AE1                           | score | AE2                                       | SOC2                                                                |
| Infections and infestations                                         | Application site abscess      | 1     | Trichomoniasis                            | Infections and infestations                                         |
| Investigations                                                      | Urine vitamin K decreased     | 1     | Red man syndrome                          | Skin and subcutaneous tissue disorders                              |
| Neoplasms benign, malignant and unspecified (incl cysts and polyps) | Keratoacanthoma               | 1     | Lymphomatoid papulosis                    | Skin and subcutaneous tissue disorders                              |
| Infections and infestations                                         | Candida sepsis                | 1     | Bile duct cancer                          | Neoplasms benign, malignant and unspecified (incl cysts and polyps) |
| Infections and infestations                                         | Candida sepsis                | 1     | Bilirubin urine                           | Investigations                                                      |
| Infections and infestations                                         | Central line infection        | 1     | Mediastinal disorder                      | Respiratory, thoracic and mediastinal disorders                     |
| General disorders and administration site conditions                | Fever neonatal                | 1     | Neonatal infection                        | Infections and infestations                                         |
| Congenital, familial and genetic disorders                          | Congenital joint malformation | 1     | Choriocarcinoma                           | Neoplasms benign, malignant and unspecified (incl cysts and polyps) |
| Injury, poisoning and procedural complications                      | Scrotal haematoma             | 1     | Ovarian atrophy                           | Reproductive system and breast disorders                            |
| Nervous system disorders                                            | Dizziness exertional          | 1     | Blood creatine phosphokinase MB increased | Investigations                                                      |
| General disorders and administration site conditions                | Pseudocyst                    | 1     | Pancreatic necrosis                       | Gastrointestinal disorders                                          |
| Eye disorders                                                       | Eye degenerative disorder     | 1     | Eustachian tube dysfunction               | Ear and labyrinth disorders                                         |
| Neoplasms benign, malignant and unspecified (incl cysts and polyps) | Oesophageal neoplasm          | 1     | Intervertebral disc disorder              | Musculoskeletal and connective tissue disorders                     |
| Infections and infestations                                         | Salpingo-oophoritis           | 1     | Diabetic neuropathy                       | Nervous system disorders                                            |
| Infections and infestations                                         | Neonatal pneumonia            | 1     | Fever neonatal                            | General disorders and administration site conditions                |
| Congenital, familial and genetic disorders                          | Dermoid cyst of ovary         | 1     | Choriocarcinoma                           | Neoplasms benign, malignant and unspecified (incl cysts and polyps) |
| Neoplasms benign, malignant and unspecified (incl cysts and polyps) | Malignant melanoma in situ    | 1     | Aortic dissection                         | Vascular disorders                                                  |
| Infections and infestations                                         | Creutzfeldt-Jakob disease     | 1     | Low turnover osteopathy                   | Musculoskeletal and connective tissue disorders                     |
| Musculoskeletal and connective tissue disorders                     | Dwarfism                      | 1     | Pituitary tumour                          | Neoplasms benign, malignant and unspecified (incl cysts and polyps) |
| Neoplasms benign, malignant and unspecified (incl cysts and polyps) | Brain neoplasm benign         | 1     | Menstrual discomfort                      | Reproductive system and breast disorders                            |

| Basis data for network                                              |                                 |       |                             |                                                                     |
|---------------------------------------------------------------------|---------------------------------|-------|-----------------------------|---------------------------------------------------------------------|
| SOC1                                                                | AE1                             | score | AE2                         | SOC2                                                                |
| Nervous system disorders                                            | Neurodegenerative disorder      | 1     | Pseudocyst                  | General disorders and administration site conditions                |
| General disorders and administration site conditions                | Infusion related reaction       | 1     | Enterococcal bacteraemia    | Infections and infestations                                         |
| Nervous system disorders                                            | Cerebral haemorrhage foetal     | 1     | Renal infarct               | Renal and urinary disorders                                         |
| Infections and infestations                                         | Kidney infection                | 1     | Globulins decreased         | Investigations                                                      |
| Blood and lymphatic system disorders                                | Neutropenia neonatal            | 1     | Craniosynostosis            | Musculoskeletal and connective tissue disorders                     |
| Neoplasms benign, malignant and unspecified (incl cysts and polyps) | Malignant hydatidiform mole     | 1     | Pituitary tumour            | Neoplasms benign, malignant and unspecified (incl cysts and polyps) |
| Psychiatric disorders                                               | Negative thoughts               | 1     | Fibrin decreased            | Investigations                                                      |
| General disorders and administration site conditions                | Sensation of foreign body       | 1     | Allergic sinusitis          | Respiratory, thoracic and mediastinal disorders                     |
| Infections and infestations                                         | Cerebral toxoplasmosis          | 1     | Leishmaniasis               | Infections and infestations                                         |
| Nervous system disorders                                            | Dyspraxia                       | 1     | Drug withdrawal convulsions | Nervous system disorders                                            |
| Gastrointestinal disorders                                          | Glossoptosis                    | 1     | Staring                     | Psychiatric disorders                                               |
| Eye disorders                                                       | Eye degenerative disorder       | 1     | Pulmonary thrombosis        | Respiratory, thoracic and mediastinal disorders                     |
| Reproductive system and breast disorders                            | Uterine prolapse                | 1     | Gastric atony               | Gastrointestinal disorders                                          |
| Infections and infestations                                         | Candida sepsis                  | 1     | Infusion related reaction   | General disorders and administration site conditions                |
| Blood and lymphatic system disorders                                | Myeloid maturation arrest       | 1     | Histone antibody positive   | Investigations                                                      |
| Congenital, familial and genetic disorders                          | Talipes                         | 1     | Hyperhomocysteinaemia       | Metabolism and nutrition disorders                                  |
| Gastrointestinal disorders                                          | Intestinal mass                 | 1     | Lip blister                 | Gastrointestinal disorders                                          |
| Investigations                                                      | Blood creatine phosphokinase MB | 1     | Pancreatic disorder         | Gastrointestinal disorders                                          |
| Infections and infestations                                         | Urogenital trichomoniasis       | 1     | Bleeding anovulatory        | Reproductive system and breast disorders                            |
| Infections and infestations                                         | Urogenital trichomoniasis       | 1     | Food allergy                | Immune system disorders                                             |

| Basis data for network                               |                                     |       |                                           |                                                 |
|------------------------------------------------------|-------------------------------------|-------|-------------------------------------------|-------------------------------------------------|
| SOC1                                                 | AE1                                 | score | AE2                                       | SOC2                                            |
| Investigations                                       | Neutrophil percentage decreased     | 1     | Neutrophil percentage increased           | Investigations                                  |
| Nervous system disorders                             | Dysstasia                           | 1     | Sudden onset of sleep                     | Nervous system disorders                        |
| Eye disorders                                        | Scleromalacia                       | 1     | Tendon injury                             | Injury, poisoning and procedural complications  |
| Investigations                                       | Reverse tri-iodothyronine increased | 1     | Papillary muscle disorder                 | Cardiac disorders                               |
| Injury, poisoning and procedural complications       | Foot fracture                       | 1     | Helicobacter infection                    | Infections and infestations                     |
| Investigations                                       | Fibrin decreased                    | 1     | Drug withdrawal convulsions               | Nervous system disorders                        |
| Congenital, familial and genetic disorders           | Homocystinaemia                     | 1     | Urinary tract malformation                | Congenital, familial and genetic disorders      |
| Reproductive system and breast disorders             | Spontaneous penile erection         | 1     | Blood creatine phosphokinase MB increased | Investigations                                  |
| Infections and infestations                          | Central line infection              | 1     | Peridiverticular abscess                  | Infections and infestations                     |
| Infections and infestations                          | Cytomegalovirus colitis             | 1     | Leishmaniasis                             | Infections and infestations                     |
| Infections and infestations                          | Plasmodium falciparum infection     | 1     | Antiphospholipid antibodies               | Investigations                                  |
| Infections and infestations                          | Central line infection              | 1     | Lung infection pseudomonal                | Infections and infestations                     |
| General disorders and administration site conditions | Catheter site haemorrhage           | 1     | Mediastinal disorder                      | Respiratory, thoracic and mediastinal disorders |
| Musculoskeletal and connective tissue disorders      | Joint ankylosis                     | 1     | Foot fracture                             | Injury, poisoning and procedural complications  |
| General disorders and administration site conditions | Secretion discharge                 | 1     | Pupillary disorder                        | Eye disorders                                   |
| Nervous system disorders                             | Lacunar infarction                  | 1     | Foot fracture                             | Injury, poisoning and procedural complications  |
| Nervous system disorders                             | Atonic seizures                     | 1     | Myeloid maturation arrest                 | Blood and lymphatic system disorders            |
| Infections and infestations                          | Amoebiasis                          | 1     | Nocardiosis                               | Infections and infestations                     |
| Congenital, familial and genetic disorders           | Cerebral palsy                      | 1     | Hyperhomocysteinaemia                     | Metabolism and nutrition disorders              |
| Investigations                                       | Glycosylated haemoglobin increased  | 1     | Periorbital haematoma                     | Injury, poisoning and procedural complications  |

| Basis data for network                                              |                                 |       |                                           |                                                      |
|---------------------------------------------------------------------|---------------------------------|-------|-------------------------------------------|------------------------------------------------------|
| SOC1                                                                | AE1                             | score | AE2                                       | SOC2                                                 |
| Nervous system disorders                                            | Dyspraxia                       | 1     | Intracranial venous sinus thrombosis      | Nervous system disorders                             |
| Respiratory, thoracic and mediastinal disorders                     | Pneumomediastinum               | 1     | Renal infarct                             | Renal and urinary disorders                          |
| Blood and lymphatic system disorders                                | Neutropenia neonatal            | 1     | Ovarian fibrosis                          | Reproductive system and breast disorders             |
| Eye disorders                                                       | Eye degenerative disorder       | 1     | Lip haemorrhage                           | Gastrointestinal disorders                           |
| Metabolism and nutrition disorders                                  | Hyperproteinaemia               | 1     | Food poisoning                            | Gastrointestinal disorders                           |
| Nervous system disorders                                            | Lennox-Gastaut syndrome         | 1     | Fibrin decreased                          | Investigations                                       |
| General disorders and administration site conditions                | Catheter site haemorrhage       | 1     | Mycobacterium avium complex infection     | Infections and infestations                          |
| Cardiac disorders                                                   | Coronary artery dissection      | 1     | Pneumomediastinum                         | Respiratory, thoracic and mediastinal disorders      |
| Neoplasms benign, malignant and unspecified (incl cysts and polyps) | Bile duct cancer                | 1     | Infusion related reaction                 | General disorders and administration site conditions |
| Investigations                                                      | Bilirubin urine                 | 1     | Infusion related reaction                 | General disorders and administration site conditions |
| Congenital, familial and genetic disorders                          | Congenital joint malformation   | 1     | Anal atresia                              | Congenital, familial and genetic disorders           |
| Congenital, familial and genetic disorders                          | Cerebral palsy                  | 1     | Acquired afibrinogenaemia                 | Blood and lymphatic system disorders                 |
| Respiratory, thoracic and mediastinal disorders                     | Pneumomediastinum               | 1     | Congenital brain damage                   | Congenital, familial and genetic disorders           |
| Metabolism and nutrition disorders                                  | Diet refusal                    | 1     | Blood creatine phosphokinase MB increased | Investigations                                       |
| Investigations                                                      | Renin increased                 | 1     | Phenolsulfonphthalein test                | Investigations                                       |
| Neoplasms benign, malignant and unspecified (incl cysts and polyps) | Throat cancer                   | 1     | Radius fracture                           | Injury, poisoning and procedural complications       |
| Investigations                                                      | Blood chromium decreased        | 1     | Posterior capsule opacification           | Eye disorders                                        |
| Investigations                                                      | Neutrophil percentage decreased | 1     | Subdural haemorrhage                      | Injury, poisoning and procedural complications       |
| Nervous system disorders                                            | Cerebral haemorrhage foetal     | 1     | Congenital brain damage                   | Congenital, familial and genetic disorders           |
| Investigations                                                      | Neutrophil percentage decreased | 1     | Fungal rash                               | Infections and infestations                          |

| Basis data for network                                              |                                        |       |                                        |                                                                     |
|---------------------------------------------------------------------|----------------------------------------|-------|----------------------------------------|---------------------------------------------------------------------|
| SOC1                                                                | AE1                                    | score | AE2                                    | SOC2                                                                |
| Investigations                                                      | Blood copper decreased                 | 1     | Urine iron increased                   | Investigations                                                      |
| Investigations                                                      | Haptoglobin decreased                  | 1     | Supernumerary nipple                   | Congenital, familial and genetic disorders                          |
| Metabolism and nutrition disorders                                  | Hypermetabolism                        | 1     | Somatic delusion                       | Psychiatric disorders                                               |
| Nervous system disorders                                            | Intracranial venous sinus thrombosis   | 1     | Fibrin decreased                       | Investigations                                                      |
| General disorders and administration site conditions                | Pseudocyst                             | 1     | Acquired afibrinogenaemia              | Blood and lymphatic system disorders                                |
| Nervous system disorders                                            | Dyspraxia                              | 1     | Negative thoughts                      | Psychiatric disorders                                               |
| Investigations                                                      | Blood chromium decreased               | 1     | Nasal mucosa atrophy                   | Respiratory, thoracic and mediastinal disorders                     |
| Blood and lymphatic system disorders                                | Myeloid maturation arrest              | 1     | Oligodipsia                            | Metabolism and nutrition disorders                                  |
| Gastrointestinal disorders                                          | Splenic artery aneurysm                | 1     | Rectal stenosis                        | Gastrointestinal disorders                                          |
| Investigations                                                      | Coagulation factor XII level increased | 1     | Coagulation factor VII level increased | Investigations                                                      |
| Investigations                                                      | Phenolsulfonphthalein test             | 1     | Bartter's syndrome                     | Congenital, familial and genetic disorders                          |
| Eye disorders                                                       | Phosphenes                             | 1     | Choriocarcinoma                        | Neoplasms benign, malignant and unspecified (incl cysts and polyps) |
| Blood and lymphatic system disorders                                | Splenic infarction                     | 1     | Conjunctival deposit                   | Eye disorders                                                       |
| Neoplasms benign, malignant and unspecified (incl cysts and polyps) | Metastatic neoplasm                    | 1     | Candida sepsis                         | Infections and infestations                                         |
| Infections and infestations                                         | Bacterial sepsis                       | 1     | Disseminated tuberculosis              | Infections and infestations                                         |
| Neoplasms benign, malignant and unspecified (incl cysts and polyps) | Hepatoblastoma                         | 1     | Choriocarcinoma                        | Neoplasms benign, malignant and unspecified (incl cysts and polyps) |
| Neoplasms benign, malignant and unspecified (incl cysts and polyps) | Choriocarcinoma                        | 1     | Acquired tracheo-oesophageal fistula   | Respiratory, thoracic and mediastinal disorders                     |
| Congenital, familial and genetic disorders                          | Cerebral palsy                         | 1     | Neurodegenerative disorder             | Nervous system disorders                                            |
| Infections and infestations                                         | Disseminated tuberculosis              | 1     | Pseudomonal sepsis                     | Infections and infestations                                         |
| Blood and lymphatic system disorders                                | Neutropenia neonatal                   | 1     | Congenital nose malformation           | Congenital, familial and genetic disorders                          |

| Basis data for network                                              |                                               |       |                                             |                                                                     |
|---------------------------------------------------------------------|-----------------------------------------------|-------|---------------------------------------------|---------------------------------------------------------------------|
| SOC1                                                                | AE1                                           | score | AE2                                         | SOC2                                                                |
| Musculoskeletal and connective tissue disorders                     | Collagen disorder                             | 1     | Copper deficiency                           | Metabolism and nutrition disorders                                  |
| Psychiatric disorders                                               | Blunted affect                                | 1     | Scratch                                     | Injury, poisoning and procedural complications                      |
| Congenital, familial and genetic disorders                          | Neurofibromatosis                             | 1     | Hepatoblastoma                              | Neoplasms benign, malignant and unspecified (incl cysts and polyps) |
| Eye disorders                                                       | Phosphenes                                    | 1     | Tongue neoplasm malignant stage unspecified | Neoplasms benign, malignant and unspecified (incl cysts and polyps) |
| Infections and infestations                                         | Tuberculosis of eye                           | 1     | Optic nerve injury                          | Injury, poisoning and procedural complications                      |
| Neoplasms benign, malignant and unspecified (incl cysts and polyps) | Hepatoblastoma                                | 1     | Tongue neoplasm malignant stage unspecified | Neoplasms benign, malignant and unspecified (incl cysts and polyps) |
| Neoplasms benign, malignant and unspecified (incl cysts and polyps) | Bile duct cancer                              | 1     | Escherichia bacteraemia                     | Infections and infestations                                         |
| Investigations                                                      | Mean cell haemoglobin concentration increased | 1     | Secretion discharge                         | General disorders and administration site conditions                |
| Respiratory, thoracic and mediastinal disorders                     | Acquired tracheo-oesophageal fistula          | 1     | Tongue neoplasm malignant stage unspecified | Neoplasms benign, malignant and unspecified (incl cysts and polyps) |
| Congenital, familial and genetic disorders                          | Talipes                                       | 1     | Abulia                                      | Psychiatric disorders                                               |
| Gastrointestinal disorders                                          | Gastrointestinal mucosal disorder             | 1     | Central-alveolar hypoventilation            | Nervous system disorders                                            |
| Neoplasms benign, malignant and unspecified (incl cysts and polyps) | Acute lymphocytic leukaemia                   | 1     | Exomphalos                                  | Congenital, familial and genetic disorders                          |
| Investigations                                                      | Bilirubin urine                               | 1     | Escherichia bacteraemia                     | Infections and infestations                                         |
| Renal and urinary disorders                                         | Renal necrosis                                | 1     | Proctitis ulcerative                        | Gastrointestinal disorders                                          |
| Infections and infestations                                         | Renal abscess                                 | 1     | Biliary dilatation                          | Hepatobiliary disorders                                             |
| Injury, poisoning and procedural complications                      | Foot fracture                                 | 1     | Sickle cell anaemia                         | Congenital, familial and genetic disorders                          |
| Renal and urinary disorders                                         | Acute prerenal failure                        | 1     | Tumour necrosis                             | Neoplasms benign, malignant and unspecified (incl cysts and polyps) |
| Metabolism and nutrition disorders                                  | Diet refusal                                  | 1     | Spontaneous penile erection                 | Reproductive system and breast disorders                            |
| Nervous system disorders                                            | Intracranial venous sinus thrombosis          | 1     | Corneal scar                                | Eye disorders                                                       |
| Eye disorders                                                       | Extraocular muscle paresis                    | 1     | Pupillary disorder                          | Eye disorders                                                       |

| Basis data for network                               |                                 |       |                                    |                                                                     |
|------------------------------------------------------|---------------------------------|-------|------------------------------------|---------------------------------------------------------------------|
| SOC1                                                 | AE1                             | score | AE2                                | SOC2                                                                |
| Investigations                                       | Oculomotor study abnormal       | 1     | Hypoxic encephalopathy             | Nervous system disorders                                            |
| Immune system disorders                              | Allergy to arthropod bite       | 1     | Lower gastrointestinal haemorrhage | Gastrointestinal disorders                                          |
| Gastrointestinal disorders                           | Pancreatic pseudocyst           | 1     | Brain hypoxia                      | Respiratory, thoracic and mediastinal disorders                     |
| Congenital, familial and genetic disorders           | Neurofibromatosis               | 1     | Phosphenes                         | Eye disorders                                                       |
| Psychiatric disorders                                | Sleep attacks                   | 1     | Dysstasia                          | Nervous system disorders                                            |
| General disorders and administration site conditions | Abasia                          | 1     | Spontaneous penile erection        | Reproductive system and breast disorders                            |
| Musculoskeletal and connective tissue disorders      | Dwarfism                        | 1     | Congenital joint malformation      | Congenital, familial and genetic disorders                          |
| Investigations                                       | Blood glucose fluctuation       | 1     | Lip haemorrhage                    | Gastrointestinal disorders                                          |
| Metabolism and nutrition disorders                   | Diet refusal                    | 1     | Self mutilation                    | Injury, poisoning and procedural complications                      |
| Congenital, familial and genetic disorders           | Congenital joint malformation   | 1     | Malignant hydatidiform mole        | Neoplasms benign, malignant and unspecified (incl cysts and polyps) |
| Nervous system disorders                             | Foetal cerebrovascular disorder | 1     | Retained placenta or membranes     | Pregnancy, puerperium and perinatal conditions                      |
| Infections and infestations                          | Tinea versicolour               | 1     | Keratosis follicular               | Congenital, familial and genetic disorders                          |
| General disorders and administration site conditions | Injection site paraesthesia     | 1     | Radius fracture                    | Injury, poisoning and procedural complications                      |
| Musculoskeletal and connective tissue disorders      | Intervertebral disc disorder    | 1     | Gastric atony                      | Gastrointestinal disorders                                          |
| Injury, poisoning and procedural complications       | Ear canal injury                | 1     | Chemical eye injury                | Injury, poisoning and procedural complications                      |
| Metabolism and nutrition disorders                   | Diet refusal                    | 1     | Scratch                            | Injury, poisoning and procedural complications                      |
| Investigations                                       | Haptoglobin decreased           | 1     | Madarosis                          | Eye disorders                                                       |
| General disorders and administration site conditions | Application site scar           | 1     | Application site abscess           | Infections and infestations                                         |
| Investigations                                       | Blood chromium decreased        | 1     | Chorioretinopathy                  | Eye disorders                                                       |
| General disorders and administration site conditions | Instillation site pain          | 1     | Ear canal injury                   | Injury, poisoning and procedural complications                      |



| Basis data for network                                              |                                   |       |                                           |                                                      |
|---------------------------------------------------------------------|-----------------------------------|-------|-------------------------------------------|------------------------------------------------------|
| SOC1                                                                | AE1                               | score | AE2                                       | SOC2                                                 |
| Investigations                                                      | Urine bilirubin increased         | 1     | Dysglobulinaemia                          | Blood and lymphatic system disorders                 |
| Neoplasms benign, malignant and unspecified (incl cysts and polyps) | Metastatic neoplasm               | 1     | Enterococcal bacteraemia                  | Infections and infestations                          |
| Gastrointestinal disorders                                          | Proctitis ulcerative              | 1     | Creatinine renal clearance                | Investigations                                       |
| Musculoskeletal and connective tissue disorders                     | Periarticular disorder            | 1     | Myeloid maturation arrest                 | Blood and lymphatic system disorders                 |
| Nervous system disorders                                            | Ballismus                         | 1     | Gastric atony                             | Gastrointestinal disorders                           |
| Infections and infestations                                         | HIV infection                     | 1     | Systemic candida                          | Infections and infestations                          |
| Investigations                                                      | Blood testosterone free increased | 1     | Myeloid maturation arrest                 | Blood and lymphatic system disorders                 |
| Investigations                                                      | Myelocyte count increased         | 1     | Infusion site warmth                      | General disorders and administration site conditions |
| Injury, poisoning and procedural complications                      | Self mutilation                   | 1     | Blood creatine phosphokinase MB increased | Investigations                                       |
| Infections and infestations                                         | Cerebral toxoplasmosis            | 1     | Cytomegalovirus colitis                   | Infections and infestations                          |
| Skin and subcutaneous tissue disorders                              | Acne fulminans                    | 1     | Thymus hypoplasia                         | Congenital, familial and genetic disorders           |
| Investigations                                                      | Haptoglobin increased             | 1     | Supernumerary nipple                      | Congenital, familial and genetic disorders           |
| Nervous system disorders                                            | Foetal cerebrovascular disorder   | 1     | Congenital bladder anomaly                | Congenital, familial and genetic disorders           |
| Ear and labyrinth disorders                                         | Eustachian tube dysfunction       | 1     | Capillary fragility increased             | Investigations                                       |
| Renal and urinary disorders                                         | Renal infarct                     | 1     | Nose deformity                            | Musculoskeletal and connective tissue disorders      |
| Gastrointestinal disorders                                          | Vomiting neonatal                 | 1     | Neonatal tachypnoea                       | Respiratory, thoracic and mediastinal disorders      |
| Investigations                                                      | Protein urine                     | 1     | Dysstasia                                 | Nervous system disorders                             |
| Gastrointestinal disorders                                          | Eosinophilic colitis              | 1     | Urinary tract malformation                | Congenital, familial and genetic disorders           |
| Ear and labyrinth disorders                                         | Eustachian tube dysfunction       | 1     | Diabetic retinopathy                      | Eye disorders                                        |
| Infections and infestations                                         | Pseudomonas infection             | 1     | Catheter site haemorrhage                 | General disorders and administration site conditions |

| Basis data for network                                              |                                 |       |                                           |                                                                     |
|---------------------------------------------------------------------|---------------------------------|-------|-------------------------------------------|---------------------------------------------------------------------|
| SOC1                                                                | AE1                             | score | AE2                                       | SOC2                                                                |
| Injury, poisoning and procedural complications                      | Scratch                         | 1     | Blood creatine phosphokinase MB increased | Investigations                                                      |
| Respiratory, thoracic and mediastinal disorders                     | Mediastinal cyst                | 1     | Vascular calcification                    | Vascular disorders                                                  |
| Gastrointestinal disorders                                          | Pancreatic fistula              | 1     | Peritoneal fibrosis                       | Gastrointestinal disorders                                          |
| Investigations                                                      | Haptoglobin decreased           | 1     | Intervertebral disc space narrowing       | Musculoskeletal and connective tissue disorders                     |
| Congenital, familial and genetic disorders                          | Porencephaly                    | 1     | Cerebral atrophy                          | Nervous system disorders                                            |
| Congenital, familial and genetic disorders                          | Thymus hypoplasia               | 1     | Tendon calcification                      | Musculoskeletal and connective tissue disorders                     |
| Skin and subcutaneous tissue disorders                              | Skin dystrophy                  | 1     | Acanthoma                                 | Neoplasms benign, malignant and unspecified (incl cysts and polyps) |
| Nervous system disorders                                            | Foetal cerebrovascular disorder | 1     | Postpartum haemorrhage                    | Pregnancy, puerperium and perinatal conditions                      |
| Gastrointestinal disorders                                          | Pancreatic pseudocyst           | 1     | Arteriopathic disease                     | Vascular disorders                                                  |
| Investigations                                                      | White blood cell count          | 1     | HIV infection                             | Infections and infestations                                         |
| Congenital, familial and genetic disorders                          | Neurofibromatosis               | 1     | Acquired tracheo-oesophageal fistula      | Respiratory, thoracic and mediastinal disorders                     |
| Investigations                                                      | Urine bilirubin increased       | 1     | Peripheral circulatory failure            | Vascular disorders                                                  |
| Cardiac disorders                                                   | Acute left ventricular failure  | 1     | Superior sagittal sinus thrombosis        | Nervous system disorders                                            |
| Neoplasms benign, malignant and unspecified (incl cysts and polyps) | Oesophageal neoplasm            | 1     | Uterine prolapse                          | Reproductive system and breast disorders                            |
| Metabolism and nutrition disorders                                  | Vitamin D deficiency            | 1     | Hypoxic encephalopathy                    | Nervous system disorders                                            |
| Cardiac disorders                                                   | Endocardial disease             | 1     | Post procedural haematoma                 | Injury, poisoning and procedural complications                      |
| Infections and infestations                                         | HIV infection                   | 1     | Metastases to lung                        | Neoplasms benign, malignant and unspecified (incl cysts and polyps) |
| Skin and subcutaneous tissue disorders                              | Lichenification                 | 1     | Haptoglobin increased                     | Investigations                                                      |
| Infections and infestations                                         | Urinary tract infection fungal  | 1     | Alcoholic pancreatitis                    | Gastrointestinal disorders                                          |
| Respiratory, thoracic and mediastinal disorders                     | Retinoic acid syndrome          | 1     | White blood cells urine                   | Investigations                                                      |

| Basis data for network                                              |                                    |       |                                          |                                                 |
|---------------------------------------------------------------------|------------------------------------|-------|------------------------------------------|-------------------------------------------------|
| SOC1                                                                | AE1                                | score | AE2                                      | SOC2                                            |
| Congenital, familial and genetic disorders                          | Skeleton dysplasia                 | 1     | Fibrous dysplasia of bone                | Congenital, familial and genetic disorders      |
| Neoplasms benign, malignant and unspecified (incl cysts and polyps) | Lymphoma cutis                     | 1     | Haptoglobin decreased                    | Investigations                                  |
| Injury, poisoning and procedural complications                      | Scrotal haematoma                  | 1     | Scrotal infection                        | Infections and infestations                     |
| Injury, poisoning and procedural complications                      | Foot fracture                      | 1     | Gingival infection                       | Infections and infestations                     |
| Investigations                                                      | Haptoglobin increased              | 1     | Senile ankylosing vertebral hyperostosis | Musculoskeletal and connective tissue disorders |
| Investigations                                                      | Antiphospholipid antibodies        | 1     | Congenital optic nerve anomaly           | Congenital, familial and genetic disorders      |
| Gastrointestinal disorders                                          | Saliva discolouration              | 1     | Tear discolouration                      | Eye disorders                                   |
| Infections and infestations                                         | Lobar pneumonia                    | 1     | Electrophoresis abnormal                 | Investigations                                  |
| Neoplasms benign, malignant and unspecified (incl cysts and polyps) | Polycythaemia vera                 | 1     | Bone marrow myelogram abnormal           | Investigations                                  |
| Congenital, familial and genetic disorders                          | Chondrodystrophy                   | 1     | Cephalhaematoma                          | Injury, poisoning and procedural complications  |
| Immune system disorders                                             | Allergy to chemicals               | 1     | Renal impairment neonatal                | Renal and urinary disorders                     |
| Congenital, familial and genetic disorders                          | Optic nerve hypoplasia             | 1     | White blood cells urine                  | Investigations                                  |
| Reproductive system and breast disorders                            | Spontaneous penile erection        | 1     | Dizziness exertional                     | Nervous system disorders                        |
| Investigations                                                      | Blood zinc increased               | 1     | Blood zinc abnormal                      | Investigations                                  |
| Gastrointestinal disorders                                          | Large intestinal ulcer haemorrhage | 1     | X-ray abnormal                           | Investigations                                  |
| Infections and infestations                                         | Escherichia bacteraemia            | 1     | Enterococcal bacteraemia                 | Infections and infestations                     |
| Psychiatric disorders                                               | Automatism                         | 1     | Delayed sleep phase                      | Nervous system disorders                        |
| Gastrointestinal disorders                                          | Rectal polyp                       | 1     | Pleural rub                              | Respiratory, thoracic and mediastinal disorders |
| Infections and infestations                                         | Epstein-Barr virus infection       | 1     | Diabetes mellitus insulin-dependent      | Metabolism and nutrition disorders              |
| Eye disorders                                                       | Ocular myasthenia                  | 1     | Vitamin B complex deficiency             | Metabolism and nutrition disorders              |

| Basis data for network                                              |                                      |       |                                           |                                                      |
|---------------------------------------------------------------------|--------------------------------------|-------|-------------------------------------------|------------------------------------------------------|
| SOC1                                                                | AE1                                  | score | AE2                                       | SOC2                                                 |
| Gastrointestinal disorders                                          | Gastrooesophagitis                   | 1     | Diabetes mellitus insulin-dependent       | Metabolism and nutrition disorders                   |
| Nervous system disorders                                            | Mastication disorder                 | 1     | Parkinsonian rest tremor                  | Nervous system disorders                             |
| Congenital, familial and genetic disorders                          | Blepharophimosis congenital          | 1     | Ureteritis                                | Infections and infestations                          |
| Infections and infestations                                         | Pneumonia fungal                     | 1     | Cardiac ventricular disorder              | Cardiac disorders                                    |
| Respiratory, thoracic and mediastinal disorders                     | Lower respiratory tract inflammation | 1     | Thymus hypoplasia                         | Congenital, familial and genetic disorders           |
| Investigations                                                      | Platelet aggregation abnormal        | 1     | Respiratory tract haemorrhage             | Respiratory, thoracic and mediastinal disorders      |
| General disorders and administration site conditions                | Bloody discharge                     | 1     | Nonspecific reaction                      | General disorders and administration site conditions |
| Gastrointestinal disorders                                          | Gastrooesophagitis                   | 1     | Bullous impetigo                          | Infections and infestations                          |
| Gastrointestinal disorders                                          | Gastrointestinal erosion             | 1     | Arterial rupture                          | Vascular disorders                                   |
| Vascular disorders                                                  | Aneurysm ruptured                    | 1     | Obsessive-compulsive personality disorder | Psychiatric disorders                                |
| Renal and urinary disorders                                         | Glomerular vascular disorder         | 1     | Monoparesis                               | Nervous system disorders                             |
| Injury, poisoning and procedural complications                      | Scrotal haematoma                    | 1     | Ureteric obstruction                      | Renal and urinary disorders                          |
| Nervous system disorders                                            | Lacunar infarction                   | 1     | Gingival infection                        | Infections and infestations                          |
| Nervous system disorders                                            | Subarachnoid haemorrhage neonatal    | 1     | Epidermolysis bullosa                     | Congenital, familial and genetic disorders           |
| Infections and infestations                                         | Systemic candida                     | 1     | Pseudomonal sepsis                        | Infections and infestations                          |
| Nervous system disorders                                            | Poor quality sleep                   | 1     | Pelvic infection                          | Infections and infestations                          |
| Reproductive system and breast disorders                            | Spontaneous penile erection          | 1     | Mastication disorder                      | Nervous system disorders                             |
| Neoplasms benign, malignant and unspecified (incl cysts and polyps) | Prolactinoma                         | 1     | Congenital joint malformation             | Congenital, familial and genetic disorders           |
| Neoplasms benign, malignant and unspecified (incl cysts and polyps) | Gastrointestinal stromal tumour      | 1     | Pelvic peritoneal adhesions               | Reproductive system and breast disorders             |
| Psychiatric disorders                                               | Hallucination, tactile               | 1     | Scratch                                   | Injury, poisoning and procedural complications       |

| Basis data for network                                              |                                     |       |                                               |                                                                     |
|---------------------------------------------------------------------|-------------------------------------|-------|-----------------------------------------------|---------------------------------------------------------------------|
| SOC1                                                                | AE1                                 | score | AE2                                           | SOC2                                                                |
| Injury, poisoning and procedural complications                      | Pneumoconiosis                      | 1     | CSF protein increased                         | Investigations                                                      |
| Hepatobiliary disorders                                             | Budd-Chiari syndrome                | 1     | Factor V deficiency                           | Congenital, familial and genetic disorders                          |
| Neoplasms benign, malignant and unspecified (incl cysts and polyps) | Lung adenocarcinoma                 | 1     | Blood uric acid                               | Investigations                                                      |
| Infections and infestations                                         | Enterocolitis infectious            | 1     | Troponin increased                            | Investigations                                                      |
| Congenital, familial and genetic disorders                          | Hyperreflexia                       | 1     | Parathyroid gland enlargement                 | Endocrine disorders                                                 |
| Psychiatric disorders                                               | Abulia                              | 1     | Pseudocyst                                    | General disorders and administration site conditions                |
| Congenital, familial and genetic disorders                          | Clinodactyly                        | 1     | Abulia                                        | Psychiatric disorders                                               |
| Injury, poisoning and procedural complications                      | Self mutilation                     | 1     | Suspiciousness                                | Psychiatric disorders                                               |
| Injury, poisoning and procedural complications                      | Anal injury                         | 1     | Febrile convulsion                            | Nervous system disorders                                            |
| Nervous system disorders                                            | Parkinsonian rest tremor            | 1     | Dizziness exertional                          | Nervous system disorders                                            |
| Renal and urinary disorders                                         | Urethral syndrome                   | 1     | Nasopharyngeal cancer                         | Neoplasms benign, malignant and unspecified (incl cysts and polyps) |
| Gastrointestinal disorders                                          | Glossoptosis                        | 1     | Gingival swelling                             | Gastrointestinal disorders                                          |
| Congenital, familial and genetic disorders                          | Congenital multiplex arthrogryposis | 1     | Postpartum haemorrhage                        | Pregnancy, puerperium and perinatal conditions                      |
| Nervous system disorders                                            | Tongue biting                       | 1     | Electrocardiogram R on T phenomenon           | Investigations                                                      |
| Psychiatric disorders                                               | Hallucination, tactile              | 1     | Spontaneous penile erection                   | Reproductive system and breast disorders                            |
| Nervous system disorders                                            | Migraine with aura                  | 1     | Spine malformation                            | Congenital, familial and genetic disorders                          |
| Eye disorders                                                       | Tear discolouration                 | 1     | Blood 1,25-dihydroxycholecalciferol decreased | Investigations                                                      |
| Congenital, familial and genetic disorders                          | Congenital great vessel anomaly     | 1     | Lower respiratory tract inflammation          | Respiratory, thoracic and mediastinal disorders                     |
| Eye disorders                                                       | Lid margin discharge                | 1     | Conjunctival ulcer                            | Eye disorders                                                       |
| Neoplasms benign, malignant and unspecified (incl cysts and polyps) | Laryngeal neoplasm                  | 1     | Spine malformation                            | Congenital, familial and genetic disorders                          |

| Basis data for network                                              |                                      |       |                                |                                                                     |
|---------------------------------------------------------------------|--------------------------------------|-------|--------------------------------|---------------------------------------------------------------------|
| SOC1                                                                | AE1                                  | score | AE2                            | SOC2                                                                |
| Neoplasms benign, malignant and unspecified (incl cysts and polyps) | Prolactinoma                         | 1     | Pituitary tumour               | Neoplasms benign, malignant and unspecified (incl cysts and polyps) |
| Gastrointestinal disorders                                          | Rectal polyp                         | 1     | Blood growth hormone abnormal  | Investigations                                                      |
| Cardiac disorders                                                   | Bradycardia neonatal                 | 1     | Osteitis deformans             | Musculoskeletal and connective tissue disorders                     |
| Gastrointestinal disorders                                          | Lip haemorrhage                      | 1     | Neck mass                      | Musculoskeletal and connective tissue disorders                     |
| Gastrointestinal disorders                                          | Painful defaecation                  | 1     | Papilloma                      | Neoplasms benign, malignant and unspecified (incl cysts and polyps) |
| Infections and infestations                                         | Helicobacter infection               | 1     | Joint ankylosis                | Musculoskeletal and connective tissue disorders                     |
| Investigations                                                      | White blood cell morphology abnormal | 1     | Bone marrow myelogram abnormal | Investigations                                                      |
| Neoplasms benign, malignant and unspecified (incl cysts and polyps) | Tumour necrosis                      | 1     | Arterial haemorrhage           | Vascular disorders                                                  |
| Nervous system disorders                                            | Mastication disorder                 | 1     | Mendelson's syndrome           | Respiratory, thoracic and mediastinal disorders                     |
| Nervous system disorders                                            | Lacunar infarction                   | 1     | Helicobacter infection         | Infections and infestations                                         |
| Respiratory, thoracic and mediastinal disorders                     | Pneumomediastinum                    | 1     | Nose deformity                 | Musculoskeletal and connective tissue disorders                     |
| Psychiatric disorders                                               | Hallucination, tactile               | 1     | Flat affect                    | Psychiatric disorders                                               |
| Infections and infestations                                         | Scrotal infection                    | 1     | Ureteric obstruction           | Renal and urinary disorders                                         |
| Musculoskeletal and connective tissue disorders                     | Coccydynia                           | 1     | Spontaneous penile erection    | Reproductive system and breast disorders                            |
| Injury, poisoning and procedural complications                      | Scratch                              | 1     | Suspiciousness                 | Psychiatric disorders                                               |
| Neoplasms benign, malignant and unspecified (incl cysts and polyps) | Rectal neoplasm                      | 1     | Intervertebral disc disorder   | Musculoskeletal and connective tissue disorders                     |
| Infections and infestations                                         | Haemophilus sepsis                   | 1     | Pulmonary tuberculosis         | Infections and infestations                                         |
| Reproductive system and breast disorders                            | Spontaneous penile erection          | 1     | Intention tremor               | Nervous system disorders                                            |
| Psychiatric disorders                                               | Sleep attacks                        | 1     | Allergic sinusitis             | Respiratory, thoracic and mediastinal disorders                     |
| Neoplasms benign, malignant and unspecified (incl cysts and polyps) | Glioblastoma multiforme              | 1     | Dermoid cyst of ovary          | Congenital, familial and genetic disorders                          |

| Basis data for network                                              |                                           |       |                                                           |                                                                     |
|---------------------------------------------------------------------|-------------------------------------------|-------|-----------------------------------------------------------|---------------------------------------------------------------------|
| SOC1                                                                | AE1                                       | score | AE2                                                       | SOC2                                                                |
| Investigations                                                      | Urinary sediment abnormal                 | 1     | Lipomatosis                                               | Metabolism and nutrition disorders                                  |
| Gastrointestinal disorders                                          | Pancreatic pseudocyst                     | 1     | Epstein-Barr virus infection                              | Infections and infestations                                         |
| Infections and infestations                                         | Abscess of salivary gland                 | 1     | Food poisoning                                            | Gastrointestinal disorders                                          |
| Neoplasms benign, malignant and unspecified (incl cysts and polyps) | Biliary neoplasm                          | 1     | Renal abscess                                             | Infections and infestations                                         |
| Musculoskeletal and connective tissue disorders                     | Low turnover osteopathy                   | 1     | Hyperreflexia                                             | Congenital, familial and genetic disorders                          |
| Eye disorders                                                       | Madarosis                                 | 1     | Supernumerary nipple                                      | Congenital, familial and genetic disorders                          |
| Infections and infestations                                         | Streptococcal infection                   | 1     | Ligament sprain                                           | Injury, poisoning and procedural complications                      |
| Musculoskeletal and connective tissue disorders                     | Tendon calcification                      | 1     | Acne fulminans                                            | Skin and subcutaneous tissue disorders                              |
| Investigations                                                      | Alpha-1 anti-trypsin increased            | 1     | Ceruloplasmin increased                                   | Investigations                                                      |
| Investigations                                                      | Protein urine                             | 1     | Sleep paralysis                                           | Nervous system disorders                                            |
| Musculoskeletal and connective tissue disorders                     | Intervertebral disc space narrowing       | 1     | Haptoglobin increased                                     | Investigations                                                      |
| Investigations                                                      | Electrocardiogram poor R-wave progression | 1     | Chronic inflammatory demyelinating polyradiculoneuropathy | Nervous system disorders                                            |
| Psychiatric disorders                                               | Flat affect                               | 1     | Dizziness exertional                                      | Nervous system disorders                                            |
| Investigations                                                      | Drug level increased                      | 1     | Lobar pneumonia                                           | Infections and infestations                                         |
| Congenital, familial and genetic disorders                          | Spine malformation                        | 1     | Gastrointestinal stromal tumour                           | Neoplasms benign, malignant and unspecified (incl cysts and polyps) |
| General disorders and administration site conditions                | Instillation site pain                    | 1     | Chemical eye injury                                       | Injury, poisoning and procedural complications                      |
| Congenital, familial and genetic disorders                          | Congenital brain damage                   | 1     | Nose deformity                                            | Musculoskeletal and connective tissue disorders                     |
| Investigations                                                      | Antimitochondrial antibody                | 1     | Myopathy toxic                                            | Musculoskeletal and connective tissue disorders                     |
| Infections and infestations                                         | Tinea versicolour                         | 1     | Aortic valve stenosis                                     | Cardiac disorders                                                   |
| General disorders and administration site conditions                | Infusion site warmth                      | 1     | Subdural haemorrhage                                      | Injury, poisoning and procedural complications                      |

| Basis data for network                                              |                                               |       |                                               |                                                      |
|---------------------------------------------------------------------|-----------------------------------------------|-------|-----------------------------------------------|------------------------------------------------------|
| SOC1                                                                | AE1                                           | score | AE2                                           | SOC2                                                 |
| Gastrointestinal disorders                                          | Toxic dilatation of intestine                 | 1     | Chest wall mass                               | Musculoskeletal and connective tissue disorders      |
| Respiratory, thoracic and mediastinal disorders                     | Lower respiratory tract inflammation          | 1     | Hypertelorism of orbit                        | Congenital, familial and genetic disorders           |
| Investigations                                                      | Blood 1,25-dihydroxycholecalciferol decreased | 1     | Urine vitamin K decreased                     | Investigations                                       |
| Infections and infestations                                         | Onchocerciasis                                | 1     | Choroiditis                                   | Eye disorders                                        |
| Musculoskeletal and connective tissue disorders                     | Joint ankylosis                               | 1     | Sickle cell anaemia                           | Congenital, familial and genetic disorders           |
| Injury, poisoning and procedural complications                      | Self mutilation                               | 1     | Coccydynia                                    | Musculoskeletal and connective tissue disorders      |
| Neoplasms benign, malignant and unspecified (incl cysts and polyps) | Bile duct cancer                              | 1     | Pseudomonas sepsis                            | Infections and infestations                          |
| Investigations                                                      | Bilirubin urine                               | 1     | Pseudomonas sepsis                            | Infections and infestations                          |
| Respiratory, thoracic and mediastinal disorders                     | Pleural rub                                   | 1     | Implant expulsion                             | General disorders and administration site conditions |
| Injury, poisoning and procedural complications                      | Self mutilation                               | 1     | Intention tremor                              | Nervous system disorders                             |
| Musculoskeletal and connective tissue disorders                     | Back disorder                                 | 1     | Grimacing                                     | Nervous system disorders                             |
| Nervous system disorders                                            | Neuralgic amyotrophy                          | 1     | Lennox-Gastaut syndrome                       | Nervous system disorders                             |
| Neoplasms benign, malignant and unspecified (incl cysts and polyps) | Lymphoma cutis                                | 1     | Haptoglobin increased                         | Investigations                                       |
| Skin and subcutaneous tissue disorders                              | Red man syndrome                              | 1     | Blood 1,25-dihydroxycholecalciferol decreased | Investigations                                       |
| Nervous system disorders                                            | Poor quality sleep                            | 1     | Painful erection                              | Reproductive system and breast disorders             |
| Musculoskeletal and connective tissue disorders                     | Neck mass                                     | 1     | Blood glucose fluctuation                     | Investigations                                       |
| Investigations                                                      | PCO2 increased                                | 1     | Secretion discharge                           | General disorders and administration site conditions |
| Nervous system disorders                                            | Cerebral haematoma                            | 1     | Back disorder                                 | Musculoskeletal and connective tissue disorders      |
| Neoplasms benign, malignant and unspecified (incl cysts and polyps) | Bile duct cancer                              | 1     | Bacterial sepsis                              | Infections and infestations                          |
| Injury, poisoning and procedural complications                      | Self mutilation                               | 1     | Dizziness exertional                          | Nervous system disorders                             |



| Basis data for network                          |                                       |       |                                 |                                                                     |
|-------------------------------------------------|---------------------------------------|-------|---------------------------------|---------------------------------------------------------------------|
| SOC1                                            | AE1                                   | score | AE2                             | SOC2                                                                |
| Skin and subcutaneous tissue disorders          | Purpura senile                        | 1     | Cartilage injury                | Injury, poisoning and procedural complications                      |
| Infections and infestations                     | Bacterial sepsis                      | 1     | Bilirubin urine                 | Investigations                                                      |
| Investigations                                  | White blood cell count                | 1     | Pseudomonal sepsis              | Infections and infestations                                         |
| Investigations                                  | Lipoprotein (a) decreased             | 1     | Apolipoprotein B decreased      | Investigations                                                      |
| Injury, poisoning and procedural complications  | Rib fracture                          | 1     | Urine calcium decreased         | Investigations                                                      |
| Congenital, familial and genetic disorders      | Keratosis follicular                  | 1     | Low turnover osteopathy         | Musculoskeletal and connective tissue disorders                     |
| Investigations                                  | Coagulation factor IX level increased | 1     | Ceruloplasmin increased         | Investigations                                                      |
| Congenital, familial and genetic disorders      | Sickle cell anaemia with crisis       | 1     | Parathyroid tumour              | Neoplasms benign, malignant and unspecified (incl cysts and polyps) |
| Reproductive system and breast disorders        | Scrotal ulcer                         | 1     | Congenital great vessel anomaly | Congenital, familial and genetic disorders                          |
| Renal and urinary disorders                     | Glomerular vascular disorder          | 1     | Gastroesophagitis               | Gastrointestinal disorders                                          |
| Endocrine disorders                             | Oestrogen deficiency                  | 1     | Blood glucose fluctuation       | Investigations                                                      |
| Nervous system disorders                        | Mastication disorder                  | 1     | Scratch                         | Injury, poisoning and procedural complications                      |
| Investigations                                  | White blood cell count                | 1     | Metastases to lung              | Neoplasms benign, malignant and unspecified (incl cysts and polyps) |
| Cardiac disorders                               | Dressler's syndrome                   | 1     | Proctitis haemorrhagic          | Gastrointestinal disorders                                          |
| Infections and infestations                     | Gingival infection                    | 1     | Parathyroid tumour              | Neoplasms benign, malignant and unspecified (incl cysts and polyps) |
| Injury, poisoning and procedural complications  | Scratch                               | 1     | Intention tremor                | Nervous system disorders                                            |
| Infections and infestations                     | Systemic candida                      | 1     | Metastases to lung              | Neoplasms benign, malignant and unspecified (incl cysts and polyps) |
| Investigations                                  | Vitamin D decreased                   | 1     | Lung adenocarcinoma             | Neoplasms benign, malignant and unspecified (incl cysts and polyps) |
| Musculoskeletal and connective tissue disorders | Fasciitis                             | 1     | Proctitis ulcerative            | Gastrointestinal disorders                                          |
| Metabolism and nutrition disorders              | Hyperproteinaemia                     | 1     | Globulins decreased             | Investigations                                                      |

| Basis data for network                                              |                                 |       |                                       |                                                                     |
|---------------------------------------------------------------------|---------------------------------|-------|---------------------------------------|---------------------------------------------------------------------|
| SOC1                                                                | AE1                             | score | AE2                                   | SOC2                                                                |
| Congenital, familial and genetic disorders                          | Keratosis follicular            | 1     | Aortic valve stenosis                 | Cardiac disorders                                                   |
| Respiratory, thoracic and mediastinal disorders                     | Retinoic acid syndrome          | 1     | Optic nerve hypoplasia                | Congenital, familial and genetic disorders                          |
| Infections and infestations                                         | Streptococcal infection         | 1     | Traumatic fracture                    | Injury, poisoning and procedural complications                      |
| Gastrointestinal disorders                                          | Mallory-Weiss syndrome          | 1     | Hepatic vein thrombosis               | Hepatobiliary disorders                                             |
| Injury, poisoning and procedural complications                      | Femur fracture                  | 1     | Cold agglutinins positive             | Investigations                                                      |
| Injury, poisoning and procedural complications                      | Self mutilation                 | 1     | Hallucination, tactile                | Psychiatric disorders                                               |
| Pregnancy, puerperium and perinatal conditions                      | Ruptured ectopic pregnancy      | 1     | Parametritis                          | Infections and infestations                                         |
| Investigations                                                      | Spermatozoa morphology abnormal | 1     | Congenital genital malformation male  | Congenital, familial and genetic disorders                          |
| Psychiatric disorders                                               | Blunted affect                  | 1     | Buttock pain                          | Musculoskeletal and connective tissue disorders                     |
| Infections and infestations                                         | Tinea versicolour               | 1     | Parathyroid tumour benign             | Neoplasms benign, malignant and unspecified (incl cysts and polyps) |
| Neoplasms benign, malignant and unspecified (incl cysts and polyps) | Acute lymphocytic leukaemia     | 1     | Abortion complete                     | Pregnancy, puerperium and perinatal conditions                      |
| Musculoskeletal and connective tissue disorders                     | Joint ankylosis                 | 1     | Gingival infection                    | Infections and infestations                                         |
| Congenital, familial and genetic disorders                          | Alkaptonuria                    | 1     | Occult blood                          | Investigations                                                      |
| General disorders and administration site conditions                | Submandibular mass              | 1     | Periodontal destruction               | Infections and infestations                                         |
| Reproductive system and breast disorders                            | Uterine cervical laceration     | 1     | Uterine rupture                       | Injury, poisoning and procedural complications                      |
| General disorders and administration site conditions                | Catheter site erythema          | 1     | Mycobacterium avium complex infection | Infections and infestations                                         |
| Injury, poisoning and procedural complications                      | Fluorosis                       | 1     | Postoperative fever                   | Injury, poisoning and procedural complications                      |
| Nervous system disorders                                            | Dizziness exertional            | 1     | Scratch                               | Injury, poisoning and procedural complications                      |
| Congenital, familial and genetic disorders                          | Sickle cell anaemia             | 1     | Lacunar infarction                    | Nervous system disorders                                            |
| Neoplasms benign, malignant and unspecified (incl cysts and polyps) | Metastases to lung              | 1     | Pseudomonal sepsis                    | Infections and infestations                                         |

| Basis data for network                                              |                                           |       |                                     |                                                                     |
|---------------------------------------------------------------------|-------------------------------------------|-------|-------------------------------------|---------------------------------------------------------------------|
| SOC1                                                                | AE1                                       | score | AE2                                 | SOC2                                                                |
| Nervous system disorders                                            | Median nerve lesion                       | 1     | Purpura senile                      | Skin and subcutaneous tissue disorders                              |
| Musculoskeletal and connective tissue disorders                     | Tendon calcification                      | 1     | Optic nerve hypoplasia              | Congenital, familial and genetic disorders                          |
| Infections and infestations                                         | Helicobacter infection                    | 1     | Gingival infection                  | Infections and infestations                                         |
| General disorders and administration site conditions                | Infusion site warmth                      | 1     | Fungal rash                         | Infections and infestations                                         |
| Infections and infestations                                         | Pseudomonas infection                     | 1     | Catheter site erythema              | General disorders and administration site conditions                |
| Infections and infestations                                         | Epstein-Barr virus infection              | 1     | Bullous impetigo                    | Infections and infestations                                         |
| Neoplasms benign, malignant and unspecified (incl cysts and polyps) | Lymphoma cutis                            | 1     | Intervertebral disc space narrowing | Musculoskeletal and connective tissue disorders                     |
| Investigations                                                      | White blood cell count                    | 1     | Systemic candida                    | Infections and infestations                                         |
| Hepatobiliary disorders                                             | Biliary dilatation                        | 1     | Microlithiasis                      | General disorders and administration site conditions                |
| Investigations                                                      | Blood creatine phosphokinase MM increased | 1     | Shock haemorrhagic                  | Vascular disorders                                                  |
| Nervous system disorders                                            | Atonic seizures                           | 1     | Oligodipsia                         | Metabolism and nutrition disorders                                  |
| Infections and infestations                                         | Bacterial sepsis                          | 1     | Systemic candida                    | Infections and infestations                                         |
| Psychiatric disorders                                               | Flat affect                               | 1     | Coccydynia                          | Musculoskeletal and connective tissue disorders                     |
| Investigations                                                      | Ceruloplasmin increased                   | 1     | Vaginal cancer                      | Neoplasms benign, malignant and unspecified (incl cysts and polyps) |
| Injury, poisoning and procedural complications                      | Scratch                                   | 1     | Coccydynia                          | Musculoskeletal and connective tissue disorders                     |
| Pregnancy, puerperium and perinatal conditions                      | Retained placenta or membranes            | 1     | Congenital cerebral cyst            | Congenital, familial and genetic disorders                          |
| Investigations                                                      | Glycosylated haemoglobin increased        | 1     | Blunted affect                      | Psychiatric disorders                                               |
| Skin and subcutaneous tissue disorders                              | Acne fulminans                            | 1     | Optic nerve hypoplasia              | Congenital, familial and genetic disorders                          |
| Psychiatric disorders                                               | Flat affect                               | 1     | Intention tremor                    | Nervous system disorders                                            |
| Neoplasms benign, malignant and unspecified (incl cysts and polyps) | Acanthoma                                 | 1     | Lymphomatoid papulosis              | Skin and subcutaneous tissue disorders                              |

| Basis data for network                                              |                                      |       |                                    |                                                      |
|---------------------------------------------------------------------|--------------------------------------|-------|------------------------------------|------------------------------------------------------|
| SOC1                                                                | AE1                                  | score | AE2                                | SOC2                                                 |
| Musculoskeletal and connective tissue disorders                     | Buttock pain                         | 1     | Mendelson's syndrome               | Respiratory, thoracic and mediastinal disorders      |
| Neoplasms benign, malignant and unspecified (incl cysts and polyps) | Parathyroid tumour                   | 1     | Joint ankylosis                    | Musculoskeletal and connective tissue disorders      |
| Vascular disorders                                                  | Post thrombotic syndrome             | 1     | Injection site hypersensitivity    | General disorders and administration site conditions |
| Respiratory, thoracic and mediastinal disorders                     | Laryngeal obstruction                | 1     | Nasal mucosa atrophy               | Respiratory, thoracic and mediastinal disorders      |
| Musculoskeletal and connective tissue disorders                     | Tendon calcification                 | 1     | Asthma exercise induced            | Respiratory, thoracic and mediastinal disorders      |
| Infections and infestations                                         | Enterococcal bacteraemia             | 1     | Candida sepsis                     | Infections and infestations                          |
| Investigations                                                      | Blood antidiuretic hormone decreased | 1     | Purple glove syndrome              | Musculoskeletal and connective tissue disorders      |
| Investigations                                                      | Blood oestrogen increased            | 1     | Encephalitis herpes                | Infections and infestations                          |
| Metabolism and nutrition disorders                                  | Oligodipsia                          | 1     | Urinary tract pain                 | Renal and urinary disorders                          |
| Investigations                                                      | White blood cells urine              | 1     | Thymus hypoplasia                  | Congenital, familial and genetic disorders           |
| Infections and infestations                                         | Mucocutaneous candidiasis            | 1     | Allergy to chemicals               | Immune system disorders                              |
| General disorders and administration site conditions                | Abasia                               | 1     | Self mutilation                    | Injury, poisoning and procedural complications       |
| General disorders and administration site conditions                | Application site scar                | 1     | Application site discolouration    | General disorders and administration site conditions |
| Respiratory, thoracic and mediastinal disorders                     | Retinoic acid syndrome               | 1     | Congenital great vessel anomaly    | Congenital, familial and genetic disorders           |
| Metabolism and nutrition disorders                                  | Sucrose intolerance                  | 1     | Biopsy foetal abnormal             | Investigations                                       |
| Neoplasms benign, malignant and unspecified (incl cysts and polyps) | Parathyroid tumour                   | 1     | Lacunar infarction                 | Nervous system disorders                             |
| Injury, poisoning and procedural complications                      | Wrist fracture                       | 1     | Lower gastrointestinal haemorrhage | Gastrointestinal disorders                           |
| Neoplasms benign, malignant and unspecified (incl cysts and polyps) | Bowen's disease                      | 1     | Skin dystrophy                     | Skin and subcutaneous tissue disorders               |
| Neoplasms benign, malignant and unspecified (incl cysts and polyps) | Throat cancer                        | 1     | Testis discomfort                  | Reproductive system and breast disorders             |
| Neoplasms benign, malignant and unspecified (incl cysts and polyps) | Prolactinoma                         | 1     | Dwarfism                           | Musculoskeletal and connective tissue disorders      |

| Basis data for network                          |                                   |       |                                              |                                                                     |
|-------------------------------------------------|-----------------------------------|-------|----------------------------------------------|---------------------------------------------------------------------|
| SOC1                                            | AE1                               | score | AE2                                          | SOC2                                                                |
| Nervous system disorders                        | Parkinsonian rest tremor          | 1     | Buttock pain                                 | Musculoskeletal and connective tissue disorders                     |
| Nervous system disorders                        | Sleep paralysis                   | 1     | Sudden onset of sleep                        | Nervous system disorders                                            |
| Congenital, familial and genetic disorders      | Congenital bladder anomaly        | 1     | Congenital multiplex arthrogryposis          | Congenital, familial and genetic disorders                          |
| Injury, poisoning and procedural complications  | Delayed recovery from anaesthesia | 1     | Trance                                       | Psychiatric disorders                                               |
| Endocrine disorders                             | Pituitary haemorrhage             | 1     | Bladder papilloma                            | Neoplasms benign, malignant and unspecified (incl cysts and polyps) |
| Congenital, familial and genetic disorders      | Supernumerary nipple              | 1     | Intervertebral disc space narrowing          | Musculoskeletal and connective tissue disorders                     |
| Metabolism and nutrition disorders              | Hypoglycaemia unawareness         | 1     | Pneumonia primary atypical                   | Infections and infestations                                         |
| Infections and infestations                     | Diarrhoea infectious              | 1     | Painful defaecation                          | Gastrointestinal disorders                                          |
| Cardiac disorders                               | Coronary artery dissection        | 1     | Cerebral haemorrhage foetal                  | Nervous system disorders                                            |
| Gastrointestinal disorders                      | Oesophageal obstruction           | 1     | Urethral obstruction                         | Renal and urinary disorders                                         |
| Injury, poisoning and procedural complications  | Anal injury                       | 1     | Gingival ulceration                          | Gastrointestinal disorders                                          |
| Congenital, familial and genetic disorders      | Congenital hydrocephalus          | 1     | Congenital cerebral cyst                     | Congenital, familial and genetic disorders                          |
| Reproductive system and breast disorders        | Testis discomfort                 | 1     | Injection site paraesthesia                  | General disorders and administration site conditions                |
| Infections and infestations                     | Trichomoniasis                    | 1     | Biopsy endometrium                           | Investigations                                                      |
| Respiratory, thoracic and mediastinal disorders | Allergic sinusitis                | 1     | Protein urine                                | Investigations                                                      |
| Eye disorders                                   | Ocular myasthenia                 | 1     | Glucose-6-phosphate dehydrogenase deficiency | Congenital, familial and genetic disorders                          |
| Respiratory, thoracic and mediastinal disorders | Mendelson's syndrome              | 1     | Glycosylated haemoglobin increased           | Investigations                                                      |
| Nervous system disorders                        | Diabetic neuropathy               | 1     | Diabetic vascular disorder                   | Vascular disorders                                                  |
| Nervous system disorders                        | Locked-in syndrome                | 1     | Epstein-Barr virus infection                 | Infections and infestations                                         |
| Infections and infestations                     | Creutzfeldt-Jakob disease         | 1     | Parathyroid gland enlargement                | Endocrine disorders                                                 |

| Basis data for network                                              |                            |       |                                            |                                                      |
|---------------------------------------------------------------------|----------------------------|-------|--------------------------------------------|------------------------------------------------------|
| SOC1                                                                | AE1                        | score | AE2                                        | SOC2                                                 |
| General disorders and administration site conditions                | Pseudocyst                 | 1     | Cerebral palsy                             | Congenital, familial and genetic disorders           |
| Cardiac disorders                                                   | Restrictive cardiomyopathy | 1     | Transient psychosis                        | Psychiatric disorders                                |
| Gastrointestinal disorders                                          | Vomiting neonatal          | 1     | Neonatal infection                         | Infections and infestations                          |
| Infections and infestations                                         | Periodontal destruction    | 1     | Hyperproteinaemia                          | Metabolism and nutrition disorders                   |
| Investigations                                                      | White blood cells urine    | 1     | Congenital great vessel anomaly            | Congenital, familial and genetic disorders           |
| Metabolism and nutrition disorders                                  | Diet refusal               | 1     | Dizziness exertional                       | Nervous system disorders                             |
| Investigations                                                      | Haemoglobin                | 1     | Lobar pneumonia                            | Infections and infestations                          |
| Psychiatric disorders                                               | Suspiciousness             | 1     | Parkinsonian rest tremor                   | Nervous system disorders                             |
| Psychiatric disorders                                               | Sleep attacks              | 1     | Sensation of foreign body                  | General disorders and administration site conditions |
| Infections and infestations                                         | Salpingo-oophoritis        | 1     | Urea urine increased                       | Investigations                                       |
| Infections and infestations                                         | Fungal rash                | 1     | Myelocyte count increased                  | Investigations                                       |
| Nervous system disorders                                            | Delayed sleep phase        | 1     | Stereotypy                                 | Psychiatric disorders                                |
| Injury, poisoning and procedural complications                      | Self mutilation            | 1     | Scratch                                    | Injury, poisoning and procedural complications       |
| Neoplasms benign, malignant and unspecified (incl cysts and polyps) | Parathyroid tumour benign  | 1     | Hyperreflexia                              | Congenital, familial and genetic disorders           |
| Infections and infestations                                         | Eczema infected            | 1     | Herpetic stomatitis                        | Infections and infestations                          |
| Musculoskeletal and connective tissue disorders                     | Coccydynia                 | 1     | Diet refusal                               | Metabolism and nutrition disorders                   |
| Respiratory, thoracic and mediastinal disorders                     | Pharyngeal polyp           | 1     | Myringitis                                 | Infections and infestations                          |
| Investigations                                                      | Protein C increased        | 1     | Von Willebrand's factor multimers abnormal | Investigations                                       |
| Infections and infestations                                         | Pharyngeal candidiasis     | 1     | Pharyngeal polyp                           | Respiratory, thoracic and mediastinal disorders      |
| Nervous system disorders                                            | Intention tremor           | 1     | Diet refusal                               | Metabolism and nutrition disorders                   |

| Basis data for network                                              |                                      |       |                                           |                                                                     |
|---------------------------------------------------------------------|--------------------------------------|-------|-------------------------------------------|---------------------------------------------------------------------|
| SOC1                                                                | AE1                                  | score | AE2                                       | SOC2                                                                |
| Nervous system disorders                                            | Spinal cord paralysis                | 1     | Respiratory sighs                         | General disorders and administration site conditions                |
| Psychiatric disorders                                               | Hallucination, tactile               | 1     | Mendelson's syndrome                      | Respiratory, thoracic and mediastinal disorders                     |
| Investigations                                                      | Glycosylated haemoglobin decreased   | 1     | Blood creatine phosphokinase MB increased | Investigations                                                      |
| Respiratory, thoracic and mediastinal disorders                     | Tonsillar disorder                   | 1     | Breast cancer female                      | Neoplasms benign, malignant and unspecified (incl cysts and polyps) |
| Neoplasms benign, malignant and unspecified (incl cysts and polyps) | Prolactinoma                         | 1     | Malignant hydatidiform mole               | Neoplasms benign, malignant and unspecified (incl cysts and polyps) |
| Renal and urinary disorders                                         | Paroxysmal nocturnal haemoglobinuria | 1     | Red blood cell vacuolisation              | Blood and lymphatic system disorders                                |
| Nervous system disorders                                            | Migraine with aura                   | 1     | Laryngeal neoplasm                        | Neoplasms benign, malignant and unspecified (incl cysts and polyps) |
| Nervous system disorders                                            | Sudden onset of sleep                | 1     | Allergic sinusitis                        | Respiratory, thoracic and mediastinal disorders                     |
| Congenital, familial and genetic disorders                          | Spine malformation                   | 1     | Anaplastic thyroid cancer                 | Neoplasms benign, malignant and unspecified (incl cysts and polyps) |
| Skin and subcutaneous tissue disorders                              | Acne fulminans                       | 1     | Asthma exercise induced                   | Respiratory, thoracic and mediastinal disorders                     |
| Injury, poisoning and procedural complications                      | Periorbital haematoma                | 1     | Blood creatine phosphokinase MB increased | Investigations                                                      |
| Infections and infestations                                         | Pelvic abscess                       | 1     | Injection site pustule                    | Infections and infestations                                         |
| Infections and infestations                                         | Neonatal infection                   | 1     | Neonatal tachypnoea                       | Respiratory, thoracic and mediastinal disorders                     |
| Vascular disorders                                                  | Diabetic vascular disorder           | 1     | Acute sinusitis                           | Infections and infestations                                         |
| Nervous system disorders                                            | Mastication disorder                 | 1     | Diet refusal                              | Metabolism and nutrition disorders                                  |
| Respiratory, thoracic and mediastinal disorders                     | Tonsillar disorder                   | 1     | Oral infection                            | Infections and infestations                                         |
| Nervous system disorders                                            | Migraine with aura                   | 1     | Blood acid phosphatase increased          | Investigations                                                      |
| Psychiatric disorders                                               | Perseveration                        | 1     | Delayed recovery from anaesthesia         | Injury, poisoning and procedural complications                      |
| Investigations                                                      | Venous pressure decreased            | 1     | Benign familial haematuria                | Congenital, familial and genetic disorders                          |
| General disorders and administration site conditions                | Infusion site warmth                 | 1     | Pelvic abscess                            | Infections and infestations                                         |

| Basis data for network                                              |                           |       |                                    |                                                                     |
|---------------------------------------------------------------------|---------------------------|-------|------------------------------------|---------------------------------------------------------------------|
| SOC1                                                                | AE1                       | score | AE2                                | SOC2                                                                |
| Neoplasms benign, malignant and unspecified (incl cysts and polyps) | Breast cancer female      | 1     | Lower gastrointestinal haemorrhage | Gastrointestinal disorders                                          |
| Blood and lymphatic system disorders                                | Myeloid maturation arrest | 1     | Aura                               | Nervous system disorders                                            |
| General disorders and administration site conditions                | Pseudocyst                | 1     | Hyperhomocysteinaemia              | Metabolism and nutrition disorders                                  |
| Investigations                                                      | Myelocyte count increased | 1     | Subdural haemorrhage               | Injury, poisoning and procedural complications                      |
| Neoplasms benign, malignant and unspecified (incl cysts and polyps) | Laryngeal neoplasm        | 1     | Blood acid phosphatase increased   | Investigations                                                      |
| Musculoskeletal and connective tissue disorders                     | Scoliosis                 | 1     | Posterior capsule opacification    | Eye disorders                                                       |
| Congenital, familial and genetic disorders                          | Clinodactyly              | 1     | Hyperhomocysteinaemia              | Metabolism and nutrition disorders                                  |
| Infections and infestations                                         | Candida sepsis            | 1     | Escherichia bacteraemia            | Infections and infestations                                         |
| Respiratory, thoracic and mediastinal disorders                     | Retinoic acid syndrome    | 1     | Hypertelorism of orbit             | Congenital, familial and genetic disorders                          |
| Injury, poisoning and procedural complications                      | Anal injury               | 1     | Fasciitis                          | Musculoskeletal and connective tissue disorders                     |
| Investigations                                                      | Vital capacity decreased  | 1     | Bronchial neoplasm                 | Neoplasms benign, malignant and unspecified (incl cysts and polyps) |
| Nervous system disorders                                            | Lacunar infarction        | 1     | Joint ankylosis                    | Musculoskeletal and connective tissue disorders                     |
| Neoplasms benign, malignant and unspecified (incl cysts and polyps) | Lung adenocarcinoma       | 1     | Gastritis alcoholic                | Gastrointestinal disorders                                          |
| Metabolism and nutrition disorders                                  | Diet refusal              | 1     | Periorbital haematoma              | Injury, poisoning and procedural complications                      |
| Infections and infestations                                         | Blastomycosis             | 1     | Leukaemia cutis                    | Neoplasms benign, malignant and unspecified (incl cysts and polyps) |
| Psychiatric disorders                                               | Flat affect               | 1     | Buttock pain                       | Musculoskeletal and connective tissue disorders                     |
| Neoplasms benign, malignant and unspecified (incl cysts and polyps) | B-cell lymphoma           | 1     | Cerebral atrophy congenital        | Congenital, familial and genetic disorders                          |
| Respiratory, thoracic and mediastinal disorders                     | Hypopnoea                 | 1     | Protein urine                      | Investigations                                                      |
| Nervous system disorders                                            | Dizziness exertional      | 1     | Mendelson's syndrome               | Respiratory, thoracic and mediastinal disorders                     |
| Neoplasms benign, malignant and unspecified (incl cysts and polyps) | Parathyroid tumour        | 1     | Helicobacter infection             | Infections and infestations                                         |



| Basis data for network                                              |                                             |       |                               |                                                                     |
|---------------------------------------------------------------------|---------------------------------------------|-------|-------------------------------|---------------------------------------------------------------------|
| SOC1                                                                | AE1                                         | score | AE2                           | SOC2                                                                |
| Nervous system disorders                                            | Drug withdrawal convulsions                 | 1     | Corneal scar                  | Eye disorders                                                       |
| Neoplasms benign, malignant and unspecified (incl cysts and polyps) | Neurofibroma                                | 1     | Lymphomatoid papulosis        | Skin and subcutaneous tissue disorders                              |
| Respiratory, thoracic and mediastinal disorders                     | Pharyngeal polyp                            | 1     | Herpetic stomatitis           | Infections and infestations                                         |
| Respiratory, thoracic and mediastinal disorders                     | Asthma exercise induced                     | 1     | White blood cells urine       | Investigations                                                      |
| Investigations                                                      | Blood growth hormone abnormal               | 1     | Pleural rub                   | Respiratory, thoracic and mediastinal disorders                     |
| Neoplasms benign, malignant and unspecified (incl cysts and polyps) | Tongue neoplasm malignant stage unspecified | 1     | Pituitary tumour              | Neoplasms benign, malignant and unspecified (incl cysts and polyps) |
| Cardiac disorders                                                   | Aortic valve stenosis                       | 1     | Hyperreflexia                 | Congenital, familial and genetic disorders                          |
| Neoplasms benign, malignant and unspecified (incl cysts and polyps) | Tongue neoplasm malignant stage unspecified | 1     | Congenital joint malformation | Congenital, familial and genetic disorders                          |
| Psychiatric disorders                                               | Suspiciousness                              | 1     | Flat affect                   | Psychiatric disorders                                               |
| Respiratory, thoracic and mediastinal disorders                     | Retinoic acid syndrome                      | 1     | Asthma exercise induced       | Respiratory, thoracic and mediastinal disorders                     |
| Musculoskeletal and connective tissue disorders                     | Coccydynia                                  | 1     | Parkinsonian rest tremor      | Nervous system disorders                                            |
| Blood and lymphatic system disorders                                | Dysglobulinaemia                            | 1     | Metastases to liver           | Neoplasms benign, malignant and unspecified (incl cysts and polyps) |
| Investigations                                                      | Urea urine increased                        | 1     | Diabetic vascular disorder    | Vascular disorders                                                  |
| Psychiatric disorders                                               | Suspiciousness                              | 1     | Spontaneous penile erection   | Reproductive system and breast disorders                            |
| Infections and infestations                                         | Central line infection                      | 1     | Catheter site haemorrhage     | General disorders and administration site conditions                |
| Nervous system disorders                                            | Locked-in syndrome                          | 1     | Gastroesophagitis             | Gastrointestinal disorders                                          |
| Gastrointestinal disorders                                          | Melanosis coli                              | 1     | Clubbing                      | Musculoskeletal and connective tissue disorders                     |
| Respiratory, thoracic and mediastinal disorders                     | Pharyngeal polyp                            | 1     | Aural polyp                   | Ear and labyrinth disorders                                         |
| Nervous system disorders                                            | Intention tremor                            | 1     | Parkinsonian rest tremor      | Nervous system disorders                                            |
| Nervous system disorders                                            | Migraine with aura                          | 1     | Pelvic peritoneal adhesions   | Reproductive system and breast disorders                            |

| Basis data for network                               |                                           |       |                                          |                                                                     |
|------------------------------------------------------|-------------------------------------------|-------|------------------------------------------|---------------------------------------------------------------------|
| SOC1                                                 | AE1                                       | score | AE2                                      | SOC2                                                                |
| Investigations                                       | Computerised tomogram abnormal            | 1     | Proctitis ulcerative                     | Gastrointestinal disorders                                          |
| Psychiatric disorders                                | Flat affect                               | 1     | Glycosylated haemoglobin increased       | Investigations                                                      |
| Nervous system disorders                             | Convulsion neonatal                       | 1     | Cyanosis neonatal                        | Respiratory, thoracic and mediastinal disorders                     |
| Reproductive system and breast disorders             | Pelvic peritoneal adhesions               | 1     | Laryngeal neoplasm                       | Neoplasms benign, malignant and unspecified (incl cysts and polyps) |
| Infections and infestations                          | Bullous impetigo                          | 1     | Monoparesis                              | Nervous system disorders                                            |
| General disorders and administration site conditions | Submandibular mass                        | 1     | Hyperproteinaemia                        | Metabolism and nutrition disorders                                  |
| Infections and infestations                          | Respiratory moniliasis                    | 1     | Peritoneal fibrosis                      | Gastrointestinal disorders                                          |
| Investigations                                       | Anti-platelet antibody positive           | 1     | Adrenal haemorrhage                      | Endocrine disorders                                                 |
| Gastrointestinal disorders                           | Pancreatic pseudocyst                     | 1     | Monoparesis                              | Nervous system disorders                                            |
| Respiratory, thoracic and mediastinal disorders      | Pneumomediastinum                         | 1     | Cerebral haemorrhage foetal              | Nervous system disorders                                            |
| Metabolism and nutrition disorders                   | Diet refusal                              | 1     | Glycosylated haemoglobin decreased       | Investigations                                                      |
| Investigations                                       | Blood creatine phosphokinase MM increased | 1     | International normalised ratio decreased | Investigations                                                      |
| Musculoskeletal and connective tissue disorders      | Coccydynia                                | 1     | Mendelson's syndrome                     | Respiratory, thoracic and mediastinal disorders                     |
| Renal and urinary disorders                          | Urethral syndrome                         | 1     | Brain neoplasm malignant                 | Neoplasms benign, malignant and unspecified (incl cysts and polyps) |
| Vascular disorders                                   | Peripheral circulatory failure            | 1     | Metastases to liver                      | Neoplasms benign, malignant and unspecified (incl cysts and polyps) |
| Investigations                                       | Electrocardiogram PR interval             | 1     | Dysglobulinaemia                         | Blood and lymphatic system disorders                                |
| Eye disorders                                        | Diabetic retinopathy                      | 1     | Neck mass                                | Musculoskeletal and connective tissue disorders                     |
| Musculoskeletal and connective tissue disorders      | Muscle contracture                        | 1     | Eye degenerative disorder                | Eye disorders                                                       |
| Psychiatric disorders                                | Communication disorder                    | 1     | Delayed recovery from anaesthesia        | Injury, poisoning and procedural complications                      |
| Investigations                                       | Blood creatine phosphokinase MM increased | 1     | Spinal cord injury                       | Injury, poisoning and procedural complications                      |

| Basis data for network                          |                                    |       |                                     |                                                                     |
|-------------------------------------------------|------------------------------------|-------|-------------------------------------|---------------------------------------------------------------------|
| SOC1                                            | AE1                                | score | AE2                                 | SOC2                                                                |
| Investigations                                  | Glycosylated haemoglobin increased | 1     | Parkinsonian rest tremor            | Nervous system disorders                                            |
| Respiratory, thoracic and mediastinal disorders | Mendelson's syndrome               | 1     | Intention tremor                    | Nervous system disorders                                            |
| Congenital, familial and genetic disorders      | Fibrous dysplasia of bone          | 1     | Yersinia infection                  | Infections and infestations                                         |
| Psychiatric disorders                           | Hallucination, tactile             | 1     | Parkinsonian rest tremor            | Nervous system disorders                                            |
| Infections and infestations                     | Sweat gland infection              | 1     | Cerebellar atrophy                  | Nervous system disorders                                            |
| Skin and subcutaneous tissue disorders          | Lymphomatoid papulosis             | 1     | Skin dystrophy                      | Skin and subcutaneous tissue disorders                              |
| Hepatobiliary disorders                         | Budd-Chiari syndrome               | 1     | Arterial haemorrhage                | Vascular disorders                                                  |
| Investigations                                  | Computerised tomogram abnormal     | 1     | Anal injury                         | Injury, poisoning and procedural complications                      |
| Nervous system disorders                        | Monoparesis                        | 1     | Diabetes mellitus insulin-dependent | Metabolism and nutrition disorders                                  |
| Psychiatric disorders                           | Asocial behaviour                  | 1     | Blood glucagon increased            | Investigations                                                      |
| Infections and infestations                     | Eczema infected                    | 1     | Aural polyp                         | Ear and labyrinth disorders                                         |
| Gastrointestinal disorders                      | Proctitis ulcerative               | 1     | Gingival ulceration                 | Gastrointestinal disorders                                          |
| Musculoskeletal and connective tissue disorders | Soft tissue disorder               | 1     | Thought blocking                    | Psychiatric disorders                                               |
| Infections and infestations                     | Oral infection                     | 1     | Lower gastrointestinal haemorrhage  | Gastrointestinal disorders                                          |
| Congenital, familial and genetic disorders      | Supernumerary nipple               | 1     | Lymphoma cutis                      | Neoplasms benign, malignant and unspecified (incl cysts and polyps) |
| Congenital, familial and genetic disorders      | Neurofibromatosis                  | 1     | Dermoid cyst of ovary               | Congenital, familial and genetic disorders                          |
| Infections and infestations                     | Enterocolitis infectious           | 1     | Platelet aggregation abnormal       | Investigations                                                      |
| Reproductive system and breast disorders        | Genital lesion                     | 1     | Penile pain                         | Reproductive system and breast disorders                            |
| Renal and urinary disorders                     | Calculus ureteric                  | 1     | Urticaria localised                 | Skin and subcutaneous tissue disorders                              |
| Nervous system disorders                        | Subarachnoid haemorrhage neonatal  | 1     | Haemophilia                         | Congenital, familial and genetic disorders                          |

| Basis data for network                                              |                                     |       |                                 |                                                                     |
|---------------------------------------------------------------------|-------------------------------------|-------|---------------------------------|---------------------------------------------------------------------|
| SOC1                                                                | AE1                                 | score | AE2                             | SOC2                                                                |
| Musculoskeletal and connective tissue disorders                     | Neck mass                           | 1     | Capillary fragility increased   | Investigations                                                      |
| Neoplasms benign, malignant and unspecified (incl cysts and polyps) | Bowen's disease                     | 1     | Lymphomatoid papulosis          | Skin and subcutaneous tissue disorders                              |
| Infections and infestations                                         | Bronchitis chronic                  | 1     | Nail discomfort                 | Skin and subcutaneous tissue disorders                              |
| Respiratory, thoracic and mediastinal disorders                     | Nasal mucosa atrophy                | 1     | Posterior capsule opacification | Eye disorders                                                       |
| Investigations                                                      | Ceruloplasmin increased             | 1     | Plasminogen increased           | Investigations                                                      |
| Investigations                                                      | Platelet aggregation abnormal       | 1     | Pneumonia viral                 | Infections and infestations                                         |
| Congenital, familial and genetic disorders                          | Hypertelorism of orbit              | 1     | White blood cells urine         | Investigations                                                      |
| Infections and infestations                                         | Nocardiosis                         | 1     | Anorexia nervosa                | Psychiatric disorders                                               |
| Nervous system disorders                                            | Ballismus                           | 1     | Rectal neoplasm                 | Neoplasms benign, malignant and unspecified (incl cysts and polyps) |
| Investigations                                                      | Neutrophil percentage increased     | 1     | Myelocyte count increased       | Investigations                                                      |
| Congenital, familial and genetic disorders                          | Congenital multiplex arthrogryposis | 1     | Congenital hydrocephalus        | Congenital, familial and genetic disorders                          |
| Congenital, familial and genetic disorders                          | Congenital cerebral cyst            | 1     | Postpartum haemorrhage          | Pregnancy, puerperium and perinatal conditions                      |
| Infections and infestations                                         | Fungal oesophagitis                 | 1     | Pharyngeal polyp                | Respiratory, thoracic and mediastinal disorders                     |
| Renal and urinary disorders                                         | Renal necrosis                      | 1     | Computerised tomogram abnormal  | Investigations                                                      |
| Eye disorders                                                       | Anterior chamber disorder           | 1     | Onchocerciasis                  | Infections and infestations                                         |
| Eye disorders                                                       | Scleromalacia                       | 1     | Posterior capsule opacification | Eye disorders                                                       |
| Infections and infestations                                         | Lung infection pseudomonal          | 1     | Pseudomonas infection           | Infections and infestations                                         |
| Infections and infestations                                         | Pneumonia primary atypical          | 1     | Chondrodystrophy                | Congenital, familial and genetic disorders                          |
| Investigations                                                      | Urine bilirubin increased           | 1     | Leukoplakia oral                | Gastrointestinal disorders                                          |
| Nervous system disorders                                            | Sudden onset of sleep               | 1     | Nocturnal dyspnoea              | Respiratory, thoracic and mediastinal disorders                     |

| Basis data for network                                              |                                             |       |                                             |                                                                     |
|---------------------------------------------------------------------|---------------------------------------------|-------|---------------------------------------------|---------------------------------------------------------------------|
| SOC1                                                                | AE1                                         | score | AE2                                         | SOC2                                                                |
| Investigations                                                      | Glucose tolerance test abnormal             | 1     | Infusion related reaction                   | General disorders and administration site conditions                |
| Infections and infestations                                         | Viral upper respiratory tract infection     | 1     | Bradycardia neonatal                        | Cardiac disorders                                                   |
| Vascular disorders                                                  | Femoral artery aneurysm                     | 1     | Abdominal symptom                           | Gastrointestinal disorders                                          |
| Congenital, familial and genetic disorders                          | Congenital hydrocephalus                    | 1     | Retained placenta or membranes              | Pregnancy, puerperium and perinatal conditions                      |
| Neoplasms benign, malignant and unspecified (incl cysts and polyps) | Metastases to lung                          | 1     | Candida sepsis                              | Infections and infestations                                         |
| Infections and infestations                                         | Peridiverticular abscess                    | 1     | Pseudomonas infection                       | Infections and infestations                                         |
| Neoplasms benign, malignant and unspecified (incl cysts and polyps) | Vaginal cancer                              | 1     | Coagulation factor XII level increased      | Investigations                                                      |
| Gastrointestinal disorders                                          | Oesophageal obstruction                     | 1     | Urticaria localised                         | Skin and subcutaneous tissue disorders                              |
| General disorders and administration site conditions                | Catheter site erythema                      | 1     | Catheter site haemorrhage                   | General disorders and administration site conditions                |
| Musculoskeletal and connective tissue disorders                     | Fasciitis                                   | 1     | Creatinine renal clearance                  | Investigations                                                      |
| Metabolism and nutrition disorders                                  | Diet refusal                                | 1     | Abasia                                      | General disorders and administration site conditions                |
| Psychiatric disorders                                               | Hallucination, tactile                      | 1     | Glycosylated haemoglobin increased          | Investigations                                                      |
| Infections and infestations                                         | Creutzfeldt-Jakob disease                   | 1     | Keratosis follicular                        | Congenital, familial and genetic disorders                          |
| Congenital, familial and genetic disorders                          | Hyperreflexia                               | 1     | Cerebellar atrophy                          | Nervous system disorders                                            |
| Investigations                                                      | Blood creatine phosphokinase MB             | 1     | Embolism venous                             | Vascular disorders                                                  |
| Investigations                                                      | Blood creatine phosphokinase MB             | 1     | Troponin I increased                        | Investigations                                                      |
| Neoplasms benign, malignant and unspecified (incl cysts and polyps) | Tongue neoplasm malignant stage unspecified | 1     | Malignant hydatidiform mole                 | Neoplasms benign, malignant and unspecified (incl cysts and polyps) |
| Musculoskeletal and connective tissue disorders                     | Dwarfism                                    | 1     | Tongue neoplasm malignant stage unspecified | Neoplasms benign, malignant and unspecified (incl cysts and polyps) |
| Congenital, familial and genetic disorders                          | Congenital multiplex arthrogryposis         | 1     | Foetal cerebrovascular disorder             | Nervous system disorders                                            |
| Investigations                                                      | White blood cell count                      | 1     | Candida sepsis                              | Infections and infestations                                         |

| Basis data for network                                              |                                 |       |                                           |                                                                     |
|---------------------------------------------------------------------|---------------------------------|-------|-------------------------------------------|---------------------------------------------------------------------|
| SOC1                                                                | AE1                             | score | AE2                                       | SOC2                                                                |
| Infections and infestations                                         | Lung infection pseudomonal      | 1     | Mycobacterium avium complex infection     | Infections and infestations                                         |
| Musculoskeletal and connective tissue disorders                     | Buttock pain                    | 1     | Intention tremor                          | Nervous system disorders                                            |
| Metabolism and nutrition disorders                                  | Hyperhomocysteinaemia           | 1     | Acquired afibrinogenaemia                 | Blood and lymphatic system disorders                                |
| Investigations                                                      | Coagulation time                | 1     | Transient psychosis                       | Psychiatric disorders                                               |
| Investigations                                                      | Blood electrolytes increased    | 1     | Lobar pneumonia                           | Infections and infestations                                         |
| Neoplasms benign, malignant and unspecified (incl cysts and polyps) | Keratoacanthoma                 | 1     | Acanthoma                                 | Neoplasms benign, malignant and unspecified (incl cysts and polyps) |
| Renal and urinary disorders                                         | Renal necrosis                  | 1     | Gingival ulceration                       | Gastrointestinal disorders                                          |
| Infections and infestations                                         | Peridiverticular abscess        | 1     | Mycobacterium avium complex infection     | Infections and infestations                                         |
| Investigations                                                      | Glucose tolerance test abnormal | 1     | Bile duct cancer                          | Neoplasms benign, malignant and unspecified (incl cysts and polyps) |
| Injury, poisoning and procedural complications                      | Wrist fracture                  | 1     | Gastroduodenal haemorrhage                | Gastrointestinal disorders                                          |
| Renal and urinary disorders                                         | Renal infarct                   | 1     | Coronary artery dissection                | Cardiac disorders                                                   |
| Congenital, familial and genetic disorders                          | Meningocele                     | 1     | Pneumonia primary atypical                | Infections and infestations                                         |
| Injury, poisoning and procedural complications                      | Ulnar nerve injury              | 1     | Gingival infection                        | Infections and infestations                                         |
| Investigations                                                      | Glucose tolerance test abnormal | 1     | Bilirubin urine                           | Investigations                                                      |
| Injury, poisoning and procedural complications                      | Uterine rupture                 | 1     | Growth of eyelashes                       | Eye disorders                                                       |
| Gastrointestinal disorders                                          | Aerophagia                      | 1     | Delayed recovery from anaesthesia         | Injury, poisoning and procedural complications                      |
| Vascular disorders                                                  | Arterial rupture                | 1     | Gastrointestinal ulcer perforation        | Gastrointestinal disorders                                          |
| Skin and subcutaneous tissue disorders                              | Ingrowing nail                  | 1     | Nail discomfort                           | Skin and subcutaneous tissue disorders                              |
| Psychiatric disorders                                               | Abulia                          | 1     | Acquired afibrinogenaemia                 | Blood and lymphatic system disorders                                |
| Respiratory, thoracic and mediastinal disorders                     | Mendelson's syndrome            | 1     | Blood creatine phosphokinase MB increased | Investigations                                                      |

| Basis data for network                               |                                               |       |                                       |                                                 |
|------------------------------------------------------|-----------------------------------------------|-------|---------------------------------------|-------------------------------------------------|
| SOC1                                                 | AE1                                           | score | AE2                                   | SOC2                                            |
| Renal and urinary disorders                          | Acute prerenal failure                        | 1     | Mallory-Weiss syndrome                | Gastrointestinal disorders                      |
| Infections and infestations                          | Ureteritis                                    | 1     | Congenital nose malformation          | Congenital, familial and genetic disorders      |
| Psychiatric disorders                                | Hallucination, tactile                        | 1     | Buttock pain                          | Musculoskeletal and connective tissue disorders |
| Investigations                                       | Haemoglobin                                   | 1     | Blood electrolytes increased          | Investigations                                  |
| Respiratory, thoracic and mediastinal disorders      | Nasal mucosa atrophy                          | 1     | Scoliosis                             | Musculoskeletal and connective tissue disorders |
| Congenital, familial and genetic disorders           | Clinodactyly                                  | 1     | Cerebral palsy                        | Congenital, familial and genetic disorders      |
| Eye disorders                                        | Chorioretinopathy                             | 1     | Tendon injury                         | Injury, poisoning and procedural complications  |
| Infections and infestations                          | Candida sepsis                                | 1     | Systemic candida                      | Infections and infestations                     |
| Congenital, familial and genetic disorders           | Deafness congenital                           | 1     | Plasmodium falciparum infection       | Infections and infestations                     |
| General disorders and administration site conditions | Application site discolouration               | 1     | Biopsy endometrium                    | Investigations                                  |
| Metabolism and nutrition disorders                   | Hyperproteinaemia                             | 1     | Abscess of salivary gland             | Infections and infestations                     |
| General disorders and administration site conditions | Microlithiasis                                | 1     | Pituitary haemorrhage                 | Endocrine disorders                             |
| Infections and infestations                          | Application site abscess                      | 1     | Total cholesterol/HDL ratio increased | Investigations                                  |
| Congenital, familial and genetic disorders           | Blepharophimosis congenital                   | 1     | Congenital nose malformation          | Congenital, familial and genetic disorders      |
| Investigations                                       | Blood creatine phosphokinase MB increased     | 1     | Parkinsonian rest tremor              | Nervous system disorders                        |
| Investigations                                       | Mean cell haemoglobin concentration increased | 1     | Mean cell haemoglobin decreased       | Investigations                                  |
| Psychiatric disorders                                | Psychosomatic disease                         | 1     | Uterine inflammation                  | Reproductive system and breast disorders        |
| Gastrointestinal disorders                           | Pancreatic necrosis                           | 1     | Hyperhomocysteinaemia                 | Metabolism and nutrition disorders              |
| Respiratory, thoracic and mediastinal disorders      | Tonsillar disorder                            | 1     | Lower gastrointestinal haemorrhage    | Gastrointestinal disorders                      |
| Cardiac disorders                                    | Cardiac ventricular disorder                  | 1     | Fungal sepsis                         | Infections and infestations                     |

| Basis data for network                                              |                                       |       |                              |                                                                     |
|---------------------------------------------------------------------|---------------------------------------|-------|------------------------------|---------------------------------------------------------------------|
| SOC1                                                                | AE1                                   | score | AE2                          | SOC2                                                                |
| Ear and labyrinth disorders                                         | Eustachian tube dysfunction           | 1     | Neck mass                    | Musculoskeletal and connective tissue disorders                     |
| Congenital, familial and genetic disorders                          | Sickle cell anaemia with crisis       | 1     | Sickle cell anaemia          | Congenital, familial and genetic disorders                          |
| Congenital, familial and genetic disorders                          | Meningocele                           | 1     | Chronic hepatitis            | Hepatobiliary disorders                                             |
| Congenital, familial and genetic disorders                          | Meningocele                           | 1     | Hypoglycaemia unawareness    | Metabolism and nutrition disorders                                  |
| Gastrointestinal disorders                                          | Rectal polyp                          | 1     | Injection site paraesthesia  | General disorders and administration site conditions                |
| Nervous system disorders                                            | Neurodegenerative disorder            | 1     | Hyperhomocysteinaemia        | Metabolism and nutrition disorders                                  |
| Blood and lymphatic system disorders                                | Neutropenia neonatal                  | 1     | Blepharophimosis congenital  | Congenital, familial and genetic disorders                          |
| Infections and infestations                                         | Creutzfeldt-Jakob disease             | 1     | Tinea versicolour            | Infections and infestations                                         |
| Vascular disorders                                                  | Diabetic vascular disorder            | 1     | Salpingo-oophoritis          | Infections and infestations                                         |
| Gastrointestinal disorders                                          | Mallory-Weiss syndrome                | 1     | Budd-Chiari syndrome         | Hepatobiliary disorders                                             |
| Congenital, familial and genetic disorders                          | Coarctation of the aorta              | 1     | Porencephaly                 | Congenital, familial and genetic disorders                          |
| Renal and urinary disorders                                         | Renal necrosis                        | 1     | Fasciitis                    | Musculoskeletal and connective tissue disorders                     |
| Reproductive system and breast disorders                            | Spontaneous penile erection           | 1     | Parkinsonian rest tremor     | Nervous system disorders                                            |
| Investigations                                                      | White blood cells urine               | 1     | Scrotal ulcer                | Reproductive system and breast disorders                            |
| Neoplasms benign, malignant and unspecified (incl cysts and polyps) | Metastatic neoplasm                   | 1     | Infusion related reaction    | General disorders and administration site conditions                |
| Investigations                                                      | Protein urine                         | 1     | Nocturnal dyspnoea           | Respiratory, thoracic and mediastinal disorders                     |
| Reproductive system and breast disorders                            | Teratospermia                         | 1     | Calciophylaxis               | Metabolism and nutrition disorders                                  |
| Investigations                                                      | Total cholesterol/HDL ratio increased | 1     | Application site anaesthesia | General disorders and administration site conditions                |
| Endocrine disorders                                                 | Adrenal haemorrhage                   | 1     | Post procedural haematoma    | Injury, poisoning and procedural complications                      |
| Neoplasms benign, malignant and unspecified (incl cysts and polyps) | Fibroma                               | 1     | Fibromatosis                 | Neoplasms benign, malignant and unspecified (incl cysts and polyps) |



| Basis data for network                                              |                                       |       |                                        |                                                                     |
|---------------------------------------------------------------------|---------------------------------------|-------|----------------------------------------|---------------------------------------------------------------------|
| SOC1                                                                | AE1                                   | score | AE2                                    | SOC2                                                                |
| Respiratory, thoracic and mediastinal disorders                     | Nasal mucosa atrophy                  | 1     | Tendon injury                          | Injury, poisoning and procedural complications                      |
| Nervous system disorders                                            | Cervical root pain                    | 1     | Hepatic enzyme decreased               | Investigations                                                      |
| Investigations                                                      | Glucocorticoids decreased             | 1     | Transaminases decreased                | Investigations                                                      |
| Neoplasms benign, malignant and unspecified (incl cysts and polyps) | Neurofibroma                          | 1     | Keratoacanthoma                        | Neoplasms benign, malignant and unspecified (incl cysts and polyps) |
| Gastrointestinal disorders                                          | Pancreatic pseudocyst                 | 1     | Diabetes mellitus insulin-dependent    | Metabolism and nutrition disorders                                  |
| Musculoskeletal and connective tissue disorders                     | Muscle contracture                    | 1     | Lip haemorrhage                        | Gastrointestinal disorders                                          |
| Immune system disorders                                             | Allergy to arthropod bite             | 1     | Median nerve lesion                    | Nervous system disorders                                            |
| Infections and infestations                                         | Enterococcal bacteraemia              | 1     | HIV infection                          | Infections and infestations                                         |
| Neoplasms benign, malignant and unspecified (incl cysts and polyps) | Throat cancer                         | 1     | Listeriosis                            | Infections and infestations                                         |
| Infections and infestations                                         | Urinary tract infection fungal        | 1     | Infusion site bruising                 | General disorders and administration site conditions                |
| Respiratory, thoracic and mediastinal disorders                     | Tonsillar disorder                    | 1     | Median nerve lesion                    | Nervous system disorders                                            |
| Gastrointestinal disorders                                          | Rectal polyp                          | 1     | Testis discomfort                      | Reproductive system and breast disorders                            |
| Blood and lymphatic system disorders                                | Myeloid maturation arrest             | 1     | Urinary tract pain                     | Renal and urinary disorders                                         |
| Neoplasms benign, malignant and unspecified (incl cysts and polyps) | Choriocarcinoma                       | 1     | Prolactinoma                           | Neoplasms benign, malignant and unspecified (incl cysts and polyps) |
| General disorders and administration site conditions                | Infusion related reaction             | 1     | Systemic candida                       | Infections and infestations                                         |
| Musculoskeletal and connective tissue disorders                     | Buttock pain                          | 1     | Dizziness exertional                   | Nervous system disorders                                            |
| Musculoskeletal and connective tissue disorders                     | Coccydynia                            | 1     | Glycosylated haemoglobin increased     | Investigations                                                      |
| Congenital, familial and genetic disorders                          | Meningomyelocele                      | 1     | Poor sucking reflex                    | Nervous system disorders                                            |
| Investigations                                                      | Coagulation factor IX level increased | 1     | Coagulation factor XII level increased | Investigations                                                      |
| Injury, poisoning and procedural complications                      | Wrist fracture                        | 1     | Tonsillar disorder                     | Respiratory, thoracic and mediastinal disorders                     |

| Basis data for network                               |                                          |       |                                           |                                                 |
|------------------------------------------------------|------------------------------------------|-------|-------------------------------------------|-------------------------------------------------|
| SOC1                                                 | AE1                                      | score | AE2                                       | SOC2                                            |
| Investigations                                       | Glomerular filtration rate               | 1     | Urine osmolality                          | Investigations                                  |
| Investigations                                       | Creatinine urine decreased               | 1     | Pharyngeal polyp                          | Respiratory, thoracic and mediastinal disorders |
| Infections and infestations                          | Disseminated tuberculosis                | 1     | Escherichia bacteraemia                   | Infections and infestations                     |
| Gastrointestinal disorders                           | Oesophageal obstruction                  | 1     | Calculus ureteric                         | Renal and urinary disorders                     |
| General disorders and administration site conditions | Catheter site erythema                   | 1     | Mediastinal disorder                      | Respiratory, thoracic and mediastinal disorders |
| Eye disorders                                        | Scleromalacia                            | 1     | Blood chromium decreased                  | Investigations                                  |
| Respiratory, thoracic and mediastinal disorders      | Mendelson's syndrome                     | 1     | Self mutilation                           | Injury, poisoning and procedural complications  |
| Infections and infestations                          | Injection site pustule                   | 1     | Neutrophil percentage decreased           | Investigations                                  |
| Nervous system disorders                             | Atonic seizures                          | 1     | Toxic induced encephalopathy              | Nervous system disorders                        |
| Respiratory, thoracic and mediastinal disorders      | Pulmonary thrombosis                     | 1     | Oestrogen deficiency                      | Endocrine disorders                             |
| Skin and subcutaneous tissue disorders               | Penile ulceration                        | 1     | Albumin globulin ratio abnormal           | Investigations                                  |
| Investigations                                       | Urine osmolality decreased               | 1     | Rectal perforation                        | Gastrointestinal disorders                      |
| Ear and labyrinth disorders                          | Deafness transitory                      | 1     | Staring                                   | Psychiatric disorders                           |
| Musculoskeletal and connective tissue disorders      | Senile ankylosing vertebral hyperostosis | 1     | Madarosis                                 | Eye disorders                                   |
| Musculoskeletal and connective tissue disorders      | Buttock pain                             | 1     | Blood creatine phosphokinase MB increased | Investigations                                  |
| Infections and infestations                          | Sweat gland infection                    | 1     | Parathyroid gland enlargement             | Endocrine disorders                             |
| Eye disorders                                        | Madarosis                                | 1     | Lichenification                           | Skin and subcutaneous tissue disorders          |
| Investigations                                       | Central venous pressure decreased        | 1     | Hyperosmolar state                        | Metabolism and nutrition disorders              |
| Investigations                                       | Glycosylated haemoglobin increased       | 1     | Blood creatine phosphokinase MB increased | Investigations                                  |
| Infections and infestations                          | Candida sepsis                           | 1     | HIV infection                             | Infections and infestations                     |

| Basis data for network                                              |                                               |       |                                 |                                                 |
|---------------------------------------------------------------------|-----------------------------------------------|-------|---------------------------------|-------------------------------------------------|
| SOC1                                                                | AE1                                           | score | AE2                             | SOC2                                            |
| Musculoskeletal and connective tissue disorders                     | Muscle contracture                            | 1     | Blood glucose fluctuation       | Investigations                                  |
| Investigations                                                      | PCO2 increased                                | 1     | Pupillary disorder              | Eye disorders                                   |
| Reproductive system and breast disorders                            | Uterine cervical laceration                   | 1     | Growth of eyelashes             | Eye disorders                                   |
| Nervous system disorders                                            | Sleep paralysis                               | 1     | Dysstasia                       | Nervous system disorders                        |
| Infections and infestations                                         | Vulvovaginitis trichomonal                    | 1     | Food allergy                    | Immune system disorders                         |
| Investigations                                                      | Thyroxine free decreased                      | 1     | Papillary muscle disorder       | Cardiac disorders                               |
| Musculoskeletal and connective tissue disorders                     | Senile ankylosing vertebral hyperostosis      | 1     | Blood iron increased            | Investigations                                  |
| Reproductive system and breast disorders                            | Bleeding anovulatory                          | 1     | Vulvovaginitis trichomonal      | Infections and infestations                     |
| Congenital, familial and genetic disorders                          | Congenital cerebral cyst                      | 1     | Foetal cerebrovascular disorder | Nervous system disorders                        |
| Musculoskeletal and connective tissue disorders                     | Coccydynia                                    | 1     | Buttock pain                    | Musculoskeletal and connective tissue disorders |
| Gastrointestinal disorders                                          | Intestinal ulcer perforation                  | 1     | Stomatitis necrotising          | Gastrointestinal disorders                      |
| Investigations                                                      | Anti-platelet antibody positive               | 1     | Post procedural haematoma       | Injury, poisoning and procedural complications  |
| Investigations                                                      | Mean cell haemoglobin decreased               | 1     | Pupillary disorder              | Eye disorders                                   |
| Skin and subcutaneous tissue disorders                              | Lichenification                               | 1     | Blood iron increased            | Investigations                                  |
| Gastrointestinal disorders                                          | Gingival ulceration                           | 1     | Creatinine renal clearance      | Investigations                                  |
| Congenital, familial and genetic disorders                          | Congenital brain damage                       | 1     | Coronary artery dissection      | Cardiac disorders                               |
| Musculoskeletal and connective tissue disorders                     | Senile ankylosing vertebral hyperostosis      | 1     | Cryptorchism                    | Congenital, familial and genetic disorders      |
| Neoplasms benign, malignant and unspecified (incl cysts and polyps) | Tongue neoplasm malignant stage unspecified   | 1     | Neurofibromatosis               | Congenital, familial and genetic disorders      |
| Investigations                                                      | Mean cell haemoglobin concentration increased | 1     | PCO2 increased                  | Investigations                                  |
| Metabolism and nutrition disorders                                  | Hypoglycaemia unawareness                     | 1     | Cephalhaematoma                 | Injury, poisoning and procedural complications  |

| Basis data for network                                              |                                    |       |                                |                                                                     |
|---------------------------------------------------------------------|------------------------------------|-------|--------------------------------|---------------------------------------------------------------------|
| SOC1                                                                | AE1                                | score | AE2                            | SOC2                                                                |
| Congenital, familial and genetic disorders                          | Cryptorchism                       | 1     | Lichenification                | Skin and subcutaneous tissue disorders                              |
| Reproductive system and breast disorders                            | Testis discomfort                  | 1     | Pleural rub                    | Respiratory, thoracic and mediastinal disorders                     |
| Hepatobiliary disorders                                             | Biliary fibrosis                   | 1     | Visceral arterial ischaemia    | Vascular disorders                                                  |
| Investigations                                                      | Creatinine renal clearance         | 1     | Computerised tomogram abnormal | Investigations                                                      |
| Nervous system disorders                                            | Hypoxic encephalopathy             | 1     | Eosinophilic colitis           | Gastrointestinal disorders                                          |
| General disorders and administration site conditions                | Infusion related reaction          | 1     | Metastases to lung             | Neoplasms benign, malignant and unspecified (incl cysts and polyps) |
| General disorders and administration site conditions                | Application site discolouration    | 1     | Application site anaesthesia   | General disorders and administration site conditions                |
| Congenital, familial and genetic disorders                          | Haemophilia                        | 1     | Epidermolysis bullosa          | Congenital, familial and genetic disorders                          |
| Blood and lymphatic system disorders                                | Acquired afibrinogenaemia          | 1     | Pancreatic necrosis            | Gastrointestinal disorders                                          |
| Neoplasms benign, malignant and unspecified (incl cysts and polyps) | Metastases to liver                | 1     | Leukoplakia oral               | Gastrointestinal disorders                                          |
| Investigations                                                      | White blood cell count             | 1     | Infusion related reaction      | General disorders and administration site conditions                |
| Metabolism and nutrition disorders                                  | Diet refusal                       | 1     | Buttock pain                   | Musculoskeletal and connective tissue disorders                     |
| Musculoskeletal and connective tissue disorders                     | Scoliosis                          | 1     | Laryngeal obstruction          | Respiratory, thoracic and mediastinal disorders                     |
| Congenital, familial and genetic disorders                          | Clinodactyly                       | 1     | Pancreatic necrosis            | Gastrointestinal disorders                                          |
| Respiratory, thoracic and mediastinal disorders                     | Hypopnoea                          | 1     | Dysstasia                      | Nervous system disorders                                            |
| Investigations                                                      | Glycosylated haemoglobin increased | 1     | Intention tremor               | Nervous system disorders                                            |
| Reproductive system and breast disorders                            | Scrotal ulcer                      | 1     | Retinoic acid syndrome         | Respiratory, thoracic and mediastinal disorders                     |
| Infections and infestations                                         | Systemic candida                   | 1     | Enterococcal bacteraemia       | Infections and infestations                                         |
| Investigations                                                      | Glycosylated haemoglobin increased | 1     | Diet refusal                   | Metabolism and nutrition disorders                                  |
| Musculoskeletal and connective tissue disorders                     | Myopathy toxic                     | 1     | Cardiac arrest neonatal        | Cardiac disorders                                                   |

| Basis data for network                                              |                                             |       |                             |                                                                     |
|---------------------------------------------------------------------|---------------------------------------------|-------|-----------------------------|---------------------------------------------------------------------|
| SOC1                                                                | AE1                                         | score | AE2                         | SOC2                                                                |
| Nervous system disorders                                            | Spinal claudication                         | 1     | B-cell lymphoma             | Neoplasms benign, malignant and unspecified (incl cysts and polyps) |
| General disorders and administration site conditions                | Application site discolouration             | 1     | Application site abscess    | Infections and infestations                                         |
| Respiratory, thoracic and mediastinal disorders                     | Mendelson's syndrome                        | 1     | Scratch                     | Injury, poisoning and procedural complications                      |
| Neoplasms benign, malignant and unspecified (incl cysts and polyps) | Tongue neoplasm malignant stage unspecified | 1     | Anal atresia                | Congenital, familial and genetic disorders                          |
| Metabolism and nutrition disorders                                  | Vitamin D deficiency                        | 1     | Oculomotor study abnormal   | Investigations                                                      |
| General disorders and administration site conditions                | Infusion site bruising                      | 1     | Alcoholic pancreatitis      | Gastrointestinal disorders                                          |
| Metabolism and nutrition disorders                                  | Diet refusal                                | 1     | Flat affect                 | Psychiatric disorders                                               |
| Investigations                                                      | Total cholesterol/HDL ratio increased       | 1     | Biopsy endometrium          | Investigations                                                      |
| Infections and infestations                                         | Bronchitis chronic                          | 1     | Ingrowing nail              | Skin and subcutaneous tissue disorders                              |
| Neoplasms benign, malignant and unspecified (incl cysts and polyps) | Malignant hydatidiform mole                 | 1     | Dermoid cyst of ovary       | Congenital, familial and genetic disorders                          |
| Musculoskeletal and connective tissue disorders                     | Dwarfism                                    | 1     | Dermoid cyst of ovary       | Congenital, familial and genetic disorders                          |
| Injury, poisoning and procedural complications                      | Brain herniation                            | 1     | Hypocalciuria               | Renal and urinary disorders                                         |
| Investigations                                                      | Blood electrolytes increased                | 1     | Drug level increased        | Investigations                                                      |
| Metabolism and nutrition disorders                                  | Hyperproteinaemia                           | 1     | Kidney infection            | Infections and infestations                                         |
| Infections and infestations                                         | Creutzfeldt-Jakob disease                   | 1     | Cerebellar atrophy          | Nervous system disorders                                            |
| Congenital, familial and genetic disorders                          | Congenital nose malformation                | 1     | Ovarian fibrosis            | Reproductive system and breast disorders                            |
| Congenital, familial and genetic disorders                          | Choanal atresia                             | 1     | Insulin autoimmune syndrome | Immune system disorders                                             |
| Nervous system disorders                                            | Median nerve lesion                         | 1     | Cartilage injury            | Injury, poisoning and procedural complications                      |
| Endocrine disorders                                                 | Parathyroid gland enlargement               | 1     | Tinea versicolour           | Infections and infestations                                         |
| General disorders and administration site conditions                | Fever neonatal                              | 1     | Vomiting neonatal           | Gastrointestinal disorders                                          |

| Basis data for network                                              |                                        |       |                                |                                                 |
|---------------------------------------------------------------------|----------------------------------------|-------|--------------------------------|-------------------------------------------------|
| SOC1                                                                | AE1                                    | score | AE2                            | SOC2                                            |
| Eye disorders                                                       | Chorioretinopathy                      | 1     | Scoliosis                      | Musculoskeletal and connective tissue disorders |
| Investigations                                                      | Bone density increased                 | 1     | Transaminases decreased        | Investigations                                  |
| Vascular disorders                                                  | Peripheral circulatory failure         | 1     | Leukoplakia oral               | Gastrointestinal disorders                      |
| Neoplasms benign, malignant and unspecified (incl cysts and polyps) | Bowen's disease                        | 1     | Polymorphic light eruption     | Skin and subcutaneous tissue disorders          |
| Congenital, familial and genetic disorders                          | Skeleton dysplasia                     | 1     | Yersinia infection             | Infections and infestations                     |
| Congenital, familial and genetic disorders                          | Cerebral atrophy congenital            | 1     | Spinal claudication            | Nervous system disorders                        |
| General disorders and administration site conditions                | Fever neonatal                         | 1     | Neonatal tachypnoea            | Respiratory, thoracic and mediastinal disorders |
| Respiratory, thoracic and mediastinal disorders                     | Retinoic acid syndrome                 | 1     | Acne fulminans                 | Skin and subcutaneous tissue disorders          |
| Musculoskeletal and connective tissue disorders                     | Tendon calcification                   | 1     | Retinoic acid syndrome         | Respiratory, thoracic and mediastinal disorders |
| Respiratory, thoracic and mediastinal disorders                     | Hypopnoea                              | 1     | Allergic sinusitis             | Respiratory, thoracic and mediastinal disorders |
| Respiratory, thoracic and mediastinal disorders                     | Lower respiratory tract inflammation   | 1     | Tendon calcification           | Musculoskeletal and connective tissue disorders |
| Infections and infestations                                         | Dysentery                              | 1     | Choluria                       | Renal and urinary disorders                     |
| Neoplasms benign, malignant and unspecified (incl cysts and polyps) | Meningioma                             | 1     | Urine ketone body present      | Investigations                                  |
| Infections and infestations                                         | Periodontal destruction                | 1     | Kidney infection               | Infections and infestations                     |
| Infections and infestations                                         | Pseudomonas infection                  | 1     | Mediastinal disorder           | Respiratory, thoracic and mediastinal disorders |
| Infections and infestations                                         | Bronchitis chronic                     | 1     | Nail hypertrophy               | Skin and subcutaneous tissue disorders          |
| Renal and urinary disorders                                         | Bladder stenosis                       | 1     | Bile output decreased          | Investigations                                  |
| Endocrine disorders                                                 | Pituitary haemorrhage                  | 1     | Biliary dilatation             | Hepatobiliary disorders                         |
| Injury, poisoning and procedural complications                      | Ulnar nerve injury                     | 1     | Helicobacter infection         | Infections and infestations                     |
| Investigations                                                      | Coagulation factor XII level increased | 1     | Alpha-1 anti-trypsin increased | Investigations                                  |

| Basis data for network                          |                                           |       |                                      |                                                                     |
|-------------------------------------------------|-------------------------------------------|-------|--------------------------------------|---------------------------------------------------------------------|
| SOC1                                            | AE1                                       | score | AE2                                  | SOC2                                                                |
| Musculoskeletal and connective tissue disorders | Neck mass                                 | 1     | Muscle contracture                   | Musculoskeletal and connective tissue disorders                     |
| Congenital, familial and genetic disorders      | Congenital hydrocephalus                  | 1     | Postpartum haemorrhage               | Pregnancy, puerperium and perinatal conditions                      |
| Respiratory, thoracic and mediastinal disorders | Pleural rub                               | 1     | Throat cancer                        | Neoplasms benign, malignant and unspecified (incl cysts and polyps) |
| Skin and subcutaneous tissue disorders          | Acne fulminans                            | 1     | Lower respiratory tract inflammation | Respiratory, thoracic and mediastinal disorders                     |
| Infections and infestations                     | Pulmonary tuberculosis                    | 1     | Lung abscess                         | Infections and infestations                                         |
| Metabolism and nutrition disorders              | Vitamin D deficiency                      | 1     | Eosinophilic colitis                 | Gastrointestinal disorders                                          |
| Investigations                                  | Blood creatine phosphokinase MB increased | 1     | Blunted affect                       | Psychiatric disorders                                               |
| Investigations                                  | Electrocardiogram R on T phenomenon       | 1     | Heterophoria                         | Eye disorders                                                       |
| Investigations                                  | Stroke volume increased                   | 1     | Intraventricular haemorrhage         | Nervous system disorders                                            |
| Congenital, familial and genetic disorders      | Tooth discolouration congenital           | 1     | Cataract congenital                  | Congenital, familial and genetic disorders                          |
| Gastrointestinal disorders                      | Proctitis ulcerative                      | 1     | Anal injury                          | Injury, poisoning and procedural complications                      |
| Infections and infestations                     | Injection site pustule                    | 1     | Myelocyte count increased            | Investigations                                                      |
| Gastrointestinal disorders                      | Lip haemorrhage                           | 1     | Diabetic retinopathy                 | Eye disorders                                                       |
| Investigations                                  | Blood creatine phosphokinase MB increased | 1     | Abasia                               | General disorders and administration site conditions                |
| Investigations                                  | Spermatozoa morphology abnormal           | 1     | Prostatic specific antigen decreased | Investigations                                                      |
| Infections and infestations                     | Helicobacter infection                    | 1     | Sickle cell anaemia with crisis      | Congenital, familial and genetic disorders                          |
| Respiratory, thoracic and mediastinal disorders | Tonsillar disorder                        | 1     | Purpura senile                       | Skin and subcutaneous tissue disorders                              |
| Congenital, familial and genetic disorders      | Hyperexplexia                             | 1     | Sweat gland infection                | Infections and infestations                                         |
| Psychiatric disorders                           | Psychosomatic disease                     | 1     | Fat intolerance                      | Metabolism and nutrition disorders                                  |
| Injury, poisoning and procedural complications  | Femur fracture                            | 1     | Trigger finger                       | Musculoskeletal and connective tissue disorders                     |

| Basis data for network                                              |                                           |       |                                 |                                                                     |
|---------------------------------------------------------------------|-------------------------------------------|-------|---------------------------------|---------------------------------------------------------------------|
| SOC1                                                                | AE1                                       | score | AE2                             | SOC2                                                                |
| Infections and infestations                                         | Abscess of salivary gland                 | 1     | Submandibular mass              | General disorders and administration site conditions                |
| Congenital, familial and genetic disorders                          | Congenital bladder anomaly                | 1     | Congenital hydrocephalus        | Congenital, familial and genetic disorders                          |
| Investigations                                                      | Electrocardiogram Q wave abnormal         | 1     | Meningioma                      | Neoplasms benign, malignant and unspecified (incl cysts and polyps) |
| Neoplasms benign, malignant and unspecified (incl cysts and polyps) | Metastases to lung                        | 1     | Bilirubin urine                 | Investigations                                                      |
| Neoplasms benign, malignant and unspecified (incl cysts and polyps) | Bile duct cancer                          | 1     | Metastases to lung              | Neoplasms benign, malignant and unspecified (incl cysts and polyps) |
| Psychiatric disorders                                               | Obsessive-compulsive personality disorder | 1     | Hydroureter                     | Renal and urinary disorders                                         |
| Endocrine disorders                                                 | Parathyroid gland enlargement             | 1     | Keratosi follicular             | Congenital, familial and genetic disorders                          |
| Eye disorders                                                       | Phosphenes                                | 1     | Prolactinoma                    | Neoplasms benign, malignant and unspecified (incl cysts and polyps) |
| Gastrointestinal disorders                                          | Lip haemorrhage                           | 1     | Capillary fragility increased   | Investigations                                                      |
| Skin and subcutaneous tissue disorders                              | Polymorphic light eruption                | 1     | Skin dystrophy                  | Skin and subcutaneous tissue disorders                              |
| Nervous system disorders                                            | Lacunar infarction                        | 1     | Sickle cell anaemia with crisis | Congenital, familial and genetic disorders                          |
| Musculoskeletal and connective tissue disorders                     | Joint ankylosis                           | 1     | Sickle cell anaemia with crisis | Congenital, familial and genetic disorders                          |
| Ear and labyrinth disorders                                         | Ear haemorrhage                           | 1     | Ear canal injury                | Injury, poisoning and procedural complications                      |
| Investigations                                                      | Blood electrolytes increased              | 1     | Electrophoresis abnormal        | Investigations                                                      |
| Psychiatric disorders                                               | Adjustment disorder                       | 1     | Haemochromatosis                | Metabolism and nutrition disorders                                  |
| Eye disorders                                                       | Keratitis interstitial                    | 1     | Optic nerve injury              | Injury, poisoning and procedural complications                      |
| Infections and infestations                                         | Abdominal abscess                         | 1     | Myelocyte count increased       | Investigations                                                      |
| Investigations                                                      | Bilirubin urine                           | 1     | Systemic candida                | Infections and infestations                                         |
| Investigations                                                      | Capillary fragility increased             | 1     | Blood glucose fluctuation       | Investigations                                                      |
| Neoplasms benign, malignant and unspecified (incl cysts and polyps) | Bile duct cancer                          | 1     | Systemic candida                | Infections and infestations                                         |



| Basis data for network                                              |                            |       |                                       |                                                                     |
|---------------------------------------------------------------------|----------------------------|-------|---------------------------------------|---------------------------------------------------------------------|
| SOC1                                                                | AE1                        | score | AE2                                   | SOC2                                                                |
| Respiratory, thoracic and mediastinal disorders                     | Mediastinal disorder       | 1     | Mycobacterium avium complex infection | Infections and infestations                                         |
| Musculoskeletal and connective tissue disorders                     | Joint ankylosis            | 1     | Ulnar nerve injury                    | Injury, poisoning and procedural complications                      |
| Neoplasms benign, malignant and unspecified (incl cysts and polyps) | Prolactinoma               | 1     | Acquired tracheo-oesophageal fistula  | Respiratory, thoracic and mediastinal disorders                     |
| Blood and lymphatic system disorders                                | Dysglobulinaemia           | 1     | Leukoplakia oral                      | Gastrointestinal disorders                                          |
| Injury, poisoning and procedural complications                      | Ulnar nerve injury         | 1     | Lacunar infarction                    | Nervous system disorders                                            |
| Gastrointestinal disorders                                          | Mallory-Weiss syndrome     | 1     | Arterial haemorrhage                  | Vascular disorders                                                  |
| Infections and infestations                                         | Gardnerella infection      | 1     | Biopsy endometrium                    | Investigations                                                      |
| Investigations                                                      | White blood cell count     | 1     | Bile duct cancer                      | Neoplasms benign, malignant and unspecified (incl cysts and polyps) |
| Neoplasms benign, malignant and unspecified (incl cysts and polyps) | Hepatoblastoma             | 1     | Prolactinoma                          | Neoplasms benign, malignant and unspecified (incl cysts and polyps) |
| Hepatobiliary disorders                                             | Biliary fibrosis           | 1     | Prothrombin level abnormal            | Investigations                                                      |
| Vascular disorders                                                  | Diastolic hypertension     | 1     | Stereotypy                            | Psychiatric disorders                                               |
| Investigations                                                      | White blood cell count     | 1     | Bilirubin urine                       | Investigations                                                      |
| Nervous system disorders                                            | Neurodegenerative disorder | 1     | Abulia                                | Psychiatric disorders                                               |
| Neoplasms benign, malignant and unspecified (incl cysts and polyps) | Keratoacanthoma            | 1     | Polymorphic light eruption            | Skin and subcutaneous tissue disorders                              |
| Blood and lymphatic system disorders                                | Neutropenia neonatal       | 1     | Ureteritis                            | Infections and infestations                                         |
| Investigations                                                      | Haptoglobin decreased      | 1     | Haptoglobin increased                 | Investigations                                                      |
| Congenital, familial and genetic disorders                          | Skeleton dysplasia         | 1     | Pulmonary microemboli                 | Respiratory, thoracic and mediastinal disorders                     |
| Renal and urinary disorders                                         | Renal necrosis             | 1     | Febrile convulsion                    | Nervous system disorders                                            |
| Respiratory, thoracic and mediastinal disorders                     | Mendelson's syndrome       | 1     | Spontaneous penile erection           | Reproductive system and breast disorders                            |
| Gastrointestinal disorders                                          | Gastroduodenal haemorrhage | 1     | Median nerve lesion                   | Nervous system disorders                                            |

| Basis data for network                                              |                                           |       |                                        |                                                                     |
|---------------------------------------------------------------------|-------------------------------------------|-------|----------------------------------------|---------------------------------------------------------------------|
| SOC1                                                                | AE1                                       | score | AE2                                    | SOC2                                                                |
| Investigations                                                      | Blood creatine phosphokinase MB increased | 1     | Flat affect                            | Psychiatric disorders                                               |
| Gastrointestinal disorders                                          | Gastrointestinal erosion                  | 1     | Gastrointestinal ulcer perforation     | Gastrointestinal disorders                                          |
| Skin and subcutaneous tissue disorders                              | Nail hypertrophy                          | 1     | Nail discomfort                        | Skin and subcutaneous tissue disorders                              |
| Nervous system disorders                                            | Sleep paralysis                           | 1     | Allergic sinusitis                     | Respiratory, thoracic and mediastinal disorders                     |
| Investigations                                                      | Urine bilirubin increased                 | 1     | Electrocardiogram PR interval          | Investigations                                                      |
| Psychiatric disorders                                               | Suspiciousness                            | 1     | Buttock pain                           | Musculoskeletal and connective tissue disorders                     |
| Infections and infestations                                         | Pneumonia primary atypical                | 1     | Cephalhaematoma                        | Injury, poisoning and procedural complications                      |
| Investigations                                                      | Ceruloplasmin increased                   | 1     | Coagulation factor XII level increased | Investigations                                                      |
| Infections and infestations                                         | Gingival infection                        | 1     | Sickle cell anaemia with crisis        | Congenital, familial and genetic disorders                          |
| Respiratory, thoracic and mediastinal disorders                     | Acquired tracheo-oesophageal fistula      | 1     | Malignant hydatidiform mole            | Neoplasms benign, malignant and unspecified (incl cysts and polyps) |
| Musculoskeletal and connective tissue disorders                     | Dwarfism                                  | 1     | Acquired tracheo-oesophageal fistula   | Respiratory, thoracic and mediastinal disorders                     |
| Injury, poisoning and procedural complications                      | Wrist fracture                            | 1     | Cartilage injury                       | Injury, poisoning and procedural complications                      |
| Investigations                                                      | Blood copper decreased                    | 1     | Blood zinc abnormal                    | Investigations                                                      |
| Investigations                                                      | Electrocardiogram QRS complex             | 1     | Electrocardiogram U-wave abnormality   | Investigations                                                      |
| Neoplasms benign, malignant and unspecified (incl cysts and polyps) | Parathyroid tumour                        | 1     | Foot fracture                          | Injury, poisoning and procedural complications                      |
| Psychiatric disorders                                               | Obsessive thoughts                        | 1     | Premature menopause                    | Reproductive system and breast disorders                            |
| Investigations                                                      | Creatinine renal clearance                | 1     | Febrile convulsion                     | Nervous system disorders                                            |
| Congenital, familial and genetic disorders                          | Dermoid cyst of ovary                     | 1     | Prolactinoma                           | Neoplasms benign, malignant and unspecified (incl cysts and polyps) |
| General disorders and administration site conditions                | Infusion related reaction                 | 1     | Hepatic enzyme                         | Investigations                                                      |
| Congenital, familial and genetic disorders                          | Anal atresia                              | 1     | Acquired tracheo-oesophageal fistula   | Respiratory, thoracic and mediastinal disorders                     |

| Basis data for network                                              |                                             |       |                                    |                                                                     |
|---------------------------------------------------------------------|---------------------------------------------|-------|------------------------------------|---------------------------------------------------------------------|
| SOC1                                                                | AE1                                         | score | AE2                                | SOC2                                                                |
| Skin and subcutaneous tissue disorders                              | Lymphomatoid papulosis                      | 1     | Polymorphic light eruption         | Skin and subcutaneous tissue disorders                              |
| Infections and infestations                                         | Central nervous system infection            | 1     | Subdural effusion                  | Nervous system disorders                                            |
| Congenital, familial and genetic disorders                          | Anal atresia                                | 1     | Hepatoblastoma                     | Neoplasms benign, malignant and unspecified (incl cysts and polyps) |
| Reproductive system and breast disorders                            | Spontaneous penile erection                 | 1     | Buttock pain                       | Musculoskeletal and connective tissue disorders                     |
| Neoplasms benign, malignant and unspecified (incl cysts and polyps) | Tongue neoplasm malignant stage unspecified | 1     | Prolactinoma                       | Neoplasms benign, malignant and unspecified (incl cysts and polyps) |
| Psychiatric disorders                                               | Suspiciousness                              | 1     | Glycosylated haemoglobin increased | Investigations                                                      |
| Neoplasms benign, malignant and unspecified (incl cysts and polyps) | Malignant melanoma in situ                  | 1     | Hydroureter                        | Renal and urinary disorders                                         |
| General disorders and administration site conditions                | Injection site paraesthesia                 | 1     | Pleural rub                        | Respiratory, thoracic and mediastinal disorders                     |
| Congenital, familial and genetic disorders                          | Homocystinaemia                             | 1     | Hypoxic encephalopathy             | Nervous system disorders                                            |
| Injury, poisoning and procedural complications                      | Ear canal injury                            | 1     | Instillation site irritation       | General disorders and administration site conditions                |
| Eye disorders                                                       | Phosphenes                                  | 1     | Anal atresia                       | Congenital, familial and genetic disorders                          |
| Neoplasms benign, malignant and unspecified (incl cysts and polyps) | Tumour necrosis                             | 1     | Mallory-Weiss syndrome             | Gastrointestinal disorders                                          |
| Reproductive system and breast disorders                            | Spontaneous penile erection                 | 1     | Glycosylated haemoglobin increased | Investigations                                                      |
| Infections and infestations                                         | Gardnerella infection                       | 1     | Application site anaesthesia       | General disorders and administration site conditions                |
| Nervous system disorders                                            | Locked-in syndrome                          | 1     | Pancreatic pseudocyst              | Gastrointestinal disorders                                          |
| Injury, poisoning and procedural complications                      | Self mutilation                             | 1     | Buttock pain                       | Musculoskeletal and connective tissue disorders                     |
| Endocrine disorders                                                 | Oestrogen deficiency                        | 1     | Muscle contracture                 | Musculoskeletal and connective tissue disorders                     |
| Psychiatric disorders                                               | Sleep attacks                               | 1     | Nocturnal dyspnoea                 | Respiratory, thoracic and mediastinal disorders                     |
| Infections and infestations                                         | Periodontal destruction                     | 1     | Abscess of salivary gland          | Infections and infestations                                         |
| Investigations                                                      | Coagulation time                            | 1     | Restrictive cardiomyopathy         | Cardiac disorders                                                   |

| Basis data for network                                              |                                    |       |                           |                                                                     |
|---------------------------------------------------------------------|------------------------------------|-------|---------------------------|---------------------------------------------------------------------|
| SOC1                                                                | AE1                                | score | AE2                       | SOC2                                                                |
| Skin and subcutaneous tissue disorders                              | Acne fulminans                     | 1     | White blood cells urine   | Investigations                                                      |
| Infections and infestations                                         | HIV infection                      | 1     | Bacterial sepsis          | Infections and infestations                                         |
| Nervous system disorders                                            | Sleep paralysis                    | 1     | Sensation of foreign body | General disorders and administration site conditions                |
| Investigations                                                      | White blood cells urine            | 1     | Tendon calcification      | Musculoskeletal and connective tissue disorders                     |
| Investigations                                                      | Glycosylated haemoglobin increased | 1     | Self mutilation           | Injury, poisoning and procedural complications                      |
| Infections and infestations                                         | Escherichia bacteraemia            | 1     | Infusion related reaction | General disorders and administration site conditions                |
| Metabolism and nutrition disorders                                  | Vitamin D deficiency               | 1     | Homocystinaemia           | Congenital, familial and genetic disorders                          |
| Metabolism and nutrition disorders                                  | Diet refusal                       | 1     | Parkinsonian rest tremor  | Nervous system disorders                                            |
| Infections and infestations                                         | Tinea versicolour                  | 1     | Hyperreflexia             | Congenital, familial and genetic disorders                          |
| Infections and infestations                                         | Central line infection             | 1     | Catheter site erythema    | General disorders and administration site conditions                |
| Respiratory, thoracic and mediastinal disorders                     | Laryngeal obstruction              | 1     | Scleromalacia             | Eye disorders                                                       |
| Gastrointestinal disorders                                          | Glossoptosis                       | 1     | Deafness transitory       | Ear and labyrinth disorders                                         |
| Gastrointestinal disorders                                          | Rectal polyp                       | 1     | Throat cancer             | Neoplasms benign, malignant and unspecified (incl cysts and polyps) |
| Gastrointestinal disorders                                          | Pancreatic pseudocyst              | 1     | Gastroesophagitis         | Gastrointestinal disorders                                          |
| Congenital, familial and genetic disorders                          | Dermoid cyst of ovary              | 1     | Anal atresia              | Congenital, familial and genetic disorders                          |
| Neoplasms benign, malignant and unspecified (incl cysts and polyps) | Glioblastoma multiforme            | 1     | Choriocarcinoma           | Neoplasms benign, malignant and unspecified (incl cysts and polyps) |
| Metabolism and nutrition disorders                                  | Diet refusal                       | 1     | Blunted affect            | Psychiatric disorders                                               |
| Infections and infestations                                         | Application site abscess           | 1     | Gardnerella infection     | Infections and infestations                                         |
| Gastrointestinal disorders                                          | Pancreatic fistula                 | 1     | Respiratory moniliasis    | Infections and infestations                                         |
| Infections and infestations                                         | Eczema infected                    | 1     | Pharyngeal polyp          | Respiratory, thoracic and mediastinal disorders                     |

| Basis data for network                                              |                                 |       |                                    |                                                                     |
|---------------------------------------------------------------------|---------------------------------|-------|------------------------------------|---------------------------------------------------------------------|
| SOC1                                                                | AE1                             | score | AE2                                | SOC2                                                                |
| Neoplasms benign, malignant and unspecified (incl cysts and polyps) | Malignant hydatidiform mole     | 1     | Hepatoblastoma                     | Neoplasms benign, malignant and unspecified (incl cysts and polyps) |
| Neoplasms benign, malignant and unspecified (incl cysts and polyps) | Hepatoblastoma                  | 1     | Dwarfism                           | Musculoskeletal and connective tissue disorders                     |
| Vascular disorders                                                  | Diastolic hypertension          | 1     | Automatism                         | Psychiatric disorders                                               |
| Infections and infestations                                         | Sweat gland infection           | 1     | Creutzfeldt-Jakob disease          | Infections and infestations                                         |
| Injury, poisoning and procedural complications                      | Scratch                         | 1     | Buttock pain                       | Musculoskeletal and connective tissue disorders                     |
| Respiratory, thoracic and mediastinal disorders                     | Hypopnoea                       | 1     | Sensation of foreign body          | General disorders and administration site conditions                |
| Endocrine disorders                                                 | Oestrogen deficiency            | 1     | Eustachian tube dysfunction        | Ear and labyrinth disorders                                         |
| Eye disorders                                                       | Phosphenes                      | 1     | Malignant hydatidiform mole        | Neoplasms benign, malignant and unspecified (incl cysts and polyps) |
| Congenital, familial and genetic disorders                          | Congenital optic nerve anomaly  | 1     | Deafness congenital                | Congenital, familial and genetic disorders                          |
| Musculoskeletal and connective tissue disorders                     | Dwarfism                        | 1     | Phosphenes                         | Eye disorders                                                       |
| Infections and infestations                                         | HIV infection                   | 1     | Pseudomonal sepsis                 | Infections and infestations                                         |
| Metabolism and nutrition disorders                                  | Sucrose intolerance             | 1     | Muscle necrosis                    | Musculoskeletal and connective tissue disorders                     |
| Congenital, familial and genetic disorders                          | Neurofibromatosis               | 1     | Choriocarcinoma                    | Neoplasms benign, malignant and unspecified (incl cysts and polyps) |
| Injury, poisoning and procedural complications                      | Scratch                         | 1     | Glycosylated haemoglobin increased | Investigations                                                      |
| Congenital, familial and genetic disorders                          | Keratosis follicular            | 1     | Hyperreflexia                      | Congenital, familial and genetic disorders                          |
| General disorders and administration site conditions                | Pseudocyst                      | 1     | Clinodactyly                       | Congenital, familial and genetic disorders                          |
| Investigations                                                      | Blood creatine phosphokinase MB | 1     | Ejection fraction abnormal         | Investigations                                                      |
| Respiratory, thoracic and mediastinal disorders                     | Mendelson's syndrome            | 1     | Diet refusal                       | Metabolism and nutrition disorders                                  |
| Endocrine disorders                                                 | Pituitary haemorrhage           | 1     | Biliary neoplasm                   | Neoplasms benign, malignant and unspecified (incl cysts and polyps) |
| Respiratory, thoracic and mediastinal disorders                     | Nasal mucosa atrophy            | 1     | Scleromalacia                      | Eye disorders                                                       |

| Basis data for network                                              |                                          |       |                                               |                                                                     |
|---------------------------------------------------------------------|------------------------------------------|-------|-----------------------------------------------|---------------------------------------------------------------------|
| SOC1                                                                | AE1                                      | score | AE2                                           | SOC2                                                                |
| Musculoskeletal and connective tissue disorders                     | Craniosynostosis                         | 1     | Congenital nose malformation                  | Congenital, familial and genetic disorders                          |
| Neoplasms benign, malignant and unspecified (incl cysts and polyps) | Adult T-cell lymphoma/leukaemia          | 1     | Glucose tolerance test abnormal               | Investigations                                                      |
| Investigations                                                      | Coagulation factor XII level increased   | 1     | Breast cyst                                   | Reproductive system and breast disorders                            |
| Neoplasms benign, malignant and unspecified (incl cysts and polyps) | Laryngeal neoplasm                       | 1     | Anaplastic thyroid cancer                     | Neoplasms benign, malignant and unspecified (incl cysts and polyps) |
| Investigations                                                      | Catecholamines urine increased           | 1     | Intraventricular haemorrhage                  | Nervous system disorders                                            |
| Eye disorders                                                       | Pupillary disorder                       | 1     | Mean cell haemoglobin concentration increased | Investigations                                                      |
| Investigations                                                      | Smear cervix                             | 1     | Gardnerella infection                         | Infections and infestations                                         |
| Hepatobiliary disorders                                             | Budd-Chiari syndrome                     | 1     | Acute prerenal failure                        | Renal and urinary disorders                                         |
| General disorders and administration site conditions                | Pseudocyst                               | 1     | Androgens increased                           | Investigations                                                      |
| Nervous system disorders                                            | Median nerve lesion                      | 1     | Oral infection                                | Infections and infestations                                         |
| Neoplasms benign, malignant and unspecified (incl cysts and polyps) | Bronchial carcinoma                      | 1     | CSF protein increased                         | Investigations                                                      |
| Investigations                                                      | Total cholesterol/HDL ratio increased    | 1     | Smear cervix                                  | Investigations                                                      |
| Hepatobiliary disorders                                             | Biliary fibrosis                         | 1     | Red blood cell sedimentation rate abnormal    | Investigations                                                      |
| Neoplasms benign, malignant and unspecified (incl cysts and polyps) | Colorectal cancer                        | 1     | Coagulation factor XII level increased        | Investigations                                                      |
| Neoplasms benign, malignant and unspecified (incl cysts and polyps) | Adult T-cell lymphoma/leukaemia          | 1     | White blood cell count                        | Investigations                                                      |
| Infections and infestations                                         | Peridiverticular abscess                 | 1     | Lung infection pseudomonal                    | Infections and infestations                                         |
| Neoplasms benign, malignant and unspecified (incl cysts and polyps) | Adult T-cell lymphoma/leukaemia          | 1     | Metastases to lung                            | Neoplasms benign, malignant and unspecified (incl cysts and polyps) |
| Reproductive system and breast disorders                            | Testis discomfort                        | 1     | Listeriosis                                   | Infections and infestations                                         |
| Neoplasms benign, malignant and unspecified (incl cysts and polyps) | Adult T-cell lymphoma/leukaemia          | 1     | Systemic candida                              | Infections and infestations                                         |
| Musculoskeletal and connective tissue disorders                     | Senile ankylosing vertebral hyperostosis | 1     | Lichenification                               | Skin and subcutaneous tissue disorders                              |

| Basis data for network                                              |                                     |       |                                 |                                                                     |
|---------------------------------------------------------------------|-------------------------------------|-------|---------------------------------|---------------------------------------------------------------------|
| SOC1                                                                | AE1                                 | score | AE2                             | SOC2                                                                |
| Infections and infestations                                         | Eczema infected                     | 1     | Pharyngeal candidiasis          | Infections and infestations                                         |
| Infections and infestations                                         | Cytomegalovirus colitis             | 1     | Cellulitis staphylococcal       | Infections and infestations                                         |
| Renal and urinary disorders                                         | Urethral syndrome                   | 1     | Cholesteatoma                   | Neoplasms benign, malignant and unspecified (incl cysts and polyps) |
| Investigations                                                      | Reverse tri-iodothyronine increased | 1     | Pernicious anaemia              | Blood and lymphatic system disorders                                |
| Respiratory, thoracic and mediastinal disorders                     | Suffocation feeling                 | 1     | Cor pulmonale                   | Cardiac disorders                                                   |
| Eye disorders                                                       | Glare                               | 1     | Conjunctival cyst               | Eye disorders                                                       |
| Investigations                                                      | Neutrophil percentage decreased     | 1     | Myelocyte count increased       | Investigations                                                      |
| Neoplasms benign, malignant and unspecified (incl cysts and polyps) | Oesophageal neoplasm                | 1     | Gastric atony                   | Gastrointestinal disorders                                          |
| Infections and infestations                                         | Cerebral toxoplasmosis              | 1     | Cellulitis staphylococcal       | Infections and infestations                                         |
| Nervous system disorders                                            | Neurodegenerative disorder          | 1     | Acquired afibrinogenaemia       | Blood and lymphatic system disorders                                |
| Investigations                                                      | Hepatic enzyme                      | 1     | Adult T-cell lymphoma/leukaemia | Neoplasms benign, malignant and unspecified (incl cysts and polyps) |
| Eye disorders                                                       | Corneal scar                        | 1     | Lennox-Gastaut syndrome         | Nervous system disorders                                            |
| Neoplasms benign, malignant and unspecified (incl cysts and polyps) | Anaplastic thyroid cancer           | 1     | Migraine with aura              | Nervous system disorders                                            |
| Psychiatric disorders                                               | Thought blocking                    | 1     | Morose                          | Psychiatric disorders                                               |
| Skin and subcutaneous tissue disorders                              | Urticaria vesiculosa                | 1     | Enterocolitis infectious        | Infections and infestations                                         |
| Investigations                                                      | Glycosylated haemoglobin decreased  | 1     | Buttock pain                    | Musculoskeletal and connective tissue disorders                     |
| Congenital, familial and genetic disorders                          | Congenital brain damage             | 1     | Renal infarct                   | Renal and urinary disorders                                         |
| Neoplasms benign, malignant and unspecified (incl cysts and polyps) | Adult T-cell lymphoma/leukaemia     | 1     | Metastatic neoplasm             | Neoplasms benign, malignant and unspecified (incl cysts and polyps) |
| Infections and infestations                                         | Leishmaniasis                       | 1     | Cellulitis staphylococcal       | Infections and infestations                                         |
| Musculoskeletal and connective tissue disorders                     | Muscle contracture                  | 1     | Pulmonary thrombosis            | Respiratory, thoracic and mediastinal disorders                     |

| Basis data for network                                              |                              |       |                                    |                                                                     |
|---------------------------------------------------------------------|------------------------------|-------|------------------------------------|---------------------------------------------------------------------|
| SOC1                                                                | AE1                          | score | AE2                                | SOC2                                                                |
| Infections and infestations                                         | Candida sepsis               | 1     | Glucose tolerance test abnormal    | Investigations                                                      |
| Neoplasms benign, malignant and unspecified (incl cysts and polyps) | Adrenal neoplasm             | 1     | Blood viscosity increased          | Investigations                                                      |
| Infections and infestations                                         | Enterocolitis infectious     | 1     | Pneumonia viral                    | Infections and infestations                                         |
| Infections and infestations                                         | Meningitis cryptococcal      | 1     | Leishmaniasis                      | Infections and infestations                                         |
| Neoplasms benign, malignant and unspecified (incl cysts and polyps) | Parathyroid tumour benign    | 1     | Creutzfeldt-Jakob disease          | Infections and infestations                                         |
| Infections and infestations                                         | Cellulitis staphylococcal    | 1     | Meningitis cryptococcal            | Infections and infestations                                         |
| Investigations                                                      | Hepatic enzyme               | 1     | Bilirubin urine                    | Investigations                                                      |
| Nervous system disorders                                            | Cerebellar haemorrhage       | 1     | Blood catecholamines increased     | Investigations                                                      |
| Infections and infestations                                         | Disseminated tuberculosis    | 1     | Adult T-cell lymphoma/leukaemia    | Neoplasms benign, malignant and unspecified (incl cysts and polyps) |
| Infections and infestations                                         | Meningitis cryptococcal      | 1     | Anal cancer                        | Neoplasms benign, malignant and unspecified (incl cysts and polyps) |
| Nervous system disorders                                            | Toxic induced encephalopathy | 1     | Aura                               | Nervous system disorders                                            |
| General disorders and administration site conditions                | Application site anaesthesia | 1     | Smear cervix                       | Investigations                                                      |
| Reproductive system and breast disorders                            | Breast cyst                  | 1     | Alpha-1 anti-trypsin increased     | Investigations                                                      |
| Investigations                                                      | Smear cervix                 | 1     | Application site abscess           | Infections and infestations                                         |
| Injury, poisoning and procedural complications                      | Cartilage injury             | 1     | Lower gastrointestinal haemorrhage | Gastrointestinal disorders                                          |
| Investigations                                                      | Crystal urine present        | 1     | Dacryocystitis infective           | Infections and infestations                                         |
| Investigations                                                      | Androgens increased          | 1     | Talipes                            | Congenital, familial and genetic disorders                          |
| Renal and urinary disorders                                         | Urinary tract pain           | 1     | Aura                               | Nervous system disorders                                            |
| Investigations                                                      | Smear cervix                 | 1     | Biopsy endometrium                 | Investigations                                                      |
| General disorders and administration site conditions                | Infusion related reaction    | 1     | Adult T-cell lymphoma/leukaemia    | Neoplasms benign, malignant and unspecified (incl cysts and polyps) |



| Basis data for network                                              |                                      |       |                                        |                                                      |
|---------------------------------------------------------------------|--------------------------------------|-------|----------------------------------------|------------------------------------------------------|
| SOC1                                                                | AE1                                  | score | AE2                                    | SOC2                                                 |
| Investigations                                                      | Coagulation factor X level increased | 1     | Coagulation factor XII level increased | Investigations                                       |
| Investigations                                                      | Medication residue                   | 1     | Crystal urine present                  | Investigations                                       |
| Gastrointestinal disorders                                          | Pancreatic pseudocyst                | 1     | Glomerular vascular disorder           | Renal and urinary disorders                          |
| Investigations                                                      | Androgens increased                  | 1     | Cerebral palsy                         | Congenital, familial and genetic disorders           |
| Ear and labyrinth disorders                                         | Eustachian tube dysfunction          | 1     | Pulmonary thrombosis                   | Respiratory, thoracic and mediastinal disorders      |
| General disorders and administration site conditions                | Infusion related reaction            | 1     | Disseminated tuberculosis              | Infections and infestations                          |
| Psychiatric disorders                                               | Flat affect                          | 1     | Self mutilation                        | Injury, poisoning and procedural complications       |
| Investigations                                                      | Smear cervix                         | 1     | Application site discolouration        | General disorders and administration site conditions |
| Investigations                                                      | Blood viscosity increased            | 1     | Total cholesterol/HDL ratio decreased  | Investigations                                       |
| Injury, poisoning and procedural complications                      | Foot fracture                        | 1     | Thoracic outlet syndrome               | Nervous system disorders                             |
| Investigations                                                      | Androgens increased                  | 1     | Pancreatic necrosis                    | Gastrointestinal disorders                           |
| Investigations                                                      | Haematocrit                          | 1     | Blood electrolytes increased           | Investigations                                       |
| Investigations                                                      | Drug level changed                   | 1     | Immunoglobulins decreased              | Investigations                                       |
| Nervous system disorders                                            | Dyspraxia                            | 1     | Fibrin decreased                       | Investigations                                       |
| Nervous system disorders                                            | Neurodegenerative disorder           | 1     | Androgens increased                    | Investigations                                       |
| Neoplasms benign, malignant and unspecified (incl cysts and polyps) | Adult T-cell lymphoma/leukaemia      | 1     | HIV infection                          | Infections and infestations                          |
| Investigations                                                      | Androgens increased                  | 1     | Acquired afibrinogenaemia              | Blood and lymphatic system disorders                 |
| Nervous system disorders                                            | Aura                                 | 1     | Periarticular disorder                 | Musculoskeletal and connective tissue disorders      |
| Investigations                                                      | Blood testosterone free increased    | 1     | Aura                                   | Nervous system disorders                             |
| Investigations                                                      | Histone antibody positive            | 1     | Aura                                   | Nervous system disorders                             |

| Basis data for network                                              |                                    |       |                                 |                                                                     |
|---------------------------------------------------------------------|------------------------------------|-------|---------------------------------|---------------------------------------------------------------------|
| SOC1                                                                | AE1                                | score | AE2                             | SOC2                                                                |
| Skin and subcutaneous tissue disorders                              | Milia                              | 1     | Urticaria vesiculosa            | Skin and subcutaneous tissue disorders                              |
| Metabolism and nutrition disorders                                  | Oligodipsia                        | 1     | Aura                            | Nervous system disorders                                            |
| Infections and infestations                                         | Meningitis cryptococcal            | 1     | Cytomegalovirus colitis         | Infections and infestations                                         |
| Nervous system disorders                                            | Aura                               | 1     | Atonic seizures                 | Nervous system disorders                                            |
| Infections and infestations                                         | Cerebral toxoplasmosis             | 1     | Meningitis cryptococcal         | Infections and infestations                                         |
| Respiratory, thoracic and mediastinal disorders                     | Pulmonary thrombosis               | 1     | Diabetic retinopathy            | Eye disorders                                                       |
| Infections and infestations                                         | Pelvic abscess                     | 1     | Neutrophil percentage decreased | Investigations                                                      |
| Congenital, familial and genetic disorders                          | Congenital great vessel anomaly    | 1     | Acne fulminans                  | Skin and subcutaneous tissue disorders                              |
| Musculoskeletal and connective tissue disorders                     | Morphoea                           | 1     | Uterine contractions abnormal   | Pregnancy, puerperium and perinatal conditions                      |
| Cardiac disorders                                                   | Cardiac amyloidosis                | 1     | Large intestinal obstruction    | Gastrointestinal disorders                                          |
| Metabolism and nutrition disorders                                  | Copper deficiency                  | 1     | Sjogren's syndrome              | Musculoskeletal and connective tissue disorders                     |
| General disorders and administration site conditions                | Catheter site haemorrhage          | 1     | Peridiverticular abscess        | Infections and infestations                                         |
| General disorders and administration site conditions                | Catheter site haemorrhage          | 1     | Lung infection pseudomonal      | Infections and infestations                                         |
| Neoplasms benign, malignant and unspecified (incl cysts and polyps) | Malignant melanoma in situ         | 1     | Duodenal neoplasm               | Neoplasms benign, malignant and unspecified (incl cysts and polyps) |
| Skin and subcutaneous tissue disorders                              | Ingrown hair                       | 1     | Pseudofolliculitis barbae       | Infections and infestations                                         |
| Hepatobiliary disorders                                             | Budd-Chiari syndrome               | 1     | Hepatic vein thrombosis         | Hepatobiliary disorders                                             |
| Gastrointestinal disorders                                          | Lower gastrointestinal haemorrhage | 1     | Gastroduodenal haemorrhage      | Gastrointestinal disorders                                          |
| Nervous system disorders                                            | Grimacing                          | 1     | Cerebral haematoma              | Nervous system disorders                                            |
| Respiratory, thoracic and mediastinal disorders                     | Pulmonary microemboli              | 1     | Fibrous dysplasia of bone       | Congenital, familial and genetic disorders                          |
| General disorders and administration site conditions                | Infusion site warmth               | 1     | Injection site pustule          | Infections and infestations                                         |

| Basis data for network                                              |                                      |       |                                      |                                                                     |
|---------------------------------------------------------------------|--------------------------------------|-------|--------------------------------------|---------------------------------------------------------------------|
| SOC1                                                                | AE1                                  | score | AE2                                  | SOC2                                                                |
| Ear and labyrinth disorders                                         | Eustachian tube dysfunction          | 1     | Muscle contracture                   | Musculoskeletal and connective tissue disorders                     |
| Gastrointestinal disorders                                          | Gastric atony                        | 1     | Rectal neoplasm                      | Neoplasms benign, malignant and unspecified (incl cysts and polyps) |
| Metabolism and nutrition disorders                                  | Hypozincaemia                        | 1     | Goodpasture's syndrome               | Renal and urinary disorders                                         |
| Renal and urinary disorders                                         | Goodpasture's syndrome               | 1     | Sjogren's syndrome                   | Musculoskeletal and connective tissue disorders                     |
| Nervous system disorders                                            | Thoracic outlet syndrome             | 1     | Sickle cell anaemia                  | Congenital, familial and genetic disorders                          |
| Infections and infestations                                         | Application site abscess             | 1     | Biopsy endometrium                   | Investigations                                                      |
| Investigations                                                      | Troponin increased                   | 1     | Milia                                | Skin and subcutaneous tissue disorders                              |
| Nervous system disorders                                            | Lennox-Gastaut syndrome              | 1     | Dyspraxia                            | Nervous system disorders                                            |
| Congenital, familial and genetic disorders                          | Inborn error of metabolism           | 1     | Urine osmolality decreased           | Investigations                                                      |
| Infections and infestations                                         | Viral sinusitis                      | 1     | Ear infection viral                  | Infections and infestations                                         |
| Investigations                                                      | Electrocardiogram PQ interval        | 1     | Electrocardiogram U-wave abnormality | Investigations                                                      |
| Injury, poisoning and procedural complications                      | Wrist fracture                       | 1     | Oral infection                       | Infections and infestations                                         |
| Neoplasms benign, malignant and unspecified (incl cysts and polyps) | Rectal neoplasm                      | 1     | Oesophageal neoplasm                 | Neoplasms benign, malignant and unspecified (incl cysts and polyps) |
| Respiratory, thoracic and mediastinal disorders                     | Lower respiratory tract inflammation | 1     | Scrotal ulcer                        | Reproductive system and breast disorders                            |
| Infections and infestations                                         | Enterococcal bacteraemia             | 1     | Glucose tolerance test abnormal      | Investigations                                                      |
| Respiratory, thoracic and mediastinal disorders                     | Laryngeal obstruction                | 1     | Blood chromium decreased             | Investigations                                                      |
| Musculoskeletal and connective tissue disorders                     | Tendon calcification                 | 1     | Congenital great vessel anomaly      | Congenital, familial and genetic disorders                          |
| Respiratory, thoracic and mediastinal disorders                     | Allergic sinusitis                   | 1     | Dysstasia                            | Nervous system disorders                                            |
| Gastrointestinal disorders                                          | Pancreatic necrosis                  | 1     | Neurodegenerative disorder           | Nervous system disorders                                            |
| Musculoskeletal and connective tissue disorders                     | Buttock pain                         | 1     | Periorbital haematoma                | Injury, poisoning and procedural complications                      |

| Basis data for network                                              |                                  |       |                                             |                                                                     |
|---------------------------------------------------------------------|----------------------------------|-------|---------------------------------------------|---------------------------------------------------------------------|
| SOC1                                                                | AE1                              | score | AE2                                         | SOC2                                                                |
| Neoplasms benign, malignant and unspecified (incl cysts and polyps) | Choriocarcinoma                  | 1     | Tongue neoplasm malignant stage unspecified | Neoplasms benign, malignant and unspecified (incl cysts and polyps) |
| Respiratory, thoracic and mediastinal disorders                     | Respiratory tract haemorrhage    | 1     | Enterocolitis infectious                    | Infections and infestations                                         |
| General disorders and administration site conditions                | Hypertrophy                      | 1     | Hypopyon                                    | Infections and infestations                                         |
| Psychiatric disorders                                               | Blunted affect                   | 1     | Spontaneous penile erection                 | Reproductive system and breast disorders                            |
| Investigations                                                      | Capillary fragility increased    | 1     | Pulmonary thrombosis                        | Respiratory, thoracic and mediastinal disorders                     |
| Metabolism and nutrition disorders                                  | Copper deficiency                | 1     | Hypozaemia                                  | Metabolism and nutrition disorders                                  |
| Skin and subcutaneous tissue disorders                              | Milia                            | 1     | Platelet aggregation abnormal               | Investigations                                                      |
| Investigations                                                      | Urine potassium decreased        | 1     | Urine sodium decreased                      | Investigations                                                      |
| Musculoskeletal and connective tissue disorders                     | Joint ankylosis                  | 1     | Thoracic outlet syndrome                    | Nervous system disorders                                            |
| Infections and infestations                                         | Abdominal abscess                | 1     | Infusion site warmth                        | General disorders and administration site conditions                |
| Investigations                                                      | Blood immunoglobulin A decreased | 1     | Thought blocking                            | Psychiatric disorders                                               |
| Nervous system disorders                                            | Thoracic outlet syndrome         | 1     | Lacunar infarction                          | Nervous system disorders                                            |
| Endocrine disorders                                                 | Parathyroid gland enlargement    | 1     | Cerebellar atrophy                          | Nervous system disorders                                            |
| Endocrine disorders                                                 | Acromegaly                       | 1     | Blood antidiuretic hormone decreased        | Investigations                                                      |
| Investigations                                                      | Platelet aggregation abnormal    | 1     | Urticaria vesiculosa                        | Skin and subcutaneous tissue disorders                              |
| Neoplasms benign, malignant and unspecified (incl cysts and polyps) | Melanocytic naevus               | 1     | Intertrigo                                  | Skin and subcutaneous tissue disorders                              |
| Infections and infestations                                         | Peridiverticular abscess         | 1     | Mediastinal disorder                        | Respiratory, thoracic and mediastinal disorders                     |
| Congenital, familial and genetic disorders                          | Aplasia cutis congenita          | 1     | Choanal atresia                             | Congenital, familial and genetic disorders                          |
| Injury, poisoning and procedural complications                      | Compression fracture             | 1     | Immunoglobulins decreased                   | Investigations                                                      |
| Respiratory, thoracic and mediastinal disorders                     | Mediastinal disorder             | 1     | Lung infection pseudomonal                  | Infections and infestations                                         |

| Basis data for network                                              |                                 |       |                                 |                                                                     |
|---------------------------------------------------------------------|---------------------------------|-------|---------------------------------|---------------------------------------------------------------------|
| SOC1                                                                | AE1                             | score | AE2                             | SOC2                                                                |
| Infections and infestations                                         | Disseminated tuberculosis       | 1     | Bile duct cancer                | Neoplasms benign, malignant and unspecified (incl cysts and polyps) |
| Investigations                                                      | Bilirubin urine                 | 1     | Disseminated tuberculosis       | Infections and infestations                                         |
| Neoplasms benign, malignant and unspecified (incl cysts and polyps) | Pituitary tumour                | 1     | Anal atresia                    | Congenital, familial and genetic disorders                          |
| Infections and infestations                                         | Salpingo-oophoritis             | 1     | Acute sinusitis                 | Infections and infestations                                         |
| Infections and infestations                                         | Eczema infected                 | 1     | Myringitis                      | Infections and infestations                                         |
| General disorders and administration site conditions                | Application site anaesthesia    | 1     | Application site abscess        | Infections and infestations                                         |
| Renal and urinary disorders                                         | Renal necrosis                  | 1     | Creatinine renal clearance      | Investigations                                                      |
| Infections and infestations                                         | Escherichia bacteraemia         | 1     | Adult T-cell lymphoma/leukaemia | Neoplasms benign, malignant and unspecified (incl cysts and polyps) |
| General disorders and administration site conditions                | Application site warmth         | 1     | Lice infestation                | Infections and infestations                                         |
| Injury, poisoning and procedural complications                      | Wrist fracture                  | 1     | Breast cancer female            | Neoplasms benign, malignant and unspecified (incl cysts and polyps) |
| Infections and infestations                                         | Creutzfeldt-Jakob disease       | 1     | Aortic valve stenosis           | Cardiac disorders                                                   |
| Injury, poisoning and procedural complications                      | Tendon injury                   | 1     | Scoliosis                       | Musculoskeletal and connective tissue disorders                     |
| Investigations                                                      | Neutrophil percentage decreased | 1     | Infusion site warmth            | General disorders and administration site conditions                |
| Skin and subcutaneous tissue disorders                              | Red man syndrome                | 1     | Tear discolouration             | Eye disorders                                                       |
| Investigations                                                      | Blood glucose fluctuation       | 1     | Eye degenerative disorder       | Eye disorders                                                       |
| Congenital, familial and genetic disorders                          | Talipes                         | 1     | Clinodactyly                    | Congenital, familial and genetic disorders                          |
| Infections and infestations                                         | Gingival infection              | 1     | Thoracic outlet syndrome        | Nervous system disorders                                            |
| Infections and infestations                                         | Enterococcal bacteraemia        | 1     | Disseminated tuberculosis       | Infections and infestations                                         |
| Infections and infestations                                         | Dacryocystitis infective        | 1     | Medication residue              | Investigations                                                      |
| General disorders and administration site conditions                | Application site anaesthesia    | 1     | Biopsy endometrium              | Investigations                                                      |

| Basis data for network                                              |                                        |       |                                         |                                                                     |
|---------------------------------------------------------------------|----------------------------------------|-------|-----------------------------------------|---------------------------------------------------------------------|
| SOC1                                                                | AE1                                    | score | AE2                                     | SOC2                                                                |
| Skin and subcutaneous tissue disorders                              | Urticaria vesiculosa                   | 1     | Troponin increased                      | Investigations                                                      |
| Musculoskeletal and connective tissue disorders                     | Osteitis deformans                     | 1     | Viral upper respiratory tract infection | Infections and infestations                                         |
| Congenital, familial and genetic disorders                          | Moebius II syndrome                    | 1     | Congenital hydrocephalus                | Congenital, familial and genetic disorders                          |
| Nervous system disorders                                            | Dysstasia                              | 1     | Sensation of foreign body               | General disorders and administration site conditions                |
| Infections and infestations                                         | Candida sepsis                         | 1     | Disseminated tuberculosis               | Infections and infestations                                         |
| Skin and subcutaneous tissue disorders                              | Milia                                  | 1     | Enterocolitis infectious                | Infections and infestations                                         |
| Investigations                                                      | Urine vitamin K decreased              | 1     | Tear discolouration                     | Eye disorders                                                       |
| Investigations                                                      | Coagulation factor XII level increased | 1     | Adenosquamous carcinoma of the cervix   | Neoplasms benign, malignant and unspecified (incl cysts and polyps) |
| Investigations                                                      | Glycosylated haemoglobin increased     | 1     | Glycosylated haemoglobin decreased      | Investigations                                                      |
| Infections and infestations                                         | Helicobacter infection                 | 1     | Thoracic outlet syndrome                | Nervous system disorders                                            |
| Infections and infestations                                         | Dengue fever                           | 1     | Vogt-Koyanagi-Harada syndrome           | Eye disorders                                                       |
| Eye disorders                                                       | Optic disc disorder                    | 1     | Chorioretinal atrophy                   | Eye disorders                                                       |
| Nervous system disorders                                            | Neurodegenerative disorder             | 1     | Clinodactyly                            | Congenital, familial and genetic disorders                          |
| Renal and urinary disorders                                         | Renal tubular atrophy                  | 1     | Dengue fever                            | Infections and infestations                                         |
| Skin and subcutaneous tissue disorders                              | Lichenification                        | 1     | Supernumerary nipple                    | Congenital, familial and genetic disorders                          |
| Neoplasms benign, malignant and unspecified (incl cysts and polyps) | Parathyroid tumour                     | 1     | Thoracic outlet syndrome                | Nervous system disorders                                            |
| Investigations                                                      | Creatinine renal clearance             | 1     | Anal injury                             | Injury, poisoning and procedural complications                      |
| Eye disorders                                                       | Anterior chamber disorder              | 1     | Choroiditis                             | Eye disorders                                                       |
| Infections and infestations                                         | Enterococcal bacteraemia               | 1     | White blood cell count                  | Investigations                                                      |
| Infections and infestations                                         | Disseminated tuberculosis              | 1     | Glucose tolerance test abnormal         | Investigations                                                      |

| Basis data for network                                              |                                       |       |                                 |                                                                     |
|---------------------------------------------------------------------|---------------------------------------|-------|---------------------------------|---------------------------------------------------------------------|
| SOC1                                                                | AE1                                   | score | AE2                             | SOC2                                                                |
| Nervous system disorders                                            | Hypoxic encephalopathy                | 1     | Urinary tract malformation      | Congenital, familial and genetic disorders                          |
| General disorders and administration site conditions                | Microlithiasis                        | 1     | Renal abscess                   | Infections and infestations                                         |
| Congenital, familial and genetic disorders                          | Congenital hydrocephalus              | 1     | Foetal cerebrovascular disorder | Nervous system disorders                                            |
| Gastrointestinal disorders                                          | Sensitivity of teeth                  | 1     | Tongue dry                      | Gastrointestinal disorders                                          |
| Infections and infestations                                         | Breast cellulitis                     | 1     | Bone neoplasm                   | Neoplasms benign, malignant and unspecified (incl cysts and polyps) |
| Renal and urinary disorders                                         | Renal necrosis                        | 1     | Anal injury                     | Injury, poisoning and procedural complications                      |
| Reproductive system and breast disorders                            | Ovarian fibrosis                      | 1     | Craniosynostosis                | Musculoskeletal and connective tissue disorders                     |
| Investigations                                                      | Blood glucose fluctuation             | 1     | Eustachian tube dysfunction     | Ear and labyrinth disorders                                         |
| Infections and infestations                                         | Neurocysticercosis                    | 1     | Echinococcosis                  | Infections and infestations                                         |
| Reproductive system and breast disorders                            | Spontaneous penile erection           | 1     | Flat affect                     | Psychiatric disorders                                               |
| Neoplasms benign, malignant and unspecified (incl cysts and polyps) | Blast crisis in myelogenous leukaemia | 1     | Venous pressure decreased       | Investigations                                                      |
| Infections and infestations                                         | Disseminated tuberculosis             | 1     | Metastatic neoplasm             | Neoplasms benign, malignant and unspecified (incl cysts and polyps) |
| Cardiac disorders                                                   | Cardiac arrest neonatal               | 1     | Antimitochondrial antibody      | Investigations                                                      |
| Neoplasms benign, malignant and unspecified (incl cysts and polyps) | Metastases to lung                    | 1     | Disseminated tuberculosis       | Infections and infestations                                         |
| Investigations                                                      | Fibrin decreased                      | 1     | Corneal scar                    | Eye disorders                                                       |
| Injury, poisoning and procedural complications                      | Anastomotic ulcer                     | 1     | Gallbladder pain                | Hepatobiliary disorders                                             |
| Investigations                                                      | Blood pressure orthostatic abnormal   | 1     | Semen viscosity abnormal        | Investigations                                                      |
| Infections and infestations                                         | Disseminated tuberculosis             | 1     | White blood cell count          | Investigations                                                      |
| Nervous system disorders                                            | Spinal claudication                   | 1     | Stress fracture                 | Injury, poisoning and procedural complications                      |
| Musculoskeletal and connective tissue disorders                     | Mobility decreased                    | 1     | Nerve compression               | Nervous system disorders                                            |

| Basis data for network                                              |                                             |       |                                       |                                                                     |
|---------------------------------------------------------------------|---------------------------------------------|-------|---------------------------------------|---------------------------------------------------------------------|
| SOC1                                                                | AE1                                         | score | AE2                                   | SOC2                                                                |
| Neoplasms benign, malignant and unspecified (incl cysts and polyps) | Bile duct cancer                            | 1     | Metastatic neoplasm                   | Neoplasms benign, malignant and unspecified (incl cysts and polyps) |
| Congenital, familial and genetic disorders                          | Clinodactyly                                | 1     | Acquired afibrinogenaemia             | Blood and lymphatic system disorders                                |
| Cardiac disorders                                                   | Cardiac asthma                              | 1     | Pulmonary arterial pressure increased | Investigations                                                      |
| Investigations                                                      | Bilirubin urine                             | 1     | Metastatic neoplasm                   | Neoplasms benign, malignant and unspecified (incl cysts and polyps) |
| Eye disorders                                                       | Keratitis interstitial                      | 1     | Tuberculosis of eye                   | Infections and infestations                                         |
| Metabolism and nutrition disorders                                  | Hypoglycaemia unawareness                   | 1     | Chondrodystrophy                      | Congenital, familial and genetic disorders                          |
| Respiratory, thoracic and mediastinal disorders                     | Nocturnal dyspnoea                          | 1     | Sensation of foreign body             | General disorders and administration site conditions                |
| Investigations                                                      | Glycosylated haemoglobin increased          | 1     | Mastication disorder                  | Nervous system disorders                                            |
| Neoplasms benign, malignant and unspecified (incl cysts and polyps) | Tongue neoplasm malignant stage unspecified | 1     | Glioblastoma multiforme               | Neoplasms benign, malignant and unspecified (incl cysts and polyps) |
| Skin and subcutaneous tissue disorders                              | Acanthosis nigricans                        | 1     | Fibrinolysis                          | Investigations                                                      |
| Gastrointestinal disorders                                          | Gingival swelling                           | 1     | Deafness transitory                   | Ear and labyrinth disorders                                         |
| Infections and infestations                                         | Acquired immunodeficiency syndrome          | 1     | Cytomegalovirus chorioretinitis       | Infections and infestations                                         |
| Investigations                                                      | Venous pressure increased                   | 1     | Blood cholinesterase decreased        | Investigations                                                      |
| Musculoskeletal and connective tissue disorders                     | Senile ankylosing vertebral hyperostosis    | 1     | Supernumerary nipple                  | Congenital, familial and genetic disorders                          |
| Congenital, familial and genetic disorders                          | Cerebral palsy                              | 1     | Talipes                               | Congenital, familial and genetic disorders                          |
| Respiratory, thoracic and mediastinal disorders                     | Allergic sinusitis                          | 1     | Nocturnal dyspnoea                    | Respiratory, thoracic and mediastinal disorders                     |
| Investigations                                                      | Bilirubin urine                             | 1     | HIV infection                         | Infections and infestations                                         |
| Neoplasms benign, malignant and unspecified (incl cysts and polyps) | Bile duct cancer                            | 1     | HIV infection                         | Infections and infestations                                         |
| Skin and subcutaneous tissue disorders                              | Milia                                       | 1     | Respiratory tract haemorrhage         | Respiratory, thoracic and mediastinal disorders                     |
| Eye disorders                                                       | Posterior capsule opacification             | 1     | Tendon injury                         | Injury, poisoning and procedural complications                      |



| Basis data for network                                              |                                 |       |                                          |                                                                     |
|---------------------------------------------------------------------|---------------------------------|-------|------------------------------------------|---------------------------------------------------------------------|
| SOC1                                                                | AE1                             | score | AE2                                      | SOC2                                                                |
| Investigations                                                      | Urine osmolarity decreased      | 1     | Joint destruction                        | Musculoskeletal and connective tissue disorders                     |
| Investigations                                                      | Lipoprotein (a) decreased       | 1     | Cervix neoplasm                          | Neoplasms benign, malignant and unspecified (incl cysts and polyps) |
| Nervous system disorders                                            | Neuralgic amyotrophy            | 1     | Fibrin decreased                         | Investigations                                                      |
| Neoplasms benign, malignant and unspecified (incl cysts and polyps) | Anal cancer                     | 1     | Cerebral toxoplasmosis                   | Infections and infestations                                         |
| Neoplasms benign, malignant and unspecified (incl cysts and polyps) | Choriocarcinoma                 | 1     | Malignant hydatidiform mole              | Neoplasms benign, malignant and unspecified (incl cysts and polyps) |
| Musculoskeletal and connective tissue disorders                     | Dwarfism                        | 1     | Choriocarcinoma                          | Neoplasms benign, malignant and unspecified (incl cysts and polyps) |
| Neoplasms benign, malignant and unspecified (incl cysts and polyps) | Lymphoma cutis                  | 1     | Senile ankylosing vertebral hyperostosis | Musculoskeletal and connective tissue disorders                     |
| Neoplasms benign, malignant and unspecified (incl cysts and polyps) | Testis cancer                   | 1     | Coagulation factor XII level increased   | Investigations                                                      |
| Nervous system disorders                                            | Monoparesis                     | 1     | Gastroesophagitis                        | Gastrointestinal disorders                                          |
| Injury, poisoning and procedural complications                      | Brain herniation                | 1     | Lumbosacral plexus lesion                | Nervous system disorders                                            |
| Musculoskeletal and connective tissue disorders                     | Buttock pain                    | 1     | Mastication disorder                     | Nervous system disorders                                            |
| Skin and subcutaneous tissue disorders                              | Lichenification                 | 1     | Lymphoma cutis                           | Neoplasms benign, malignant and unspecified (incl cysts and polyps) |
| Injury, poisoning and procedural complications                      | Ulnar nerve injury              | 1     | Foot fracture                            | Injury, poisoning and procedural complications                      |
| Nervous system disorders                                            | Dizziness exertional            | 1     | Glycosylated haemoglobin increased       | Investigations                                                      |
| Infections and infestations                                         | Enterococcal bacteraemia        | 1     | Metastases to lung                       | Neoplasms benign, malignant and unspecified (incl cysts and polyps) |
| Investigations                                                      | Neutrophil percentage decreased | 1     | Abdominal abscess                        | Infections and infestations                                         |
| Infections and infestations                                         | Cytomegalovirus colitis         | 1     | Anal cancer                              | Neoplasms benign, malignant and unspecified (incl cysts and polyps) |
| Nervous system disorders                                            | Subdural effusion               | 1     | Cerebral cyst                            | Nervous system disorders                                            |
| Ear and labyrinth disorders                                         | Eustachian tube dysfunction     | 1     | Lip haemorrhage                          | Gastrointestinal disorders                                          |
| Congenital, familial and genetic disorders                          | Sickle cell anaemia             | 1     | Ulnar nerve injury                       | Injury, poisoning and procedural complications                      |

| Basis data for network                                              |                                          |       |                                     |                                                                     |
|---------------------------------------------------------------------|------------------------------------------|-------|-------------------------------------|---------------------------------------------------------------------|
| SOC1                                                                | AE1                                      | score | AE2                                 | SOC2                                                                |
| Congenital, familial and genetic disorders                          | Talipes                                  | 1     | Pseudocyst                          | General disorders and administration site conditions                |
| Skin and subcutaneous tissue disorders                              | Milia                                    | 1     | Pneumonia viral                     | Infections and infestations                                         |
| Congenital, familial and genetic disorders                          | Congenital hydrocephalus                 | 1     | Microtia                            | Congenital, familial and genetic disorders                          |
| Musculoskeletal and connective tissue disorders                     | Neck mass                                | 1     | Pulmonary thrombosis                | Respiratory, thoracic and mediastinal disorders                     |
| Injury, poisoning and procedural complications                      | Tendon injury                            | 1     | Laryngeal obstruction               | Respiratory, thoracic and mediastinal disorders                     |
| Infections and infestations                                         | Leishmaniasis                            | 1     | Anal cancer                         | Neoplasms benign, malignant and unspecified (incl cysts and polyps) |
| Nervous system disorders                                            | Neuralgic amyotrophy                     | 1     | Dyspraxia                           | Nervous system disorders                                            |
| Nervous system disorders                                            | Toxic induced encephalopathy             | 1     | Myeloid maturation arrest           | Blood and lymphatic system disorders                                |
| Infections and infestations                                         | Oral fungal infection                    | 1     | Bradycardia neonatal                | Cardiac disorders                                                   |
| Gastrointestinal disorders                                          | Mallory-Weiss syndrome                   | 1     | Factor V deficiency                 | Congenital, familial and genetic disorders                          |
| Eye disorders                                                       | Heterophoria                             | 1     | Tongue biting                       | Nervous system disorders                                            |
| Congenital, familial and genetic disorders                          | Anal atresia                             | 1     | Choriocarcinoma                     | Neoplasms benign, malignant and unspecified (incl cysts and polyps) |
| Investigations                                                      | Hepatic enzyme                           | 1     | Disseminated tuberculosis           | Infections and infestations                                         |
| Musculoskeletal and connective tissue disorders                     | Senile ankylosing vertebral hyperostosis | 1     | Intervertebral disc space narrowing | Musculoskeletal and connective tissue disorders                     |
| Eye disorders                                                       | Diabetic retinopathy                     | 1     | Blood glucose fluctuation           | Investigations                                                      |
| Injury, poisoning and procedural complications                      | Scratch                                  | 1     | Parkinsonian rest tremor            | Nervous system disorders                                            |
| Musculoskeletal and connective tissue disorders                     | Intervertebral disc space narrowing      | 1     | Lichenification                     | Skin and subcutaneous tissue disorders                              |
| Injury, poisoning and procedural complications                      | Foot fracture                            | 1     | Sickle cell anaemia with crisis     | Congenital, familial and genetic disorders                          |
| Eye disorders                                                       | Cyanopsia                                | 1     | Oppositional defiant disorder       | Psychiatric disorders                                               |
| Neoplasms benign, malignant and unspecified (incl cysts and polyps) | Bronchial carcinoma                      | 1     | Pneumoconiosis                      | Injury, poisoning and procedural complications                      |

| Basis data for network                                              |                                          |       |                                           |                                                                     |
|---------------------------------------------------------------------|------------------------------------------|-------|-------------------------------------------|---------------------------------------------------------------------|
| SOC1                                                                | AE1                                      | score | AE2                                       | SOC2                                                                |
| Investigations                                                      | Haematocrit                              | 1     | Haemoglobin                               | Investigations                                                      |
| Vascular disorders                                                  | Aortic dissection                        | 1     | Obsessive-compulsive personality disorder | Psychiatric disorders                                               |
| Metabolism and nutrition disorders                                  | Hypozincaemia                            | 1     | Collagen disorder                         | Musculoskeletal and connective tissue disorders                     |
| Musculoskeletal and connective tissue disorders                     | Collagen disorder                        | 1     | Sjogren's syndrome                        | Musculoskeletal and connective tissue disorders                     |
| Nervous system disorders                                            | Neurodegenerative disorder               | 1     | Talipes                                   | Congenital, familial and genetic disorders                          |
| Infections and infestations                                         | Trichomoniasis                           | 1     | Smear cervix                              | Investigations                                                      |
| Nervous system disorders                                            | Mononeuritis                             | 1     | Sudden infant death syndrome              | General disorders and administration site conditions                |
| Injury, poisoning and procedural complications                      | Tendon injury                            | 1     | Blood chromium decreased                  | Investigations                                                      |
| Musculoskeletal and connective tissue disorders                     | Senile ankylosing vertebral hyperostosis | 1     | Haptoglobin decreased                     | Investigations                                                      |
| Skin and subcutaneous tissue disorders                              | Lichenification                          | 1     | Haptoglobin decreased                     | Investigations                                                      |
| Congenital, familial and genetic disorders                          | Pierre Robin syndrome                    | 1     | Bradycardia neonatal                      | Cardiac disorders                                                   |
| Injury, poisoning and procedural complications                      | Compression fracture                     | 1     | Drug level changed                        | Investigations                                                      |
| Eye disorders                                                       | Conjunctival ulcer                       | 1     | Hypopyon                                  | Infections and infestations                                         |
| Infections and infestations                                         | Urogenital trichomoniasis                | 1     | Vulvovaginitis trichomonal                | Infections and infestations                                         |
| Infections and infestations                                         | Pseudomonal sepsis                       | 1     | Adult T-cell lymphoma/leukaemia           | Neoplasms benign, malignant and unspecified (incl cysts and polyps) |
| Congenital, familial and genetic disorders                          | Sickle cell anaemia with crisis          | 1     | Thoracic outlet syndrome                  | Nervous system disorders                                            |
| Infections and infestations                                         | Bacterial sepsis                         | 1     | Adult T-cell lymphoma/leukaemia           | Neoplasms benign, malignant and unspecified (incl cysts and polyps) |
| Neoplasms benign, malignant and unspecified (incl cysts and polyps) | Breast cancer female                     | 1     | Median nerve lesion                       | Nervous system disorders                                            |
| Gastrointestinal disorders                                          | Pancreatic necrosis                      | 1     | Abulia                                    | Psychiatric disorders                                               |
| Investigations                                                      | Haematocrit                              | 1     | Electrophoresis abnormal                  | Investigations                                                      |

| Basis data for network                                              |                                     |       |                                 |                                                                     |
|---------------------------------------------------------------------|-------------------------------------|-------|---------------------------------|---------------------------------------------------------------------|
| SOC1                                                                | AE1                                 | score | AE2                             | SOC2                                                                |
| Congenital, familial and genetic disorders                          | Aplasia cutis congenita             | 1     | Insulin autoimmune syndrome     | Immune system disorders                                             |
| Eye disorders                                                       | Anterior chamber disorder           | 1     | Lymph node pain                 | Blood and lymphatic system disorders                                |
| Neoplasms benign, malignant and unspecified (incl cysts and polyps) | Adult T-cell lymphoma/leukaemia     | 1     | Bilirubin urine                 | Investigations                                                      |
| Neoplasms benign, malignant and unspecified (incl cysts and polyps) | Adult T-cell lymphoma/leukaemia     | 1     | Bile duct cancer                | Neoplasms benign, malignant and unspecified (incl cysts and polyps) |
| Congenital, familial and genetic disorders                          | Clinodactyly                        | 1     | Androgens increased             | Investigations                                                      |
| Infections and infestations                                         | Candida sepsis                      | 1     | Adult T-cell lymphoma/leukaemia | Neoplasms benign, malignant and unspecified (incl cysts and polyps) |
| Investigations                                                      | Stroke volume increased             | 1     | Catecholamines urine increased  | Investigations                                                      |
| Infections and infestations                                         | Enterococcal bacteraemia            | 1     | Adult T-cell lymphoma/leukaemia | Neoplasms benign, malignant and unspecified (incl cysts and polyps) |
| Investigations                                                      | Blood lactate dehydrogenase         | 1     | Gamma-glutamyltransferase       | Investigations                                                      |
| Gastrointestinal disorders                                          | Tooth impacted                      | 1     | Lice infestation                | Infections and infestations                                         |
| Investigations                                                      | Smear cervix                        | 1     | Application site scar           | General disorders and administration site conditions                |
| Gastrointestinal disorders                                          | Gastroesophagitis                   | 1     | Epstein-Barr virus infection    | Infections and infestations                                         |
| Musculoskeletal and connective tissue disorders                     | Collagen disorder                   | 1     | Goodpasture's syndrome          | Renal and urinary disorders                                         |
| Infections and infestations                                         | HIV infection                       | 1     | Disseminated tuberculosis       | Infections and infestations                                         |
| Gastrointestinal disorders                                          | Dyschezia                           | 1     | Myokymia                        | Musculoskeletal and connective tissue disorders                     |
| Investigations                                                      | Haematocrit                         | 1     | Lobar pneumonia                 | Infections and infestations                                         |
| Metabolism and nutrition disorders                                  | Copper deficiency                   | 1     | Goodpasture's syndrome          | Renal and urinary disorders                                         |
| Investigations                                                      | Reverse tri-iodothyronine increased | 1     | Thyroxine free decreased        | Investigations                                                      |
| Injury, poisoning and procedural complications                      | Ligament sprain                     | 1     | Traumatic fracture              | Injury, poisoning and procedural complications                      |
| Blood and lymphatic system disorders                                | Acquired afibrinogenaemia           | 1     | Talipes                         | Congenital, familial and genetic disorders                          |

| Basis data for network                                              |                                            |       |                                           |                                                                     |
|---------------------------------------------------------------------|--------------------------------------------|-------|-------------------------------------------|---------------------------------------------------------------------|
| SOC1                                                                | AE1                                        | score | AE2                                       | SOC2                                                                |
| Infections and infestations                                         | Cellulitis staphylococcal                  | 1     | Anal cancer                               | Neoplasms benign, malignant and unspecified (incl cysts and polyps) |
| Psychiatric disorders                                               | Flat affect                                | 1     | Scratch                                   | Injury, poisoning and procedural complications                      |
| Investigations                                                      | Antiphospholipid antibodies                | 1     | Deafness congenital                       | Congenital, familial and genetic disorders                          |
| Neoplasms benign, malignant and unspecified (incl cysts and polyps) | Bone neoplasm                              | 1     | Pleural neoplasm                          | Neoplasms benign, malignant and unspecified (incl cysts and polyps) |
| Gastrointestinal disorders                                          | Lip disorder                               | 1     | Dysplasia                                 | General disorders and administration site conditions                |
| General disorders and administration site conditions                | Application site scar                      | 1     | Application site anaesthesia              | General disorders and administration site conditions                |
| Neoplasms benign, malignant and unspecified (incl cysts and polyps) | Cholesteatoma                              | 1     | Brain neoplasm malignant                  | Neoplasms benign, malignant and unspecified (incl cysts and polyps) |
| Congenital, familial and genetic disorders                          | Talipes                                    | 1     | Pancreatic necrosis                       | Gastrointestinal disorders                                          |
| Skin and subcutaneous tissue disorders                              | Urticaria vesiculosa                       | 1     | Pneumonia viral                           | Infections and infestations                                         |
| Neoplasms benign, malignant and unspecified (incl cysts and polyps) | Brain neoplasm benign                      | 1     | Malignant ovarian cyst                    | Reproductive system and breast disorders                            |
| Neoplasms benign, malignant and unspecified (incl cysts and polyps) | Duodenal neoplasm                          | 1     | Obsessive-compulsive personality disorder | Psychiatric disorders                                               |
| Gastrointestinal disorders                                          | Tooth loss                                 | 1     | Salivary gland calculus                   | Gastrointestinal disorders                                          |
| Neoplasms benign, malignant and unspecified (incl cysts and polyps) | Cholesteatoma                              | 1     | Nasopharyngeal cancer                     | Neoplasms benign, malignant and unspecified (incl cysts and polyps) |
| Nervous system disorders                                            | Dyspraxia                                  | 1     | Corneal scar                              | Eye disorders                                                       |
| Infections and infestations                                         | Ureteritis                                 | 1     | Craniosynostosis                          | Musculoskeletal and connective tissue disorders                     |
| Infections and infestations                                         | Lung infection pseudomonal                 | 1     | Catheter site erythema                    | General disorders and administration site conditions                |
| Nervous system disorders                                            | Parkinsonian rest tremor                   | 1     | Self mutilation                           | Injury, poisoning and procedural complications                      |
| Respiratory, thoracic and mediastinal disorders                     | Respiratory tract haemorrhage              | 1     | Urticaria vesiculosa                      | Skin and subcutaneous tissue disorders                              |
| Infections and infestations                                         | Peridiverticular abscess                   | 1     | Catheter site erythema                    | General disorders and administration site conditions                |
| Investigations                                                      | Red blood cell sedimentation rate abnormal | 1     | Visceral arterial ischaemia               | Vascular disorders                                                  |

| Basis data for network                                              |                                   |       |                              |                                                                     |
|---------------------------------------------------------------------|-----------------------------------|-------|------------------------------|---------------------------------------------------------------------|
| SOC1                                                                | AE1                               | score | AE2                          | SOC2                                                                |
| Neoplasms benign, malignant and unspecified (incl cysts and polyps) | Throat cancer                     | 1     | Injection site paraesthesia  | General disorders and administration site conditions                |
| Congenital, familial and genetic disorders                          | Blepharophimosis congenital       | 1     | Craniosynostosis             | Musculoskeletal and connective tissue disorders                     |
| Infections and infestations                                         | Disseminated tuberculosis         | 1     | Systemic candida             | Infections and infestations                                         |
| Gastrointestinal disorders                                          | Pancreatic pseudocyst             | 1     | Bullous impetigo             | Infections and infestations                                         |
| Nervous system disorders                                            | Thoracic outlet syndrome          | 1     | Ulnar nerve injury           | Injury, poisoning and procedural complications                      |
| Metabolism and nutrition disorders                                  | Hyperhomocysteinaemia             | 1     | Androgens increased          | Investigations                                                      |
| Investigations                                                      | Neurological examination abnormal | 1     | Tongue blistering            | Gastrointestinal disorders                                          |
| Investigations                                                      | Blood glucose fluctuation         | 1     | Pulmonary thrombosis         | Respiratory, thoracic and mediastinal disorders                     |
| Eye disorders                                                       | Retinal deposits                  | 1     | Abscess of salivary gland    | Infections and infestations                                         |
| Infections and infestations                                         | Listeriosis                       | 1     | Injection site paraesthesia  | General disorders and administration site conditions                |
| Injury, poisoning and procedural complications                      | Wrist fracture                    | 1     | Allergy to arthropod bite    | Immune system disorders                                             |
| Investigations                                                      | Thyroxine free decreased          | 1     | Pernicious anaemia           | Blood and lymphatic system disorders                                |
| Investigations                                                      | Electroencephalogram              | 1     | Poor quality sleep           | Nervous system disorders                                            |
| Metabolism and nutrition disorders                                  | Oligodipsia                       | 1     | Toxic induced encephalopathy | Nervous system disorders                                            |
| Investigations                                                      | Drug level increased              | 1     | Haematocrit                  | Investigations                                                      |
| Respiratory, thoracic and mediastinal disorders                     | Nocturnal dyspnoea                | 1     | Dysstasia                    | Nervous system disorders                                            |
| Respiratory, thoracic and mediastinal disorders                     | Pulmonary thrombosis              | 1     | Lip haemorrhage              | Gastrointestinal disorders                                          |
| Nervous system disorders                                            | Repetitive speech                 | 1     | Somatic delusion             | Psychiatric disorders                                               |
| Metabolism and nutrition disorders                                  | Hypermetabolism                   | 1     | Repetitive speech            | Nervous system disorders                                            |
| Infections and infestations                                         | Pneumonia klebsiella              | 1     | Leukaemia cutis              | Neoplasms benign, malignant and unspecified (incl cysts and polyps) |

| Basis data for network                                              |                                            |       |                               |                                                                     |
|---------------------------------------------------------------------|--------------------------------------------|-------|-------------------------------|---------------------------------------------------------------------|
| SOC1                                                                | AE1                                        | score | AE2                           | SOC2                                                                |
| Investigations                                                      | Androgens increased                        | 1     | Abulia                        | Psychiatric disorders                                               |
| Infections and infestations                                         | HIV infection                              | 1     | Infusion related reaction     | General disorders and administration site conditions                |
| General disorders and administration site conditions                | Submandibular mass                         | 1     | Kidney infection              | Infections and infestations                                         |
| Investigations                                                      | Red blood cell sedimentation rate abnormal | 1     | Prothrombin level abnormal    | Investigations                                                      |
| Eye disorders                                                       | Lid margin discharge                       | 1     | Hypopyon                      | Infections and infestations                                         |
| Investigations                                                      | Blood chromium decreased                   | 1     | Scoliosis                     | Musculoskeletal and connective tissue disorders                     |
| Psychiatric disorders                                               | Hallucination, tactile                     | 1     | Mastication disorder          | Nervous system disorders                                            |
| Metabolism and nutrition disorders                                  | Diabetes mellitus insulin-dependent        | 1     | Glomerular vascular disorder  | Renal and urinary disorders                                         |
| Nervous system disorders                                            | Intention tremor                           | 1     | Coccydynia                    | Musculoskeletal and connective tissue disorders                     |
| Neoplasms benign, malignant and unspecified (incl cysts and polyps) | Prolactinoma                               | 1     | Glioblastoma multiforme       | Neoplasms benign, malignant and unspecified (incl cysts and polyps) |
| Congenital, familial and genetic disorders                          | Mitochondrial myopathy                     | 1     | Pigmentation buccal           | Gastrointestinal disorders                                          |
| Musculoskeletal and connective tissue disorders                     | Low turnover osteopathy                    | 1     | Cerebellar atrophy            | Nervous system disorders                                            |
| Psychiatric disorders                                               | Flat affect                                | 1     | Periorbital haematoma         | Injury, poisoning and procedural complications                      |
| Investigations                                                      | Very low density lipoprotein decreased     | 1     | Injection site discolouration | General disorders and administration site conditions                |
| Investigations                                                      | Very low density lipoprotein decreased     | 1     | Vaginal cyst                  | Reproductive system and breast disorders                            |
| Injury, poisoning and procedural complications                      | Fibula fracture                            | 1     | Laryngopharyngitis            | Infections and infestations                                         |
| Infections and infestations                                         | Herpetic stomatitis                        | 1     | Myringitis                    | Infections and infestations                                         |
| Infections and infestations                                         | Pharyngeal candidiasis                     | 1     | Herpetic stomatitis           | Infections and infestations                                         |
| Psychiatric disorders                                               | Blunted affect                             | 1     | Mendelson's syndrome          | Respiratory, thoracic and mediastinal disorders                     |
| Psychiatric disorders                                               | Sleep attacks                              | 1     | Sudden onset of sleep         | Nervous system disorders                                            |

| Basis data for network                          |                                 |       |                                          |                                                                     |
|-------------------------------------------------|---------------------------------|-------|------------------------------------------|---------------------------------------------------------------------|
| SOC1                                            | AE1                             | score | AE2                                      | SOC2                                                                |
| Infections and infestations                     | Fungal rash                     | 1     | Abdominal abscess                        | Infections and infestations                                         |
| Respiratory, thoracic and mediastinal disorders | Asthma exercise induced         | 1     | Congenital great vessel anomaly          | Congenital, familial and genetic disorders                          |
| Investigations                                  | Glucose tolerance test abnormal | 1     | Bacterial sepsis                         | Infections and infestations                                         |
| Pregnancy, puerperium and perinatal conditions  | Postpartum haemorrhage          | 1     | Microtia                                 | Congenital, familial and genetic disorders                          |
| Musculoskeletal and connective tissue disorders | Hypertonia neonatal             | 1     | Cyanosis neonatal                        | Respiratory, thoracic and mediastinal disorders                     |
| Infections and infestations                     | Streptococcal bacteraemia       | 1     | International normalised ratio decreased | Investigations                                                      |
| Ear and labyrinth disorders                     | Aural polyp                     | 1     | Myringitis                               | Infections and infestations                                         |
| Nervous system disorders                        | Dizziness exertional            | 1     | Coccydynia                               | Musculoskeletal and connective tissue disorders                     |
| Ear and labyrinth disorders                     | Aural polyp                     | 1     | Pharyngeal candidiasis                   | Infections and infestations                                         |
| Infections and infestations                     | Conjunctivitis viral            | 1     | Instillation site irritation             | General disorders and administration site conditions                |
| Injury, poisoning and procedural complications  | Spinal cord injury              | 1     | Streptococcal bacteraemia                | Infections and infestations                                         |
| Nervous system disorders                        | Intention tremor                | 1     | Dizziness exertional                     | Nervous system disorders                                            |
| Eye disorders                                   | Extraocular muscle paresis      | 1     | PCO2 increased                           | Investigations                                                      |
| Musculoskeletal and connective tissue disorders | Fasciitis                       | 1     | Gingival ulceration                      | Gastrointestinal disorders                                          |
| Injury, poisoning and procedural complications  | Chemical eye injury             | 1     | Conjunctivitis viral                     | Infections and infestations                                         |
| Congenital, familial and genetic disorders      | Thymus hypoplasia               | 1     | Hypertelorism of orbit                   | Congenital, familial and genetic disorders                          |
| Investigations                                  | Blood iron increased            | 1     | Lymphoma cutis                           | Neoplasms benign, malignant and unspecified (incl cysts and polyps) |
| Gastrointestinal disorders                      | Gastroduodenal haemorrhage      | 1     | Breast cancer female                     | Neoplasms benign, malignant and unspecified (incl cysts and polyps) |
| Injury, poisoning and procedural complications  | Radius fracture                 | 1     | Listeriosis                              | Infections and infestations                                         |
| Infections and infestations                     | Conjunctivitis viral            | 1     | Instillation site pain                   | General disorders and administration site conditions                |



| Basis data for network                                              |                                     |       |                                           |                                                      |
|---------------------------------------------------------------------|-------------------------------------|-------|-------------------------------------------|------------------------------------------------------|
| SOC1                                                                | AE1                                 | score | AE2                                       | SOC2                                                 |
| Neoplasms benign, malignant and unspecified (incl cysts and polyps) | Duodenal neoplasm                   | 1     | Hydroureter                               | Renal and urinary disorders                          |
| Musculoskeletal and connective tissue disorders                     | Intervertebral disc space narrowing | 1     | Cryptorchism                              | Congenital, familial and genetic disorders           |
| Injury, poisoning and procedural complications                      | Spinal cord injury                  | 1     | Blood creatine phosphokinase BB increased | Investigations                                       |
| Eye disorders                                                       | Vogt-Koyanagi-Harada syndrome       | 1     | Renal tubular atrophy                     | Renal and urinary disorders                          |
| Metabolism and nutrition disorders                                  | Hypoglycaemia unawareness           | 1     | Chronic hepatitis                         | Hepatobiliary disorders                              |
| Investigations                                                      | Serum ferritin increased            | 1     | Transferrin increased                     | Investigations                                       |
| Congenital, familial and genetic disorders                          | Congenital bladder anomaly          | 1     | Microtia                                  | Congenital, familial and genetic disorders           |
| Psychiatric disorders                                               | Hallucination, tactile              | 1     | Coccydynia                                | Musculoskeletal and connective tissue disorders      |
| Respiratory, thoracic and mediastinal disorders                     | Oropharyngeal spasm                 | 1     | Dysaesthesia pharynx                      | Respiratory, thoracic and mediastinal disorders      |
| Gastrointestinal disorders                                          | Abdominal adhesions                 | 1     | Spine malformation                        | Congenital, familial and genetic disorders           |
| Infections and infestations                                         | Fungal oesophagitis                 | 1     | Myringitis                                | Infections and infestations                          |
| Congenital, familial and genetic disorders                          | Congenital great vessel anomaly     | 1     | Hypertelorism of orbit                    | Congenital, familial and genetic disorders           |
| Nervous system disorders                                            | Intention tremor                    | 1     | Hallucination, tactile                    | Psychiatric disorders                                |
| Pregnancy, puerperium and perinatal conditions                      | Delayed delivery                    | 1     | Labour complication                       | Pregnancy, puerperium and perinatal conditions       |
| Congenital, familial and genetic disorders                          | Congenital cerebral cyst            | 1     | Moebius II syndrome                       | Congenital, familial and genetic disorders           |
| Immune system disorders                                             | Allergy to arthropod bite           | 1     | Purpura senile                            | Skin and subcutaneous tissue disorders               |
| Infections and infestations                                         | Pharyngeal candidiasis              | 1     | Fungal oesophagitis                       | Infections and infestations                          |
| Investigations                                                      | White blood cell count              | 1     | Hepatic enzyme                            | Investigations                                       |
| Psychiatric disorders                                               | Hallucination, tactile              | 1     | Abasia                                    | General disorders and administration site conditions |
| Vascular disorders                                                  | Arteriopathic disease               | 1     | Epstein-Barr virus infection              | Infections and infestations                          |

| Basis data for network                                              |                                           |       |                                          |                                                                     |
|---------------------------------------------------------------------|-------------------------------------------|-------|------------------------------------------|---------------------------------------------------------------------|
| SOC1                                                                | AE1                                       | score | AE2                                      | SOC2                                                                |
| Injury, poisoning and procedural complications                      | Cartilage injury                          | 1     | Oral infection                           | Infections and infestations                                         |
| Investigations                                                      | Globulins decreased                       | 1     | Food poisoning                           | Gastrointestinal disorders                                          |
| Nervous system disorders                                            | Dizziness exertional                      | 1     | Hallucination, tactile                   | Psychiatric disorders                                               |
| Investigations                                                      | Blood 25-hydroxycholecalciferol increased | 1     | Rib fracture                             | Injury, poisoning and procedural complications                      |
| Infections and infestations                                         | Carbuncle                                 | 1     | Lip blister                              | Gastrointestinal disorders                                          |
| Investigations                                                      | Alpha-1 anti-trypsin increased            | 1     | Plasminogen increased                    | Investigations                                                      |
| Respiratory, thoracic and mediastinal disorders                     | Asthma exercise induced                   | 1     | Scrotal ulcer                            | Reproductive system and breast disorders                            |
| Investigations                                                      | Total cholesterol/HDL ratio increased     | 1     | Application site discolouration          | General disorders and administration site conditions                |
| Neoplasms benign, malignant and unspecified (incl cysts and polyps) | Pleural neoplasm                          | 1     | Breast cellulitis                        | Infections and infestations                                         |
| Investigations                                                      | Blood creatine phosphokinase BB increased | 1     | International normalised ratio decreased | Investigations                                                      |
| Nervous system disorders                                            | Mastication disorder                      | 1     | Blunted affect                           | Psychiatric disorders                                               |
| Nervous system disorders                                            | Mastication disorder                      | 1     | Suspiciousness                           | Psychiatric disorders                                               |
| Pregnancy, puerperium and perinatal conditions                      | Postpartum haemorrhage                    | 1     | Retained placenta or membranes           | Pregnancy, puerperium and perinatal conditions                      |
| Vascular disorders                                                  | Arterial haemorrhage                      | 1     | Factor V deficiency                      | Congenital, familial and genetic disorders                          |
| Nervous system disorders                                            | Neuralgic amyotrophy                      | 1     | Negative thoughts                        | Psychiatric disorders                                               |
| Investigations                                                      | Alpha-1 anti-trypsin increased            | 1     | Testis cancer                            | Neoplasms benign, malignant and unspecified (incl cysts and polyps) |
| Nervous system disorders                                            | Locked-in syndrome                        | 1     | Brain hypoxia                            | Respiratory, thoracic and mediastinal disorders                     |
| General disorders and administration site conditions                | Abasia                                    | 1     | Mendelson's syndrome                     | Respiratory, thoracic and mediastinal disorders                     |
| Eye disorders                                                       | Eye degenerative disorder                 | 1     | Capillary fragility increased            | Investigations                                                      |
| Neoplasms benign, malignant and unspecified (incl cysts and polyps) | Colorectal cancer                         | 1     | Alpha-1 anti-trypsin increased           | Investigations                                                      |

| Basis data for network                                              |                                    |       |                                           |                                                                     |
|---------------------------------------------------------------------|------------------------------------|-------|-------------------------------------------|---------------------------------------------------------------------|
| SOC1                                                                | AE1                                | score | AE2                                       | SOC2                                                                |
| Neoplasms benign, malignant and unspecified (incl cysts and polyps) | Biliary neoplasm                   | 1     | Bladder papilloma                         | Neoplasms benign, malignant and unspecified (incl cysts and polyps) |
| Congenital, familial and genetic disorders                          | Moebius II syndrome                | 1     | Congenital multiplex arthrogryposis       | Congenital, familial and genetic disorders                          |
| Cardiac disorders                                                   | Cardiomyopathy neonatal            | 1     | Monoparesis                               | Nervous system disorders                                            |
| Congenital, familial and genetic disorders                          | Congenital iris anomaly            | 1     | Muscular dystrophy                        | Congenital, familial and genetic disorders                          |
| Infections and infestations                                         | Acute sinusitis                    | 1     | Diabetic neuropathy                       | Nervous system disorders                                            |
| Renal and urinary disorders                                         | Glomerular vascular disorder       | 1     | Microangiopathy                           | Vascular disorders                                                  |
| Infections and infestations                                         | Meningitis viral                   | 1     | Ruptured ectopic pregnancy                | Pregnancy, puerperium and perinatal conditions                      |
| General disorders and administration site conditions                | Abasia                             | 1     | Intention tremor                          | Nervous system disorders                                            |
| Nervous system disorders                                            | Monoparesis                        | 1     | Microangiopathy                           | Vascular disorders                                                  |
| Neoplasms benign, malignant and unspecified (incl cysts and polyps) | Testis cancer                      | 1     | Vaginal cancer                            | Neoplasms benign, malignant and unspecified (incl cysts and polyps) |
| Eye disorders                                                       | Eye degenerative disorder          | 1     | Diabetic retinopathy                      | Eye disorders                                                       |
| Infections and infestations                                         | Streptococcal bacteraemia          | 1     | Blood creatine phosphokinase MM increased | Investigations                                                      |
| Nervous system disorders                                            | Dizziness exertional               | 1     | Mastication disorder                      | Nervous system disorders                                            |
| Infections and infestations                                         | Epstein-Barr virus infection       | 1     | Urge incontinence                         | Renal and urinary disorders                                         |
| Nervous system disorders                                            | Locked-in syndrome                 | 1     | Urge incontinence                         | Renal and urinary disorders                                         |
| Investigations                                                      | White blood cell count             | 1     | Escherichia bacteraemia                   | Infections and infestations                                         |
| Investigations                                                      | Glycosylated haemoglobin decreased | 1     | Suspiciousness                            | Psychiatric disorders                                               |
| Investigations                                                      | Blood growth hormone abnormal      | 1     | Radius fracture                           | Injury, poisoning and procedural complications                      |
| Infections and infestations                                         | Hepatobiliary infection            | 1     | International normalised ratio decreased  | Investigations                                                      |
| Gastrointestinal disorders                                          | Tooth impacted                     | 1     | Application site warmth                   | General disorders and administration site conditions                |

| Basis data for network                               |                                                           |       |                                           |                                                                     |
|------------------------------------------------------|-----------------------------------------------------------|-------|-------------------------------------------|---------------------------------------------------------------------|
| SOC1                                                 | AE1                                                       | score | AE2                                       | SOC2                                                                |
| Investigations                                       | Electrophoresis abnormal                                  | 1     | Drug level increased                      | Investigations                                                      |
| Musculoskeletal and connective tissue disorders      | Coccydynia                                                | 1     | Abasia                                    | General disorders and administration site conditions                |
| Vascular disorders                                   | Shock haemorrhagic                                        | 1     | Blood creatine phosphokinase BB increased | Investigations                                                      |
| Infections and infestations                          | Injection site pustule                                    | 1     | Subdural haemorrhage                      | Injury, poisoning and procedural complications                      |
| Infections and infestations                          | Hepatobiliary infection                                   | 1     | Spinal cord injury                        | Injury, poisoning and procedural complications                      |
| Gastrointestinal disorders                           | Gastritis alcoholic                                       | 1     | Blood uric acid                           | Investigations                                                      |
| Nervous system disorders                             | Superior sagittal sinus thrombosis                        | 1     | Cerebrospinal fluid rhinorrhoea           | Nervous system disorders                                            |
| Infections and infestations                          | Escherichia bacteraemia                                   | 1     | Metastases to lung                        | Neoplasms benign, malignant and unspecified (incl cysts and polyps) |
| Investigations                                       | Parvovirus B19 serology positive                          | 1     | Liver induration                          | Hepatobiliary disorders                                             |
| Nervous system disorders                             | Chronic inflammatory demyelinating polyradiculoneuropathy | 1     | Diaphragm muscle weakness                 | Respiratory, thoracic and mediastinal disorders                     |
| General disorders and administration site conditions | Application site discolouration                           | 1     | Gardnerella infection                     | Infections and infestations                                         |
| Nervous system disorders                             | Mastication disorder                                      | 1     | Coccydynia                                | Musculoskeletal and connective tissue disorders                     |
| Infections and infestations                          | Fungal rash                                               | 1     | Injection site pustule                    | Infections and infestations                                         |
| Infections and infestations                          | Bullous impetigo                                          | 1     | Glomerular vascular disorder              | Renal and urinary disorders                                         |
| Nervous system disorders                             | Mastication disorder                                      | 1     | Intention tremor                          | Nervous system disorders                                            |
| Gastrointestinal disorders                           | Necrotising enterocolitis neonatal                        | 1     | Cerebral haemorrhage foetal               | Nervous system disorders                                            |
| Infections and infestations                          | Central line infection                                    | 1     | Mycobacterium avium complex infection     | Infections and infestations                                         |
| Investigations                                       | Computerised tomogram abnormal                            | 1     | Fasciitis                                 | Musculoskeletal and connective tissue disorders                     |
| Psychiatric disorders                                | Pseudodementia                                            | 1     | Bleeding time abnormal                    | Investigations                                                      |
| Infections and infestations                          | Abdominal abscess                                         | 1     | Subdural haemorrhage                      | Injury, poisoning and procedural complications                      |

| Basis data for network                                              |                                           |       |                                      |                                                      |
|---------------------------------------------------------------------|-------------------------------------------|-------|--------------------------------------|------------------------------------------------------|
| SOC1                                                                | AE1                                       | score | AE2                                  | SOC2                                                 |
| Neoplasms benign, malignant and unspecified (incl cysts and polyps) | Biliary neoplasm                          | 1     | Biliary dilatation                   | Hepatobiliary disorders                              |
| Vascular disorders                                                  | Visceral arterial ischaemia               | 1     | Prothrombin level abnormal           | Investigations                                       |
| Investigations                                                      | Electrocardiogram poor R-wave progression | 1     | Diaphragm muscle weakness            | Respiratory, thoracic and mediastinal disorders      |
| Blood and lymphatic system disorders                                | Anaemia Heinz body                        | 1     | Hypocomplementaemia                  | Blood and lymphatic system disorders                 |
| Neoplasms benign, malignant and unspecified (incl cysts and polyps) | Lymphoma cutis                            | 1     | Cryptorchism                         | Congenital, familial and genetic disorders           |
| Investigations                                                      | Neutrophil Pelger-Huet anomaly present    | 1     | Synostosis                           | Musculoskeletal and connective tissue disorders      |
| Nervous system disorders                                            | Intracranial venous sinus thrombosis      | 1     | Lennox-Gastaut syndrome              | Nervous system disorders                             |
| Infections and infestations                                         | Gardnerella infection                     | 1     | Application site scar                | General disorders and administration site conditions |
| Nervous system disorders                                            | Parkinsonian rest tremor                  | 1     | Blunted affect                       | Psychiatric disorders                                |
| Metabolism and nutrition disorders                                  | Podagra                                   | 1     | Kussmaul respiration                 | Respiratory, thoracic and mediastinal disorders      |
| Investigations                                                      | Protein urine                             | 1     | Sleep attacks                        | Psychiatric disorders                                |
| Musculoskeletal and connective tissue disorders                     | Intervertebral disc disorder              | 1     | Uterine prolapse                     | Reproductive system and breast disorders             |
| Investigations                                                      | Intraocular pressure test abnormal        | 1     | Scleral disorder                     | Eye disorders                                        |
| Investigations                                                      | Alpha-1 anti-trypsin increased            | 1     | Coagulation factor X level increased | Investigations                                       |
| Infections and infestations                                         | Oral infection                            | 1     | Gastroduodenal haemorrhage           | Gastrointestinal disorders                           |
| Ear and labyrinth disorders                                         | Middle ear effusion                       | 1     | Pelvic peritoneal adhesions          | Reproductive system and breast disorders             |
| Infections and infestations                                         | Epstein-Barr virus infection              | 1     | Brain hypoxia                        | Respiratory, thoracic and mediastinal disorders      |
| General disorders and administration site conditions                | Secretion discharge                       | 1     | Mean cell haemoglobin decreased      | Investigations                                       |
| Nervous system disorders                                            | Meige's syndrome                          | 1     | Antiphospholipid syndrome            | Immune system disorders                              |
| Infections and infestations                                         | Escherichia bacteraemia                   | 1     | Systemic candida                     | Infections and infestations                          |

| Basis data for network                                              |                                     |       |                                        |                                                                     |
|---------------------------------------------------------------------|-------------------------------------|-------|----------------------------------------|---------------------------------------------------------------------|
| SOC1                                                                | AE1                                 | score | AE2                                    | SOC2                                                                |
| Nervous system disorders                                            | Locked-in syndrome                  | 1     | Arteriopathic disease                  | Vascular disorders                                                  |
| Investigations                                                      | Electrocardiogram PQ interval       | 1     | Electrocardiogram QRS complex          | Investigations                                                      |
| Investigations                                                      | Glucose tolerance test abnormal     | 1     | Metastatic neoplasm                    | Neoplasms benign, malignant and unspecified (incl cysts and polyps) |
| Eye disorders                                                       | Retinal deposits                    | 1     | Submandibular mass                     | General disorders and administration site conditions                |
| Neoplasms benign, malignant and unspecified (incl cysts and polyps) | Vaginal cancer                      | 1     | Coagulation factor IX level increased  | Investigations                                                      |
| Respiratory, thoracic and mediastinal disorders                     | Asthma exercise induced             | 1     | Thymus hypoplasia                      | Congenital, familial and genetic disorders                          |
| Renal and urinary disorders                                         | Hydroureter                         | 1     | Aortic dissection                      | Vascular disorders                                                  |
| Immune system disorders                                             | Allergy to arthropod bite           | 1     | Cartilage injury                       | Injury, poisoning and procedural complications                      |
| Respiratory, thoracic and mediastinal disorders                     | Pneumomediastinum                   | 1     | Necrotising enterocolitis neonatal     | Gastrointestinal disorders                                          |
| Investigations                                                      | Protein C increased                 | 1     | Uterine pain                           | Reproductive system and breast disorders                            |
| Musculoskeletal and connective tissue disorders                     | Lumbar spinal stenosis              | 1     | Urine ketone body present              | Investigations                                                      |
| Respiratory, thoracic and mediastinal disorders                     | Pleural rub                         | 1     | Radius fracture                        | Injury, poisoning and procedural complications                      |
| Metabolism and nutrition disorders                                  | Fat intolerance                     | 1     | Infection in an immunocompromised host | Infections and infestations                                         |
| Metabolism and nutrition disorders                                  | Diabetes mellitus insulin-dependent | 1     | Microangiopathy                        | Vascular disorders                                                  |
| Psychiatric disorders                                               | Sleep attacks                       | 1     | Sleep paralysis                        | Nervous system disorders                                            |
| Infections and infestations                                         | Sweat gland infection               | 1     | Low turnover osteopathy                | Musculoskeletal and connective tissue disorders                     |
| Gastrointestinal disorders                                          | Pancreatic disorder                 | 1     | Cardiac failure chronic                | Cardiac disorders                                                   |
| Investigations                                                      | Ceruloplasmin increased             | 1     | Coagulation factor VII level increased | Investigations                                                      |
| Investigations                                                      | Blood testosterone free increased   | 1     | Urinary tract pain                     | Renal and urinary disorders                                         |
| Reproductive system and breast disorders                            | Scrotal ulcer                       | 1     | Tendon calcification                   | Musculoskeletal and connective tissue disorders                     |

| Basis data for network                                              |                                       |       |                                   |                                                                     |
|---------------------------------------------------------------------|---------------------------------------|-------|-----------------------------------|---------------------------------------------------------------------|
| SOC1                                                                | AE1                                   | score | AE2                               | SOC2                                                                |
| Nervous system disorders                                            | Locked-in syndrome                    | 1     | Bullous impetigo                  | Infections and infestations                                         |
| Congenital, familial and genetic disorders                          | Congenital optic nerve anomaly        | 1     | Plasmodium falciparum infection   | Infections and infestations                                         |
| Nervous system disorders                                            | Developmental coordination disorder   | 1     | Haemorrhagic urticaria            | Skin and subcutaneous tissue disorders                              |
| Infections and infestations                                         | Pseudomonal sepsis                    | 1     | Enterococcal bacteraemia          | Infections and infestations                                         |
| Endocrine disorders                                                 | Thyrotoxic periodic paralysis         | 1     | Lactate pyruvate ratio increased  | Investigations                                                      |
| Ear and labyrinth disorders                                         | Middle ear effusion                   | 1     | Migraine with aura                | Nervous system disorders                                            |
| Metabolism and nutrition disorders                                  | Diabetes mellitus insulin-dependent   | 1     | Cardiomyopathy neonatal           | Cardiac disorders                                                   |
| Nervous system disorders                                            | Atonic seizures                       | 1     | Blood testosterone free increased | Investigations                                                      |
| General disorders and administration site conditions                | Application site discolouration       | 1     | Trichomoniasis                    | Infections and infestations                                         |
| Gastrointestinal disorders                                          | Leukoplakia oral                      | 1     | Electrocardiogram PR interval     | Investigations                                                      |
| Ear and labyrinth disorders                                         | Middle ear effusion                   | 1     | Laryngeal neoplasm                | Neoplasms benign, malignant and unspecified (incl cysts and polyps) |
| Eye disorders                                                       | Optic disc disorder                   | 1     | Visual field tests abnormal       | Investigations                                                      |
| Renal and urinary disorders                                         | Urinary tract pain                    | 1     | Periarticular disorder            | Musculoskeletal and connective tissue disorders                     |
| Neoplasms benign, malignant and unspecified (incl cysts and polyps) | Metastases to lung                    | 1     | Metastatic neoplasm               | Neoplasms benign, malignant and unspecified (incl cysts and polyps) |
| General disorders and administration site conditions                | Implant expulsion                     | 1     | Injection site paraesthesia       | General disorders and administration site conditions                |
| Respiratory, thoracic and mediastinal disorders                     | Brain hypoxia                         | 1     | Monoparesis                       | Nervous system disorders                                            |
| Infections and infestations                                         | Enterococcal bacteraemia              | 1     | Bacterial sepsis                  | Infections and infestations                                         |
| Psychiatric disorders                                               | Flat affect                           | 1     | Parkinsonian rest tremor          | Nervous system disorders                                            |
| Investigations                                                      | Pulmonary arterial pressure decreased | 1     | Postoperative fever               | Injury, poisoning and procedural complications                      |
| Congenital, familial and genetic disorders                          | Thymus hypoplasia                     | 1     | Congenital great vessel anomaly   | Congenital, familial and genetic disorders                          |

| Basis data for network                                              |                                      |       |                                               |                                                      |
|---------------------------------------------------------------------|--------------------------------------|-------|-----------------------------------------------|------------------------------------------------------|
| SOC1                                                                | AE1                                  | score | AE2                                           | SOC2                                                 |
| Congenital, familial and genetic disorders                          | Homocystinaemia                      | 1     | Eosinophilic colitis                          | Gastrointestinal disorders                           |
| Hepatobiliary disorders                                             | Hepatic vein occlusion               | 1     | Dysaesthesia pharynx                          | Respiratory, thoracic and mediastinal disorders      |
| General disorders and administration site conditions                | Application site scar                | 1     | Total cholesterol/HDL ratio increased         | Investigations                                       |
| Immune system disorders                                             | Food allergy                         | 1     | Bleeding anovulatory                          | Reproductive system and breast disorders             |
| Nervous system disorders                                            | Intracranial venous sinus thrombosis | 1     | Neuralgic amyotrophy                          | Nervous system disorders                             |
| Reproductive system and breast disorders                            | Ovarian fibrosis                     | 1     | Blepharophimosis congenital                   | Congenital, familial and genetic disorders           |
| Renal and urinary disorders                                         | Urge incontinence                    | 1     | Gastroesophagitis                             | Gastrointestinal disorders                           |
| Injury, poisoning and procedural complications                      | Subdural haemorrhage                 | 1     | Pelvic abscess                                | Infections and infestations                          |
| Investigations                                                      | Glucose tolerance test abnormal      | 1     | White blood cell count                        | Investigations                                       |
| Neoplasms benign, malignant and unspecified (incl cysts and polyps) | Biliary neoplasm                     | 1     | Microlithiasis                                | General disorders and administration site conditions |
| Reproductive system and breast disorders                            | Testis discomfort                    | 1     | Blood growth hormone abnormal                 | Investigations                                       |
| Infections and infestations                                         | Candida sepsis                       | 1     | Bacterial sepsis                              | Infections and infestations                          |
| Nervous system disorders                                            | Locked-in syndrome                   | 1     | Diabetes mellitus insulin-dependent           | Metabolism and nutrition disorders                   |
| Investigations                                                      | Albumin globulin ratio abnormal      | 1     | Eosinophilic pustular folliculitis            | Skin and subcutaneous tissue disorders               |
| Investigations                                                      | Osteocalcin decreased                | 1     | Blood 1,25-dihydroxycholecalciferol increased | Investigations                                       |
| Injury, poisoning and procedural complications                      | Scratch                              | 1     | Periorbital haematoma                         | Injury, poisoning and procedural complications       |
| Infections and infestations                                         | Sweat gland infection                | 1     | Aortic valve stenosis                         | Cardiac disorders                                    |
| Gastrointestinal disorders                                          | Gastroesophagitis                    | 1     | Brain hypoxia                                 | Respiratory, thoracic and mediastinal disorders      |
| Endocrine disorders                                                 | Parathyroid gland enlargement        | 1     | Aortic valve stenosis                         | Cardiac disorders                                    |
| Infections and infestations                                         | Periodontal destruction              | 1     | Retinal deposits                              | Eye disorders                                        |



| Basis data for network                                              |                           |       |                               |                                                                     |
|---------------------------------------------------------------------|---------------------------|-------|-------------------------------|---------------------------------------------------------------------|
| SOC1                                                                | AE1                       | score | AE2                           | SOC2                                                                |
| Musculoskeletal and connective tissue disorders                     | Muscle necrosis           | 1     | Biopsy foetal abnormal        | Investigations                                                      |
| Nervous system disorders                                            | Parkinsonian rest tremor  | 1     | Periorbital haematoma         | Injury, poisoning and procedural complications                      |
| Reproductive system and breast disorders                            | Menstrual discomfort      | 1     | Malignant ovarian cyst        | Reproductive system and breast disorders                            |
| Reproductive system and breast disorders                            | Scrotal ulcer             | 1     | Acne fulminans                | Skin and subcutaneous tissue disorders                              |
| Neoplasms benign, malignant and unspecified (incl cysts and polyps) | Metastatic neoplasm       | 1     | Systemic candida              | Infections and infestations                                         |
| Infections and infestations                                         | Parametritis              | 1     | Meningitis viral              | Infections and infestations                                         |
| General disorders and administration site conditions                | Hypertrophy               | 1     | Lid margin discharge          | Eye disorders                                                       |
| Gastrointestinal disorders                                          | Proctitis ulcerative      | 1     | Febrile convulsion            | Nervous system disorders                                            |
| Injury, poisoning and procedural complications                      | Periorbital haematoma     | 1     | Self mutilation               | Injury, poisoning and procedural complications                      |
| Psychiatric disorders                                               | Blunted affect            | 1     | Hallucination, tactile        | Psychiatric disorders                                               |
| Eye disorders                                                       | Madarosis                 | 1     | Haptoglobin increased         | Investigations                                                      |
| Neoplasms benign, malignant and unspecified (incl cysts and polyps) | Pituitary tumour          | 1     | Dermoid cyst of ovary         | Congenital, familial and genetic disorders                          |
| Investigations                                                      | Troponin increased        | 1     | Platelet aggregation abnormal | Investigations                                                      |
| Neoplasms benign, malignant and unspecified (incl cysts and polyps) | Anaplastic thyroid cancer | 1     | Abdominal adhesions           | Gastrointestinal disorders                                          |
| Investigations                                                      | Histone antibody positive | 1     | Atonic seizures               | Nervous system disorders                                            |
| Respiratory, thoracic and mediastinal disorders                     | Mendelson's syndrome      | 1     | Flat affect                   | Psychiatric disorders                                               |
| Vascular disorders                                                  | Arteriopathic disease     | 1     | Monoparesis                   | Nervous system disorders                                            |
| Infections and infestations                                         | Bullous impetigo          | 1     | Microangiopathy               | Vascular disorders                                                  |
| Metabolism and nutrition disorders                                  | Oligodipsia               | 1     | Periarticular disorder        | Musculoskeletal and connective tissue disorders                     |
| Vascular disorders                                                  | Shock haemorrhagic        | 1     | T-cell lymphoma               | Neoplasms benign, malignant and unspecified (incl cysts and polyps) |

| Basis data for network                                              |                                     |       |                                 |                                                      |
|---------------------------------------------------------------------|-------------------------------------|-------|---------------------------------|------------------------------------------------------|
| SOC1                                                                | AE1                                 | score | AE2                             | SOC2                                                 |
| Neoplasms benign, malignant and unspecified (incl cysts and polyps) | Bronchioloalveolar carcinoma        | 1     | Vital capacity decreased        | Investigations                                       |
| Metabolism and nutrition disorders                                  | Diabetes mellitus insulin-dependent | 1     | Bullous impetigo                | Infections and infestations                          |
| Neoplasms benign, malignant and unspecified (incl cysts and polyps) | Breast cancer female                | 1     | Cartilage injury                | Injury, poisoning and procedural complications       |
| Respiratory, thoracic and mediastinal disorders                     | Hypopnoea                           | 1     | Sleep paralysis                 | Nervous system disorders                             |
| General disorders and administration site conditions                | Submandibular mass                  | 1     | Globulins decreased             | Investigations                                       |
| Psychiatric disorders                                               | Suspiciousness                      | 1     | Abasia                          | General disorders and administration site conditions |
| Investigations                                                      | Blood testosterone free increased   | 1     | Oligodipsia                     | Metabolism and nutrition disorders                   |
| Gastrointestinal disorders                                          | Gastroduodenal haemorrhage          | 1     | Allergy to arthropod bite       | Immune system disorders                              |
| Psychiatric disorders                                               | Suspiciousness                      | 1     | Coccydynia                      | Musculoskeletal and connective tissue disorders      |
| Investigations                                                      | Renin increased                     | 1     | Barter's syndrome               | Congenital, familial and genetic disorders           |
| Infections and infestations                                         | Amoebiasis                          | 1     | Anorexia nervosa                | Psychiatric disorders                                |
| Nervous system disorders                                            | Intention tremor                    | 1     | Suspiciousness                  | Psychiatric disorders                                |
| Investigations                                                      | Blood uric acid                     | 1     | Vitamin D decreased             | Investigations                                       |
| Neoplasms benign, malignant and unspecified (incl cysts and polyps) | Gammopathy                          | 1     | Rib fracture                    | Injury, poisoning and procedural complications       |
| Renal and urinary disorders                                         | Cystitis noninfective               | 1     | Intussusception                 | Gastrointestinal disorders                           |
| Cardiac disorders                                                   | Cardiomyopathy neonatal             | 1     | Bullous impetigo                | Infections and infestations                          |
| Infections and infestations                                         | Pelvic abscess                      | 1     | Neutrophil percentage increased | Investigations                                       |
| Investigations                                                      | Urine iron increased                | 1     | Blood zinc abnormal             | Investigations                                       |
| Congenital, familial and genetic disorders                          | Congenital pneumonia                | 1     | Cephalin flocculation           | Investigations                                       |
| Respiratory, thoracic and mediastinal disorders                     | Nasal mucosa atrophy                | 1     | Chorioretinopathy               | Eye disorders                                        |

| Basis data for network                                              |                                           |       |                                               |                                                                     |
|---------------------------------------------------------------------|-------------------------------------------|-------|-----------------------------------------------|---------------------------------------------------------------------|
| SOC1                                                                | AE1                                       | score | AE2                                           | SOC2                                                                |
| Nervous system disorders                                            | Dizziness exertional                      | 1     | Suspiciousness                                | Psychiatric disorders                                               |
| Investigations                                                      | Blood iron increased                      | 1     | Intervertebral disc space narrowing           | Musculoskeletal and connective tissue disorders                     |
| Nervous system disorders                                            | Cerebellar atrophy                        | 1     | Aortic valve stenosis                         | Cardiac disorders                                                   |
| Investigations                                                      | Blood creatine phosphokinase BB increased | 1     | Blood creatine phosphokinase MM increased     | Investigations                                                      |
| Investigations                                                      | Glucose tolerance test abnormal           | 1     | Pseudomonal sepsis                            | Infections and infestations                                         |
| Immune system disorders                                             | Behcet's syndrome                         | 1     | Parvovirus B19 serology positive              | Investigations                                                      |
| Investigations                                                      | Alpha-1 anti-trypsin increased            | 1     | Coagulation factor IX level increased         | Investigations                                                      |
| Gastrointestinal disorders                                          | Gingival ulceration                       | 1     | Computerised tomogram abnormal                | Investigations                                                      |
| Investigations                                                      | Hepatic enzyme                            | 1     | Metastases to lung                            | Neoplasms benign, malignant and unspecified (incl cysts and polyps) |
| Neoplasms benign, malignant and unspecified (incl cysts and polyps) | Prolactinoma                              | 1     | Neurofibromatosis                             | Congenital, familial and genetic disorders                          |
| Investigations                                                      | Neutrophil Pelger-Huet anomaly present    | 1     | Antidiuretic hormone abnormality              | Endocrine disorders                                                 |
| Psychiatric disorders                                               | Blunted affect                            | 1     | Dizziness exertional                          | Nervous system disorders                                            |
| Nervous system disorders                                            | Cerebellar atrophy                        | 1     | Parathyroid tumour benign                     | Neoplasms benign, malignant and unspecified (incl cysts and polyps) |
| Investigations                                                      | Creatinine urine decreased                | 1     | Eczema infected                               | Infections and infestations                                         |
| Blood and lymphatic system disorders                                | Hypocomplementaemia                       | 1     | Pityriasis lichenoides et varioliformis acuta | Skin and subcutaneous tissue disorders                              |
| Psychiatric disorders                                               | Blunted affect                            | 1     | Coccydynia                                    | Musculoskeletal and connective tissue disorders                     |
| Investigations                                                      | Glycosylated haemoglobin decreased        | 1     | Flat affect                                   | Psychiatric disorders                                               |
| Psychiatric disorders                                               | Blunted affect                            | 1     | Intention tremor                              | Nervous system disorders                                            |
| Nervous system disorders                                            | Monoparesis                               | 1     | Epstein-Barr virus infection                  | Infections and infestations                                         |
| Hepatobiliary disorders                                             | Chronic hepatitis                         | 1     | Pneumonia primary atypical                    | Infections and infestations                                         |

| Basis data for network                          |                                     |       |                               |                                                                     |
|-------------------------------------------------|-------------------------------------|-------|-------------------------------|---------------------------------------------------------------------|
| SOC1                                            | AE1                                 | score | AE2                           | SOC2                                                                |
| Psychiatric disorders                           | Suspiciousness                      | 1     | Hallucination, tactile        | Psychiatric disorders                                               |
| Musculoskeletal and connective tissue disorders | Low turnover osteopathy             | 1     | Parathyroid gland enlargement | Endocrine disorders                                                 |
| Gastrointestinal disorders                      | Lower gastrointestinal haemorrhage  | 1     | Purpura senile                | Skin and subcutaneous tissue disorders                              |
| Metabolism and nutrition disorders              | Oligodipsia                         | 1     | Histone antibody positive     | Investigations                                                      |
| Injury, poisoning and procedural complications  | Radius fracture                     | 1     | Rectal polyp                  | Gastrointestinal disorders                                          |
| Nervous system disorders                        | Atonic seizures                     | 1     | Periarticular disorder        | Musculoskeletal and connective tissue disorders                     |
| Skin and subcutaneous tissue disorders          | Urticaria localised                 | 1     | Urethral obstruction          | Renal and urinary disorders                                         |
| Investigations                                  | White blood cell count              | 1     | Metastatic neoplasm           | Neoplasms benign, malignant and unspecified (incl cysts and polyps) |
| Congenital, familial and genetic disorders      | Dermoid cyst of ovary               | 1     | Congenital joint malformation | Congenital, familial and genetic disorders                          |
| Psychiatric disorders                           | Pseudodementia                      | 1     | Carnitine deficiency          | Metabolism and nutrition disorders                                  |
| Reproductive system and breast disorders        | Scrotal ulcer                       | 1     | Hypertelorism of orbit        | Congenital, familial and genetic disorders                          |
| Reproductive system and breast disorders        | Testis discomfort                   | 1     | Implant expulsion             | General disorders and administration site conditions                |
| Reproductive system and breast disorders        | Painful erection                    | 1     | Electroencephalogram          | Investigations                                                      |
| Reproductive system and breast disorders        | Pelvic peritoneal adhesions         | 1     | Abdominal adhesions           | Gastrointestinal disorders                                          |
| Nervous system disorders                        | Ballismus                           | 1     | Uterine prolapse              | Reproductive system and breast disorders                            |
| Investigations                                  | Hepatic enzyme                      | 1     | Systemic candida              | Infections and infestations                                         |
| Investigations                                  | Troponin I increased                | 1     | Embolism venous               | Vascular disorders                                                  |
| Congenital, familial and genetic disorders      | Congenital multiplex arthrogryposis | 1     | Congenital cerebral cyst      | Congenital, familial and genetic disorders                          |
| Gastrointestinal disorders                      | Tooth deposit                       | 1     | Salivary gland calculus       | Gastrointestinal disorders                                          |
| Renal and urinary disorders                     | Glomerular vascular disorder        | 1     | Locked-in syndrome            | Nervous system disorders                                            |

| Basis data for network                                              |                                               |       |                                       |                                                 |
|---------------------------------------------------------------------|-----------------------------------------------|-------|---------------------------------------|-------------------------------------------------|
| SOC1                                                                | AE1                                           | score | AE2                                   | SOC2                                            |
| Investigations                                                      | Blood 1,25-dihydroxycholecalciferol decreased | 1     | Saliva discolouration                 | Gastrointestinal disorders                      |
| Congenital, familial and genetic disorders                          | Inborn error of metabolism                    | 1     | Rectal perforation                    | Gastrointestinal disorders                      |
| General disorders and administration site conditions                | Implant expulsion                             | 1     | Listeriosis                           | Infections and infestations                     |
| Renal and urinary disorders                                         | Urge incontinence                             | 1     | Monoparesis                           | Nervous system disorders                        |
| Neoplasms benign, malignant and unspecified (incl cysts and polyps) | Vaginal cancer                                | 1     | Alpha-1 anti-trypsin increased        | Investigations                                  |
| Congenital, familial and genetic disorders                          | Congenital bladder anomaly                    | 1     | Retained placenta or membranes        | Pregnancy, puerperium and perinatal conditions  |
| Neoplasms benign, malignant and unspecified (incl cysts and polyps) | Bladder papilloma                             | 1     | Renal abscess                         | Infections and infestations                     |
| Renal and urinary disorders                                         | Ureteric obstruction                          | 1     | Ovarian atrophy                       | Reproductive system and breast disorders        |
| Neoplasms benign, malignant and unspecified (incl cysts and polyps) | Pituitary tumour                              | 1     | Neurofibromatosis                     | Congenital, familial and genetic disorders      |
| Psychiatric disorders                                               | Abulia                                        | 1     | Hyperhomocysteinaemia                 | Metabolism and nutrition disorders              |
| Congenital, familial and genetic disorders                          | Glucose-6-phosphate dehydrogenase deficiency  | 1     | Vitamin B complex deficiency          | Metabolism and nutrition disorders              |
| Infections and infestations                                         | Trichomoniasis                                | 1     | Total cholesterol/HDL ratio increased | Investigations                                  |
| Endocrine disorders                                                 | Thyrotoxic periodic paralysis                 | 1     | Gerstmann's syndrome                  | Nervous system disorders                        |
| Congenital, familial and genetic disorders                          | Optic nerve hypoplasia                        | 1     | Asthma exercise induced               | Respiratory, thoracic and mediastinal disorders |
| Neoplasms benign, malignant and unspecified (incl cysts and polyps) | Duodenal neoplasm                             | 1     | Aortic dissection                     | Vascular disorders                              |
| Nervous system disorders                                            | Drug withdrawal convulsions                   | 1     | Intracranial venous sinus thrombosis  | Nervous system disorders                        |
| Investigations                                                      | Coagulation factor VII level increased        | 1     | Coagulation factor IX level increased | Investigations                                  |
| Cardiac disorders                                                   | Cardiomyopathy neonatal                       | 1     | Arteriopathic disease                 | Vascular disorders                              |
| Investigations                                                      | Neutrophil percentage increased               | 1     | Injection site pustule                | Infections and infestations                     |
| Renal and urinary disorders                                         | Glomerular vascular disorder                  | 1     | Urge incontinence                     | Renal and urinary disorders                     |

| Basis data for network                                              |                                      |       |                                           |                                                                     |
|---------------------------------------------------------------------|--------------------------------------|-------|-------------------------------------------|---------------------------------------------------------------------|
| SOC1                                                                | AE1                                  | score | AE2                                       | SOC2                                                                |
| Vascular disorders                                                  | Arteriopathic disease                | 1     | Microangiopathy                           | Vascular disorders                                                  |
| Musculoskeletal and connective tissue disorders                     | Joint destruction                    | 1     | Rectal perforation                        | Gastrointestinal disorders                                          |
| Pregnancy, puerperium and perinatal conditions                      | Antepartum haemorrhage               | 1     | Delayed delivery                          | Pregnancy, puerperium and perinatal conditions                      |
| Investigations                                                      | Urea urine increased                 | 1     | Diabetic neuropathy                       | Nervous system disorders                                            |
| Congenital, familial and genetic disorders                          | Hypertelorism of orbit               | 1     | Optic nerve hypoplasia                    | Congenital, familial and genetic disorders                          |
| Investigations                                                      | Neutrophil percentage increased      | 1     | Subdural haemorrhage                      | Injury, poisoning and procedural complications                      |
| Neoplasms benign, malignant and unspecified (incl cysts and polyps) | Abdominal neoplasm                   | 1     | Hepatic cyst                              | Hepatobiliary disorders                                             |
| Neoplasms benign, malignant and unspecified (incl cysts and polyps) | Gastrointestinal stromal tumour      | 1     | Blood acid phosphatase increased          | Investigations                                                      |
| Cardiac disorders                                                   | Cardiomyopathy neonatal              | 1     | Microangiopathy                           | Vascular disorders                                                  |
| Investigations                                                      | Coagulation factor X level increased | 1     | Breast cyst                               | Reproductive system and breast disorders                            |
| Congenital, familial and genetic disorders                          | Moebius II syndrome                  | 1     | Microtia                                  | Congenital, familial and genetic disorders                          |
| Neoplasms benign, malignant and unspecified (incl cysts and polyps) | Gastrointestinal stromal tumour      | 1     | Middle ear effusion                       | Ear and labyrinth disorders                                         |
| Infections and infestations                                         | Gardnerella infection                | 1     | Total cholesterol/HDL ratio increased     | Investigations                                                      |
| Investigations                                                      | Coagulation factor X level increased | 1     | Colorectal cancer                         | Neoplasms benign, malignant and unspecified (incl cysts and polyps) |
| Investigations                                                      | Neutrophil percentage increased      | 1     | Fungal rash                               | Infections and infestations                                         |
| Musculoskeletal and connective tissue disorders                     | Osteitis deformans                   | 1     | Pierre Robin syndrome                     | Congenital, familial and genetic disorders                          |
| Neoplasms benign, malignant and unspecified (incl cysts and polyps) | Metastatic neoplasm                  | 1     | Escherichia bacteraemia                   | Infections and infestations                                         |
| Infections and infestations                                         | Streptococcal bacteraemia            | 1     | Blood creatine phosphokinase BB increased | Investigations                                                      |
| Respiratory, thoracic and mediastinal disorders                     | Brain hypoxia                        | 1     | Microangiopathy                           | Vascular disorders                                                  |
| Renal and urinary disorders                                         | Acute prerenal failure               | 1     | Hepatic vein thrombosis                   | Hepatobiliary disorders                                             |

| Basis data for network                                              |                                       |       |                                        |                                                                     |
|---------------------------------------------------------------------|---------------------------------------|-------|----------------------------------------|---------------------------------------------------------------------|
| SOC1                                                                | AE1                                   | score | AE2                                    | SOC2                                                                |
| Psychiatric disorders                                               | Stereotypy                            | 1     | Automatism                             | Psychiatric disorders                                               |
| Investigations                                                      | Glycosylated haemoglobin decreased    | 1     | Abasia                                 | General disorders and administration site conditions                |
| Neoplasms benign, malignant and unspecified (incl cysts and polyps) | Testis cancer                         | 1     | Coagulation factor VII level increased | Investigations                                                      |
| Injury, poisoning and procedural complications                      | Periorbital haematoma                 | 1     | Mastication disorder                   | Nervous system disorders                                            |
| Reproductive system and breast disorders                            | Nipple exudate bloody                 | 1     | Injection site discolouration          | General disorders and administration site conditions                |
| Reproductive system and breast disorders                            | Nipple exudate bloody                 | 1     | Vaginal cyst                           | Reproductive system and breast disorders                            |
| Investigations                                                      | Plasminogen increased                 | 1     | Testis cancer                          | Neoplasms benign, malignant and unspecified (incl cysts and polyps) |
| Congenital, familial and genetic disorders                          | Cerebral atrophy congenital           | 1     | Stress fracture                        | Injury, poisoning and procedural complications                      |
| Congenital, familial and genetic disorders                          | Exomphalos                            | 1     | Abortion complete                      | Pregnancy, puerperium and perinatal conditions                      |
| Investigations                                                      | Pulse absent                          | 1     | Intranasal paraesthesia                | Respiratory, thoracic and mediastinal disorders                     |
| Investigations                                                      | Pulmonary arterial pressure decreased | 1     | Fluorosis                              | Injury, poisoning and procedural complications                      |
| Neoplasms benign, malignant and unspecified (incl cysts and polyps) | Neurofibroma                          | 1     | Acanthoma                              | Neoplasms benign, malignant and unspecified (incl cysts and polyps) |
| Neoplasms benign, malignant and unspecified (incl cysts and polyps) | Testis cancer                         | 1     | Breast cyst                            | Reproductive system and breast disorders                            |
| Congenital, familial and genetic disorders                          | Congenital optic nerve anomaly        | 1     | Electrocardiogram normal               | Investigations                                                      |
| Investigations                                                      | Coagulation factor IX level increased | 1     | Adenosquamous carcinoma of the cervix  | Neoplasms benign, malignant and unspecified (incl cysts and polyps) |
| Vascular disorders                                                  | Arteriopathic disease                 | 1     | Glomerular vascular disorder           | Renal and urinary disorders                                         |
| General disorders and administration site conditions                | Implant expulsion                     | 1     | Radius fracture                        | Injury, poisoning and procedural complications                      |
| Musculoskeletal and connective tissue disorders                     | Fasciitis                             | 1     | Febrile convulsion                     | Nervous system disorders                                            |
| Neoplasms benign, malignant and unspecified (incl cysts and polyps) | Brain neoplasm malignant              | 1     | Nasopharyngeal cancer                  | Neoplasms benign, malignant and unspecified (incl cysts and polyps) |
| Ear and labyrinth disorders                                         | Ear haemorrhage                       | 1     | Instillation site irritation           | General disorders and administration site conditions                |

| Basis data for network                                              |                                        |       |                                           |                                                                     |
|---------------------------------------------------------------------|----------------------------------------|-------|-------------------------------------------|---------------------------------------------------------------------|
| SOC1                                                                | AE1                                    | score | AE2                                       | SOC2                                                                |
| Congenital, familial and genetic disorders                          | Moebius II syndrome                    | 1     | Retained placenta or membranes            | Pregnancy, puerperium and perinatal conditions                      |
| Musculoskeletal and connective tissue disorders                     | Neck mass                              | 1     | Oestrogen deficiency                      | Endocrine disorders                                                 |
| Infections and infestations                                         | Abscess soft tissue                    | 1     | Hepatic siderosis                         | Hepatobiliary disorders                                             |
| Vascular disorders                                                  | Aneurysm ruptured                      | 1     | Aortic dissection                         | Vascular disorders                                                  |
| Musculoskeletal and connective tissue disorders                     | Intervertebral disc disorder           | 1     | Ballismus                                 | Nervous system disorders                                            |
| Psychiatric disorders                                               | Blunted affect                         | 1     | Periorbital haematoma                     | Injury, poisoning and procedural complications                      |
| Renal and urinary disorders                                         | Glomerular vascular disorder           | 1     | Brain hypoxia                             | Respiratory, thoracic and mediastinal disorders                     |
| Neoplasms benign, malignant and unspecified (incl cysts and polyps) | Testis cancer                          | 1     | Adenosquamous carcinoma of the cervix     | Neoplasms benign, malignant and unspecified (incl cysts and polyps) |
| Investigations                                                      | Haptoglobin increased                  | 1     | Cryptorchism                              | Congenital, familial and genetic disorders                          |
| Investigations                                                      | Audiogram abnormal                     | 1     | Echolalia                                 | Psychiatric disorders                                               |
| Infections and infestations                                         | Abdominal abscess                      | 1     | Neutrophil percentage increased           | Investigations                                                      |
| Neoplasms benign, malignant and unspecified (incl cysts and polyps) | T-cell lymphoma                        | 1     | Blood creatine phosphokinase BB increased | Investigations                                                      |
| Nervous system disorders                                            | Acalculia                              | 1     | Thyrotoxic periodic paralysis             | Endocrine disorders                                                 |
| Investigations                                                      | Coagulation factor VII level increased | 1     | Vaginal cancer                            | Neoplasms benign, malignant and unspecified (incl cysts and polyps) |
| Infections and infestations                                         | Escherichia bacteraemia                | 1     | Glucose tolerance test abnormal           | Investigations                                                      |
| Psychiatric disorders                                               | Communication disorder                 | 1     | Perseveration                             | Psychiatric disorders                                               |
| Neoplasms benign, malignant and unspecified (incl cysts and polyps) | Papilloma                              | 1     | Diarrhoea infectious                      | Infections and infestations                                         |
| Cardiac disorders                                                   | Coronary artery dissection             | 1     | Necrotising enterocolitis neonatal        | Gastrointestinal disorders                                          |
| Infections and infestations                                         | Bacterial sepsis                       | 1     | Escherichia bacteraemia                   | Infections and infestations                                         |
| Reproductive system and breast disorders                            | Breast cyst                            | 1     | Coagulation factor VII level increased    | Investigations                                                      |



| Basis data for network                               |                                           |       |                                         |                                                                     |
|------------------------------------------------------|-------------------------------------------|-------|-----------------------------------------|---------------------------------------------------------------------|
| SOC1                                                 | AE1                                       | score | AE2                                     | SOC2                                                                |
| Infections and infestations                          | Hepatobiliary infection                   | 1     | T-cell lymphoma                         | Neoplasms benign, malignant and unspecified (incl cysts and polyps) |
| Investigations                                       | Plasminogen increased                     | 1     | Breast cyst                             | Reproductive system and breast disorders                            |
| Ear and labyrinth disorders                          | Middle ear effusion                       | 1     | Blood acid phosphatase increased        | Investigations                                                      |
| Investigations                                       | Coagulation factor VII level increased    | 1     | Colorectal cancer                       | Neoplasms benign, malignant and unspecified (incl cysts and polyps) |
| Vascular disorders                                   | Arteriopathic disease                     | 1     | Urge incontinence                       | Renal and urinary disorders                                         |
| Investigations                                       | Electrocardiogram PQ interval             | 1     | Electrocardiogram QRS complex shortened | Investigations                                                      |
| Eye disorders                                        | Conjunctival vascular disorder            | 1     | Hysterical psychosis                    | Psychiatric disorders                                               |
| Psychiatric disorders                                | Communication disorder                    | 1     | Aerophagia                              | Gastrointestinal disorders                                          |
| Investigations                                       | Plasminogen increased                     | 1     | Colorectal cancer                       | Neoplasms benign, malignant and unspecified (incl cysts and polyps) |
| Investigations                                       | Urine ketone body present                 | 1     | Electrocardiogram Q wave abnormal       | Investigations                                                      |
| Infections and infestations                          | Escherichia bacteraemia                   | 1     | Pseudomonal sepsis                      | Infections and infestations                                         |
| Infections and infestations                          | Conjunctivitis viral                      | 1     | Ear haemorrhage                         | Ear and labyrinth disorders                                         |
| Vascular disorders                                   | Arteriopathic disease                     | 1     | Brain hypoxia                           | Respiratory, thoracic and mediastinal disorders                     |
| Investigations                                       | Coagulation factor X level increased      | 1     | Coagulation factor VII level increased  | Investigations                                                      |
| Congenital, familial and genetic disorders           | Pierre Robin syndrome                     | 1     | Oral fungal infection                   | Infections and infestations                                         |
| Investigations                                       | Coagulation factor VII level increased    | 1     | Plasminogen increased                   | Investigations                                                      |
| General disorders and administration site conditions | Injection site discolouration             | 1     | Vaginal cyst                            | Reproductive system and breast disorders                            |
| Skin and subcutaneous tissue disorders               | Transient acantholytic dermatosis         | 1     | Hepatic siderosis                       | Hepatobiliary disorders                                             |
| Investigations                                       | Blood 25-hydroxycholecalciferol increased | 1     | Gammopathy                              | Neoplasms benign, malignant and unspecified (incl cysts and polyps) |
| Congenital, familial and genetic disorders           | Neurofibromatosis                         | 1     | Glioblastoma multiforme                 | Neoplasms benign, malignant and unspecified (incl cysts and polyps) |

| Basis data for network                                              |                                       |       |                                        |                                                                     |
|---------------------------------------------------------------------|---------------------------------------|-------|----------------------------------------|---------------------------------------------------------------------|
| SOC1                                                                | AE1                                   | score | AE2                                    | SOC2                                                                |
| Congenital, familial and genetic disorders                          | Congenital joint malformation         | 1     | Glioblastoma multiforme                | Neoplasms benign, malignant and unspecified (incl cysts and polyps) |
| Investigations                                                      | Blood immunoglobulin A decreased      | 1     | Morose                                 | Psychiatric disorders                                               |
| Endocrine disorders                                                 | Oestrogen deficiency                  | 1     | Eye degenerative disorder              | Eye disorders                                                       |
| Infections and infestations                                         | Mycobacterium avium complex infection | 1     | Pseudomonas infection                  | Infections and infestations                                         |
| Neoplasms benign, malignant and unspecified (incl cysts and polyps) | Adenosquamous carcinoma of the cervix | 1     | Coagulation factor VII level increased | Investigations                                                      |
| Cardiac disorders                                                   | Aortic valve stenosis                 | 1     | Low turnover osteopathy                | Musculoskeletal and connective tissue disorders                     |
| Renal and urinary disorders                                         | Urge incontinence                     | 1     | Brain hypoxia                          | Respiratory, thoracic and mediastinal disorders                     |
| Infections and infestations                                         | Trichomoniasis                        | 1     | Gardnerella infection                  | Infections and infestations                                         |
| Investigations                                                      | Plasminogen increased                 | 1     | Adenosquamous carcinoma of the cervix  | Neoplasms benign, malignant and unspecified (incl cysts and polyps) |
| Neoplasms benign, malignant and unspecified (incl cysts and polyps) | Abdominal neoplasm                    | 1     | Arthritis infective                    | Infections and infestations                                         |
| Infections and infestations                                         | Syphilis                              | 1     | Mitral valve prolapse                  | Cardiac disorders                                                   |
| Metabolism and nutrition disorders                                  | Hypozinaemia                          | 1     | Sjogren's syndrome                     | Musculoskeletal and connective tissue disorders                     |
| Infections and infestations                                         | Streptococcal bacteraemia             | 1     | Hepatobiliary infection                | Infections and infestations                                         |
| Hepatobiliary disorders                                             | Hepatic cyst                          | 1     | Arthritis infective                    | Infections and infestations                                         |
| Injury, poisoning and procedural complications                      | Periorbital haematoma                 | 1     | Glycosylated haemoglobin decreased     | Investigations                                                      |
| Gastrointestinal disorders                                          | Bezoar                                | 1     | Blood aluminium increased              | Investigations                                                      |
| Renal and urinary disorders                                         | Urge incontinence                     | 1     | Cardiomyopathy neonatal                | Cardiac disorders                                                   |
| Congenital, familial and genetic disorders                          | Cryptorchism                          | 1     | Blood iron increased                   | Investigations                                                      |
| Infections and infestations                                         | Fungal sepsis                         | 1     | Pneumonia fungal                       | Infections and infestations                                         |
| Renal and urinary disorders                                         | Urge incontinence                     | 1     | Microangiopathy                        | Vascular disorders                                                  |

| Basis data for network                                              |                                      |       |                                       |                                                                     |
|---------------------------------------------------------------------|--------------------------------------|-------|---------------------------------------|---------------------------------------------------------------------|
| SOC1                                                                | AE1                                  | score | AE2                                   | SOC2                                                                |
| Ear and labyrinth disorders                                         | Middle ear effusion                  | 1     | Abdominal adhesions                   | Gastrointestinal disorders                                          |
| Investigations                                                      | Coagulation factor X level increased | 1     | Adenosquamous carcinoma of the cervix | Neoplasms benign, malignant and unspecified (incl cysts and polyps) |
| Reproductive system and breast disorders                            | Breast cyst                          | 1     | Colorectal cancer                     | Neoplasms benign, malignant and unspecified (incl cysts and polyps) |
| Eye disorders                                                       | Extraocular muscle paresis           | 1     | Mean cell haemoglobin decreased       | Investigations                                                      |
| General disorders and administration site conditions                | Implant expulsion                    | 1     | Blood growth hormone abnormal         | Investigations                                                      |
| Psychiatric disorders                                               | Blunted affect                       | 1     | Abasia                                | General disorders and administration site conditions                |
| Cardiac disorders                                                   | Aortic valve stenosis                | 1     | Parathyroid tumour benign             | Neoplasms benign, malignant and unspecified (incl cysts and polyps) |
| Neoplasms benign, malignant and unspecified (incl cysts and polyps) | T-cell lymphoma                      | 1     | Streptococcal bacteraemia             | Infections and infestations                                         |
| Gastrointestinal disorders                                          | Colonic stenosis                     | 1     | Ileal perforation                     | Gastrointestinal disorders                                          |
| Psychiatric disorders                                               | Trance                               | 1     | Communication disorder                | Psychiatric disorders                                               |
| Cardiac disorders                                                   | Cardiomyopathy neonatal              | 1     | Brain hypoxia                         | Respiratory, thoracic and mediastinal disorders                     |
| Neoplasms benign, malignant and unspecified (incl cysts and polyps) | Pituitary tumour                     | 1     | Glioblastoma multiforme               | Neoplasms benign, malignant and unspecified (incl cysts and polyps) |
| Eye disorders                                                       | Choroiditis                          | 1     | Lymph node pain                       | Blood and lymphatic system disorders                                |
| Neoplasms benign, malignant and unspecified (incl cysts and polyps) | Parathyroid tumour benign            | 1     | Low turnover osteopathy               | Musculoskeletal and connective tissue disorders                     |
| Investigations                                                      | Hepatic enzyme                       | 1     | Escherichia bacteraemia               | Infections and infestations                                         |
| Nervous system disorders                                            | Adrenergic syndrome                  | 1     | Blood pressure orthostatic increased  | Investigations                                                      |
| Injury, poisoning and procedural complications                      | Periorbital haematoma                | 1     | Abasia                                | General disorders and administration site conditions                |
| Congenital, familial and genetic disorders                          | Congenital joint malformation        | 1     | Neurofibromatosis                     | Congenital, familial and genetic disorders                          |
| Immune system disorders                                             | Behcet's syndrome                    | 1     | Liver induration                      | Hepatobiliary disorders                                             |
| Investigations                                                      | Coagulation factor X level increased | 1     | Plasminogen increased                 | Investigations                                                      |

| Basis data for network                                              |                                           |       |                                       |                                                                     |
|---------------------------------------------------------------------|-------------------------------------------|-------|---------------------------------------|---------------------------------------------------------------------|
| SOC1                                                                | AE1                                       | score | AE2                                   | SOC2                                                                |
| Psychiatric disorders                                               | Trance                                    | 1     | Aerophagia                            | Gastrointestinal disorders                                          |
| Congenital, familial and genetic disorders                          | Pulmonary hypoplasia                      | 1     | Neonatal hypotension                  | Vascular disorders                                                  |
| Congenital, familial and genetic disorders                          | Congenital joint malformation             | 1     | Pituitary tumour                      | Neoplasms benign, malignant and unspecified (incl cysts and polyps) |
| Reproductive system and breast disorders                            | Breast cyst                               | 1     | Adenosquamous carcinoma of the cervix | Neoplasms benign, malignant and unspecified (incl cysts and polyps) |
| Investigations                                                      | Blood creatine phosphokinase BB increased | 1     | Hepatobiliary infection               | Infections and infestations                                         |
| Congenital, familial and genetic disorders                          | Keratosis follicular                      | 1     | Parathyroid tumour benign             | Neoplasms benign, malignant and unspecified (incl cysts and polyps) |
| Nervous system disorders                                            | Drug withdrawal convulsions               | 1     | Negative thoughts                     | Psychiatric disorders                                               |
| Metabolism and nutrition disorders                                  | Lipomatosis                               | 1     | Ultrasound kidney abnormal            | Investigations                                                      |
| Neoplasms benign, malignant and unspecified (incl cysts and polyps) | Adenosquamous carcinoma of the cervix     | 1     | Colorectal cancer                     | Neoplasms benign, malignant and unspecified (incl cysts and polyps) |
| Vascular disorders                                                  | Microangiopathy                           | 1     | Epstein-Barr virus infection          | Infections and infestations                                         |
| Immune system disorders                                             | Allergy to arthropod bite                 | 1     | Oral infection                        | Infections and infestations                                         |
| Metabolism and nutrition disorders                                  | Fat intolerance                           | 1     | Uterine inflammation                  | Reproductive system and breast disorders                            |
| Neoplasms benign, malignant and unspecified (incl cysts and polyps) | Oral neoplasm                             | 1     | Oral mucosa atrophy                   | Gastrointestinal disorders                                          |
| Nervous system disorders                                            | Febrile convulsion                        | 1     | Gingival ulceration                   | Gastrointestinal disorders                                          |
| General disorders and administration site conditions                | Abasia                                    | 1     | Mastication disorder                  | Nervous system disorders                                            |
| Nervous system disorders                                            | Dyslexia                                  | 1     | Oral dysaesthesia                     | Gastrointestinal disorders                                          |
| Congenital, familial and genetic disorders                          | Homocystinaemia                           | 1     | Oculomotor study abnormal             | Investigations                                                      |
| Investigations                                                      | Blood immunoglobulin A decreased          | 1     | Soft tissue disorder                  | Musculoskeletal and connective tissue disorders                     |
| Eye disorders                                                       | Madarosis                                 | 1     | Cryptorchism                          | Congenital, familial and genetic disorders                          |
| Investigations                                                      | Vitamin D decreased                       | 1     | Gastritis alcoholic                   | Gastrointestinal disorders                                          |

| Basis data for network                          |                                        |       |                                     |                                                                     |
|-------------------------------------------------|----------------------------------------|-------|-------------------------------------|---------------------------------------------------------------------|
| SOC1                                            | AE1                                    | score | AE2                                 | SOC2                                                                |
| Vascular disorders                              | Arteriopathic disease                  | 1     | Diabetes mellitus insulin-dependent | Metabolism and nutrition disorders                                  |
| Respiratory, thoracic and mediastinal disorders | Asthma exercise induced                | 1     | Hypertelorism of orbit              | Congenital, familial and genetic disorders                          |
| Psychiatric disorders                           | Suspiciousness                         | 1     | Periorbital haematoma               | Injury, poisoning and procedural complications                      |
| Investigations                                  | Mean cell volume abnormal              | 1     | Heart sounds abnormal               | Investigations                                                      |
| Investigations                                  | Urine iron increased                   | 1     | Blood zinc increased                | Investigations                                                      |
| Vascular disorders                              | Shock haemorrhagic                     | 1     | Streptococcal bacteraemia           | Infections and infestations                                         |
| Respiratory, thoracic and mediastinal disorders | Brain hypoxia                          | 1     | Diabetes mellitus insulin-dependent | Metabolism and nutrition disorders                                  |
| Congenital, familial and genetic disorders      | Moebius II syndrome                    | 1     | Postpartum haemorrhage              | Pregnancy, puerperium and perinatal conditions                      |
| Respiratory, thoracic and mediastinal disorders | Pulmonary microemboli                  | 1     | Yersinia infection                  | Infections and infestations                                         |
| Musculoskeletal and connective tissue disorders | Coccydynia                             | 1     | Glycosylated haemoglobin decreased  | Investigations                                                      |
| Musculoskeletal and connective tissue disorders | Periarticular disorder                 | 1     | Histone antibody positive           | Investigations                                                      |
| Nervous system disorders                        | Febrile convulsion                     | 1     | Computerised tomogram abnormal      | Investigations                                                      |
| Investigations                                  | Plasminogen increased                  | 1     | Vaginal cancer                      | Neoplasms benign, malignant and unspecified (incl cysts and polyps) |
| Infections and infestations                     | Herpetic stomatitis                    | 1     | Fungal oesophagitis                 | Infections and infestations                                         |
| Infections and infestations                     | Haemophilus sepsis                     | 1     | Lung abscess                        | Infections and infestations                                         |
| Nervous system disorders                        | Intention tremor                       | 1     | Glycosylated haemoglobin decreased  | Investigations                                                      |
| Cardiac disorders                               | Cardiomyopathy neonatal                | 1     | Epstein-Barr virus infection        | Infections and infestations                                         |
| Infections and infestations                     | Herpetic stomatitis                    | 1     | Creatinine urine decreased          | Investigations                                                      |
| Infections and infestations                     | Gastroenteritis cryptosporidial        | 1     | Pancreatorenal syndrome             | Renal and urinary disorders                                         |
| Investigations                                  | Coagulation factor VII level increased | 1     | Alpha-1 anti-trypsin increased      | Investigations                                                      |

| Basis data for network                                              |                                         |       |                                            |                                                                     |
|---------------------------------------------------------------------|-----------------------------------------|-------|--------------------------------------------|---------------------------------------------------------------------|
| SOC1                                                                | AE1                                     | score | AE2                                        | SOC2                                                                |
| Investigations                                                      | Electrocardiogram QRS complex shortened | 1     | Electrocardiogram QRS complex              | Investigations                                                      |
| Congenital, familial and genetic disorders                          | Factor V deficiency                     | 1     | Hepatic vein thrombosis                    | Hepatobiliary disorders                                             |
| Investigations                                                      | Histone antibody positive               | 1     | Blood testosterone free increased          | Investigations                                                      |
| Investigations                                                      | Coagulation factor X level increased    | 1     | Vaginal cancer                             | Neoplasms benign, malignant and unspecified (incl cysts and polyps) |
| Infections and infestations                                         | Central line infection                  | 1     | Pseudomonas infection                      | Infections and infestations                                         |
| Investigations                                                      | Creatinine urine decreased              | 1     | Fungal oesophagitis                        | Infections and infestations                                         |
| Nervous system disorders                                            | Acalculia                               | 1     | Gerstmann's syndrome                       | Nervous system disorders                                            |
| Infections and infestations                                         | Plasmodium falciparum infection         | 1     | Electrocardiogram normal                   | Investigations                                                      |
| Psychiatric disorders                                               | Negative thoughts                       | 1     | Lennox-Gastaut syndrome                    | Nervous system disorders                                            |
| General disorders and administration site conditions                | Abasia                                  | 1     | Parkinsonian rest tremor                   | Nervous system disorders                                            |
| Neoplasms benign, malignant and unspecified (incl cysts and polyps) | Anaplastic thyroid cancer               | 1     | Middle ear effusion                        | Ear and labyrinth disorders                                         |
| Reproductive system and breast disorders                            | Uterine pain                            | 1     | Von Willebrand's factor multimers abnormal | Investigations                                                      |
| Neoplasms benign, malignant and unspecified (incl cysts and polyps) | Adenosquamous carcinoma of the cervix   | 1     | Alpha-1 anti-trypsin increased             | Investigations                                                      |
| Infections and infestations                                         | Pseudomonal sepsis                      | 1     | Metastatic neoplasm                        | Neoplasms benign, malignant and unspecified (incl cysts and polyps) |
| Neoplasms benign, malignant and unspecified (incl cysts and polyps) | Breast cancer female                    | 1     | Allergy to arthropod bite                  | Immune system disorders                                             |
| Respiratory, thoracic and mediastinal disorders                     | Respiratory tract haemorrhage           | 1     | Troponin increased                         | Investigations                                                      |
| Neoplasms benign, malignant and unspecified (incl cysts and polyps) | Testis cancer                           | 1     | Coagulation factor IX level increased      | Investigations                                                      |
| Congenital, familial and genetic disorders                          | Moebius II syndrome                     | 1     | Congenital bladder anomaly                 | Congenital, familial and genetic disorders                          |
| Congenital, familial and genetic disorders                          | Factor V deficiency                     | 1     | Acute prerenal failure                     | Renal and urinary disorders                                         |
| Psychiatric disorders                                               | Blunted affect                          | 1     | Flat affect                                | Psychiatric disorders                                               |

| Basis data for network                                              |                                 |       |                                    |                                                                     |
|---------------------------------------------------------------------|---------------------------------|-------|------------------------------------|---------------------------------------------------------------------|
| SOC1                                                                | AE1                             | score | AE2                                | SOC2                                                                |
| Cardiac disorders                                                   | Cardiomyopathy neonatal         | 1     | Glomerular vascular disorder       | Renal and urinary disorders                                         |
| Congenital, familial and genetic disorders                          | Spine malformation              | 1     | Middle ear effusion                | Ear and labyrinth disorders                                         |
| Investigations                                                      | Urine calcium decreased         | 1     | Gammopathy                         | Neoplasms benign, malignant and unspecified (incl cysts and polyps) |
| Infections and infestations                                         | Abscess soft tissue             | 1     | Transient acantholytic dermatosis  | Skin and subcutaneous tissue disorders                              |
| Gastrointestinal disorders                                          | Abdominal adhesions             | 1     | Gastrointestinal stromal tumour    | Neoplasms benign, malignant and unspecified (incl cysts and polyps) |
| Nervous system disorders                                            | Drug withdrawal convulsions     | 1     | Neuralgic amyotrophy               | Nervous system disorders                                            |
| Pregnancy, puerperium and perinatal conditions                      | Retained placenta or membranes  | 1     | Microtia                           | Congenital, familial and genetic disorders                          |
| Neoplasms benign, malignant and unspecified (incl cysts and polyps) | Metastatic neoplasm             | 1     | Bacterial sepsis                   | Infections and infestations                                         |
| Psychiatric disorders                                               | Orgasmic sensation decreased    | 1     | Premature menopause                | Reproductive system and breast disorders                            |
| Respiratory, thoracic and mediastinal disorders                     | Respiratory tract haemorrhage   | 1     | Pneumonia viral                    | Infections and infestations                                         |
| Musculoskeletal and connective tissue disorders                     | Lumbar spinal stenosis          | 1     | Electrocardiogram Q wave abnormal  | Investigations                                                      |
| Musculoskeletal and connective tissue disorders                     | Soft tissue disorder            | 1     | Morose                             | Psychiatric disorders                                               |
| Neoplasms benign, malignant and unspecified (incl cysts and polyps) | Breast cancer female            | 1     | Purpura senile                     | Skin and subcutaneous tissue disorders                              |
| Nervous system disorders                                            | Dizziness exertional            | 1     | Abasia                             | General disorders and administration site conditions                |
| Infections and infestations                                         | Pneumonia klebsiella            | 1     | Blastomycosis                      | Infections and infestations                                         |
| Investigations                                                      | Blood iron increased            | 1     | Madarosis                          | Eye disorders                                                       |
| Congenital, familial and genetic disorders                          | Congenital great vessel anomaly | 1     | Optic nerve hypoplasia             | Congenital, familial and genetic disorders                          |
| Psychiatric disorders                                               | Hallucination, tactile          | 1     | Glycosylated haemoglobin decreased | Investigations                                                      |
| Neoplasms benign, malignant and unspecified (incl cysts and polyps) | Anaplastic thyroid cancer       | 1     | Gastrointestinal stromal tumour    | Neoplasms benign, malignant and unspecified (incl cysts and polyps) |
| Investigations                                                      | Hepatic enzyme                  | 1     | Glucose tolerance test abnormal    | Investigations                                                      |

| Basis data for network                               |                                       |       |                                      |                                                                     |
|------------------------------------------------------|---------------------------------------|-------|--------------------------------------|---------------------------------------------------------------------|
| SOC1                                                 | AE1                                   | score | AE2                                  | SOC2                                                                |
| Gastrointestinal disorders                           | Eosinophilic colitis                  | 1     | Oculomotor study abnormal            | Investigations                                                      |
| Psychiatric disorders                                | Negative thoughts                     | 1     | Intracranial venous sinus thrombosis | Nervous system disorders                                            |
| Respiratory, thoracic and mediastinal disorders      | Bronchial oedema                      | 1     | Red blood cell agglutination         | Blood and lymphatic system disorders                                |
| Ear and labyrinth disorders                          | Ear congestion                        | 1     | Penile infection                     | Infections and infestations                                         |
| Investigations                                       | Coagulation factor X level increased  | 1     | Testis cancer                        | Neoplasms benign, malignant and unspecified (incl cysts and polyps) |
| Infections and infestations                          | Abdominal abscess                     | 1     | Injection site pustule               | Infections and infestations                                         |
| Musculoskeletal and connective tissue disorders      | Osteitis deformans                    | 1     | Oral fungal infection                | Infections and infestations                                         |
| Investigations                                       | Coagulation factor IX level increased | 1     | Colorectal cancer                    | Neoplasms benign, malignant and unspecified (incl cysts and polyps) |
| Injury, poisoning and procedural complications       | Periorbital haematoma                 | 1     | Coccydynia                           | Musculoskeletal and connective tissue disorders                     |
| Cardiac disorders                                    | Cardiac failure chronic               | 1     | Ejection fraction abnormal           | Investigations                                                      |
| Musculoskeletal and connective tissue disorders      | Hypertonia neonatal                   | 1     | Convulsion neonatal                  | Nervous system disorders                                            |
| Investigations                                       | Coagulation factor IX level increased | 1     | Plasminogen increased                | Investigations                                                      |
| Investigations                                       | Blood testosterone free increased     | 1     | Periarticular disorder               | Musculoskeletal and connective tissue disorders                     |
| Vascular disorders                                   | Aneurysm ruptured                     | 1     | Duodenal neoplasm                    | Neoplasms benign, malignant and unspecified (incl cysts and polyps) |
| Investigations                                       | Blood acid phosphatase increased      | 1     | Abdominal adhesions                  | Gastrointestinal disorders                                          |
| Injury, poisoning and procedural complications       | Periorbital haematoma                 | 1     | Intention tremor                     | Nervous system disorders                                            |
| Congenital, familial and genetic disorders           | Optic nerve hypoplasia                | 1     | Scrotal ulcer                        | Reproductive system and breast disorders                            |
| General disorders and administration site conditions | Application site scar                 | 1     | Trichomoniasis                       | Infections and infestations                                         |
| Investigations                                       | Electrocardiogram normal              | 1     | Deafness congenital                  | Congenital, familial and genetic disorders                          |
| Gastrointestinal disorders                           | Aerophagia                            | 1     | Perseveration                        | Psychiatric disorders                                               |



| Basis data for network                                              |                                       |       |                                           |                                                                     |
|---------------------------------------------------------------------|---------------------------------------|-------|-------------------------------------------|---------------------------------------------------------------------|
| SOC1                                                                | AE1                                   | score | AE2                                       | SOC2                                                                |
| Neoplasms benign, malignant and unspecified (incl cysts and polyps) | Testis cancer                         | 1     | Colorectal cancer                         | Neoplasms benign, malignant and unspecified (incl cysts and polyps) |
| Infections and infestations                                         | Bacterial sepsis                      | 1     | Hepatic enzyme                            | Investigations                                                      |
| Nervous system disorders                                            | Dizziness exertional                  | 1     | Periorbital haematoma                     | Injury, poisoning and procedural complications                      |
| Psychiatric disorders                                               | Trance                                | 1     | Perseveration                             | Psychiatric disorders                                               |
| Infections and infestations                                         | Oral infection                        | 1     | Breast cancer female                      | Neoplasms benign, malignant and unspecified (incl cysts and polyps) |
| Neoplasms benign, malignant and unspecified (incl cysts and polyps) | T-cell lymphoma                       | 1     | Blood creatine phosphokinase MM increased | Investigations                                                      |
| Metabolism and nutrition disorders                                  | Carnitine deficiency                  | 1     | Bleeding time abnormal                    | Investigations                                                      |
| Investigations                                                      | Blood iron increased                  | 1     | Haptoglobin increased                     | Investigations                                                      |
| Ear and labyrinth disorders                                         | Aural polyp                           | 1     | Herpetic stomatitis                       | Infections and infestations                                         |
| Investigations                                                      | Ejection fraction abnormal            | 1     | Troponin I increased                      | Investigations                                                      |
| Infections and infestations                                         | Bullous impetigo                      | 1     | Urge incontinence                         | Renal and urinary disorders                                         |
| General disorders and administration site conditions                | Loss of control of legs               | 1     | Tearfulness                               | Psychiatric disorders                                               |
| Investigations                                                      | Coagulation factor IX level increased | 1     | Breast cyst                               | Reproductive system and breast disorders                            |
| Neoplasms benign, malignant and unspecified (incl cysts and polyps) | Bronchial neoplasm                    | 1     | Bronchioloalveolar carcinoma              | Neoplasms benign, malignant and unspecified (incl cysts and polyps) |
| Investigations                                                      | Ejection fraction abnormal            | 1     | Embolism venous                           | Vascular disorders                                                  |
| Ear and labyrinth disorders                                         | Aural polyp                           | 1     | Creatinine urine decreased                | Investigations                                                      |
| Nervous system disorders                                            | Cerebral atrophy                      | 1     | Coarctation of the aorta                  | Congenital, familial and genetic disorders                          |
| Investigations                                                      | Glycosylated haemoglobin decreased    | 1     | Dizziness exertional                      | Nervous system disorders                                            |
| Renal and urinary disorders                                         | Urge incontinence                     | 1     | Diabetes mellitus insulin-dependent       | Metabolism and nutrition disorders                                  |
| Investigations                                                      | Glycosylated haemoglobin decreased    | 1     | Blunted affect                            | Psychiatric disorders                                               |

| Basis data for network                                              |                                               |       |                                    |                                                                     |
|---------------------------------------------------------------------|-----------------------------------------------|-------|------------------------------------|---------------------------------------------------------------------|
| SOC1                                                                | AE1                                           | score | AE2                                | SOC2                                                                |
| Infections and infestations                                         | Fungal rash                                   | 1     | Subdural haemorrhage               | Injury, poisoning and procedural complications                      |
| Neoplasms benign, malignant and unspecified (incl cysts and polyps) | Vaginal cancer                                | 1     | Breast cyst                        | Reproductive system and breast disorders                            |
| Neoplasms benign, malignant and unspecified (incl cysts and polyps) | Anaplastic thyroid cancer                     | 1     | Blood acid phosphatase increased   | Investigations                                                      |
| Musculoskeletal and connective tissue disorders                     | Purple glove syndrome                         | 1     | Acromegaly                         | Endocrine disorders                                                 |
| Skin and subcutaneous tissue disorders                              | Purpura senile                                | 1     | Oral infection                     | Infections and infestations                                         |
| Congenital, familial and genetic disorders                          | Optic nerve hypoplasia                        | 1     | Thymus hypoplasia                  | Congenital, familial and genetic disorders                          |
| Infections and infestations                                         | Bullous impetigo                              | 1     | Arteriopathic disease              | Vascular disorders                                                  |
| Neoplasms benign, malignant and unspecified (incl cysts and polyps) | Vaginal cancer                                | 1     | Colorectal cancer                  | Neoplasms benign, malignant and unspecified (incl cysts and polyps) |
| Eye disorders                                                       | Retinal deposits                              | 1     | Food poisoning                     | Gastrointestinal disorders                                          |
| Psychiatric disorders                                               | Hallucination, tactile                        | 1     | Periorbital haematoma              | Injury, poisoning and procedural complications                      |
| Eye disorders                                                       | Eye degenerative disorder                     | 1     | Neck mass                          | Musculoskeletal and connective tissue disorders                     |
| Infections and infestations                                         | Pelvic infection                              | 1     | Painful erection                   | Reproductive system and breast disorders                            |
| Investigations                                                      | Blood creatine phosphokinase MM increased     | 1     | Hepatobiliary infection            | Infections and infestations                                         |
| Neoplasms benign, malignant and unspecified (incl cysts and polyps) | Adenosquamous carcinoma of the cervix         | 1     | Vaginal cancer                     | Neoplasms benign, malignant and unspecified (incl cysts and polyps) |
| Infections and infestations                                         | Bullous impetigo                              | 1     | Brain hypoxia                      | Respiratory, thoracic and mediastinal disorders                     |
| Nervous system disorders                                            | Mastication disorder                          | 1     | Glycosylated haemoglobin decreased | Investigations                                                      |
| Investigations                                                      | Globulins decreased                           | 1     | Retinal deposits                   | Eye disorders                                                       |
| Infections and infestations                                         | Acute sinusitis                               | 1     | Urea urine increased               | Investigations                                                      |
| Eye disorders                                                       | Extraocular muscle paresis                    | 1     | Secretion discharge                | General disorders and administration site conditions                |
| Skin and subcutaneous tissue disorders                              | Pityriasis lichenoides et varioliformis acuta | 1     | Anaemia Heinz body                 | Blood and lymphatic system disorders                                |

| Basis data for network                                              |                                      |       |                                           |                                                                     |
|---------------------------------------------------------------------|--------------------------------------|-------|-------------------------------------------|---------------------------------------------------------------------|
| SOC1                                                                | AE1                                  | score | AE2                                       | SOC2                                                                |
| Vascular disorders                                                  | Shock haemorrhagic                   | 1     | Hepatobiliary infection                   | Infections and infestations                                         |
| Gastrointestinal disorders                                          | Necrotising enterocolitis neonatal   | 1     | Nose deformity                            | Musculoskeletal and connective tissue disorders                     |
| Investigations                                                      | Urine calcium decreased              | 1     | Blood 25-hydroxycholecalciferol increased | Investigations                                                      |
| Infections and infestations                                         | Carbuncle                            | 1     | Intestinal mass                           | Gastrointestinal disorders                                          |
| Infections and infestations                                         | Pseudomonal sepsis                   | 1     | Hepatic enzyme                            | Investigations                                                      |
| Investigations                                                      | Coagulation factor X level increased | 1     | Coagulation factor IX level increased     | Investigations                                                      |
| Investigations                                                      | PCO2 increased                       | 1     | Mean cell haemoglobin decreased           | Investigations                                                      |
| Ear and labyrinth disorders                                         | Aural polyp                          | 1     | Fungal oesophagitis                       | Infections and infestations                                         |
| Nervous system disorders                                            | Drug withdrawal convulsions          | 1     | Lennox-Gastaut syndrome                   | Nervous system disorders                                            |
| Neoplasms benign, malignant and unspecified (incl cysts and polyps) | Metastatic neoplasm                  | 1     | Hepatic enzyme                            | Investigations                                                      |
| General disorders and administration site conditions                | Abasia                               | 1     | Flat affect                               | Psychiatric disorders                                               |
| Investigations                                                      | White blood cell morphology abnormal | 1     | Polycythaemia vera                        | Neoplasms benign, malignant and unspecified (incl cysts and polyps) |
| Neoplasms benign, malignant and unspecified (incl cysts and polyps) | Parathyroid tumour benign            | 1     | Sweat gland infection                     | Infections and infestations                                         |
| Congenital, familial and genetic disorders                          | Spine malformation                   | 1     | Blood acid phosphatase increased          | Investigations                                                      |
| Gastrointestinal disorders                                          | Tooth loss                           | 1     | Tooth deposit                             | Gastrointestinal disorders                                          |
| Investigations                                                      | Ceruloplasmin increased              | 1     | Coagulation factor X level increased      | Investigations                                                      |
| General disorders and administration site conditions                | Instillation site pain               | 1     | Ear haemorrhage                           | Ear and labyrinth disorders                                         |
| Nervous system disorders                                            | Parkinsonian rest tremor             | 1     | Mendelson's syndrome                      | Respiratory, thoracic and mediastinal disorders                     |
| Investigations                                                      | Electroencephalogram                 | 1     | Pelvic infection                          | Infections and infestations                                         |
| General disorders and administration site conditions                | Injection site paraesthesia          | 1     | Blood growth hormone abnormal             | Investigations                                                      |

| Basis data for network                                              |                                    |       |                                         |                                                                     |
|---------------------------------------------------------------------|------------------------------------|-------|-----------------------------------------|---------------------------------------------------------------------|
| SOC1                                                                | AE1                                | score | AE2                                     | SOC2                                                                |
| Congenital, familial and genetic disorders                          | Cryptorchism                       | 1     | Supernumerary nipple                    | Congenital, familial and genetic disorders                          |
| Injury, poisoning and procedural complications                      | Scratch                            | 1     | Glycosylated haemoglobin decreased      | Investigations                                                      |
| Metabolism and nutrition disorders                                  | Podagra                            | 1     | Alkaptonuria                            | Congenital, familial and genetic disorders                          |
| Injury, poisoning and procedural complications                      | Cartilage injury                   | 1     | Gastroduodenal haemorrhage              | Gastrointestinal disorders                                          |
| Eye disorders                                                       | Chorioretinal atrophy              | 1     | Visual field tests abnormal             | Investigations                                                      |
| Musculoskeletal and connective tissue disorders                     | Trigger finger                     | 1     | Cold agglutinins positive               | Investigations                                                      |
| Neoplasms benign, malignant and unspecified (incl cysts and polyps) | Acanthoma                          | 1     | Polymorphic light eruption              | Skin and subcutaneous tissue disorders                              |
| Investigations                                                      | Haemoglobin                        | 1     | Drug level increased                    | Investigations                                                      |
| Investigations                                                      | Glycosylated haemoglobin decreased | 1     | Parkinsonian rest tremor                | Nervous system disorders                                            |
| Investigations                                                      | Globulins decreased                | 1     | Abscess of salivary gland               | Infections and infestations                                         |
| Congenital, familial and genetic disorders                          | Pierre Robin syndrome              | 1     | Viral upper respiratory tract infection | Infections and infestations                                         |
| Investigations                                                      | Electrocardiogram PR interval      | 1     | Metastases to liver                     | Neoplasms benign, malignant and unspecified (incl cysts and polyps) |
| Neoplasms benign, malignant and unspecified (incl cysts and polyps) | Glioblastoma multiforme            | 1     | Anal atresia                            | Congenital, familial and genetic disorders                          |
| Congenital, familial and genetic disorders                          | Neurofibromatosis                  | 1     | Malignant hydatidiform mole             | Neoplasms benign, malignant and unspecified (incl cysts and polyps) |
| Neoplasms benign, malignant and unspecified (incl cysts and polyps) | T-cell lymphoma                    | 1     | Spinal cord injury                      | Injury, poisoning and procedural complications                      |
| Congenital, familial and genetic disorders                          | Neurofibromatosis                  | 1     | Dwarfism                                | Musculoskeletal and connective tissue disorders                     |
| Neoplasms benign, malignant and unspecified (incl cysts and polyps) | Hepatoblastoma                     | 1     | Congenital joint malformation           | Congenital, familial and genetic disorders                          |
| Injury, poisoning and procedural complications                      | Periorbital haematoma              | 1     | Spontaneous penile erection             | Reproductive system and breast disorders                            |
| Infections and infestations                                         | Periodontal destruction            | 1     | Globulins decreased                     | Investigations                                                      |
| Neoplasms benign, malignant and unspecified (incl cysts and polyps) | Laryngeal neoplasm                 | 1     | Abdominal adhesions                     | Gastrointestinal disorders                                          |

| Basis data for network                                              |                                          |       |                              |                                                                     |
|---------------------------------------------------------------------|------------------------------------------|-------|------------------------------|---------------------------------------------------------------------|
| SOC1                                                                | AE1                                      | score | AE2                          | SOC2                                                                |
| Infections and infestations                                         | Epstein-Barr virus infection             | 1     | Glomerular vascular disorder | Renal and urinary disorders                                         |
| Investigations                                                      | International normalised ratio decreased | 1     | T-cell lymphoma              | Neoplasms benign, malignant and unspecified (incl cysts and polyps) |
| Investigations                                                      | Blood iron increased                     | 1     | Supernumerary nipple         | Congenital, familial and genetic disorders                          |
| Gastrointestinal disorders                                          | Abdominal adhesions                      | 1     | Migraine with aura           | Nervous system disorders                                            |
| Neoplasms benign, malignant and unspecified (incl cysts and polyps) | Parathyroid tumour                       | 1     | Sickle cell anaemia          | Congenital, familial and genetic disorders                          |
| Pregnancy, puerperium and perinatal conditions                      | Labour complication                      | 1     | Antepartum haemorrhage       | Pregnancy, puerperium and perinatal conditions                      |
| Congenital, familial and genetic disorders                          | Thymus hypoplasia                        | 1     | Scrotal ulcer                | Reproductive system and breast disorders                            |
| Vascular disorders                                                  | Aneurysm ruptured                        | 1     | Hydroureter                  | Renal and urinary disorders                                         |
| Congenital, familial and genetic disorders                          | Congenital joint malformation            | 1     | Phosphenes                   | Eye disorders                                                       |
| Eye disorders                                                       | Madarosis                                | 1     | Lymphoma cutis               | Neoplasms benign, malignant and unspecified (incl cysts and polyps) |
| Investigations                                                      | Glycosylated haemoglobin decreased       | 1     | Self mutilation              | Injury, poisoning and procedural complications                      |
| Infections and infestations                                         | Pharyngeal candidiasis                   | 1     | Creatinine urine decreased   | Investigations                                                      |
| Neoplasms benign, malignant and unspecified (incl cysts and polyps) | Malignant hydatidiform mole              | 1     | Glioblastoma multiforme      | Neoplasms benign, malignant and unspecified (incl cysts and polyps) |
| Investigations                                                      | Creatinine urine decreased               | 1     | Myringitis                   | Infections and infestations                                         |
| Neoplasms benign, malignant and unspecified (incl cysts and polyps) | Glioblastoma multiforme                  | 1     | Dwarfism                     | Musculoskeletal and connective tissue disorders                     |
| Investigations                                                      | Ejection fraction abnormal               | 1     | Pancreatic disorder          | Gastrointestinal disorders                                          |
| Infections and infestations                                         | Myringitis                               | 1     | Pharyngeal candidiasis       | Infections and infestations                                         |
| Infections and infestations                                         | Candida sepsis                           | 1     | Pseudomonal sepsis           | Infections and infestations                                         |
| Gastrointestinal disorders                                          | Gastroduodenal haemorrhage               | 1     | Purpura senile               | Skin and subcutaneous tissue disorders                              |
| Infections and infestations                                         | Ureteritis                               | 1     | Ovarian fibrosis             | Reproductive system and breast disorders                            |

| Basis data for network                                              |                            |       |                                      |                                                 |
|---------------------------------------------------------------------|----------------------------|-------|--------------------------------------|-------------------------------------------------|
| SOC1                                                                | AE1                        | score | AE2                                  | SOC2                                            |
| Congenital, familial and genetic disorders                          | Optic nerve hypoplasia     | 1     | Lower respiratory tract inflammation | Respiratory, thoracic and mediastinal disorders |
| Respiratory, thoracic and mediastinal disorders                     | Mendelson's syndrome       | 1     | Periorbital haematoma                | Injury, poisoning and procedural complications  |
| Skin and subcutaneous tissue disorders                              | Red man syndrome           | 1     | Saliva discolouration                | Gastrointestinal disorders                      |
| Investigations                                                      | Protein urine              | 1     | Sudden onset of sleep                | Nervous system disorders                        |
| Neoplasms benign, malignant and unspecified (incl cysts and polyps) | Bile duct cancer           | 1     | Hepatic enzyme                       | Investigations                                  |
| Metabolism and nutrition disorders                                  | Fluid intake reduced       | 1     | Clubbing                             | Musculoskeletal and connective tissue disorders |
| Infections and infestations                                         | Pelvic abscess             | 1     | Fungal rash                          | Infections and infestations                     |
| Congenital, familial and genetic disorders                          | Congenital bladder anomaly | 1     | Postpartum haemorrhage               | Pregnancy, puerperium and perinatal conditions  |
| General disorders and administration site conditions                | Infusion site warmth       | 1     | Neutrophil percentage increased      | Investigations                                  |
| Infections and infestations                                         | Systemic candida           | 1     | Glucose tolerance test abnormal      | Investigations                                  |
| Gastrointestinal disorders                                          | Food poisoning             | 1     | Kidney infection                     | Infections and infestations                     |
| Neoplasms benign, malignant and unspecified (incl cysts and polyps) | Colorectal cancer          | 1     | Ceruloplasmin increased              | Investigations                                  |
| Infections and infestations                                         | Gingival infection         | 1     | Sickle cell anaemia                  | Congenital, familial and genetic disorders      |
| Psychiatric disorders                                               | Suspiciousness             | 1     | Blunted affect                       | Psychiatric disorders                           |
| Gastrointestinal disorders                                          | Gastroesophagitis          | 1     | Arteriopathic disease                | Vascular disorders                              |
| Nervous system disorders                                            | Gerstmann's syndrome       | 1     | Lactate pyruvate ratio increased     | Investigations                                  |
| Gastrointestinal disorders                                          | Saliva discolouration      | 1     | Urine vitamin K decreased            | Investigations                                  |
| Eye disorders                                                       | Chorioretinopathy          | 1     | Posterior capsule opacification      | Eye disorders                                   |
| Injury, poisoning and procedural complications                      | Chemical eye injury        | 1     | Ear haemorrhage                      | Ear and labyrinth disorders                     |
| Eye disorders                                                       | Diabetic retinopathy       | 1     | Oestrogen deficiency                 | Endocrine disorders                             |

| Basis data for network                                              |                                        |       |                                          |                                                                     |
|---------------------------------------------------------------------|----------------------------------------|-------|------------------------------------------|---------------------------------------------------------------------|
| SOC1                                                                | AE1                                    | score | AE2                                      | SOC2                                                                |
| Hepatobiliary disorders                                             | Hepatic vein thrombosis                | 1     | Arterial haemorrhage                     | Vascular disorders                                                  |
| Reproductive system and breast disorders                            | Breast cyst                            | 1     | Ceruloplasmin increased                  | Investigations                                                      |
| Hepatobiliary disorders                                             | Chronic hepatitis                      | 1     | Chondrodystrophy                         | Congenital, familial and genetic disorders                          |
| Vascular disorders                                                  | Shock haemorrhagic                     | 1     | Spinal cord injury                       | Injury, poisoning and procedural complications                      |
| Renal and urinary disorders                                         | Urinary tract pain                     | 1     | Histone antibody positive                | Investigations                                                      |
| Skin and subcutaneous tissue disorders                              | Penile ulceration                      | 1     | Eosinophilic pustular folliculitis       | Skin and subcutaneous tissue disorders                              |
| Vascular disorders                                                  | Shock haemorrhagic                     | 1     | International normalised ratio decreased | Investigations                                                      |
| Musculoskeletal and connective tissue disorders                     | Nose deformity                         | 1     | Coronary artery dissection               | Cardiac disorders                                                   |
| Nervous system disorders                                            | Neuralgic amyotrophy                   | 1     | Corneal scar                             | Eye disorders                                                       |
| Investigations                                                      | Blood acid phosphatase increased       | 1     | Pelvic peritoneal adhesions              | Reproductive system and breast disorders                            |
| Investigations                                                      | Troponin I increased                   | 1     | Cardiac failure chronic                  | Cardiac disorders                                                   |
| Neoplasms benign, malignant and unspecified (incl cysts and polyps) | Adrenal neoplasm                       | 1     | Total cholesterol/HDL ratio decreased    | Investigations                                                      |
| Infections and infestations                                         | Gastroenteritis cryptosporidial        | 1     | High density lipoprotein abnormal        | Investigations                                                      |
| Respiratory, thoracic and mediastinal disorders                     | Acquired tracheo-oesophageal fistula   | 1     | Pituitary tumour                         | Neoplasms benign, malignant and unspecified (incl cysts and polyps) |
| Metabolism and nutrition disorders                                  | Vitamin D deficiency                   | 1     | Urinary tract malformation               | Congenital, familial and genetic disorders                          |
| Skin and subcutaneous tissue disorders                              | Purpura senile                         | 1     | Wrist fracture                           | Injury, poisoning and procedural complications                      |
| Psychiatric disorders                                               | Flat affect                            | 1     | Mastication disorder                     | Nervous system disorders                                            |
| Investigations                                                      | Very low density lipoprotein decreased | 1     | Nipple exudate bloody                    | Reproductive system and breast disorders                            |
| Infections and infestations                                         | Tinea versicolour                      | 1     | Low turnover osteopathy                  | Musculoskeletal and connective tissue disorders                     |
| Investigations                                                      | Electrophoresis abnormal               | 1     | Haemoglobin                              | Investigations                                                      |

| Basis data for network                                              |                               |       |                                          |                                                                     |
|---------------------------------------------------------------------|-------------------------------|-------|------------------------------------------|---------------------------------------------------------------------|
| SOC1                                                                | AE1                           | score | AE2                                      | SOC2                                                                |
| Skin and subcutaneous tissue disorders                              | Skin chapped                  | 1     | Tympanic membrane disorder               | Ear and labyrinth disorders                                         |
| General disorders and administration site conditions                | Abasia                        | 1     | Glycosylated haemoglobin increased       | Investigations                                                      |
| Neoplasms benign, malignant and unspecified (incl cysts and polyps) | Bladder papilloma             | 1     | Biliary dilatation                       | Hepatobiliary disorders                                             |
| Reproductive system and breast disorders                            | Spontaneous penile erection   | 1     | Glycosylated haemoglobin decreased       | Investigations                                                      |
| Neoplasms benign, malignant and unspecified (incl cysts and polyps) | Hepatoblastoma                | 1     | Pituitary tumour                         | Neoplasms benign, malignant and unspecified (incl cysts and polyps) |
| Investigations                                                      | Blood growth hormone abnormal | 1     | Throat cancer                            | Neoplasms benign, malignant and unspecified (incl cysts and polyps) |
| Respiratory, thoracic and mediastinal disorders                     | Asthma exercise induced       | 1     | Lower respiratory tract inflammation     | Respiratory, thoracic and mediastinal disorders                     |
| Congenital, familial and genetic disorders                          | Spine malformation            | 1     | Pelvic peritoneal adhesions              | Reproductive system and breast disorders                            |
| Infections and infestations                                         | Oral fungal infection         | 1     | Viral upper respiratory tract infection  | Infections and infestations                                         |
| Infections and infestations                                         | Helicobacter infection        | 1     | Sickle cell anaemia                      | Congenital, familial and genetic disorders                          |
| Congenital, familial and genetic disorders                          | Neurofibromatosis             | 1     | Anal atresia                             | Congenital, familial and genetic disorders                          |
| Investigations                                                      | Capillary fragility increased | 1     | Diabetic retinopathy                     | Eye disorders                                                       |
| Infections and infestations                                         | Bacterial sepsis              | 1     | Metastases to lung                       | Neoplasms benign, malignant and unspecified (incl cysts and polyps) |
| Infections and infestations                                         | Listeriosis                   | 1     | Pleural rub                              | Respiratory, thoracic and mediastinal disorders                     |
| Eye disorders                                                       | Scleromalacia                 | 1     | Chorioretinopathy                        | Eye disorders                                                       |
| Investigations                                                      | Ceruloplasmin increased       | 1     | Testis cancer                            | Neoplasms benign, malignant and unspecified (incl cysts and polyps) |
| Injury, poisoning and procedural complications                      | Cephalhaematoma               | 1     | Chronic hepatitis                        | Hepatobiliary disorders                                             |
| Injury, poisoning and procedural complications                      | Self mutilation               | 1     | Mastication disorder                     | Nervous system disorders                                            |
| Musculoskeletal and connective tissue disorders                     | Buttock pain                  | 1     | Abasia                                   | General disorders and administration site conditions                |
| Injury, poisoning and procedural complications                      | Spinal cord injury            | 1     | International normalised ratio decreased | Investigations                                                      |



| Basis data for network                                              |                               |       |                                      |                                                                     |
|---------------------------------------------------------------------|-------------------------------|-------|--------------------------------------|---------------------------------------------------------------------|
| SOC1                                                                | AE1                           | score | AE2                                  | SOC2                                                                |
| Neoplasms benign, malignant and unspecified (incl cysts and polyps) | Tumour necrosis               | 1     | Factor V deficiency                  | Congenital, familial and genetic disorders                          |
| Vascular disorders                                                  | Embolism venous               | 1     | Cardiac failure chronic              | Cardiac disorders                                                   |
| Congenital, familial and genetic disorders                          | Inborn error of metabolism    | 1     | Joint destruction                    | Musculoskeletal and connective tissue disorders                     |
| Endocrine disorders                                                 | Oestrogen deficiency          | 1     | Lip haemorrhage                      | Gastrointestinal disorders                                          |
| Investigations                                                      | Blood zinc increased          | 1     | Blood copper decreased               | Investigations                                                      |
| Investigations                                                      | Troponin increased            | 1     | Pneumonia viral                      | Infections and infestations                                         |
| Nervous system disorders                                            | Locked-in syndrome            | 1     | Microangiopathy                      | Vascular disorders                                                  |
| Neoplasms benign, malignant and unspecified (incl cysts and polyps) | Parathyroid tumour            | 1     | Ulnar nerve injury                   | Injury, poisoning and procedural complications                      |
| Musculoskeletal and connective tissue disorders                     | Nose deformity                | 1     | Cerebral haemorrhage foetal          | Nervous system disorders                                            |
| Endocrine disorders                                                 | Parathyroid gland enlargement | 1     | Parathyroid tumour benign            | Neoplasms benign, malignant and unspecified (incl cysts and polyps) |
| Infections and infestations                                         | Listeriosis                   | 1     | Blood growth hormone abnormal        | Investigations                                                      |
| Injury, poisoning and procedural complications                      | Stress fracture               | 1     | B-cell lymphoma                      | Neoplasms benign, malignant and unspecified (incl cysts and polyps) |
| Investigations                                                      | Occult blood                  | 1     | Podagra                              | Metabolism and nutrition disorders                                  |
| Renal and urinary disorders                                         | Urinary tract pain            | 1     | Toxic induced encephalopathy         | Nervous system disorders                                            |
| Respiratory, thoracic and mediastinal disorders                     | Kussmaul respiration          | 1     | Occult blood                         | Investigations                                                      |
| Congenital, familial and genetic disorders                          | Congenital cerebral cyst      | 1     | Microtia                             | Congenital, familial and genetic disorders                          |
| Eye disorders                                                       | Madarosis                     | 1     | Intervertebral disc space narrowing  | Musculoskeletal and connective tissue disorders                     |
| Nervous system disorders                                            | Locked-in syndrome            | 1     | Cardiomyopathy neonatal              | Cardiac disorders                                                   |
| Congenital, familial and genetic disorders                          | Congenital joint malformation | 1     | Acquired tracheo-oesophageal fistula | Respiratory, thoracic and mediastinal disorders                     |
| Reproductive system and breast disorders                            | Ovarian enlargement           | 1     | Blood oestrogen decreased            | Investigations                                                      |

| Basis data for network                                              |                                        |       |                                 |                                                                     |
|---------------------------------------------------------------------|----------------------------------------|-------|---------------------------------|---------------------------------------------------------------------|
| SOC1                                                                | AE1                                    | score | AE2                             | SOC2                                                                |
| Nervous system disorders                                            | Glossopharyngeal nerve paralysis       | 1     | Atonic urinary bladder          | Renal and urinary disorders                                         |
| Infections and infestations                                         | Neonatal pneumonia                     | 1     | Neonatal infection              | Infections and infestations                                         |
| Hepatobiliary disorders                                             | Hepatic vein occlusion                 | 1     | Oropharyngeal spasm             | Respiratory, thoracic and mediastinal disorders                     |
| Cardiac disorders                                                   | Endocardial disease                    | 1     | Anti-platelet antibody positive | Investigations                                                      |
| Investigations                                                      | Vital capacity decreased               | 1     | Pleuropericarditis              | Cardiac disorders                                                   |
| Gastrointestinal disorders                                          | Rectal polyp                           | 1     | Listeriosis                     | Infections and infestations                                         |
| General disorders and administration site conditions                | Implant expulsion                      | 1     | Rectal polyp                    | Gastrointestinal disorders                                          |
| Gastrointestinal disorders                                          | Pancreatic pseudocyst                  | 1     | Microangiopathy                 | Vascular disorders                                                  |
| Investigations                                                      | White blood cell count                 | 1     | Bacterial sepsis                | Infections and infestations                                         |
| Nervous system disorders                                            | Lumbosacral plexus lesion              | 1     | Hypocalciuria                   | Renal and urinary disorders                                         |
| Respiratory, thoracic and mediastinal disorders                     | Laryngeal obstruction                  | 1     | Chorioretinopathy               | Eye disorders                                                       |
| Cardiac disorders                                                   | Endocardial disease                    | 1     | Adrenal haemorrhage             | Endocrine disorders                                                 |
| Gastrointestinal disorders                                          | Food poisoning                         | 1     | Submandibular mass              | General disorders and administration site conditions                |
| Investigations                                                      | Coagulation factor XII level increased | 1     | Plasminogen increased           | Investigations                                                      |
| Neoplasms benign, malignant and unspecified (incl cysts and polyps) | Malignant melanoma in situ             | 1     | Aneurysm ruptured               | Vascular disorders                                                  |
| Vascular disorders                                                  | Arterial haemorrhage                   | 1     | Acute prerenal failure          | Renal and urinary disorders                                         |
| Gastrointestinal disorders                                          | Pancreatic pseudocyst                  | 1     | Cardiomyopathy neonatal         | Cardiac disorders                                                   |
| Eye disorders                                                       | Retinal deposits                       | 1     | Hyperproteinaemia               | Metabolism and nutrition disorders                                  |
| Eye disorders                                                       | Phosphenes                             | 1     | Pituitary tumour                | Neoplasms benign, malignant and unspecified (incl cysts and polyps) |
| Infections and infestations                                         | Onchocerciasis                         | 1     | Lymph node pain                 | Blood and lymphatic system disorders                                |

| Basis data for network                                              |                                 |         |                                       |                                                                     |
|---------------------------------------------------------------------|---------------------------------|---------|---------------------------------------|---------------------------------------------------------------------|
| SOC1                                                                | AE1                             | score   | AE2                                   | SOC2                                                                |
| Pregnancy, puerperium and perinatal conditions                      | Retained placenta or membranes  | 1       | Congenital multiplex arthrogryposis   | Congenital, familial and genetic disorders                          |
| Respiratory, thoracic and mediastinal disorders                     | Mendelson's syndrome            | 1       | Glycosylated haemoglobin decreased    | Investigations                                                      |
| Neoplasms benign, malignant and unspecified (incl cysts and polyps) | Bronchioloalveolar carcinoma    | 1       | Pleuropericarditis                    | Cardiac disorders                                                   |
| Respiratory, thoracic and mediastinal disorders                     | Hypopnoea                       | 1       | Sleep attacks                         | Psychiatric disorders                                               |
| Investigations                                                      | Glucose tolerance test abnormal | 1       | Metastases to lung                    | Neoplasms benign, malignant and unspecified (incl cysts and polyps) |
| Congenital, familial and genetic disorders                          | Microtia                        | 1       | Congenital multiplex arthrogryposis   | Congenital, familial and genetic disorders                          |
| Neoplasms benign, malignant and unspecified (incl cysts and polyps) | Neurofibroma                    | 1       | Polymorphic light eruption            | Skin and subcutaneous tissue disorders                              |
| Congenital, familial and genetic disorders                          | Alkaptonuria                    | 1       | Kussmaul respiration                  | Respiratory, thoracic and mediastinal disorders                     |
| General disorders and administration site conditions                | Implant expulsion               | 1       | Throat cancer                         | Neoplasms benign, malignant and unspecified (incl cysts and polyps) |
| Investigations                                                      | Capillary fragility increased   | 1       | Oestrogen deficiency                  | Endocrine disorders                                                 |
| Investigations                                                      | Ceruloplasmin increased         | 1       | Adenosquamous carcinoma of the cervix | Neoplasms benign, malignant and unspecified (incl cysts and polyps) |
| Musculoskeletal and connective tissue disorders                     | Myopathy steroid                | 0.99948 | Alkalosis hypokalaemic                | Metabolism and nutrition disorders                                  |
| Injury, poisoning and procedural complications                      | Gastrointestinal injury         | 0.99934 | Calciophylaxis                        | Metabolism and nutrition disorders                                  |
| Reproductive system and breast disorders                            | Teratospermia                   | 0.99934 | Gastrointestinal injury               | Injury, poisoning and procedural complications                      |
| Metabolism and nutrition disorders                                  | Alkalosis hypokalaemic          | 0.99456 | Fat atrophy                           | Skin and subcutaneous tissue disorders                              |
| Nervous system disorders                                            | Meige's syndrome                | 0.99390 | Intestinal dilatation                 | Gastrointestinal disorders                                          |
| Gastrointestinal disorders                                          | Intestinal dilatation           | 0.99390 | Antiphospholipid syndrome             | Immune system disorders                                             |
| Skin and subcutaneous tissue disorders                              | Fat atrophy                     | 0.99368 | Myopathy steroid                      | Musculoskeletal and connective tissue disorders                     |
| Investigations                                                      | Platelet function test abnormal | 0.99085 | Vitamin K deficiency                  | Metabolism and nutrition disorders                                  |
| Injury, poisoning and procedural complications                      | Tendon injury                   | 0.99078 | Catabolic state                       | Metabolism and nutrition disorders                                  |

| Basis data for network                          |                                 |         |                          |                                                      |
|-------------------------------------------------|---------------------------------|---------|--------------------------|------------------------------------------------------|
| SOC1                                            | AE1                             | score   | AE2                      | SOC2                                                 |
| Eye disorders                                   | Chorioretinopathy               | 0.99078 | Catabolic state          | Metabolism and nutrition disorders                   |
| Musculoskeletal and connective tissue disorders | Scoliosis                       | 0.99078 | Catabolic state          | Metabolism and nutrition disorders                   |
| Metabolism and nutrition disorders              | Catabolic state                 | 0.99078 | Nasal mucosa atrophy     | Respiratory, thoracic and mediastinal disorders      |
| Metabolism and nutrition disorders              | Catabolic state                 | 0.99078 | Blood chromium decreased | Investigations                                       |
| Metabolism and nutrition disorders              | Catabolic state                 | 0.99078 | Scleromalacia            | Eye disorders                                        |
| Eye disorders                                   | Posterior capsule opacification | 0.99078 | Catabolic state          | Metabolism and nutrition disorders                   |
| Respiratory, thoracic and mediastinal disorders | Laryngeal obstruction           | 0.99078 | Catabolic state          | Metabolism and nutrition disorders                   |
| Congenital, familial and genetic disorders      | Cerebral palsy                  | 0.98928 | Coarctation of the aorta | Congenital, familial and genetic disorders           |
| Congenital, familial and genetic disorders      | Coarctation of the aorta        | 0.98928 | Talipes                  | Congenital, familial and genetic disorders           |
| Investigations                                  | Androgens increased             | 0.98928 | Cerebral atrophy         | Nervous system disorders                             |
| Nervous system disorders                        | Cerebral atrophy                | 0.98928 | Talipes                  | Congenital, familial and genetic disorders           |
| Congenital, familial and genetic disorders      | Clinodactyly                    | 0.98928 | Porencephaly             | Congenital, familial and genetic disorders           |
| Nervous system disorders                        | Cerebral atrophy                | 0.98928 | Clinodactyly             | Congenital, familial and genetic disorders           |
| Nervous system disorders                        | Cerebral atrophy                | 0.98928 | Pseudocyst               | General disorders and administration site conditions |
| Gastrointestinal disorders                      | Pancreatic necrosis             | 0.98928 | Cerebral atrophy         | Nervous system disorders                             |
| Blood and lymphatic system disorders            | Acquired afibrinogenaemia       | 0.98928 | Cerebral atrophy         | Nervous system disorders                             |
| Congenital, familial and genetic disorders      | Coarctation of the aorta        | 0.98928 | Clinodactyly             | Congenital, familial and genetic disorders           |
| Nervous system disorders                        | Neurodegenerative disorder      | 0.98928 | Porencephaly             | Congenital, familial and genetic disorders           |
| Congenital, familial and genetic disorders      | Coarctation of the aorta        | 0.98928 | Androgens increased      | Investigations                                       |
| Blood and lymphatic system disorders            | Acquired afibrinogenaemia       | 0.98928 | Porencephaly             | Congenital, familial and genetic disorders           |

| Basis data for network                               |                                      |         |                                      |                                            |
|------------------------------------------------------|--------------------------------------|---------|--------------------------------------|--------------------------------------------|
| SOC1                                                 | AE1                                  | score   | AE2                                  | SOC2                                       |
| Metabolism and nutrition disorders                   | Hyperhomocysteinaemia                | 0.98928 | Porencephaly                         | Congenital, familial and genetic disorders |
| Investigations                                       | Androgens increased                  | 0.98928 | Porencephaly                         | Congenital, familial and genetic disorders |
| General disorders and administration site conditions | Pseudocyst                           | 0.98928 | Coarctation of the aorta             | Congenital, familial and genetic disorders |
| Congenital, familial and genetic disorders           | Talipes                              | 0.98928 | Porencephaly                         | Congenital, familial and genetic disorders |
| Congenital, familial and genetic disorders           | Cerebral palsy                       | 0.98928 | Porencephaly                         | Congenital, familial and genetic disorders |
| Nervous system disorders                             | Neurodegenerative disorder           | 0.98928 | Coarctation of the aorta             | Congenital, familial and genetic disorders |
| Gastrointestinal disorders                           | Pancreatic necrosis                  | 0.98928 | Coarctation of the aorta             | Congenital, familial and genetic disorders |
| Congenital, familial and genetic disorders           | Porencephaly                         | 0.98928 | Abulia                               | Psychiatric disorders                      |
| Metabolism and nutrition disorders                   | Hyperhomocysteinaemia                | 0.98928 | Cerebral atrophy                     | Nervous system disorders                   |
| Nervous system disorders                             | Cerebral atrophy                     | 0.98928 | Neurodegenerative disorder           | Nervous system disorders                   |
| Congenital, familial and genetic disorders           | Porencephaly                         | 0.98928 | Pancreatic necrosis                  | Gastrointestinal disorders                 |
| Nervous system disorders                             | Cerebral atrophy                     | 0.98928 | Abulia                               | Psychiatric disorders                      |
| Metabolism and nutrition disorders                   | Hyperhomocysteinaemia                | 0.98928 | Coarctation of the aorta             | Congenital, familial and genetic disorders |
| General disorders and administration site conditions | Pseudocyst                           | 0.98928 | Porencephaly                         | Congenital, familial and genetic disorders |
| Nervous system disorders                             | Cerebral atrophy                     | 0.98928 | Cerebral palsy                       | Congenital, familial and genetic disorders |
| Congenital, familial and genetic disorders           | Coarctation of the aorta             | 0.98928 | Abulia                               | Psychiatric disorders                      |
| Congenital, familial and genetic disorders           | Coarctation of the aorta             | 0.98928 | Acquired afibrinogenaemia            | Blood and lymphatic system disorders       |
| Investigations                                       | Blood antidiuretic hormone increased | 0.98919 | Antiphospholipid syndrome            | Immune system disorders                    |
| Nervous system disorders                             | Meige's syndrome                     | 0.98919 | Blood antidiuretic hormone increased | Investigations                             |
| Congenital, familial and genetic disorders           | Muscular dystrophy                   | 0.98875 | Dacryostenosis acquired              | Eye disorders                              |

| Basis data for network                                              |                            |         |                              |                                                                     |
|---------------------------------------------------------------------|----------------------------|---------|------------------------------|---------------------------------------------------------------------|
| SOC1                                                                | AE1                        | score   | AE2                          | SOC2                                                                |
| Eye disorders                                                       | Dacryostenosis acquired    | 0.98875 | Congenital iris anomaly      | Congenital, familial and genetic disorders                          |
| Neoplasms benign, malignant and unspecified (incl cysts and polyps) | Bronchial neoplasm         | 0.98827 | Cerebral arteritis           | Nervous system disorders                                            |
| Nervous system disorders                                            | Cerebral arteritis         | 0.98827 | Bronchioloalveolar carcinoma | Neoplasms benign, malignant and unspecified (incl cysts and polyps) |
| Investigations                                                      | Vital capacity decreased   | 0.98827 | Cerebral arteritis           | Nervous system disorders                                            |
| Cardiac disorders                                                   | Pleuropericarditis         | 0.98827 | Cerebral arteritis           | Nervous system disorders                                            |
| Nervous system disorders                                            | Meige's syndrome           | 0.98775 | Dyskinesia oesophageal       | Gastrointestinal disorders                                          |
| Immune system disorders                                             | Antiphospholipid syndrome  | 0.98775 | Dyskinesia oesophageal       | Gastrointestinal disorders                                          |
| General disorders and administration site conditions                | Injection site nodule      | 0.98766 | Antiphospholipid syndrome    | Immune system disorders                                             |
| General disorders and administration site conditions                | Injection site nodule      | 0.98766 | Meige's syndrome             | Nervous system disorders                                            |
| Reproductive system and breast disorders                            | Polycystic ovaries         | 0.98741 | Cerebral atrophy             | Nervous system disorders                                            |
| Reproductive system and breast disorders                            | Polycystic ovaries         | 0.98741 | Coarctation of the aorta     | Congenital, familial and genetic disorders                          |
| Congenital, familial and genetic disorders                          | Porencephaly               | 0.98741 | Polycystic ovaries           | Reproductive system and breast disorders                            |
| General disorders and administration site conditions                | Bloody discharge           | 0.98712 | Genital erythema             | Reproductive system and breast disorders                            |
| Reproductive system and breast disorders                            | Genital erythema           | 0.98712 | Nonspecific reaction         | General disorders and administration site conditions                |
| Metabolism and nutrition disorders                                  | Hyperhomocysteinaemia      | 0.98682 | Polycystic ovaries           | Reproductive system and breast disorders                            |
| Nervous system disorders                                            | Neurodegenerative disorder | 0.98682 | Polycystic ovaries           | Reproductive system and breast disorders                            |
| Investigations                                                      | Androgens increased        | 0.98682 | Polycystic ovaries           | Reproductive system and breast disorders                            |
| Congenital, familial and genetic disorders                          | Cerebral palsy             | 0.98682 | Polycystic ovaries           | Reproductive system and breast disorders                            |
| Reproductive system and breast disorders                            | Polycystic ovaries         | 0.98682 | Pseudocyst                   | General disorders and administration site conditions                |
| Reproductive system and breast disorders                            | Polycystic ovaries         | 0.98682 | Clinodactyly                 | Congenital, familial and genetic disorders                          |

| Basis data for network                               |                              |         |                                 |                                                      |
|------------------------------------------------------|------------------------------|---------|---------------------------------|------------------------------------------------------|
| SOC1                                                 | AE1                          | score   | AE2                             | SOC2                                                 |
| Blood and lymphatic system disorders                 | Acquired afibrinogenaemia    | 0.98682 | Polycystic ovaries              | Reproductive system and breast disorders             |
| Reproductive system and breast disorders             | Polycystic ovaries           | 0.98682 | Pancreatic necrosis             | Gastrointestinal disorders                           |
| Psychiatric disorders                                | Abulia                       | 0.98682 | Polycystic ovaries              | Reproductive system and breast disorders             |
| Congenital, familial and genetic disorders           | Talipes                      | 0.98682 | Polycystic ovaries              | Reproductive system and breast disorders             |
| Injury, poisoning and procedural complications       | Spinal compression fracture  | 0.98565 | Alkalosis hypokalaemic          | Metabolism and nutrition disorders                   |
| Reproductive system and breast disorders             | Teratospermia                | 0.98564 | Injection site extravasation    | General disorders and administration site conditions |
| Metabolism and nutrition disorders                   | Calciphylaxis                | 0.98564 | Injection site extravasation    | General disorders and administration site conditions |
| Injury, poisoning and procedural complications       | Spinal compression fracture  | 0.98492 | Myopathy steroid                | Musculoskeletal and connective tissue disorders      |
| General disorders and administration site conditions | Injection site extravasation | 0.98492 | Gastrointestinal injury         | Injury, poisoning and procedural complications       |
| Nervous system disorders                             | Cerebellar artery occlusion  | 0.98478 | Splenic artery aneurysm         | Gastrointestinal disorders                           |
| Nervous system disorders                             | Cerebellar artery occlusion  | 0.98478 | Rectal stenosis                 | Gastrointestinal disorders                           |
| Injury, poisoning and procedural complications       | Spinal fracture              | 0.98462 | Posterior capsule opacification | Eye disorders                                        |
| Eye disorders                                        | Scleromalacia                | 0.98462 | Spinal fracture                 | Injury, poisoning and procedural complications       |
| Injury, poisoning and procedural complications       | Spinal fracture              | 0.98462 | Laryngeal obstruction           | Respiratory, thoracic and mediastinal disorders      |
| Injury, poisoning and procedural complications       | Spinal fracture              | 0.98462 | Nasal mucosa atrophy            | Respiratory, thoracic and mediastinal disorders      |
| Investigations                                       | Blood chromium decreased     | 0.98462 | Spinal fracture                 | Injury, poisoning and procedural complications       |
| Eye disorders                                        | Chorioretinopathy            | 0.98462 | Spinal fracture                 | Injury, poisoning and procedural complications       |
| Injury, poisoning and procedural complications       | Tendon injury                | 0.98462 | Spinal fracture                 | Injury, poisoning and procedural complications       |
| Injury, poisoning and procedural complications       | Spinal fracture              | 0.98462 | Scoliosis                       | Musculoskeletal and connective tissue disorders      |
| Reproductive system and breast disorders             | Aspermia                     | 0.98457 | Meige's syndrome                | Nervous system disorders                             |

| Basis data for network                               |                                        |         |                                        |                                                 |
|------------------------------------------------------|----------------------------------------|---------|----------------------------------------|-------------------------------------------------|
| SOC1                                                 | AE1                                    | score   | AE2                                    | SOC2                                            |
| Reproductive system and breast disorders             | Aspermia                               | 0.98457 | Antiphospholipid syndrome              | Immune system disorders                         |
| Infections and infestations                          | Corneal infection                      | 0.98388 | Nasal mucosa atrophy                   | Respiratory, thoracic and mediastinal disorders |
| Respiratory, thoracic and mediastinal disorders      | Laryngeal obstruction                  | 0.98388 | Corneal infection                      | Infections and infestations                     |
| Musculoskeletal and connective tissue disorders      | Scoliosis                              | 0.98388 | Corneal infection                      | Infections and infestations                     |
| Injury, poisoning and procedural complications       | Tendon injury                          | 0.98388 | Corneal infection                      | Infections and infestations                     |
| Infections and infestations                          | Corneal infection                      | 0.98388 | Chorioretinopathy                      | Eye disorders                                   |
| Eye disorders                                        | Scleromalacia                          | 0.98388 | Corneal infection                      | Infections and infestations                     |
| Infections and infestations                          | Corneal infection                      | 0.98388 | Blood chromium decreased               | Investigations                                  |
| Infections and infestations                          | Corneal infection                      | 0.98388 | Posterior capsule opacification        | Eye disorders                                   |
| General disorders and administration site conditions | Exercise tolerance decreased           | 0.98289 | Glare                                  | Eye disorders                                   |
| General disorders and administration site conditions | Exercise tolerance decreased           | 0.98289 | Conjunctival cyst                      | Eye disorders                                   |
| Gastrointestinal disorders                           | Intestinal dilatation                  | 0.98285 | Blood antidiuretic hormone increased   | Investigations                                  |
| Gastrointestinal disorders                           | Dyskinesia oesophageal                 | 0.98150 | Intestinal dilatation                  | Gastrointestinal disorders                      |
| General disorders and administration site conditions | Injection site nodule                  | 0.98150 | Intestinal dilatation                  | Gastrointestinal disorders                      |
| Injury, poisoning and procedural complications       | Spinal compression fracture            | 0.98073 | Fat atrophy                            | Skin and subcutaneous tissue disorders          |
| Endocrine disorders                                  | Secondary adrenocortical insufficiency | 0.97981 | Myopathy steroid                       | Musculoskeletal and connective tissue disorders |
| Metabolism and nutrition disorders                   | Alkalosis hypokalaemic                 | 0.97972 | Secondary adrenocortical insufficiency | Endocrine disorders                             |
| Gastrointestinal disorders                           | Intestinal dilatation                  | 0.97918 | Aspermia                               | Reproductive system and breast disorders        |
| Injury, poisoning and procedural complications       | Uterine rupture                        | 0.97916 | Uterine hypertonus                     | Pregnancy, puerperium and perinatal conditions  |
| Pregnancy, puerperium and perinatal conditions       | Uterine hypertonus                     | 0.97916 | Uterine cervical laceration            | Reproductive system and breast disorders        |



| Basis data for network                         |                                        |         |                                      |                                                      |
|------------------------------------------------|----------------------------------------|---------|--------------------------------------|------------------------------------------------------|
| SOC1                                           | AE1                                    | score   | AE2                                  | SOC2                                                 |
| Eye disorders                                  | Growth of eyelashes                    | 0.97916 | Uterine hypertonus                   | Pregnancy, puerperium and perinatal conditions       |
| Eye disorders                                  | Iris hyperpigmentation                 | 0.97900 | Uterine cervical laceration          | Reproductive system and breast disorders             |
| Eye disorders                                  | Iris hyperpigmentation                 | 0.97900 | Growth of eyelashes                  | Eye disorders                                        |
| Eye disorders                                  | Iris hyperpigmentation                 | 0.97900 | Uterine rupture                      | Injury, poisoning and procedural complications       |
| Congenital, familial and genetic disorders     | Holoprosencephaly                      | 0.97846 | Congenital cerebral cyst             | Congenital, familial and genetic disorders           |
| Pregnancy, puerperium and perinatal conditions | Postpartum haemorrhage                 | 0.97846 | Holoprosencephaly                    | Congenital, familial and genetic disorders           |
| Congenital, familial and genetic disorders     | Holoprosencephaly                      | 0.97846 | Retained placenta or membranes       | Pregnancy, puerperium and perinatal conditions       |
| Nervous system disorders                       | Foetal cerebrovascular disorder        | 0.97846 | Holoprosencephaly                    | Congenital, familial and genetic disorders           |
| Congenital, familial and genetic disorders     | Holoprosencephaly                      | 0.97846 | Congenital bladder anomaly           | Congenital, familial and genetic disorders           |
| Congenital, familial and genetic disorders     | Holoprosencephaly                      | 0.97846 | Microtia                             | Congenital, familial and genetic disorders           |
| Congenital, familial and genetic disorders     | Congenital multiplex arthrogryposis    | 0.97846 | Holoprosencephaly                    | Congenital, familial and genetic disorders           |
| Congenital, familial and genetic disorders     | Holoprosencephaly                      | 0.97846 | Congenital hydrocephalus             | Congenital, familial and genetic disorders           |
| Congenital, familial and genetic disorders     | Moebius II syndrome                    | 0.97846 | Holoprosencephaly                    | Congenital, familial and genetic disorders           |
| Gastrointestinal disorders                     | Dyskinesia oesophageal                 | 0.97659 | Injection site nodule                | General disorders and administration site conditions |
| Gastrointestinal disorders                     | Dyskinesia oesophageal                 | 0.97655 | Blood antidiuretic hormone increased | Investigations                                       |
| Investigations                                 | Blood antidiuretic hormone increased   | 0.97633 | Injection site nodule                | General disorders and administration site conditions |
| Endocrine disorders                            | Adrenocortical insufficiency acute     | 0.97602 | Fat atrophy                          | Skin and subcutaneous tissue disorders               |
| Endocrine disorders                            | Secondary adrenocortical insufficiency | 0.97543 | Fat atrophy                          | Skin and subcutaneous tissue disorders               |
| Metabolism and nutrition disorders             | Catabolic state                        | 0.97521 | Spinal fracture                      | Injury, poisoning and procedural complications       |
| Reproductive system and breast disorders       | Aspermia                               | 0.97506 | Dyskinesia oesophageal               | Gastrointestinal disorders                           |

| Basis data for network                                              |                                      |         |                                  |                                                      |
|---------------------------------------------------------------------|--------------------------------------|---------|----------------------------------|------------------------------------------------------|
| SOC1                                                                | AE1                                  | score   | AE2                              | SOC2                                                 |
| Cardiac disorders                                                   | Myocardial rupture                   | 0.97503 | Neuropathic arthropathy          | Musculoskeletal and connective tissue disorders      |
| Neoplasms benign, malignant and unspecified (incl cysts and polyps) | Focal nodular hyperplasia            | 0.97447 | Nodular regenerative hyperplasia | Hepatobiliary disorders                              |
| Metabolism and nutrition disorders                                  | Catabolic state                      | 0.97444 | Corneal infection                | Infections and infestations                          |
| Nervous system disorders                                            | Peripheral nerve palsy               | 0.97433 | Facial paresis                   | Nervous system disorders                             |
| Investigations                                                      | Blood antidiuretic hormone increased | 0.97408 | Aspermia                         | Reproductive system and breast disorders             |
| Nervous system disorders                                            | Nerve degeneration                   | 0.97366 | Autonomic neuropathy             | Nervous system disorders                             |
| Reproductive system and breast disorders                            | Ovarian failure                      | 0.97341 | Teratospermia                    | Reproductive system and breast disorders             |
| Metabolism and nutrition disorders                                  | Calciophylaxis                       | 0.97341 | Ovarian failure                  | Reproductive system and breast disorders             |
| Endocrine disorders                                                 | Hypoaldosteronism                    | 0.97310 | Congenital spinal cord anomaly   | Congenital, familial and genetic disorders           |
| Nervous system disorders                                            | Meige's syndrome                     | 0.97292 | Pregnancy test false positive    | Investigations                                       |
| Investigations                                                      | Pregnancy test false positive        | 0.97292 | Antiphospholipid syndrome        | Immune system disorders                              |
| Renal and urinary disorders                                         | Bladder stenosis                     | 0.97278 | Pulmonary granuloma              | Respiratory, thoracic and mediastinal disorders      |
| Respiratory, thoracic and mediastinal disorders                     | Pulmonary granuloma                  | 0.97278 | Bile output decreased            | Investigations                                       |
| Reproductive system and breast disorders                            | Ovarian failure                      | 0.97265 | Gastrointestinal injury          | Injury, poisoning and procedural complications       |
| Psychiatric disorders                                               | Coprolalia                           | 0.97146 | Pylorospasm                      | Gastrointestinal disorders                           |
| Reproductive system and breast disorders                            | Aspermia                             | 0.97139 | Injection site nodule            | General disorders and administration site conditions |
| Nervous system disorders                                            | Cerebellar artery thrombosis         | 0.97099 | Dressler's syndrome              | Cardiac disorders                                    |
| Nervous system disorders                                            | Cerebellar artery thrombosis         | 0.97099 | Proctitis haemorrhagic           | Gastrointestinal disorders                           |
| Cardiac disorders                                                   | Grey syndrome neonatal               | 0.97070 | Scoliosis                        | Musculoskeletal and connective tissue disorders      |
| Respiratory, thoracic and mediastinal disorders                     | Laryngeal obstruction                | 0.97070 | Grey syndrome neonatal           | Cardiac disorders                                    |

| Basis data for network                          |                                 |         |                                    |                                                 |
|-------------------------------------------------|---------------------------------|---------|------------------------------------|-------------------------------------------------|
| SOC1                                            | AE1                             | score   | AE2                                | SOC2                                            |
| Cardiac disorders                               | Grey syndrome neonatal          | 0.97070 | Chorioretinopathy                  | Eye disorders                                   |
| Cardiac disorders                               | Grey syndrome neonatal          | 0.97070 | Nasal mucosa atrophy               | Respiratory, thoracic and mediastinal disorders |
| Cardiac disorders                               | Grey syndrome neonatal          | 0.97070 | Scleromalacia                      | Eye disorders                                   |
| Injury, poisoning and procedural complications  | Tendon injury                   | 0.97070 | Grey syndrome neonatal             | Cardiac disorders                               |
| Eye disorders                                   | Posterior capsule opacification | 0.97070 | Grey syndrome neonatal             | Cardiac disorders                               |
| Cardiac disorders                               | Grey syndrome neonatal          | 0.97070 | Blood chromium decreased           | Investigations                                  |
| Investigations                                  | PCO2 abnormal                   | 0.97035 | Heart sounds abnormal              | Investigations                                  |
| Investigations                                  | PCO2 abnormal                   | 0.97035 | Mean cell volume abnormal          | Investigations                                  |
| Reproductive system and breast disorders        | Retrograde ejaculation          | 0.96914 | Meige's syndrome                   | Nervous system disorders                        |
| Immune system disorders                         | Antiphospholipid syndrome       | 0.96914 | Retrograde ejaculation             | Reproductive system and breast disorders        |
| Nervous system disorders                        | Meige's syndrome                | 0.96807 | Sperm count increased              | Investigations                                  |
| Investigations                                  | Sperm count increased           | 0.96807 | Antiphospholipid syndrome          | Immune system disorders                         |
| Eye disorders                                   | Retinal ischaemia               | 0.96783 | Blood pressure systolic            | Investigations                                  |
| Infections and infestations                     | Corneal infection               | 0.96777 | Spinal fracture                    | Injury, poisoning and procedural complications  |
| Metabolism and nutrition disorders              | Alkalosis hypokalaemic          | 0.96739 | Adrenocortical insufficiency acute | Endocrine disorders                             |
| Congenital, familial and genetic disorders      | Tooth discolouration congenital | 0.96733 | Tooth hypoplasia                   | Congenital, familial and genetic disorders      |
| Congenital, familial and genetic disorders      | Tooth hypoplasia                | 0.96733 | Cataract congenital                | Congenital, familial and genetic disorders      |
| Musculoskeletal and connective tissue disorders | Extremity contracture           | 0.96707 | Pulmonary hypoplasia               | Congenital, familial and genetic disorders      |
| Musculoskeletal and connective tissue disorders | Extremity contracture           | 0.96707 | Neonatal hypotension               | Vascular disorders                              |
| Immune system disorders                         | Immune reconstitution syndrome  | 0.96661 | Facial wasting                     | Metabolism and nutrition disorders              |

| Basis data for network                               |                                 |         |                                     |                                                      |
|------------------------------------------------------|---------------------------------|---------|-------------------------------------|------------------------------------------------------|
| SOC1                                                 | AE1                             | score   | AE2                                 | SOC2                                                 |
| Investigations                                       | Pregnancy test false positive   | 0.96648 | Intestinal dilatation               | Gastrointestinal disorders                           |
| Blood and lymphatic system disorders                 | Pernicious anaemia              | 0.96629 | Pneumoperitoneum                    | Gastrointestinal disorders                           |
| Cardiac disorders                                    | Papillary muscle disorder       | 0.96629 | Pneumoperitoneum                    | Gastrointestinal disorders                           |
| Gastrointestinal disorders                           | Pneumoperitoneum                | 0.96629 | Thyroxine free decreased            | Investigations                                       |
| Gastrointestinal disorders                           | Pneumoperitoneum                | 0.96629 | Reverse tri-iodothyronine increased | Investigations                                       |
| Musculoskeletal and connective tissue disorders      | Myopathy steroid                | 0.96572 | Adrenocortical insufficiency acute  | Endocrine disorders                                  |
| Investigations                                       | Pregnancy test false positive   | 0.96533 | Aspermia                            | Reproductive system and breast disorders             |
| Nervous system disorders                             | Meige's syndrome                | 0.96526 | Facial spasm                        | Nervous system disorders                             |
| Immune system disorders                              | Antiphospholipid syndrome       | 0.96526 | Facial spasm                        | Nervous system disorders                             |
| Skin and subcutaneous tissue disorders               | Mucocutaneous rash              | 0.96519 | Salivary gland calculus             | Gastrointestinal disorders                           |
| Gastrointestinal disorders                           | Tooth deposit                   | 0.96519 | Mucocutaneous rash                  | Skin and subcutaneous tissue disorders               |
| Skin and subcutaneous tissue disorders               | Mucocutaneous rash              | 0.96519 | Tooth loss                          | Gastrointestinal disorders                           |
| Eye disorders                                        | Cataract subcapsular            | 0.96489 | Alkalosis hypokalaemic              | Metabolism and nutrition disorders                   |
| Reproductive system and breast disorders             | Vaginal swelling                | 0.96484 | Vulval oedema                       | Reproductive system and breast disorders             |
| Musculoskeletal and connective tissue disorders      | Myopathy steroid                | 0.96455 | Injection site abscess sterile      | General disorders and administration site conditions |
| Eye disorders                                        | Cataract subcapsular            | 0.96423 | Myopathy steroid                    | Musculoskeletal and connective tissue disorders      |
| Musculoskeletal and connective tissue disorders      | Myopathy steroid                | 0.96415 | Nitrogen balance negative           | Investigations                                       |
| General disorders and administration site conditions | Injection site hypersensitivity | 0.96362 | Allergic oedema                     | Immune system disorders                              |
| Immune system disorders                              | Allergic oedema                 | 0.96362 | Post thrombotic syndrome            | Vascular disorders                                   |
| Metabolism and nutrition disorders                   | Alkalosis hypokalaemic          | 0.96352 | Nitrogen balance negative           | Investigations                                       |

| Basis data for network                          |                                    |         |                                      |                                                 |
|-------------------------------------------------|------------------------------------|---------|--------------------------------------|-------------------------------------------------|
| SOC1                                            | AE1                                | score   | AE2                                  | SOC2                                            |
| Injury, poisoning and procedural complications  | Spinal compression fracture        | 0.96332 | Adrenocortical insufficiency acute   | Endocrine disorders                             |
| Immune system disorders                         | Antiphospholipid syndrome          | 0.96318 | Stereotypic movement disorder        | Psychiatric disorders                           |
| Nervous system disorders                        | Meige's syndrome                   | 0.96318 | Stereotypic movement disorder        | Psychiatric disorders                           |
| Investigations                                  | Liver function test                | 0.96313 | Antiphospholipid syndrome            | Immune system disorders                         |
| Investigations                                  | Liver function test                | 0.96313 | Meige's syndrome                     | Nervous system disorders                        |
| Eye disorders                                   | Cataract subcapsular               | 0.96313 | Fat atrophy                          | Skin and subcutaneous tissue disorders          |
| Endocrine disorders                             | Adrenocortical insufficiency acute | 0.96309 | Blood chromium decreased             | Investigations                                  |
| Endocrine disorders                             | Adrenocortical insufficiency acute | 0.96309 | Scoliosis                            | Musculoskeletal and connective tissue disorders |
| Endocrine disorders                             | Adrenocortical insufficiency acute | 0.96309 | Laryngeal obstruction                | Respiratory, thoracic and mediastinal disorders |
| Respiratory, thoracic and mediastinal disorders | Nasal mucosa atrophy               | 0.96309 | Adrenocortical insufficiency acute   | Endocrine disorders                             |
| Endocrine disorders                             | Adrenocortical insufficiency acute | 0.96309 | Scleromalacia                        | Eye disorders                                   |
| Eye disorders                                   | Chorioretinopathy                  | 0.96309 | Adrenocortical insufficiency acute   | Endocrine disorders                             |
| Eye disorders                                   | Posterior capsule opacification    | 0.96309 | Adrenocortical insufficiency acute   | Endocrine disorders                             |
| Injury, poisoning and procedural complications  | Tendon injury                      | 0.96309 | Adrenocortical insufficiency acute   | Endocrine disorders                             |
| Gastrointestinal disorders                      | Gastrointestinal ischaemia         | 0.96289 | Splenic artery aneurysm              | Gastrointestinal disorders                      |
| Gastrointestinal disorders                      | Rectal stenosis                    | 0.96289 | Gastrointestinal ischaemia           | Gastrointestinal disorders                      |
| Reproductive system and breast disorders        | Retrograde ejaculation             | 0.96285 | Intestinal dilatation                | Gastrointestinal disorders                      |
| Nervous system disorders                        | Meige's syndrome                   | 0.96261 | Limb reduction defect                | Congenital, familial and genetic disorders      |
| Congenital, familial and genetic disorders      | Limb reduction defect              | 0.96261 | Antiphospholipid syndrome            | Immune system disorders                         |
| Investigations                                  | Pregnancy test false positive      | 0.96251 | Blood antidiuretic hormone increased | Investigations                                  |

| Basis data for network                               |                                    |         |                                        |                                                      |
|------------------------------------------------------|------------------------------------|---------|----------------------------------------|------------------------------------------------------|
| SOC1                                                 | AE1                                | score   | AE2                                    | SOC2                                                 |
| Investigations                                       | Megaloblasts increased             | 0.96206 | Ephelides                              | Skin and subcutaneous tissue disorders               |
| Gastrointestinal disorders                           | Pylorospasm                        | 0.96168 | Acoustic stimulation tests abnormal    | Investigations                                       |
| Injury, poisoning and procedural complications       | Spinal compression fracture        | 0.96144 | Secondary adrenocortical insufficiency | Endocrine disorders                                  |
| Investigations                                       | Sperm count increased              | 0.96133 | Intestinal dilatation                  | Gastrointestinal disorders                           |
| Cardiac disorders                                    | Grey syndrome neonatal             | 0.96107 | Catabolic state                        | Metabolism and nutrition disorders                   |
| Psychiatric disorders                                | Phobia of driving                  | 0.96100 | Clumsiness                             | Nervous system disorders                             |
| Endocrine disorders                                  | Adrenocortical insufficiency acute | 0.96093 | Spinal fracture                        | Injury, poisoning and procedural complications       |
| Metabolism and nutrition disorders                   | Alkalosis hypokalaemic             | 0.96085 | Injection site abscess sterile         | General disorders and administration site conditions |
| Gastrointestinal disorders                           | Dyskinesia oesophageal             | 0.96055 | Pregnancy test false positive          | Investigations                                       |
| Vascular disorders                                   | Arterial stenosis                  | 0.95997 | Splenic artery aneurysm                | Gastrointestinal disorders                           |
| Vascular disorders                                   | Arterial stenosis                  | 0.95997 | Rectal stenosis                        | Gastrointestinal disorders                           |
| Investigations                                       | Bile output decreased              | 0.95995 | Blood corticotrophin decreased         | Investigations                                       |
| Investigations                                       | Blood corticotrophin decreased     | 0.95995 | Bladder stenosis                       | Renal and urinary disorders                          |
| Nervous system disorders                             | Meige's syndrome                   | 0.95992 | Blood growth hormone increased         | Investigations                                       |
| Immune system disorders                              | Antiphospholipid syndrome          | 0.95992 | Blood growth hormone increased         | Investigations                                       |
| General disorders and administration site conditions | Injection site nodule              | 0.95968 | Pregnancy test false positive          | Investigations                                       |
| Investigations                                       | Urine chloride decreased           | 0.95958 | Glomerular filtration rate             | Investigations                                       |
| Investigations                                       | Urine osmolarity                   | 0.95958 | Urine chloride decreased               | Investigations                                       |
| Reproductive system and breast disorders             | Retrograde ejaculation             | 0.95929 | Blood antidiuretic hormone increased   | Investigations                                       |
| Reproductive system and breast disorders             | Genital erythema                   | 0.95867 | Perianal erythema                      | Gastrointestinal disorders                           |

| Basis data for network                               |                                      |         |                              |                                                      |
|------------------------------------------------------|--------------------------------------|---------|------------------------------|------------------------------------------------------|
| SOC1                                                 | AE1                                  | score   | AE2                          | SOC2                                                 |
| Reproductive system and breast disorders             | Ovarian failure                      | 0.95843 | Injection site extravasation | General disorders and administration site conditions |
| Nervous system disorders                             | Facial spasm                         | 0.95829 | Intestinal dilatation        | Gastrointestinal disorders                           |
| Psychiatric disorders                                | Stereotypic movement disorder        | 0.95796 | Intestinal dilatation        | Gastrointestinal disorders                           |
| General disorders and administration site conditions | Application site discomfort          | 0.95792 | Retinoic acid syndrome       | Respiratory, thoracic and mediastinal disorders      |
| Respiratory, thoracic and mediastinal disorders      | Lower respiratory tract inflammation | 0.95792 | Application site discomfort  | General disorders and administration site conditions |
| General disorders and administration site conditions | Application site discomfort          | 0.95792 | White blood cells urine      | Investigations                                       |
| Skin and subcutaneous tissue disorders               | Acne fulminans                       | 0.95792 | Application site discomfort  | General disorders and administration site conditions |
| General disorders and administration site conditions | Application site discomfort          | 0.95792 | Tendon calcification         | Musculoskeletal and connective tissue disorders      |
| Congenital, familial and genetic disorders           | Congenital great vessel anomaly      | 0.95792 | Application site discomfort  | General disorders and administration site conditions |
| General disorders and administration site conditions | Application site discomfort          | 0.95792 | Scrotal ulcer                | Reproductive system and breast disorders             |
| General disorders and administration site conditions | Application site discomfort          | 0.95792 | Thymus hypoplasia            | Congenital, familial and genetic disorders           |
| General disorders and administration site conditions | Application site discomfort          | 0.95792 | Hypertelorism of orbit       | Congenital, familial and genetic disorders           |
| General disorders and administration site conditions | Application site discomfort          | 0.95792 | Asthma exercise induced      | Respiratory, thoracic and mediastinal disorders      |
| Congenital, familial and genetic disorders           | Optic nerve hypoplasia               | 0.95792 | Application site discomfort  | General disorders and administration site conditions |
| Injury, poisoning and procedural complications       | Spinal fracture                      | 0.95767 | Grey syndrome neonatal       | Cardiac disorders                                    |
| Investigations                                       | Blood antidiuretic hormone increased | 0.95746 | Facial spasm                 | Nervous system disorders                             |
| Musculoskeletal and connective tissue disorders      | Myopathy steroid                     | 0.95735 | Skin fragility               | Skin and subcutaneous tissue disorders               |
| Respiratory, thoracic and mediastinal disorders      | Laryngeal disorder                   | 0.95727 | Antiphospholipid syndrome    | Immune system disorders                              |
| Respiratory, thoracic and mediastinal disorders      | Laryngeal disorder                   | 0.95727 | Meige's syndrome             | Nervous system disorders                             |
| Reproductive system and breast disorders             | Retrograde ejaculation               | 0.95726 | Dyskinesia oesophageal       | Gastrointestinal disorders                           |

| Basis data for network                               |                             |         |                                      |                                                 |
|------------------------------------------------------|-----------------------------|---------|--------------------------------------|-------------------------------------------------|
| SOC1                                                 | AE1                         | score   | AE2                                  | SOC2                                            |
| Eye disorders                                        | Iris hyperpigmentation      | 0.95724 | Uterine hypertonus                   | Pregnancy, puerperium and perinatal conditions  |
| Injury, poisoning and procedural complications       | Spinal compression fracture | 0.95723 | Nitrogen balance negative            | Investigations                                  |
| Eye disorders                                        | Retinal pigmentation        | 0.95708 | Antiphospholipid syndrome            | Immune system disorders                         |
| Nervous system disorders                             | Meige's syndrome            | 0.95708 | Retinal pigmentation                 | Eye disorders                                   |
| General disorders and administration site conditions | Injection site nodule       | 0.95684 | Retrograde ejaculation               | Reproductive system and breast disorders        |
| Investigations                                       | Liver function test         | 0.95682 | Intestinal dilatation                | Gastrointestinal disorders                      |
| Gastrointestinal disorders                           | Rectal perforation          | 0.95674 | Urine chloride decreased             | Investigations                                  |
| Investigations                                       | Urine chloride decreased    | 0.95674 | Inborn error of metabolism           | Congenital, familial and genetic disorders      |
| Investigations                                       | Urine osmolarity decreased  | 0.95674 | Urine chloride decreased             | Investigations                                  |
| Musculoskeletal and connective tissue disorders      | Joint destruction           | 0.95674 | Urine chloride decreased             | Investigations                                  |
| Skin and subcutaneous tissue disorders               | Skin fragility              | 0.95671 | Alkalosis hypokalaemic               | Metabolism and nutrition disorders              |
| Investigations                                       | Sperm count increased       | 0.95659 | Blood antidiuretic hormone increased | Investigations                                  |
| Congenital, familial and genetic disorders           | Congenital nystagmus        | 0.95640 | Goitre congenital                    | Congenital, familial and genetic disorders      |
| Blood and lymphatic system disorders                 | Haemorrhagic disorder       | 0.95625 | Relapsing fever                      | Infections and infestations                     |
| Injury, poisoning and procedural complications       | Tendon injury               | 0.95619 | Panniculitis                         | Skin and subcutaneous tissue disorders          |
| Skin and subcutaneous tissue disorders               | Panniculitis                | 0.95619 | Scoliosis                            | Musculoskeletal and connective tissue disorders |
| Respiratory, thoracic and mediastinal disorders      | Laryngeal obstruction       | 0.95619 | Panniculitis                         | Skin and subcutaneous tissue disorders          |
| Skin and subcutaneous tissue disorders               | Panniculitis                | 0.95619 | Blood chromium decreased             | Investigations                                  |
| Eye disorders                                        | Scleromalacia               | 0.95619 | Panniculitis                         | Skin and subcutaneous tissue disorders          |
| Skin and subcutaneous tissue disorders               | Panniculitis                | 0.95619 | Posterior capsule opacification      | Eye disorders                                   |



| Basis data for network                               |                             |         |                                    |                                                      |
|------------------------------------------------------|-----------------------------|---------|------------------------------------|------------------------------------------------------|
| SOC1                                                 | AE1                         | score   | AE2                                | SOC2                                                 |
| Skin and subcutaneous tissue disorders               | Panniculitis                | 0.95619 | Nasal mucosa atrophy               | Respiratory, thoracic and mediastinal disorders      |
| Skin and subcutaneous tissue disorders               | Panniculitis                | 0.95619 | Chorioretinopathy                  | Eye disorders                                        |
| General disorders and administration site conditions | Injection site nodule       | 0.95589 | Sperm count increased              | Investigations                                       |
| Endocrine disorders                                  | Hypopituitarism             | 0.95588 | Alkalosis hypokalaemic             | Metabolism and nutrition disorders                   |
| Endocrine disorders                                  | Hypopituitarism             | 0.95576 | Fat atrophy                        | Skin and subcutaneous tissue disorders               |
| Gastrointestinal disorders                           | Ileal perforation           | 0.95572 | Hypopyon                           | Infections and infestations                          |
| Infections and infestations                          | Hypopyon                    | 0.95572 | Colonic stenosis                   | Gastrointestinal disorders                           |
| Gastrointestinal disorders                           | Ileal perforation           | 0.95572 | Conjunctival ulcer                 | Eye disorders                                        |
| Eye disorders                                        | Conjunctival ulcer          | 0.95572 | Colonic stenosis                   | Gastrointestinal disorders                           |
| Gastrointestinal disorders                           | Ileal perforation           | 0.95572 | Lid margin discharge               | Eye disorders                                        |
| Gastrointestinal disorders                           | Ileal perforation           | 0.95572 | Hypertrophy                        | General disorders and administration site conditions |
| Eye disorders                                        | Lid margin discharge        | 0.95572 | Colonic stenosis                   | Gastrointestinal disorders                           |
| Gastrointestinal disorders                           | Colonic stenosis            | 0.95572 | Hypertrophy                        | General disorders and administration site conditions |
| Congenital, familial and genetic disorders           | Limb reduction defect       | 0.95569 | Intestinal dilatation              | Gastrointestinal disorders                           |
| Infections and infestations                          | Corneal infection           | 0.95569 | Adrenocortical insufficiency acute | Endocrine disorders                                  |
| Cardiac disorders                                    | Grey syndrome neonatal      | 0.95567 | Corneal infection                  | Infections and infestations                          |
| Endocrine disorders                                  | Hypopituitarism             | 0.95520 | Myopathy steroid                   | Musculoskeletal and connective tissue disorders      |
| Gastrointestinal disorders                           | Dyskinesia oesophageal      | 0.95502 | Limb reduction defect              | Congenital, familial and genetic disorders           |
| Injury, poisoning and procedural complications       | Spinal compression fracture | 0.95502 | Hypopituitarism                    | Endocrine disorders                                  |
| Investigations                                       | Nitrogen balance negative   | 0.95480 | Fat atrophy                        | Skin and subcutaneous tissue disorders               |

| Basis data for network                               |                                            |         |                                            |                                                                     |
|------------------------------------------------------|--------------------------------------------|---------|--------------------------------------------|---------------------------------------------------------------------|
| SOC1                                                 | AE1                                        | score   | AE2                                        | SOC2                                                                |
| Investigations                                       | Sperm count increased                      | 0.95459 | Dyskinesia oesophageal                     | Gastrointestinal disorders                                          |
| General disorders and administration site conditions | Injection site abscess sterile             | 0.95449 | Fat atrophy                                | Skin and subcutaneous tissue disorders                              |
| Nervous system disorders                             | Facial spasm                               | 0.95444 | Injection site nodule                      | General disorders and administration site conditions                |
| Congenital, familial and genetic disorders           | Limb reduction defect                      | 0.95433 | Pregnancy test false positive              | Investigations                                                      |
| General disorders and administration site conditions | Infusion site inflammation                 | 0.95427 | Essential thrombocythaemia                 | Neoplasms benign, malignant and unspecified (incl cysts and polyps) |
| Injury, poisoning and procedural complications       | Spinal compression fracture                | 0.95402 | Cataract subcapsular                       | Eye disorders                                                       |
| Gastrointestinal disorders                           | Intestinal dilatation                      | 0.95346 | Blood growth hormone increased             | Investigations                                                      |
| Psychiatric disorders                                | Stereotypic movement disorder              | 0.95340 | Blood antidiuretic hormone increased       | Investigations                                                      |
| Skin and subcutaneous tissue disorders               | Palmar-plantar erythrodysesthesia syndrome | 0.95334 | Calciophylaxis                             | Metabolism and nutrition disorders                                  |
| Reproductive system and breast disorders             | Teratospermia                              | 0.95334 | Palmar-plantar erythrodysesthesia syndrome | Skin and subcutaneous tissue disorders                              |
| Reproductive system and breast disorders             | Retrograde ejaculation                     | 0.95330 | Aspermia                                   | Reproductive system and breast disorders                            |
| Investigations                                       | Oestradiol decreased                       | 0.95321 | Testis discomfort                          | Reproductive system and breast disorders                            |
| Infections and infestations                          | Listeriosis                                | 0.95321 | Oestradiol decreased                       | Investigations                                                      |
| Investigations                                       | Oestradiol decreased                       | 0.95321 | Injection site paraesthesia                | General disorders and administration site conditions                |
| Investigations                                       | Oestradiol decreased                       | 0.95321 | Throat cancer                              | Neoplasms benign, malignant and unspecified (incl cysts and polyps) |
| Investigations                                       | Blood growth hormone abnormal              | 0.95321 | Oestradiol decreased                       | Investigations                                                      |
| Investigations                                       | Oestradiol decreased                       | 0.95321 | Rectal polyp                               | Gastrointestinal disorders                                          |
| Investigations                                       | Oestradiol decreased                       | 0.95321 | Radius fracture                            | Injury, poisoning and procedural complications                      |
| Respiratory, thoracic and mediastinal disorders      | Pleural rub                                | 0.95321 | Oestradiol decreased                       | Investigations                                                      |
| General disorders and administration site conditions | Implant expulsion                          | 0.95321 | Oestradiol decreased                       | Investigations                                                      |

| Basis data for network                               |                                             |         |                                    |                                                                     |
|------------------------------------------------------|---------------------------------------------|---------|------------------------------------|---------------------------------------------------------------------|
| SOC1                                                 | AE1                                         | score   | AE2                                | SOC2                                                                |
| Investigations                                       | Total bile acids                            | 0.95317 | Carotene decreased                 | Investigations                                                      |
| Gastrointestinal disorders                           | Dyskinesia oesophageal                      | 0.95315 | Facial spasm                       | Nervous system disorders                                            |
| Gastrointestinal disorders                           | Dyskinesia oesophageal                      | 0.95309 | Laryngeal disorder                 | Respiratory, thoracic and mediastinal disorders                     |
| Investigations                                       | Blood oestrogen increased                   | 0.95299 | Accelerated idioventricular rhythm | Cardiac disorders                                                   |
| Cardiac disorders                                    | Accelerated idioventricular rhythm          | 0.95299 | Encephalitis herpes                | Infections and infestations                                         |
| Skin and subcutaneous tissue disorders               | Ephelides                                   | 0.95281 | Allergic oedema                    | Immune system disorders                                             |
| Endocrine disorders                                  | Adrenocortical insufficiency acute          | 0.95273 | Catabolic state                    | Metabolism and nutrition disorders                                  |
| Skin and subcutaneous tissue disorders               | Palmar-plantar erythrodysaesthesia syndrome | 0.95253 | Gastrointestinal injury            | Injury, poisoning and procedural complications                      |
| Infections and infestations                          | Mycobacterium avium complex infection       | 0.95250 | Oral mucosal petechiae             | Gastrointestinal disorders                                          |
| Gastrointestinal disorders                           | Oral mucosal petechiae                      | 0.95250 | Central line infection             | Infections and infestations                                         |
| General disorders and administration site conditions | Catheter site erythema                      | 0.95250 | Oral mucosal petechiae             | Gastrointestinal disorders                                          |
| Respiratory, thoracic and mediastinal disorders      | Mediastinal disorder                        | 0.95250 | Oral mucosal petechiae             | Gastrointestinal disorders                                          |
| Gastrointestinal disorders                           | Oral mucosal petechiae                      | 0.95250 | Peridiverticular abscess           | Infections and infestations                                         |
| Infections and infestations                          | Lung infection pseudomonal                  | 0.95250 | Oral mucosal petechiae             | Gastrointestinal disorders                                          |
| Infections and infestations                          | Pseudomonas infection                       | 0.95250 | Oral mucosal petechiae             | Gastrointestinal disorders                                          |
| Gastrointestinal disorders                           | Oral mucosal petechiae                      | 0.95250 | Catheter site haemorrhage          | General disorders and administration site conditions                |
| Gastrointestinal disorders                           | Dyskinesia oesophageal                      | 0.95230 | Stereotypic movement disorder      | Psychiatric disorders                                               |
| Investigations                                       | Blood oestrogen decreased                   | 0.95225 | Glioblastoma multiforme            | Neoplasms benign, malignant and unspecified (incl cysts and polyps) |
| Investigations                                       | Blood oestrogen decreased                   | 0.95225 | Phosphenes                         | Eye disorders                                                       |
| Reproductive system and breast disorders             | Ovarian enlargement                         | 0.95225 | Pituitary tumour                   | Neoplasms benign, malignant and unspecified (incl cysts and polyps) |

| Basis data for network                                              |                                             |         |                                             |                                                                     |
|---------------------------------------------------------------------|---------------------------------------------|---------|---------------------------------------------|---------------------------------------------------------------------|
| SOC1                                                                | AE1                                         | score   | AE2                                         | SOC2                                                                |
| Reproductive system and breast disorders                            | Ovarian enlargement                         | 0.95225 | Neurofibromatosis                           | Congenital, familial and genetic disorders                          |
| Reproductive system and breast disorders                            | Ovarian enlargement                         | 0.95225 | Choriocarcinoma                             | Neoplasms benign, malignant and unspecified (incl cysts and polyps) |
| Neoplasms benign, malignant and unspecified (incl cysts and polyps) | Prolactinoma                                | 0.95225 | Blood oestrogen decreased                   | Investigations                                                      |
| Congenital, familial and genetic disorders                          | Congenital joint malformation               | 0.95225 | Blood oestrogen decreased                   | Investigations                                                      |
| Reproductive system and breast disorders                            | Ovarian enlargement                         | 0.95225 | Dermoid cyst of ovary                       | Congenital, familial and genetic disorders                          |
| Neoplasms benign, malignant and unspecified (incl cysts and polyps) | Tongue neoplasm malignant stage unspecified | 0.95225 | Blood oestrogen decreased                   | Investigations                                                      |
| Respiratory, thoracic and mediastinal disorders                     | Acquired tracheo-oesophageal fistula        | 0.95225 | Blood oestrogen decreased                   | Investigations                                                      |
| Reproductive system and breast disorders                            | Ovarian enlargement                         | 0.95225 | Tongue neoplasm malignant stage unspecified | Neoplasms benign, malignant and unspecified (incl cysts and polyps) |
| Congenital, familial and genetic disorders                          | Congenital joint malformation               | 0.95225 | Ovarian enlargement                         | Reproductive system and breast disorders                            |
| Investigations                                                      | Blood oestrogen decreased                   | 0.95225 | Choriocarcinoma                             | Neoplasms benign, malignant and unspecified (incl cysts and polyps) |
| Investigations                                                      | Blood oestrogen decreased                   | 0.95225 | Pituitary tumour                            | Neoplasms benign, malignant and unspecified (incl cysts and polyps) |
| Investigations                                                      | Blood oestrogen decreased                   | 0.95225 | Neurofibromatosis                           | Congenital, familial and genetic disorders                          |
| Congenital, familial and genetic disorders                          | Anal atresia                                | 0.95225 | Blood oestrogen decreased                   | Investigations                                                      |
| Reproductive system and breast disorders                            | Ovarian enlargement                         | 0.95225 | Glioblastoma multiforme                     | Neoplasms benign, malignant and unspecified (incl cysts and polyps) |
| Neoplasms benign, malignant and unspecified (incl cysts and polyps) | Hepatoblastoma                              | 0.95225 | Blood oestrogen decreased                   | Investigations                                                      |
| Congenital, familial and genetic disorders                          | Anal atresia                                | 0.95225 | Ovarian enlargement                         | Reproductive system and breast disorders                            |
| Reproductive system and breast disorders                            | Ovarian enlargement                         | 0.95225 | Prolactinoma                                | Neoplasms benign, malignant and unspecified (incl cysts and polyps) |
| Neoplasms benign, malignant and unspecified (incl cysts and polyps) | Malignant hydatidiform mole                 | 0.95225 | Blood oestrogen decreased                   | Investigations                                                      |
| Musculoskeletal and connective tissue disorders                     | Dwarfism                                    | 0.95225 | Blood oestrogen decreased                   | Investigations                                                      |

| Basis data for network                          |                                      |         |                     |                                          |
|-------------------------------------------------|--------------------------------------|---------|---------------------|------------------------------------------|
| SOC1                                            | AE1                                  | score   | AE2                 | SOC2                                     |
| Respiratory, thoracic and mediastinal disorders | Acquired tracheo-oesophageal fistula | 0.95225 | Ovarian enlargement | Reproductive system and breast disorders |

| Basis data for network                                              |                                      |         |                                   |                                                                     |
|---------------------------------------------------------------------|--------------------------------------|---------|-----------------------------------|---------------------------------------------------------------------|
| SOC1                                                                | AE1                                  | score   | AE2                               | SOC2                                                                |
| Neoplasms benign, malignant and unspecified (incl cysts and polyps) | Hepatoblastoma                       | 0.95225 | Ovarian enlargement               | Reproductive system and breast disorders                            |
| Reproductive system and breast disorders                            | Ovarian enlargement                  | 0.95225 | Malignant hydatidiform mole       | Neoplasms benign, malignant and unspecified (incl cysts and polyps) |
| Eye disorders                                                       | Phosphenes                           | 0.95225 | Ovarian enlargement               | Reproductive system and breast disorders                            |
| Reproductive system and breast disorders                            | Ovarian enlargement                  | 0.95225 | Dwarfism                          | Musculoskeletal and connective tissue disorders                     |
| Congenital, familial and genetic disorders                          | Dermoid cyst of ovary                | 0.95225 | Blood oestrogen decreased         | Investigations                                                      |
| Investigations                                                      | Blood antidiuretic hormone increased | 0.95215 | Liver function test               | Investigations                                                      |
| Eye disorders                                                       | Retinal pigmentation                 | 0.95188 | Intestinal dilatation             | Gastrointestinal disorders                                          |
| General disorders and administration site conditions                | Injection site nodule                | 0.95175 | Stereotypic movement disorder     | Psychiatric disorders                                               |
| Congenital, familial and genetic disorders                          | Limb reduction defect                | 0.95165 | Injection site nodule             | General disorders and administration site conditions                |
| Infections and infestations                                         | Relapsing fever                      | 0.95161 | Colonic atony                     | Gastrointestinal disorders                                          |
| Investigations                                                      | Sperm count increased                | 0.95157 | Aspermia                          | Reproductive system and breast disorders                            |
| Congenital, familial and genetic disorders                          | Limb reduction defect                | 0.95147 | Aspermia                          | Reproductive system and breast disorders                            |
| Skin and subcutaneous tissue disorders                              | Fat atrophy                          | 0.95142 | Skin fragility                    | Skin and subcutaneous tissue disorders                              |
| Investigations                                                      | Blood antidiuretic hormone increased | 0.95117 | Limb reduction defect             | Congenital, familial and genetic disorders                          |
| Renal and urinary disorders                                         | Pancreatorenal syndrome              | 0.95116 | Papilloma                         | Neoplasms benign, malignant and unspecified (incl cysts and polyps) |
| Infections and infestations                                         | Diarrhoea infectious                 | 0.95116 | High density lipoprotein abnormal | Investigations                                                      |
| Infections and infestations                                         | Diarrhoea infectious                 | 0.95116 | Gastroenteritis cryptosporidial   | Infections and infestations                                         |
| Gastrointestinal disorders                                          | Painful defaecation                  | 0.95116 | Pancreatorenal syndrome           | Renal and urinary disorders                                         |
| Investigations                                                      | High density lipoprotein abnormal    | 0.95116 | Papilloma                         | Neoplasms benign, malignant and unspecified (incl cysts and polyps) |
| Infections and infestations                                         | Diarrhoea infectious                 | 0.95116 | Pancreatorenal syndrome           | Renal and urinary disorders                                         |

| Basis data for network                                              |                               |         |                                   |                                                 |
|---------------------------------------------------------------------|-------------------------------|---------|-----------------------------------|-------------------------------------------------|
| SOC1                                                                | AE1                           | score   | AE2                               | SOC2                                            |
| Gastrointestinal disorders                                          | Painful defaecation           | 0.95116 | Gastroenteritis cryptosporidial   | Infections and infestations                     |
| Neoplasms benign, malignant and unspecified (incl cysts and polyps) | Papilloma                     | 0.95116 | Gastroenteritis cryptosporidial   | Infections and infestations                     |
| Gastrointestinal disorders                                          | Painful defaecation           | 0.95116 | High density lipoprotein abnormal | Investigations                                  |
| Investigations                                                      | Liver function test           | 0.95108 | Aspermia                          | Reproductive system and breast disorders        |
| Eye disorders                                                       | Disorder of globe             | 0.95103 | Eye infection bacterial           | Infections and infestations                     |
| Eye disorders                                                       | Retinal pigmentation          | 0.95087 | Aspermia                          | Reproductive system and breast disorders        |
| General disorders and administration site conditions                | Injection site nodule         | 0.95081 | Liver function test               | Investigations                                  |
| Respiratory, thoracic and mediastinal disorders                     | Laryngeal disorder            | 0.95075 | Intestinal dilatation             | Gastrointestinal disorders                      |
| Musculoskeletal and connective tissue disorders                     | Scoliosis                     | 0.95047 | Cerebral venous thrombosis        | Nervous system disorders                        |
| Nervous system disorders                                            | Cerebral venous thrombosis    | 0.95047 | Tendon injury                     | Injury, poisoning and procedural complications  |
| Nervous system disorders                                            | Cerebral venous thrombosis    | 0.95047 | Blood chromium decreased          | Investigations                                  |
| Nervous system disorders                                            | Cerebral venous thrombosis    | 0.95047 | Chorioretinopathy                 | Eye disorders                                   |
| Respiratory, thoracic and mediastinal disorders                     | Nasal mucosa atrophy          | 0.95047 | Cerebral venous thrombosis        | Nervous system disorders                        |
| Nervous system disorders                                            | Cerebral venous thrombosis    | 0.95047 | Posterior capsule opacification   | Eye disorders                                   |
| Respiratory, thoracic and mediastinal disorders                     | Laryngeal obstruction         | 0.95047 | Cerebral venous thrombosis        | Nervous system disorders                        |
| Eye disorders                                                       | Scleromalacia                 | 0.95047 | Cerebral venous thrombosis        | Nervous system disorders                        |
| Cardiac disorders                                                   | Myocardial rupture            | 0.94964 | Nitrogen balance negative         | Investigations                                  |
| Reproductive system and breast disorders                            | Aspermia                      | 0.94948 | Facial spasm                      | Nervous system disorders                        |
| Psychiatric disorders                                               | Stereotypic movement disorder | 0.94946 | Retrograde ejaculation            | Reproductive system and breast disorders        |
| Injury, poisoning and procedural complications                      | Hip fracture                  | 0.94945 | Nasal mucosa atrophy              | Respiratory, thoracic and mediastinal disorders |

| Basis data for network                          |                                             |         |                                            |                                                      |
|-------------------------------------------------|---------------------------------------------|---------|--------------------------------------------|------------------------------------------------------|
| SOC1                                            | AE1                                         | score   | AE2                                        | SOC2                                                 |
| Injury, poisoning and procedural complications  | Hip fracture                                | 0.94945 | Laryngeal obstruction                      | Respiratory, thoracic and mediastinal disorders      |
| Injury, poisoning and procedural complications  | Hip fracture                                | 0.94945 | Posterior capsule opacification            | Eye disorders                                        |
| Injury, poisoning and procedural complications  | Hip fracture                                | 0.94945 | Tendon injury                              | Injury, poisoning and procedural complications       |
| Injury, poisoning and procedural complications  | Hip fracture                                | 0.94945 | Blood chromium decreased                   | Investigations                                       |
| Injury, poisoning and procedural complications  | Hip fracture                                | 0.94945 | Scoliosis                                  | Musculoskeletal and connective tissue disorders      |
| Eye disorders                                   | Chorioretinopathy                           | 0.94945 | Hip fracture                               | Injury, poisoning and procedural complications       |
| Injury, poisoning and procedural complications  | Hip fracture                                | 0.94945 | Scleromalacia                              | Eye disorders                                        |
| Gastrointestinal disorders                      | Dyskinesia oesophageal                      | 0.94945 | Liver function test                        | Investigations                                       |
| Respiratory, thoracic and mediastinal disorders | Nasal septum disorder                       | 0.94932 | Cortisol free urine decreased              | Investigations                                       |
| Skin and subcutaneous tissue disorders          | Palmar-plantar erythrodysaesthesia syndrome | 0.94926 | Injection site extravasation               | General disorders and administration site conditions |
| Investigations                                  | Sperm count increased                       | 0.94924 | Blood growth hormone increased             | Investigations                                       |
| Infections and infestations                     | Relapsing fever                             | 0.94922 | Jarisch-Herxheimer reaction                | Immune system disorders                              |
| Cardiac disorders                               | Myocardial rupture                          | 0.94916 | Hypertrophic cardiomyopathy                | Cardiac disorders                                    |
| Eye disorders                                   | Lens disorder                               | 0.94885 | Retinal oedema                             | Eye disorders                                        |
| Investigations                                  | Coagulation factor VIII level increased     | 0.94874 | Von Willebrand's factor multimers abnormal | Investigations                                       |
| Investigations                                  | Coagulation factor VIII level increased     | 0.94874 | Uterine pain                               | Reproductive system and breast disorders             |
| Investigations                                  | Coagulation factor VIII level increased     | 0.94874 | Protein C increased                        | Investigations                                       |
| Investigations                                  | Blood growth hormone increased              | 0.94851 | Blood antidiuretic hormone increased       | Investigations                                       |
| Psychiatric disorders                           | Stereotypic movement disorder               | 0.94813 | Aspermia                                   | Reproductive system and breast disorders             |
| Investigations                                  | Blood growth hormone increased              | 0.94794 | Aspermia                                   | Reproductive system and breast disorders             |



| Basis data for network                               |                                       |         |                                   |                                                      |
|------------------------------------------------------|---------------------------------------|---------|-----------------------------------|------------------------------------------------------|
| SOC1                                                 | AE1                                   | score   | AE2                               | SOC2                                                 |
| Investigations                                       | Blood antidiuretic hormone increased  | 0.94778 | Retinal pigmentation              | Eye disorders                                        |
| Investigations                                       | Blood growth hormone increased        | 0.94764 | Dyskinesia oesophageal            | Gastrointestinal disorders                           |
| Reproductive system and breast disorders             | Vaginal odour                         | 0.94761 | Vulval erythema                   | Reproductive system and breast disorders             |
| Infections and infestations                          | Hepatitis B                           | 0.94758 | Syphilis                          | Infections and infestations                          |
| Infections and infestations                          | Hepatitis B                           | 0.94758 | Mitral valve prolapse             | Cardiac disorders                                    |
| Investigations                                       | Acoustic stimulation tests abnormal   | 0.94734 | Coprolalia                        | Psychiatric disorders                                |
| Gastrointestinal disorders                           | Gastrointestinal ischaemia            | 0.94725 | Cerebellar artery occlusion       | Nervous system disorders                             |
| General disorders and administration site conditions | Injection site nodule                 | 0.94723 | Blood growth hormone increased    | Investigations                                       |
| Metabolism and nutrition disorders                   | Catabolic state                       | 0.94654 | Panniculitis                      | Skin and subcutaneous tissue disorders               |
| Psychiatric disorders                                | Depression suicidal                   | 0.94650 | Exercise tolerance decreased      | General disorders and administration site conditions |
| Investigations                                       | Pulmonary arterial pressure decreased | 0.94622 | Breath holding                    | Psychiatric disorders                                |
| Injury, poisoning and procedural complications       | Postoperative fever                   | 0.94622 | Breath holding                    | Psychiatric disorders                                |
| Psychiatric disorders                                | Breath holding                        | 0.94622 | Fluorosis                         | Injury, poisoning and procedural complications       |
| Respiratory, thoracic and mediastinal disorders      | Laryngeal disorder                    | 0.94593 | Injection site nodule             | General disorders and administration site conditions |
| Investigations                                       | Blood antidiuretic hormone increased  | 0.94537 | Laryngeal disorder                | Respiratory, thoracic and mediastinal disorders      |
| Infections and infestations                          | Corneal infection                     | 0.94528 | Panniculitis                      | Skin and subcutaneous tissue disorders               |
| Hepatobiliary disorders                              | Hyperbilirubinaemia neonatal          | 0.94521 | Subarachnoid haemorrhage neonatal | Nervous system disorders                             |
| Hepatobiliary disorders                              | Hyperbilirubinaemia neonatal          | 0.94521 | Haemophilia                       | Congenital, familial and genetic disorders           |
| Hepatobiliary disorders                              | Hyperbilirubinaemia neonatal          | 0.94521 | Epidermolysis bullosa             | Congenital, familial and genetic disorders           |
| Gastrointestinal disorders                           | Dyskinesia oesophageal                | 0.94500 | Retinal pigmentation              | Eye disorders                                        |

| Basis data for network                          |                                  |         |                                      |                                                      |
|-------------------------------------------------|----------------------------------|---------|--------------------------------------|------------------------------------------------------|
| SOC1                                            | AE1                              | score   | AE2                                  | SOC2                                                 |
| Endocrine disorders                             | Hypoadosteronism                 | 0.94493 | Neutrophil toxic granulation present | Investigations                                       |
| Vascular disorders                              | Arterial stenosis                | 0.94489 | Cerebellar artery occlusion          | Nervous system disorders                             |
| Nervous system disorders                        | Facial spasm                     | 0.94478 | Retrograde ejaculation               | Reproductive system and breast disorders             |
| Gastrointestinal disorders                      | Anal inflammation                | 0.94465 | Biopsy thyroid gland abnormal        | Investigations                                       |
| Injury, poisoning and procedural complications  | Spinal fracture                  | 0.94455 | Fat atrophy                          | Skin and subcutaneous tissue disorders               |
| Eye disorders                                   | Retinal pigmentation             | 0.94452 | Injection site nodule                | General disorders and administration site conditions |
| Investigations                                  | Dehydroepiandrosterone increased | 0.94436 | Progesterone increased               | Investigations                                       |
| Psychiatric disorders                           | Stereotypic movement disorder    | 0.94423 | Tongue paralysis                     | Nervous system disorders                             |
| Respiratory, thoracic and mediastinal disorders | Laryngeal disorder               | 0.94397 | Aspermia                             | Reproductive system and breast disorders             |
| Eye disorders                                   | Lens disorder                    | 0.94383 | Renal vasculitis                     | Renal and urinary disorders                          |
| Eye disorders                                   | Posterior capsule opacification  | 0.94336 | Fat atrophy                          | Skin and subcutaneous tissue disorders               |
| Eye disorders                                   | Scleromalacia                    | 0.94336 | Fat atrophy                          | Skin and subcutaneous tissue disorders               |
| Musculoskeletal and connective tissue disorders | Scoliosis                        | 0.94336 | Fat atrophy                          | Skin and subcutaneous tissue disorders               |
| Respiratory, thoracic and mediastinal disorders | Nasal mucosa atrophy             | 0.94336 | Fat atrophy                          | Skin and subcutaneous tissue disorders               |
| Eye disorders                                   | Chorioretinopathy                | 0.94336 | Fat atrophy                          | Skin and subcutaneous tissue disorders               |
| Skin and subcutaneous tissue disorders          | Fat atrophy                      | 0.94336 | Laryngeal obstruction                | Respiratory, thoracic and mediastinal disorders      |
| Skin and subcutaneous tissue disorders          | Fat atrophy                      | 0.94336 | Tendon injury                        | Injury, poisoning and procedural complications       |
| Investigations                                  | Blood chromium decreased         | 0.94336 | Fat atrophy                          | Skin and subcutaneous tissue disorders               |
| Hepatobiliary disorders                         | Biliary dilatation               | 0.94318 | Joint effusion                       | Musculoskeletal and connective tissue disorders      |
| Endocrine disorders                             | Pituitary haemorrhage            | 0.94318 | Joint effusion                       | Musculoskeletal and connective tissue disorders      |

| Basis data for network                                              |                                        |         |                                               |                                                                     |
|---------------------------------------------------------------------|----------------------------------------|---------|-----------------------------------------------|---------------------------------------------------------------------|
| SOC1                                                                | AE1                                    | score   | AE2                                           | SOC2                                                                |
| Musculoskeletal and connective tissue disorders                     | Joint effusion                         | 0.94318 | Renal abscess                                 | Infections and infestations                                         |
| General disorders and administration site conditions                | Microlithiasis                         | 0.94318 | Joint effusion                                | Musculoskeletal and connective tissue disorders                     |
| Musculoskeletal and connective tissue disorders                     | Joint effusion                         | 0.94318 | Biliary neoplasm                              | Neoplasms benign, malignant and unspecified (incl cysts and polyps) |
| Neoplasms benign, malignant and unspecified (incl cysts and polyps) | Bladder papilloma                      | 0.94318 | Joint effusion                                | Musculoskeletal and connective tissue disorders                     |
| Injury, poisoning and procedural complications                      | Spinal compression fracture            | 0.94295 | Injection site abscess sterile                | General disorders and administration site conditions                |
| Investigations                                                      | Pregnancy test false positive          | 0.94289 | Sperm count increased                         | Investigations                                                      |
| Renal and urinary disorders                                         | Glomerulonephritis rapidly progressive | 0.94285 | Tear discolouration                           | Eye disorders                                                       |
| Skin and subcutaneous tissue disorders                              | Red man syndrome                       | 0.94285 | Glomerulonephritis rapidly progressive        | Renal and urinary disorders                                         |
| Renal and urinary disorders                                         | Glomerulonephritis rapidly progressive | 0.94285 | Blood 1,25-dihydroxycholecalciferol decreased | Investigations                                                      |
| Investigations                                                      | Urine vitamin K decreased              | 0.94285 | Glomerulonephritis rapidly progressive        | Renal and urinary disorders                                         |
| Renal and urinary disorders                                         | Glomerulonephritis rapidly progressive | 0.94285 | Saliva discolouration                         | Gastrointestinal disorders                                          |
| Blood and lymphatic system disorders                                | Hypercoagulation                       | 0.94249 | Catabolic state                               | Metabolism and nutrition disorders                                  |
| Injury, poisoning and procedural complications                      | Chemical cystitis                      | 0.94244 | Respiratory moniliasis                        | Infections and infestations                                         |
| Injury, poisoning and procedural complications                      | Chemical cystitis                      | 0.94244 | Peritoneal fibrosis                           | Gastrointestinal disorders                                          |
| Injury, poisoning and procedural complications                      | Chemical cystitis                      | 0.94244 | Pancreatic fistula                            | Gastrointestinal disorders                                          |
| Musculoskeletal and connective tissue disorders                     | Neuropathic arthropathy                | 0.94242 | Hypertrophic cardiomyopathy                   | Cardiac disorders                                                   |
| Investigations                                                      | Pregnancy test false positive          | 0.94227 | Retrograde ejaculation                        | Reproductive system and breast disorders                            |
| Nervous system disorders                                            | Tardive dyskinesia                     | 0.94203 | Neuroleptic malignant syndrome                | Nervous system disorders                                            |
| Metabolism and nutrition disorders                                  | Alkalosis hypokalaemic                 | 0.94184 | Cushingoid                                    | Endocrine disorders                                                 |
| Investigations                                                      | Blood oestrogen decreased              | 0.94172 | Leiomyoma                                     | Neoplasms benign, malignant and unspecified (incl cysts and polyps) |

| Basis data for network                                              |                                             |         |                            |                                                      |
|---------------------------------------------------------------------|---------------------------------------------|---------|----------------------------|------------------------------------------------------|
| SOC1                                                                | AE1                                         | score   | AE2                        | SOC2                                                 |
| Neoplasms benign, malignant and unspecified (incl cysts and polyps) | Leiomyoma                                   | 0.94172 | Ovarian enlargement        | Reproductive system and breast disorders             |
| Investigations                                                      | Blood homocysteine increased                | 0.94165 | Hunger                     | General disorders and administration site conditions |
| Psychiatric disorders                                               | Stereotypic movement disorder               | 0.94151 | Retinal pigmentation       | Eye disorders                                        |
| Investigations                                                      | Blood thyroid stimulating hormone increased | 0.94141 | Teratospermia              | Reproductive system and breast disorders             |
| Investigations                                                      | Blood thyroid stimulating hormone increased | 0.94141 | Calciophylaxis             | Metabolism and nutrition disorders                   |
| Endocrine disorders                                                 | Cushingoid                                  | 0.94095 | Myopathy steroid           | Musculoskeletal and connective tissue disorders      |
| Skin and subcutaneous tissue disorders                              | Fat atrophy                                 | 0.94089 | Corneal infection          | Infections and infestations                          |
| Investigations                                                      | Blood thyroid stimulating hormone increased | 0.94060 | Gastrointestinal injury    | Injury, poisoning and procedural complications       |
| Metabolism and nutrition disorders                                  | Catabolic state                             | 0.94055 | Cerebral venous thrombosis | Nervous system disorders                             |
| Cardiac disorders                                                   | Hypertrophic cardiomyopathy                 | 0.94047 | Nitrogen balance negative  | Investigations                                       |
| Eye disorders                                                       | Chorioretinopathy                           | 0.94045 | Hypercoagulation           | Blood and lymphatic system disorders                 |
| Blood and lymphatic system disorders                                | Hypercoagulation                            | 0.94045 | Laryngeal obstruction      | Respiratory, thoracic and mediastinal disorders      |
| Eye disorders                                                       | Posterior capsule opacification             | 0.94045 | Hypercoagulation           | Blood and lymphatic system disorders                 |
| Eye disorders                                                       | Scleromalacia                               | 0.94045 | Hypercoagulation           | Blood and lymphatic system disorders                 |
| Injury, poisoning and procedural complications                      | Tendon injury                               | 0.94045 | Hypercoagulation           | Blood and lymphatic system disorders                 |
| Respiratory, thoracic and mediastinal disorders                     | Nasal mucosa atrophy                        | 0.94045 | Hypercoagulation           | Blood and lymphatic system disorders                 |
| Blood and lymphatic system disorders                                | Hypercoagulation                            | 0.94045 | Scoliosis                  | Musculoskeletal and connective tissue disorders      |
| Investigations                                                      | Blood chromium decreased                    | 0.94045 | Hypercoagulation           | Blood and lymphatic system disorders                 |
| Pregnancy, puerperium and perinatal conditions                      | Labour complication                         | 0.94040 | Neonatal tachypnoea        | Respiratory, thoracic and mediastinal disorders      |
| Pregnancy, puerperium and perinatal conditions                      | Labour complication                         | 0.94040 | Neonatal infection         | Infections and infestations                          |

| Basis data for network                               |                                               |         |                        |                                                                     |
|------------------------------------------------------|-----------------------------------------------|---------|------------------------|---------------------------------------------------------------------|
| SOC1                                                 | AE1                                           | score   | AE2                    | SOC2                                                                |
| Pregnancy, puerperium and perinatal conditions       | Antepartum haemorrhage                        | 0.94040 | Neonatal infection     | Infections and infestations                                         |
| General disorders and administration site conditions | Fever neonatal                                | 0.94040 | Delayed delivery       | Pregnancy, puerperium and perinatal conditions                      |
| Pregnancy, puerperium and perinatal conditions       | Delayed delivery                              | 0.94040 | Neonatal tachypnoea    | Respiratory, thoracic and mediastinal disorders                     |
| Infections and infestations                          | Neonatal infection                            | 0.94040 | Delayed delivery       | Pregnancy, puerperium and perinatal conditions                      |
| Pregnancy, puerperium and perinatal conditions       | Labour complication                           | 0.94040 | Fever neonatal         | General disorders and administration site conditions                |
| Pregnancy, puerperium and perinatal conditions       | Antepartum haemorrhage                        | 0.94040 | Neonatal pneumonia     | Infections and infestations                                         |
| Gastrointestinal disorders                           | Vomiting neonatal                             | 0.94040 | Delayed delivery       | Pregnancy, puerperium and perinatal conditions                      |
| Pregnancy, puerperium and perinatal conditions       | Antepartum haemorrhage                        | 0.94040 | Fever neonatal         | General disorders and administration site conditions                |
| Pregnancy, puerperium and perinatal conditions       | Labour complication                           | 0.94040 | Neonatal pneumonia     | Infections and infestations                                         |
| Pregnancy, puerperium and perinatal conditions       | Delayed delivery                              | 0.94040 | Neonatal pneumonia     | Infections and infestations                                         |
| Pregnancy, puerperium and perinatal conditions       | Labour complication                           | 0.94040 | Vomiting neonatal      | Gastrointestinal disorders                                          |
| Respiratory, thoracic and mediastinal disorders      | Neonatal tachypnoea                           | 0.94040 | Antepartum haemorrhage | Pregnancy, puerperium and perinatal conditions                      |
| Gastrointestinal disorders                           | Vomiting neonatal                             | 0.94040 | Antepartum haemorrhage | Pregnancy, puerperium and perinatal conditions                      |
| Endocrine disorders                                  | Adrenocortical insufficiency acute            | 0.94000 | Grey syndrome neonatal | Cardiac disorders                                                   |
| Investigations                                       | Blood 1,25-dihydroxycholecalciferol decreased | 0.93992 | Gastritis alcoholic    | Gastrointestinal disorders                                          |
| Gastrointestinal disorders                           | Saliva discolouration                         | 0.93992 | Gastritis alcoholic    | Gastrointestinal disorders                                          |
| Investigations                                       | Vitamin D decreased                           | 0.93992 | Tear discolouration    | Eye disorders                                                       |
| Investigations                                       | Urine vitamin K decreased                     | 0.93992 | Gastritis alcoholic    | Gastrointestinal disorders                                          |
| Investigations                                       | Urine vitamin K decreased                     | 0.93992 | Lung adenocarcinoma    | Neoplasms benign, malignant and unspecified (incl cysts and polyps) |
| Eye disorders                                        | Tear discolouration                           | 0.93992 | Gastritis alcoholic    | Gastrointestinal disorders                                          |

| Basis data for network                                              |                                               |         |                                               |                                                                     |
|---------------------------------------------------------------------|-----------------------------------------------|---------|-----------------------------------------------|---------------------------------------------------------------------|
| SOC1                                                                | AE1                                           | score   | AE2                                           | SOC2                                                                |
| Neoplasms benign, malignant and unspecified (incl cysts and polyps) | Lung adenocarcinoma                           | 0.93992 | Blood 1,25-dihydroxycholecalciferol decreased | Investigations                                                      |
| Gastrointestinal disorders                                          | Saliva discolouration                         | 0.93992 | Blood uric acid                               | Investigations                                                      |
| Investigations                                                      | Blood uric acid                               | 0.93992 | Tear discolouration                           | Eye disorders                                                       |
| Investigations                                                      | Blood 1,25-dihydroxycholecalciferol decreased | 0.93992 | Blood uric acid                               | Investigations                                                      |
| Investigations                                                      | Blood uric acid                               | 0.93992 | Urine vitamin K decreased                     | Investigations                                                      |
| Gastrointestinal disorders                                          | Saliva discolouration                         | 0.93992 | Lung adenocarcinoma                           | Neoplasms benign, malignant and unspecified (incl cysts and polyps) |
| Skin and subcutaneous tissue disorders                              | Red man syndrome                              | 0.93992 | Gastritis alcoholic                           | Gastrointestinal disorders                                          |
| Skin and subcutaneous tissue disorders                              | Red man syndrome                              | 0.93992 | Vitamin D decreased                           | Investigations                                                      |
| Neoplasms benign, malignant and unspecified (incl cysts and polyps) | Lung adenocarcinoma                           | 0.93992 | Red man syndrome                              | Skin and subcutaneous tissue disorders                              |
| Investigations                                                      | Vitamin D decreased                           | 0.93992 | Urine vitamin K decreased                     | Investigations                                                      |
| Neoplasms benign, malignant and unspecified (incl cysts and polyps) | Lung adenocarcinoma                           | 0.93992 | Tear discolouration                           | Eye disorders                                                       |
| Investigations                                                      | Vitamin D decreased                           | 0.93992 | Blood 1,25-dihydroxycholecalciferol decreased | Investigations                                                      |
| Skin and subcutaneous tissue disorders                              | Red man syndrome                              | 0.93992 | Blood uric acid                               | Investigations                                                      |
| Gastrointestinal disorders                                          | Saliva discolouration                         | 0.93992 | Vitamin D decreased                           | Investigations                                                      |
| Nervous system disorders                                            | Facial spasm                                  | 0.93985 | Pregnancy test false positive                 | Investigations                                                      |
| General disorders and administration site conditions                | Injection site abscess sterile                | 0.93963 | Nitrogen balance negative                     | Investigations                                                      |
| Skin and subcutaneous tissue disorders                              | Skin fragility                                | 0.93953 | Spinal compression fracture                   | Injury, poisoning and procedural complications                      |
| Metabolism and nutrition disorders                                  | Catabolic state                               | 0.93948 | Hip fracture                                  | Injury, poisoning and procedural complications                      |
| Investigations                                                      | Spermatozoa progressive motility decreased    | 0.93938 | Sperm count increased                         | Investigations                                                      |
| Endocrine disorders                                                 | Adrenocortical insufficiency acute            | 0.93913 | Cataract subcapsular                          | Eye disorders                                                       |

| Basis data for network                               |                                        |         |                                        |                                                 |
|------------------------------------------------------|----------------------------------------|---------|----------------------------------------|-------------------------------------------------|
| SOC1                                                 | AE1                                    | score   | AE2                                    | SOC2                                            |
| Endocrine disorders                                  | Testicular failure                     | 0.93892 | Epiphyses premature fusion             | Musculoskeletal and connective tissue disorders |
| Investigations                                       | Sperm count increased                  | 0.93892 | Laryngeal disorder                     | Respiratory, thoracic and mediastinal disorders |
| Endocrine disorders                                  | Hypopituitarism                        | 0.93891 | Nitrogen balance negative              | Investigations                                  |
| Skin and subcutaneous tissue disorders               | Skin fragility                         | 0.93884 | Secondary adrenocortical insufficiency | Endocrine disorders                             |
| Investigations                                       | Blood testosterone decreased           | 0.93869 | Blood luteinising hormone decreased    | Investigations                                  |
| Skin and subcutaneous tissue disorders               | Panniculitis                           | 0.93868 | Spinal fracture                        | Injury, poisoning and procedural complications  |
| Investigations                                       | Nitrogen balance negative              | 0.93868 | Secondary adrenocortical insufficiency | Endocrine disorders                             |
| Endocrine disorders                                  | Hypopituitarism                        | 0.93865 | Adrenocortical insufficiency acute     | Endocrine disorders                             |
| General disorders and administration site conditions | Injection site abscess sterile         | 0.93856 | Secondary adrenocortical insufficiency | Endocrine disorders                             |
| Investigations                                       | Blood oestrogen increased              | 0.93834 | Learning disorder                      | Psychiatric disorders                           |
| Infections and infestations                          | Encephalitis herpes                    | 0.93834 | Learning disorder                      | Psychiatric disorders                           |
| Endocrine disorders                                  | Secondary adrenocortical insufficiency | 0.93829 | Cataract subcapsular                   | Eye disorders                                   |
| Endocrine disorders                                  | Adrenocortical insufficiency acute     | 0.93790 | Hypertrophic cardiomyopathy            | Cardiac disorders                               |
| Endocrine disorders                                  | Virilism                               | 0.93780 | Catabolic state                        | Metabolism and nutrition disorders              |
| Respiratory, thoracic and mediastinal disorders      | Aspiration                             | 0.93757 | Pregnancy test false positive          | Investigations                                  |
| Endocrine disorders                                  | Cushingoid                             | 0.93741 | Fat atrophy                            | Skin and subcutaneous tissue disorders          |
| Metabolism and nutrition disorders                   | Catabolic state                        | 0.93686 | Fat atrophy                            | Skin and subcutaneous tissue disorders          |
| Infections and infestations                          | Corneal infection                      | 0.93670 | Cerebral venous thrombosis             | Nervous system disorders                        |
| Vascular disorders                                   | Neonatal hypotension                   | 0.93661 | Neonatal anuria                        | Renal and urinary disorders                     |
| Congenital, familial and genetic disorders           | Pulmonary hypoplasia                   | 0.93661 | Neonatal anuria                        | Renal and urinary disorders                     |

| Basis data for network                     |                                        |         |                               |                                                 |
|--------------------------------------------|----------------------------------------|---------|-------------------------------|-------------------------------------------------|
| SOC1                                       | AE1                                    | score   | AE2                           | SOC2                                            |
| Investigations                             | Pregnancy test false positive          | 0.93647 | Liver function test           | Investigations                                  |
| Skin and subcutaneous tissue disorders     | Lipodystrophy acquired                 | 0.93629 | Hyperamylasaemia              | Metabolism and nutrition disorders              |
| Cardiac disorders                          | Grey syndrome neonatal                 | 0.93614 | Fat atrophy                   | Skin and subcutaneous tissue disorders          |
| Investigations                             | Nitrogen balance negative              | 0.93601 | Neuropathic arthropathy       | Musculoskeletal and connective tissue disorders |
| Endocrine disorders                        | Secondary adrenocortical insufficiency | 0.93574 | Hypopituitarism               | Endocrine disorders                             |
| Gastrointestinal disorders                 | Splenic artery aneurysm                | 0.93518 | Tongue spasm                  | Gastrointestinal disorders                      |
| Gastrointestinal disorders                 | Tongue spasm                           | 0.93518 | Rectal stenosis               | Gastrointestinal disorders                      |
| Congenital, familial and genetic disorders | Limb reduction defect                  | 0.93517 | Liver function test           | Investigations                                  |
| Skin and subcutaneous tissue disorders     | Vasculitic rash                        | 0.93511 | Fungal oesophagitis           | Infections and infestations                     |
| Skin and subcutaneous tissue disorders     | Vasculitic rash                        | 0.93511 | Myringitis                    | Infections and infestations                     |
| Ear and labyrinth disorders                | Aural polyp                            | 0.93511 | Vasculitic rash               | Skin and subcutaneous tissue disorders          |
| Infections and infestations                | Pharyngeal candidiasis                 | 0.93511 | Vasculitic rash               | Skin and subcutaneous tissue disorders          |
| Skin and subcutaneous tissue disorders     | Vasculitic rash                        | 0.93511 | Herpetic stomatitis           | Infections and infestations                     |
| Investigations                             | Creatinine urine decreased             | 0.93511 | Vasculitic rash               | Skin and subcutaneous tissue disorders          |
| Infections and infestations                | Eczema infected                        | 0.93511 | Vasculitic rash               | Skin and subcutaneous tissue disorders          |
| Skin and subcutaneous tissue disorders     | Vasculitic rash                        | 0.93511 | Pharyngeal polyp              | Respiratory, thoracic and mediastinal disorders |
| Nervous system disorders                   | Facial spasm                           | 0.93474 | Limb reduction defect         | Congenital, familial and genetic disorders      |
| Investigations                             | Pregnancy test false positive          | 0.93474 | Stereotypic movement disorder | Psychiatric disorders                           |
| Endocrine disorders                        | Cushingoid                             | 0.93440 | Cataract subcapsular          | Eye disorders                                   |
| Investigations                             | Liver function test                    | 0.93427 | Retrograde ejaculation        | Reproductive system and breast disorders        |



| Basis data for network                                              |                                    |         |                                |                                                                     |
|---------------------------------------------------------------------|------------------------------------|---------|--------------------------------|---------------------------------------------------------------------|
| SOC1                                                                | AE1                                | score   | AE2                            | SOC2                                                                |
| Endocrine disorders                                                 | Cushingoid                         | 0.93407 | Spinal compression fracture    | Injury, poisoning and procedural complications                      |
| Endocrine disorders                                                 | Adrenocortical insufficiency acute | 0.93399 | Nitrogen balance negative      | Investigations                                                      |
| Musculoskeletal and connective tissue disorders                     | Neuropathic arthropathy            | 0.93396 | Injection site abscess sterile | General disorders and administration site conditions                |
| Investigations                                                      | Sperm count increased              | 0.93394 | Liver function test            | Investigations                                                      |
| Psychiatric disorders                                               | Stereotypic movement disorder      | 0.93379 | Blood growth hormone increased | Investigations                                                      |
| Eye disorders                                                       | Retinal pigmentation               | 0.93357 | Pregnancy test false positive  | Investigations                                                      |
| Reproductive system and breast disorders                            | Retrograde ejaculation             | 0.93345 | Sperm count increased          | Investigations                                                      |
| Endocrine disorders                                                 | Adrenal cortex atrophy             | 0.93344 | Male pattern baldness          | Skin and subcutaneous tissue disorders                              |
| Investigations                                                      | Pregnancy test false positive      | 0.93337 | Blood growth hormone increased | Investigations                                                      |
| Eye disorders                                                       | Retinal pigmentation               | 0.93309 | Liver function test            | Investigations                                                      |
| Nervous system disorders                                            | Trigeminal neuralgia               | 0.93290 | Encephalitis herpes            | Infections and infestations                                         |
| Nervous system disorders                                            | Trigeminal neuralgia               | 0.93290 | Blood oestrogen increased      | Investigations                                                      |
| Investigations                                                      | CSF protein abnormal               | 0.93289 | Neurogenic bladder             | Renal and urinary disorders                                         |
| Reproductive system and breast disorders                            | Retrograde ejaculation             | 0.93282 | Blood growth hormone increased | Investigations                                                      |
| Investigations                                                      | Vitamin B12 decreased              | 0.93282 | Bladder papilloma              | Neoplasms benign, malignant and unspecified (incl cysts and polyps) |
| Neoplasms benign, malignant and unspecified (incl cysts and polyps) | Biliary neoplasm                   | 0.93282 | Vitamin B12 decreased          | Investigations                                                      |
| Hepatobiliary disorders                                             | Biliary dilatation                 | 0.93282 | Vitamin B12 decreased          | Investigations                                                      |
| General disorders and administration site conditions                | Microlithiasis                     | 0.93282 | Vitamin B12 decreased          | Investigations                                                      |
| Endocrine disorders                                                 | Pituitary haemorrhage              | 0.93282 | Vitamin B12 decreased          | Investigations                                                      |
| Infections and infestations                                         | Renal abscess                      | 0.93282 | Vitamin B12 decreased          | Investigations                                                      |

| Basis data for network                          |                               |         |                                 |                                                 |
|-------------------------------------------------|-------------------------------|---------|---------------------------------|-------------------------------------------------|
| SOC1                                            | AE1                           | score   | AE2                             | SOC2                                            |
| Congenital, familial and genetic disorders      | Limb reduction defect         | 0.93280 | Sperm count increased           | Investigations                                  |
| Reproductive system and breast disorders        | Retrograde ejaculation        | 0.93271 | Retinal pigmentation            | Eye disorders                                   |
| Metabolism and nutrition disorders              | Alkalosis hypokalaemic        | 0.93265 | Corneal infection               | Infections and infestations                     |
| Reproductive system and breast disorders        | Withdrawal bleed              | 0.93254 | Cervical discharge              | Reproductive system and breast disorders        |
| Respiratory, thoracic and mediastinal disorders | Pulmonary granuloma           | 0.93234 | Blood corticotrophin decreased  | Investigations                                  |
| Injury, poisoning and procedural complications  | Spinal fracture               | 0.93217 | Cerebral venous thrombosis      | Nervous system disorders                        |
| Reproductive system and breast disorders        | Retrograde ejaculation        | 0.93210 | Limb reduction defect           | Congenital, familial and genetic disorders      |
| Eye disorders                                   | Retinal oedema                | 0.93184 | Renal vasculitis                | Renal and urinary disorders                     |
| Metabolism and nutrition disorders              | Alkalosis hypokalaemic        | 0.93183 | Spinal fracture                 | Injury, poisoning and procedural complications  |
| Injury, poisoning and procedural complications  | Hip fracture                  | 0.93181 | Corneal infection               | Infections and infestations                     |
| Injury, poisoning and procedural complications  | Spinal fracture               | 0.93142 | Hip fracture                    | Injury, poisoning and procedural complications  |
| Psychiatric disorders                           | Stereotypic movement disorder | 0.93139 | Facial spasm                    | Nervous system disorders                        |
| Cardiac disorders                               | Hypertrophic cardiomyopathy   | 0.93133 | Myopathy steroid                | Musculoskeletal and connective tissue disorders |
| Nervous system disorders                        | Facial spasm                  | 0.93130 | Retinal pigmentation            | Eye disorders                                   |
| Respiratory, thoracic and mediastinal disorders | Nasal mucosa atrophy          | 0.93073 | Alkalosis hypokalaemic          | Metabolism and nutrition disorders              |
| Metabolism and nutrition disorders              | Alkalosis hypokalaemic        | 0.93073 | Chorioretinopathy               | Eye disorders                                   |
| Metabolism and nutrition disorders              | Alkalosis hypokalaemic        | 0.93073 | Posterior capsule opacification | Eye disorders                                   |
| Respiratory, thoracic and mediastinal disorders | Laryngeal obstruction         | 0.93073 | Alkalosis hypokalaemic          | Metabolism and nutrition disorders              |
| Metabolism and nutrition disorders              | Alkalosis hypokalaemic        | 0.93073 | Scoliosis                       | Musculoskeletal and connective tissue disorders |
| Injury, poisoning and procedural complications  | Tendon injury                 | 0.93073 | Alkalosis hypokalaemic          | Metabolism and nutrition disorders              |

| Basis data for network                          |                                        |         |                                        |                                                      |
|-------------------------------------------------|----------------------------------------|---------|----------------------------------------|------------------------------------------------------|
| SOC1                                            | AE1                                    | score   | AE2                                    | SOC2                                                 |
| Investigations                                  | Blood chromium decreased               | 0.93073 | Alkalosis hypokalaemic                 | Metabolism and nutrition disorders                   |
| Eye disorders                                   | Scleromalacia                          | 0.93073 | Alkalosis hypokalaemic                 | Metabolism and nutrition disorders                   |
| Nervous system disorders                        | Clumsiness                             | 0.93063 | Drug withdrawal syndrome neonatal      | General disorders and administration site conditions |
| Cardiac disorders                               | Grey syndrome neonatal                 | 0.93050 | Cerebral venous thrombosis             | Nervous system disorders                             |
| Respiratory, thoracic and mediastinal disorders | Aspiration                             | 0.93046 | Meige's syndrome                       | Nervous system disorders                             |
| Respiratory, thoracic and mediastinal disorders | Aspiration                             | 0.93046 | Antiphospholipid syndrome              | Immune system disorders                              |
| Metabolism and nutrition disorders              | Alkalosis hypokalaemic                 | 0.93044 | Hypertrophic cardiomyopathy            | Cardiac disorders                                    |
| Investigations                                  | Antithrombin III decreased             | 0.93039 | Thyroxin binding globulin increased    | Investigations                                       |
| Nervous system disorders                        | Loss of proprioception                 | 0.93037 | Lhermitte's sign                       | Nervous system disorders                             |
| Congenital, familial and genetic disorders      | Limb reduction defect                  | 0.93021 | Retinal pigmentation                   | Eye disorders                                        |
| Psychiatric disorders                           | Phobia of driving                      | 0.92965 | Antisocial behaviour                   | Psychiatric disorders                                |
| Nervous system disorders                        | Facial spasm                           | 0.92962 | Sperm count increased                  | Investigations                                       |
| Endocrine disorders                             | Secondary adrenocortical insufficiency | 0.92962 | Chorioretinopathy                      | Eye disorders                                        |
| Endocrine disorders                             | Secondary adrenocortical insufficiency | 0.92962 | Posterior capsule opacification        | Eye disorders                                        |
| Respiratory, thoracic and mediastinal disorders | Nasal mucosa atrophy                   | 0.92962 | Secondary adrenocortical insufficiency | Endocrine disorders                                  |
| Musculoskeletal and connective tissue disorders | Scoliosis                              | 0.92962 | Secondary adrenocortical insufficiency | Endocrine disorders                                  |
| Endocrine disorders                             | Secondary adrenocortical insufficiency | 0.92962 | Scleromalacia                          | Eye disorders                                        |
| Endocrine disorders                             | Secondary adrenocortical insufficiency | 0.92962 | Laryngeal obstruction                  | Respiratory, thoracic and mediastinal disorders      |
| Endocrine disorders                             | Secondary adrenocortical insufficiency | 0.92962 | Tendon injury                          | Injury, poisoning and procedural complications       |
| Endocrine disorders                             | Secondary adrenocortical insufficiency | 0.92962 | Blood chromium decreased               | Investigations                                       |

| Basis data for network                                              |                                             |         |                                    |                                                      |
|---------------------------------------------------------------------|---------------------------------------------|---------|------------------------------------|------------------------------------------------------|
| SOC1                                                                | AE1                                         | score   | AE2                                | SOC2                                                 |
| Reproductive system and breast disorders                            | Vaginal burning sensation                   | 0.92955 | Vaginal odour                      | Reproductive system and breast disorders             |
| Respiratory, thoracic and mediastinal disorders                     | Laryngeal disorder                          | 0.92918 | Pregnancy test false positive      | Investigations                                       |
| Investigations                                                      | Liver function test                         | 0.92914 | Facial spasm                       | Nervous system disorders                             |
| Musculoskeletal and connective tissue disorders                     | Osteochondrosis                             | 0.92904 | Femur fracture                     | Injury, poisoning and procedural complications       |
| Musculoskeletal and connective tissue disorders                     | Osteochondrosis                             | 0.92904 | Cold agglutinins positive          | Investigations                                       |
| Musculoskeletal and connective tissue disorders                     | Osteochondrosis                             | 0.92904 | Trigger finger                     | Musculoskeletal and connective tissue disorders      |
| Psychiatric disorders                                               | Stereotypic movement disorder               | 0.92897 | Tourette's disorder                | Congenital, familial and genetic disorders           |
| Infections and infestations                                         | Corneal infection                           | 0.92895 | Myopathy steroid                   | Musculoskeletal and connective tissue disorders      |
| Neoplasms benign, malignant and unspecified (incl cysts and polyps) | Fibroma                                     | 0.92865 | Cleft lip and palate               | Congenital, familial and genetic disorders           |
| Neoplasms benign, malignant and unspecified (incl cysts and polyps) | Fibromatosis                                | 0.92865 | Cleft lip and palate               | Congenital, familial and genetic disorders           |
| Psychiatric disorders                                               | Breath holding                              | 0.92851 | Neuromuscular toxicity             | Nervous system disorders                             |
| Skin and subcutaneous tissue disorders                              | Fat atrophy                                 | 0.92845 | Hypertrophic cardiomyopathy        | Cardiac disorders                                    |
| Eye disorders                                                       | Lens disorder                               | 0.92837 | Blood zinc decreased               | Investigations                                       |
| Skin and subcutaneous tissue disorders                              | Skin atrophy                                | 0.92835 | Skin hypopigmentation              | Skin and subcutaneous tissue disorders               |
| Cardiac disorders                                                   | Myocardial rupture                          | 0.92826 | Injection site abscess sterile     | General disorders and administration site conditions |
| Injury, poisoning and procedural complications                      | Spinal fracture                             | 0.92819 | Myopathy steroid                   | Musculoskeletal and connective tissue disorders      |
| Musculoskeletal and connective tissue disorders                     | Neuropathic arthropathy                     | 0.92818 | Adrenocortical insufficiency acute | Endocrine disorders                                  |
| Investigations                                                      | Blood thyroid stimulating hormone increased | 0.92815 | Injection site extravasation       | General disorders and administration site conditions |
| Endocrine disorders                                                 | Secondary adrenocortical insufficiency      | 0.92788 | Adrenocortical insufficiency acute | Endocrine disorders                                  |
| Skin and subcutaneous tissue disorders                              | Panniculitis                                | 0.92788 | Grey syndrome neonatal             | Cardiac disorders                                    |

| Basis data for network                          |                               |         |                                        |                                                 |
|-------------------------------------------------|-------------------------------|---------|----------------------------------------|-------------------------------------------------|
| SOC1                                            | AE1                           | score   | AE2                                    | SOC2                                            |
| Injury, poisoning and procedural complications  | Spinal compression fracture   | 0.92783 | Hypertrophic cardiomyopathy            | Cardiac disorders                               |
| Respiratory, thoracic and mediastinal disorders | Laryngeal disorder            | 0.92766 | Retrograde ejaculation                 | Reproductive system and breast disorders        |
| Injury, poisoning and procedural complications  | Spinal fracture               | 0.92755 | Secondary adrenocortical insufficiency | Endocrine disorders                             |
| Investigations                                  | Liver function test           | 0.92745 | Blood growth hormone increased         | Investigations                                  |
| Infections and infestations                     | Oropharyngeal candidiasis     | 0.92744 | Nasal septum disorder                  | Respiratory, thoracic and mediastinal disorders |
| Investigations                                  | Sperm count increased         | 0.92732 | Stereotypic movement disorder          | Psychiatric disorders                           |
| Gastrointestinal disorders                      | Mesenteric artery embolism    | 0.92689 | Consciousness fluctuating              | Nervous system disorders                        |
| Respiratory, thoracic and mediastinal disorders | Asphyxia                      | 0.92686 | Meige's syndrome                       | Nervous system disorders                        |
| Immune system disorders                         | Antiphospholipid syndrome     | 0.92686 | Asphyxia                               | Respiratory, thoracic and mediastinal disorders |
| Infections and infestations                     | Corneal infection             | 0.92683 | Spinal compression fracture            | Injury, poisoning and procedural complications  |
| Injury, poisoning and procedural complications  | Tendon injury                 | 0.92682 | Myopathy steroid                       | Musculoskeletal and connective tissue disorders |
| Musculoskeletal and connective tissue disorders | Scoliosis                     | 0.92682 | Myopathy steroid                       | Musculoskeletal and connective tissue disorders |
| Musculoskeletal and connective tissue disorders | Myopathy steroid              | 0.92682 | Scleromalacia                          | Eye disorders                                   |
| Musculoskeletal and connective tissue disorders | Myopathy steroid              | 0.92682 | Laryngeal obstruction                  | Respiratory, thoracic and mediastinal disorders |
| Musculoskeletal and connective tissue disorders | Myopathy steroid              | 0.92682 | Posterior capsule opacification        | Eye disorders                                   |
| Eye disorders                                   | Chorioretinopathy             | 0.92682 | Myopathy steroid                       | Musculoskeletal and connective tissue disorders |
| Respiratory, thoracic and mediastinal disorders | Nasal mucosa atrophy          | 0.92682 | Myopathy steroid                       | Musculoskeletal and connective tissue disorders |
| Investigations                                  | Blood chromium decreased      | 0.92682 | Myopathy steroid                       | Musculoskeletal and connective tissue disorders |
| Psychiatric disorders                           | Stereotypic movement disorder | 0.92681 | Liver function test                    | Investigations                                  |
| Metabolism and nutrition disorders              | Catabolic state               | 0.92654 | Secondary adrenocortical insufficiency | Endocrine disorders                             |

| Basis data for network                          |                                        |         |                                        |                                                 |
|-------------------------------------------------|----------------------------------------|---------|----------------------------------------|-------------------------------------------------|
| SOC1                                            | AE1                                    | score   | AE2                                    | SOC2                                            |
| Reproductive system and breast disorders        | Cervical discharge                     | 0.92620 | Chloasma                               | Skin and subcutaneous tissue disorders          |
| Investigations                                  | Blood growth hormone increased         | 0.92617 | Laryngeal disorder                     | Respiratory, thoracic and mediastinal disorders |
| Endocrine disorders                             | Secondary adrenocortical insufficiency | 0.92609 | Corneal infection                      | Infections and infestations                     |
| Injury, poisoning and procedural complications  | Spinal compression fracture            | 0.92601 | Spinal fracture                        | Injury, poisoning and procedural complications  |
| Nervous system disorders                        | Toxic induced encephalopathy           | 0.92601 | Tri-iodothyronine decreased            | Investigations                                  |
| Nervous system disorders                        | Aura                                   | 0.92601 | Tri-iodothyronine decreased            | Investigations                                  |
| Investigations                                  | Tri-iodothyronine decreased            | 0.92601 | Blood testosterone free increased      | Investigations                                  |
| Investigations                                  | Tri-iodothyronine decreased            | 0.92601 | Urinary tract pain                     | Renal and urinary disorders                     |
| Metabolism and nutrition disorders              | Oligodipsia                            | 0.92601 | Tri-iodothyronine decreased            | Investigations                                  |
| Investigations                                  | Tri-iodothyronine decreased            | 0.92601 | Atonic seizures                        | Nervous system disorders                        |
| Investigations                                  | Tri-iodothyronine decreased            | 0.92601 | Histone antibody positive              | Investigations                                  |
| Blood and lymphatic system disorders            | Myeloid maturation arrest              | 0.92601 | Tri-iodothyronine decreased            | Investigations                                  |
| Investigations                                  | Tri-iodothyronine decreased            | 0.92601 | Periarticular disorder                 | Musculoskeletal and connective tissue disorders |
| Cardiac disorders                               | Grey syndrome neonatal                 | 0.92600 | Secondary adrenocortical insufficiency | Endocrine disorders                             |
| Injury, poisoning and procedural complications  | Spinal compression fracture            | 0.92582 | Chorioretinopathy                      | Eye disorders                                   |
| Musculoskeletal and connective tissue disorders | Scoliosis                              | 0.92582 | Spinal compression fracture            | Injury, poisoning and procedural complications  |
| Injury, poisoning and procedural complications  | Spinal compression fracture            | 0.92582 | Tendon injury                          | Injury, poisoning and procedural complications  |
| Eye disorders                                   | Scleromalacia                          | 0.92582 | Spinal compression fracture            | Injury, poisoning and procedural complications  |
| Investigations                                  | Blood chromium decreased               | 0.92582 | Spinal compression fracture            | Injury, poisoning and procedural complications  |
| Respiratory, thoracic and mediastinal disorders | Laryngeal obstruction                  | 0.92582 | Spinal compression fracture            | Injury, poisoning and procedural complications  |

| Basis data for network                          |                                    |         |                                |                                                      |
|-------------------------------------------------|------------------------------------|---------|--------------------------------|------------------------------------------------------|
| SOC1                                            | AE1                                | score   | AE2                            | SOC2                                                 |
| Injury, poisoning and procedural complications  | Spinal compression fracture        | 0.92582 | Nasal mucosa atrophy           | Respiratory, thoracic and mediastinal disorders      |
| Eye disorders                                   | Posterior capsule opacification    | 0.92582 | Spinal compression fracture    | Injury, poisoning and procedural complications       |
| Skin and subcutaneous tissue disorders          | Skin fragility                     | 0.92574 | Cataract subcapsular           | Eye disorders                                        |
| Blood and lymphatic system disorders            | Hypercoagulation                   | 0.92551 | Spinal fracture                | Injury, poisoning and procedural complications       |
| Psychiatric disorders                           | Stereotypic movement disorder      | 0.92539 | Laryngeal disorder             | Respiratory, thoracic and mediastinal disorders      |
| Investigations                                  | Liver function test                | 0.92526 | Laryngeal disorder             | Respiratory, thoracic and mediastinal disorders      |
| Infections and infestations                     | Oropharyngeal candidiasis          | 0.92521 | Ocular hypertension            | Eye disorders                                        |
| Psychiatric disorders                           | Obsessive-compulsive disorder      | 0.92519 | Sperm count increased          | Investigations                                       |
| Endocrine disorders                             | Adrenocortical insufficiency acute | 0.92511 | Injection site abscess sterile | General disorders and administration site conditions |
| Psychiatric disorders                           | Stereotypic movement disorder      | 0.92497 | Limb reduction defect          | Congenital, familial and genetic disorders           |
| Respiratory, thoracic and mediastinal disorders | Aspiration                         | 0.92494 | Intestinal dilatation          | Gastrointestinal disorders                           |
| Metabolism and nutrition disorders              | Alkalosis hypokalaemic             | 0.92494 | Catabolic state                | Metabolism and nutrition disorders                   |
| Respiratory, thoracic and mediastinal disorders | Asphyxia                           | 0.92456 | Intestinal dilatation          | Gastrointestinal disorders                           |
| Metabolism and nutrition disorders              | Alkalosis hypokalaemic             | 0.92434 | Grey syndrome neonatal         | Cardiac disorders                                    |
| Endocrine disorders                             | Hypopituitarism                    | 0.92379 | Cataract subcapsular           | Eye disorders                                        |
| Blood and lymphatic system disorders            | Hypercoagulation                   | 0.92377 | Corneal infection              | Infections and infestations                          |
| Eye disorders                                   | Cataract subcapsular               | 0.92371 | Injection site abscess sterile | General disorders and administration site conditions |
| Injury, poisoning and procedural complications  | Hip fracture                       | 0.92369 | Grey syndrome neonatal         | Cardiac disorders                                    |
| Investigations                                  | Blood growth hormone increased     | 0.92354 | Limb reduction defect          | Congenital, familial and genetic disorders           |
| Congenital, familial and genetic disorders      | Tooth hypoplasia                   | 0.92332 | Biopsy thyroid gland abnormal  | Investigations                                       |

| Basis data for network                                              |                                             |         |                                         |                                                                     |
|---------------------------------------------------------------------|---------------------------------------------|---------|-----------------------------------------|---------------------------------------------------------------------|
| SOC1                                                                | AE1                                         | score   | AE2                                     | SOC2                                                                |
| Investigations                                                      | Cardiac index decreased                     | 0.92305 | Pulmonary arterial pressure increased   | Investigations                                                      |
| Cardiac disorders                                                   | Cardiac asthma                              | 0.92305 | Cardiac index decreased                 | Investigations                                                      |
| Skin and subcutaneous tissue disorders                              | Palmar-plantar erythrodysaesthesia syndrome | 0.92298 | Ovarian failure                         | Reproductive system and breast disorders                            |
| Endocrine disorders                                                 | Adrenocortical insufficiency acute          | 0.92276 | Skin fragility                          | Skin and subcutaneous tissue disorders                              |
| Eye disorders                                                       | Retinal pigment epitheliopathy              | 0.92275 | Dacryocystitis infective                | Infections and infestations                                         |
| Investigations                                                      | Medication residue                          | 0.92275 | Retinal pigment epitheliopathy          | Eye disorders                                                       |
| Eye disorders                                                       | Retinal pigment epitheliopathy              | 0.92275 | Crystal urine present                   | Investigations                                                      |
| Gastrointestinal disorders                                          | Splenic artery aneurysm                     | 0.92268 | Rectal ulcer                            | Gastrointestinal disorders                                          |
| Gastrointestinal disorders                                          | Rectal stenosis                             | 0.92268 | Rectal ulcer                            | Gastrointestinal disorders                                          |
| Endocrine disorders                                                 | Adrenocortical insufficiency acute          | 0.92265 | Myocardial rupture                      | Cardiac disorders                                                   |
| Investigations                                                      | Coagulation factor VIII level increased     | 0.92252 | Vaginal cancer                          | Neoplasms benign, malignant and unspecified (incl cysts and polyps) |
| Investigations                                                      | Alpha-1 anti-trypsin increased              | 0.92252 | Coagulation factor VIII level increased | Investigations                                                      |
| Investigations                                                      | Coagulation factor VIII level increased     | 0.92252 | Colorectal cancer                       | Neoplasms benign, malignant and unspecified (incl cysts and polyps) |
| Investigations                                                      | Coagulation factor VIII level increased     | 0.92252 | Coagulation factor IX level increased   | Investigations                                                      |
| Investigations                                                      | Coagulation factor XII level increased      | 0.92252 | Coagulation factor VIII level increased | Investigations                                                      |
| Investigations                                                      | Coagulation factor VIII level increased     | 0.92252 | Plasminogen increased                   | Investigations                                                      |
| Neoplasms benign, malignant and unspecified (incl cysts and polyps) | Adenosquamous carcinoma of the cervix       | 0.92252 | Coagulation factor VIII level increased | Investigations                                                      |
| Investigations                                                      | Coagulation factor VIII level increased     | 0.92252 | Breast cyst                             | Reproductive system and breast disorders                            |
| Investigations                                                      | Coagulation factor VIII level increased     | 0.92252 | Coagulation factor X level increased    | Investigations                                                      |
| Investigations                                                      | Ceruloplasmin increased                     | 0.92252 | Coagulation factor VIII level increased | Investigations                                                      |



| Basis data for network                                              |                                         |         |                                         |                                                      |
|---------------------------------------------------------------------|-----------------------------------------|---------|-----------------------------------------|------------------------------------------------------|
| SOC1                                                                | AE1                                     | score   | AE2                                     | SOC2                                                 |
| Neoplasms benign, malignant and unspecified (incl cysts and polyps) | Testis cancer                           | 0.92252 | Coagulation factor VIII level increased | Investigations                                       |
| Investigations                                                      | Coagulation factor VIII level increased | 0.92252 | Coagulation factor VII level increased  | Investigations                                       |
| Gastrointestinal disorders                                          | Rectal stenosis                         | 0.92245 | Mesenteric occlusion                    | Gastrointestinal disorders                           |
| Gastrointestinal disorders                                          | Splenic artery aneurysm                 | 0.92245 | Mesenteric occlusion                    | Gastrointestinal disorders                           |
| Skin and subcutaneous tissue disorders                              | Skin fragility                          | 0.92227 | Injection site abscess sterile          | General disorders and administration site conditions |
| Congenital, familial and genetic disorders                          | Limb reduction defect                   | 0.92219 | Laryngeal disorder                      | Respiratory, thoracic and mediastinal disorders      |
| Investigations                                                      | Blood growth hormone increased          | 0.92214 | Facial spasm                            | Nervous system disorders                             |
| Ear and labyrinth disorders                                         | Deafness permanent                      | 0.92190 | Hyperuricosuria                         | Renal and urinary disorders                          |
| Skin and subcutaneous tissue disorders                              | Panniculitis                            | 0.92159 | Adrenocortical insufficiency acute      | Endocrine disorders                                  |
| Vascular disorders                                                  | Arterial stenosis                       | 0.92141 | Gastrointestinal ischaemia              | Gastrointestinal disorders                           |
| General disorders and administration site conditions                | Injection site nodule                   | 0.92129 | Aspiration                              | Respiratory, thoracic and mediastinal disorders      |
| Ear and labyrinth disorders                                         | Tympanic membrane perforation           | 0.92123 | Eye degenerative disorder               | Eye disorders                                        |
| Musculoskeletal and connective tissue disorders                     | Muscle contracture                      | 0.92123 | Tympanic membrane perforation           | Ear and labyrinth disorders                          |
| Ear and labyrinth disorders                                         | Eustachian tube dysfunction             | 0.92123 | Tympanic membrane perforation           | Ear and labyrinth disorders                          |
| Ear and labyrinth disorders                                         | Tympanic membrane perforation           | 0.92123 | Blood glucose fluctuation               | Investigations                                       |
| Endocrine disorders                                                 | Oestrogen deficiency                    | 0.92123 | Tympanic membrane perforation           | Ear and labyrinth disorders                          |
| Ear and labyrinth disorders                                         | Tympanic membrane perforation           | 0.92123 | Lip haemorrhage                         | Gastrointestinal disorders                           |
| Ear and labyrinth disorders                                         | Tympanic membrane perforation           | 0.92123 | Capillary fragility increased           | Investigations                                       |
| Respiratory, thoracic and mediastinal disorders                     | Pulmonary thrombosis                    | 0.92123 | Tympanic membrane perforation           | Ear and labyrinth disorders                          |
| Ear and labyrinth disorders                                         | Tympanic membrane perforation           | 0.92123 | Diabetic retinopathy                    | Eye disorders                                        |

| Basis data for network                          |                                     |         |                                      |                                                 |
|-------------------------------------------------|-------------------------------------|---------|--------------------------------------|-------------------------------------------------|
| SOC1                                            | AE1                                 | score   | AE2                                  | SOC2                                            |
| Ear and labyrinth disorders                     | Tympanic membrane perforation       | 0.92123 | Neck mass                            | Musculoskeletal and connective tissue disorders |
| Endocrine disorders                             | Cushingoid                          | 0.92120 | Adrenocortical insufficiency acute   | Endocrine disorders                             |
| Musculoskeletal and connective tissue disorders | Myopathy steroid                    | 0.92118 | Catabolic state                      | Metabolism and nutrition disorders              |
| Eye disorders                                   | Retinal pigmentation                | 0.92102 | Sperm count increased                | Investigations                                  |
| Reproductive system and breast disorders        | Atrophic vulvovaginitis             | 0.92089 | Perianal erythema                    | Gastrointestinal disorders                      |
| Musculoskeletal and connective tissue disorders | Myopathy steroid                    | 0.92079 | Grey syndrome neonatal               | Cardiac disorders                               |
| Skin and subcutaneous tissue disorders          | Skin striae                         | 0.92074 | Skin atrophy                         | Skin and subcutaneous tissue disorders          |
| Reproductive system and breast disorders        | Aspermia                            | 0.92048 | Aspiration                           | Respiratory, thoracic and mediastinal disorders |
| Infections and infestations                     | Lung abscess                        | 0.92043 | Acoustic stimulation tests abnormal  | Investigations                                  |
| Investigations                                  | Acoustic stimulation tests abnormal | 0.92043 | Haemophilus sepsis                   | Infections and infestations                     |
| Infections and infestations                     | Pulmonary tuberculosis              | 0.92043 | Acoustic stimulation tests abnormal  | Investigations                                  |
| Skin and subcutaneous tissue disorders          | Skin maceration                     | 0.92036 | Hypothalamo-pituitary disorders      | Endocrine disorders                             |
| Musculoskeletal and connective tissue disorders | Myopathy steroid                    | 0.92033 | Myocardial rupture                   | Cardiac disorders                               |
| Respiratory, thoracic and mediastinal disorders | Aspiration                          | 0.92002 | Blood antidiuretic hormone increased | Investigations                                  |
| Endocrine disorders                             | Virilism                            | 0.91998 | Tendon injury                        | Injury, poisoning and procedural complications  |
| Endocrine disorders                             | Virilism                            | 0.91998 | Chorioretinopathy                    | Eye disorders                                   |
| Respiratory, thoracic and mediastinal disorders | Nasal mucosa atrophy                | 0.91998 | Virilism                             | Endocrine disorders                             |
| Endocrine disorders                             | Virilism                            | 0.91998 | Scoliosis                            | Musculoskeletal and connective tissue disorders |
| Eye disorders                                   | Posterior capsule opacification     | 0.91998 | Virilism                             | Endocrine disorders                             |
| Investigations                                  | Blood chromium decreased            | 0.91998 | Virilism                             | Endocrine disorders                             |

| Basis data for network                                              |                                             |         |                                             |                                                                     |
|---------------------------------------------------------------------|---------------------------------------------|---------|---------------------------------------------|---------------------------------------------------------------------|
| SOC1                                                                | AE1                                         | score   | AE2                                         | SOC2                                                                |
| Eye disorders                                                       | Scleromalacia                               | 0.91998 | Virilism                                    | Endocrine disorders                                                 |
| Endocrine disorders                                                 | Virilism                                    | 0.91998 | Laryngeal obstruction                       | Respiratory, thoracic and mediastinal disorders                     |
| Skin and subcutaneous tissue disorders                              | Lichenification                             | 0.91994 | Pyogenic granuloma                          | Neoplasms benign, malignant and unspecified (incl cysts and polyps) |
| Neoplasms benign, malignant and unspecified (incl cysts and polyps) | Pyogenic granuloma                          | 0.91994 | Haptoglobin decreased                       | Investigations                                                      |
| Investigations                                                      | Blood iron increased                        | 0.91994 | Pyogenic granuloma                          | Neoplasms benign, malignant and unspecified (incl cysts and polyps) |
| Neoplasms benign, malignant and unspecified (incl cysts and polyps) | Pyogenic granuloma                          | 0.91994 | Haptoglobin increased                       | Investigations                                                      |
| Eye disorders                                                       | Madarosis                                   | 0.91994 | Pyogenic granuloma                          | Neoplasms benign, malignant and unspecified (incl cysts and polyps) |
| Neoplasms benign, malignant and unspecified (incl cysts and polyps) | Pyogenic granuloma                          | 0.91994 | Senile ankylosing vertebral hyperostosis    | Musculoskeletal and connective tissue disorders                     |
| Neoplasms benign, malignant and unspecified (incl cysts and polyps) | Lymphoma cutis                              | 0.91994 | Pyogenic granuloma                          | Neoplasms benign, malignant and unspecified (incl cysts and polyps) |
| Musculoskeletal and connective tissue disorders                     | Intervertebral disc space narrowing         | 0.91994 | Pyogenic granuloma                          | Neoplasms benign, malignant and unspecified (incl cysts and polyps) |
| Congenital, familial and genetic disorders                          | Supernumerary nipple                        | 0.91994 | Pyogenic granuloma                          | Neoplasms benign, malignant and unspecified (incl cysts and polyps) |
| Congenital, familial and genetic disorders                          | Cryptorchism                                | 0.91994 | Pyogenic granuloma                          | Neoplasms benign, malignant and unspecified (incl cysts and polyps) |
| Metabolism and nutrition disorders                                  | Catabolic state                             | 0.91989 | Spinal compression fracture                 | Injury, poisoning and procedural complications                      |
| Investigations                                                      | Nitrogen balance negative                   | 0.91988 | Skin fragility                              | Skin and subcutaneous tissue disorders                              |
| Investigations                                                      | Blood growth hormone increased              | 0.91981 | Retinal pigmentation                        | Eye disorders                                                       |
| Investigations                                                      | Blood antidiuretic hormone increased        | 0.91974 | Asphyxia                                    | Respiratory, thoracic and mediastinal disorders                     |
| Skin and subcutaneous tissue disorders                              | Palmar-plantar erythrodysaesthesia syndrome | 0.91969 | Blood thyroid stimulating hormone increased | Investigations                                                      |
| Congenital, familial and genetic disorders                          | Congenital spinal cord anomaly              | 0.91951 | Neutrophil toxic granulation present        | Investigations                                                      |
| Eye disorders                                                       | Cataract subcapsular                        | 0.91941 | Nitrogen balance negative                   | Investigations                                                      |
| Eye disorders                                                       | Iris cyst                                   | 0.91916 | Ciliary hyperaemia                          | Eye disorders                                                       |

| Basis data for network                          |                             |         |                                      |                                                      |
|-------------------------------------------------|-----------------------------|---------|--------------------------------------|------------------------------------------------------|
| SOC1                                            | AE1                         | score   | AE2                                  | SOC2                                                 |
| Gastrointestinal disorders                      | Tongue spasm                | 0.91902 | Cerebellar artery occlusion          | Nervous system disorders                             |
| Nervous system disorders                        | Myotonia                    | 0.91895 | Bipolar I disorder                   | Psychiatric disorders                                |
| Investigations                                  | Megaloblasts increased      | 0.91890 | Allergic oedema                      | Immune system disorders                              |
| Skin and subcutaneous tissue disorders          | Skin atrophy                | 0.91877 | Hypothalamo-pituitary disorders      | Endocrine disorders                                  |
| Injury, poisoning and procedural complications  | Anastomotic ulcer           | 0.91872 | Urinary nitrogen increased           | Investigations                                       |
| Hepatobiliary disorders                         | Gallbladder pain            | 0.91872 | Urinary nitrogen increased           | Investigations                                       |
| Cardiac disorders                               | Hypertrophic cardiomyopathy | 0.91867 | Injection site abscess sterile       | General disorders and administration site conditions |
| Eye disorders                                   | Chorioretinitis             | 0.91866 | Lymph node pain                      | Blood and lymphatic system disorders                 |
| Eye disorders                                   | Chorioretinitis             | 0.91866 | Onchocerciasis                       | Infections and infestations                          |
| Eye disorders                                   | Anterior chamber disorder   | 0.91866 | Chorioretinitis                      | Eye disorders                                        |
| Eye disorders                                   | Chorioretinitis             | 0.91866 | Choroiditis                          | Eye disorders                                        |
| Nervous system disorders                        | Facial spasm                | 0.91866 | Laryngeal disorder                   | Respiratory, thoracic and mediastinal disorders      |
| Congenital, familial and genetic disorders      | Tooth hypoplasia            | 0.91842 | Fontanelle bulging                   | Nervous system disorders                             |
| Musculoskeletal and connective tissue disorders | Neuropathic arthropathy     | 0.91784 | Myopathy steroid                     | Musculoskeletal and connective tissue disorders      |
| Reproductive system and breast disorders        | Vulval oedema               | 0.91783 | Nonspecific reaction                 | General disorders and administration site conditions |
| Reproductive system and breast disorders        | Vulval oedema               | 0.91783 | Bloody discharge                     | General disorders and administration site conditions |
| Investigations                                  | Immunoglobulins abnormal    | 0.91759 | Blood antidiuretic hormone decreased | Investigations                                       |
| Investigations                                  | Immunoglobulins abnormal    | 0.91759 | Purple glove syndrome                | Musculoskeletal and connective tissue disorders      |
| Endocrine disorders                             | Acromegaly                  | 0.91759 | Immunoglobulins abnormal             | Investigations                                       |
| Gastrointestinal disorders                      | Dyskinesia oesophageal      | 0.91737 | Aspiration                           | Respiratory, thoracic and mediastinal disorders      |

| Basis data for network                          |                          |         |                                        |                                                 |
|-------------------------------------------------|--------------------------|---------|----------------------------------------|-------------------------------------------------|
| SOC1                                            | AE1                      | score   | AE2                                    | SOC2                                            |
| Metabolism and nutrition disorders              | Hypervitaminosis A       | 0.91737 | Sticky skin                            | Skin and subcutaneous tissue disorders          |
| Psychiatric disorders                           | Antisocial behaviour     | 0.91702 | Clumsiness                             | Nervous system disorders                        |
| Respiratory, thoracic and mediastinal disorders | Laryngeal disorder       | 0.91637 | Retinal pigmentation                   | Eye disorders                                   |
| Respiratory, thoracic and mediastinal disorders | Asphyxia                 | 0.91629 | Aspermia                               | Reproductive system and breast disorders        |
| Nervous system disorders                        | Loss of proprioception   | 0.91629 | Hepatic vein occlusion                 | Hepatobiliary disorders                         |
| Respiratory, thoracic and mediastinal disorders | Dysaesthesia pharynx     | 0.91629 | Loss of proprioception                 | Nervous system disorders                        |
| Respiratory, thoracic and mediastinal disorders | Oropharyngeal spasm      | 0.91629 | Loss of proprioception                 | Nervous system disorders                        |
| Endocrine disorders                             | Hypopituitarism          | 0.91599 | Skin fragility                         | Skin and subcutaneous tissue disorders          |
| Metabolism and nutrition disorders              | Carnitine deficiency     | 0.91592 | Coarctation of the aorta               | Congenital, familial and genetic disorders      |
| Psychiatric disorders                           | Pseudodementia           | 0.91592 | Cerebral atrophy                       | Nervous system disorders                        |
| Congenital, familial and genetic disorders      | Coarctation of the aorta | 0.91592 | Bleeding time abnormal                 | Investigations                                  |
| Metabolism and nutrition disorders              | Carnitine deficiency     | 0.91592 | Cerebral atrophy                       | Nervous system disorders                        |
| Congenital, familial and genetic disorders      | Porencephaly             | 0.91592 | Bleeding time abnormal                 | Investigations                                  |
| Nervous system disorders                        | Cerebral atrophy         | 0.91592 | Bleeding time abnormal                 | Investigations                                  |
| Congenital, familial and genetic disorders      | Coarctation of the aorta | 0.91592 | Pseudodementia                         | Psychiatric disorders                           |
| Metabolism and nutrition disorders              | Carnitine deficiency     | 0.91592 | Porencephaly                           | Congenital, familial and genetic disorders      |
| Congenital, familial and genetic disorders      | Porencephaly             | 0.91592 | Pseudodementia                         | Psychiatric disorders                           |
| Eye disorders                                   | Conjunctival bleb        | 0.91574 | Neuropathic arthropathy                | Musculoskeletal and connective tissue disorders |
| Cardiac disorders                               | Myocardial rupture       | 0.91574 | Alkalosis hypokalaemic                 | Metabolism and nutrition disorders              |
| Metabolism and nutrition disorders              | Hypercatabolism          | 0.91561 | Secondary adrenocortical insufficiency | Endocrine disorders                             |

| Basis data for network                          |                                        |         |                                             |                                                 |
|-------------------------------------------------|----------------------------------------|---------|---------------------------------------------|-------------------------------------------------|
| SOC1                                            | AE1                                    | score   | AE2                                         | SOC2                                            |
| Endocrine disorders                             | Secondary adrenocortical insufficiency | 0.91551 | Cushingoid                                  | Endocrine disorders                             |
| Metabolism and nutrition disorders              | Hypercatabolism                        | 0.91489 | Myopathy steroid                            | Musculoskeletal and connective tissue disorders |
| Investigations                                  | Blood oestrogen increased              | 0.91487 | Global amnesia                              | Nervous system disorders                        |
| Infections and infestations                     | Encephalitis herpes                    | 0.91487 | Global amnesia                              | Nervous system disorders                        |
| Respiratory, thoracic and mediastinal disorders | Acute respiratory failure              | 0.91483 | Meige's syndrome                            | Nervous system disorders                        |
| Immune system disorders                         | Antiphospholipid syndrome              | 0.91483 | Acute respiratory failure                   | Respiratory, thoracic and mediastinal disorders |
| Cardiac disorders                               | Myocardial rupture                     | 0.91478 | Spinal compression fracture                 | Injury, poisoning and procedural complications  |
| Metabolism and nutrition disorders              | Alkalosis hypokalaemic                 | 0.91478 | Hypercatabolism                             | Metabolism and nutrition disorders              |
| Metabolism and nutrition disorders              | Hypercatabolism                        | 0.91473 | Fat atrophy                                 | Skin and subcutaneous tissue disorders          |
| Cardiac disorders                               | Grey syndrome neonatal                 | 0.91463 | Hypercoagulation                            | Blood and lymphatic system disorders            |
| Injury, poisoning and procedural complications  | Spinal compression fracture            | 0.91441 | Grey syndrome neonatal                      | Cardiac disorders                               |
| Skin and subcutaneous tissue disorders          | Skin striae                            | 0.91433 | Hypothalamo-pituitary disorders             | Endocrine disorders                             |
| Nervous system disorders                        | Trigeminal nerve disorder              | 0.91401 | Oropharyngeal candidiasis                   | Infections and infestations                     |
| Psychiatric disorders                           | Obsessive-compulsive disorder          | 0.91386 | Antiphospholipid syndrome                   | Immune system disorders                         |
| Nervous system disorders                        | Meige's syndrome                       | 0.91386 | Obsessive-compulsive disorder               | Psychiatric disorders                           |
| Gastrointestinal disorders                      | Splenic artery aneurysm                | 0.91380 | Carotid artery disease                      | Nervous system disorders                        |
| Gastrointestinal disorders                      | Rectal stenosis                        | 0.91380 | Carotid artery disease                      | Nervous system disorders                        |
| Respiratory, thoracic and mediastinal disorders | Asphyxia                               | 0.91360 | Dyskinesia oesophageal                      | Gastrointestinal disorders                      |
| Musculoskeletal and connective tissue disorders | Neuropathic arthropathy                | 0.91353 | Alkalosis hypokalaemic                      | Metabolism and nutrition disorders              |
| Reproductive system and breast disorders        | Ovarian failure                        | 0.91343 | Blood thyroid stimulating hormone increased | Investigations                                  |

| Basis data for network                               |                                    |         |                                 |                                                                     |
|------------------------------------------------------|------------------------------------|---------|---------------------------------|---------------------------------------------------------------------|
| SOC1                                                 | AE1                                | score   | AE2                             | SOC2                                                                |
| Congenital, familial and genetic disorders           | Limb reduction defect              | 0.91310 | Aspiration                      | Respiratory, thoracic and mediastinal disorders                     |
| Investigations                                       | Blood creatine phosphokinase       | 0.91296 | Dengue fever                    | Infections and infestations                                         |
| Investigations                                       | Blood creatine phosphokinase       | 0.91296 | Vogt-Koyanagi-Harada syndrome   | Eye disorders                                                       |
| Investigations                                       | Blood creatine phosphokinase       | 0.91296 | Renal tubular atrophy           | Renal and urinary disorders                                         |
| General disorders and administration site conditions | Injection site nodule              | 0.91292 | Acute respiratory failure       | Respiratory, thoracic and mediastinal disorders                     |
| General disorders and administration site conditions | Injection site abscess sterile     | 0.91287 | Hypopituitarism                 | Endocrine disorders                                                 |
| Skin and subcutaneous tissue disorders               | Cutis laxa                         | 0.91280 | Eyelid irritation               | Eye disorders                                                       |
| Skin and subcutaneous tissue disorders               | Cutis laxa                         | 0.91280 | Trichiasis                      | Eye disorders                                                       |
| Skin and subcutaneous tissue disorders               | Fat atrophy                        | 0.91231 | Myocardial rupture              | Cardiac disorders                                                   |
| Endocrine disorders                                  | Adrenocortical insufficiency acute | 0.91228 | Cerebral venous thrombosis      | Nervous system disorders                                            |
| Investigations                                       | Blood chromium decreased           | 0.91185 | Leukoderma                      | Skin and subcutaneous tissue disorders                              |
| Skin and subcutaneous tissue disorders               | Leukoderma                         | 0.91185 | Nasal mucosa atrophy            | Respiratory, thoracic and mediastinal disorders                     |
| Eye disorders                                        | Scleromalacia                      | 0.91185 | Leukoderma                      | Skin and subcutaneous tissue disorders                              |
| Respiratory, thoracic and mediastinal disorders      | Laryngeal obstruction              | 0.91185 | Leukoderma                      | Skin and subcutaneous tissue disorders                              |
| Musculoskeletal and connective tissue disorders      | Scoliosis                          | 0.91185 | Leukoderma                      | Skin and subcutaneous tissue disorders                              |
| Injury, poisoning and procedural complications       | Tendon injury                      | 0.91185 | Leukoderma                      | Skin and subcutaneous tissue disorders                              |
| Skin and subcutaneous tissue disorders               | Leukoderma                         | 0.91185 | Posterior capsule opacification | Eye disorders                                                       |
| Skin and subcutaneous tissue disorders               | Leukoderma                         | 0.91185 | Chorioretinopathy               | Eye disorders                                                       |
| Endocrine disorders                                  | Cushingoid                         | 0.91175 | Nitrogen balance negative       | Investigations                                                      |
| Gastrointestinal disorders                           | Oral mucosal petechiae             | 0.91155 | Leukaemia cutis                 | Neoplasms benign, malignant and unspecified (incl cysts and polyps) |

| Basis data for network                                              |                                   |         |                                             |                                                 |
|---------------------------------------------------------------------|-----------------------------------|---------|---------------------------------------------|-------------------------------------------------|
| SOC1                                                                | AE1                               | score   | AE2                                         | SOC2                                            |
| Gastrointestinal disorders                                          | Oral mucosal petechiae            | 0.91155 | Blastomycosis                               | Infections and infestations                     |
| Infections and infestations                                         | Pneumonia klebsiella              | 0.91155 | Oral mucosal petechiae                      | Gastrointestinal disorders                      |
| Blood and lymphatic system disorders                                | Haemorrhagic disorder             | 0.91153 | Colonic atony                               | Gastrointestinal disorders                      |
| Congenital, familial and genetic disorders                          | Congenital cardiovascular anomaly | 0.91150 | Stress fracture                             | Injury, poisoning and procedural complications  |
| Nervous system disorders                                            | Spinal claudication               | 0.91150 | Congenital cardiovascular anomaly           | Congenital, familial and genetic disorders      |
| Congenital, familial and genetic disorders                          | Cerebral atrophy congenital       | 0.91150 | Congenital cardiovascular anomaly           | Congenital, familial and genetic disorders      |
| Neoplasms benign, malignant and unspecified (incl cysts and polyps) | B-cell lymphoma                   | 0.91150 | Congenital cardiovascular anomaly           | Congenital, familial and genetic disorders      |
| General disorders and administration site conditions                | Injection site nodule             | 0.91142 | Asphyxia                                    | Respiratory, thoracic and mediastinal disorders |
| Musculoskeletal and connective tissue disorders                     | Neuropathic arthropathy           | 0.91138 | Spinal compression fracture                 | Injury, poisoning and procedural complications  |
| Respiratory, thoracic and mediastinal disorders                     | Acute respiratory failure         | 0.91121 | Intestinal dilatation                       | Gastrointestinal disorders                      |
| General disorders and administration site conditions                | Mucosal inflammation              | 0.91114 | Palmar-plantar erythrodysaesthesia syndrome | Skin and subcutaneous tissue disorders          |
| Blood and lymphatic system disorders                                | Hypercoagulation                  | 0.91114 | Virilism                                    | Endocrine disorders                             |
| Nervous system disorders                                            | Global amnesia                    | 0.91108 | Accelerated idioventricular rhythm          | Cardiac disorders                               |
| Eye disorders                                                       | Scleromalacia                     | 0.91097 | Urine calcium increased                     | Investigations                                  |
| Injury, poisoning and procedural complications                      | Tendon injury                     | 0.91097 | Urine calcium increased                     | Investigations                                  |
| Respiratory, thoracic and mediastinal disorders                     | Nasal mucosa atrophy              | 0.91097 | Urine calcium increased                     | Investigations                                  |
| Investigations                                                      | Urine calcium increased           | 0.91097 | Chorioretinopathy                           | Eye disorders                                   |
| Respiratory, thoracic and mediastinal disorders                     | Laryngeal obstruction             | 0.91097 | Urine calcium increased                     | Investigations                                  |
| Investigations                                                      | Urine calcium increased           | 0.91097 | Posterior capsule opacification             | Eye disorders                                   |
| Investigations                                                      | Blood chromium decreased          | 0.91097 | Urine calcium increased                     | Investigations                                  |



| Basis data for network                          |                                            |         |                                              |                                                 |
|-------------------------------------------------|--------------------------------------------|---------|----------------------------------------------|-------------------------------------------------|
| SOC1                                            | AE1                                        | score   | AE2                                          | SOC2                                            |
| Investigations                                  | Urine calcium increased                    | 0.91097 | Scoliosis                                    | Musculoskeletal and connective tissue disorders |
| Skin and subcutaneous tissue disorders          | Skin striae                                | 0.91080 | Heat rash                                    | Skin and subcutaneous tissue disorders          |
| Gastrointestinal disorders                      | Gastrointestinal ischaemia                 | 0.91044 | Mesenteric occlusion                         | Gastrointestinal disorders                      |
| Congenital, familial and genetic disorders      | Congenital hypothyroidism                  | 0.91018 | Paraplegia                                   | Nervous system disorders                        |
| Nervous system disorders                        | Cerebral venous thrombosis                 | 0.91002 | Panniculitis                                 | Skin and subcutaneous tissue disorders          |
| Endocrine disorders                             | Adrenocortical insufficiency acute         | 0.90974 | Hip fracture                                 | Injury, poisoning and procedural complications  |
| Skin and subcutaneous tissue disorders          | Heat rash                                  | 0.90969 | Hypothalamo-pituitary disorders              | Endocrine disorders                             |
| Musculoskeletal and connective tissue disorders | Neuropathic arthropathy                    | 0.90951 | Fat atrophy                                  | Skin and subcutaneous tissue disorders          |
| Cardiac disorders                               | Hypertrophic cardiomyopathy                | 0.90948 | Corneal infection                            | Infections and infestations                     |
| Reproductive system and breast disorders        | Vulval ulceration                          | 0.90931 | Vulvovaginal ulceration                      | Reproductive system and breast disorders        |
| Investigations                                  | Progesterone increased                     | 0.90924 | Blood follicle stimulating hormone decreased | Investigations                                  |
| Investigations                                  | Blood antidiuretic hormone increased       | 0.90899 | Obsessive-compulsive disorder                | Psychiatric disorders                           |
| Nervous system disorders                        | Cerebellar artery occlusion                | 0.90896 | Mesenteric occlusion                         | Gastrointestinal disorders                      |
| Investigations                                  | Spermatozoa progressive motility decreased | 0.90893 | Laryngeal disorder                           | Respiratory, thoracic and mediastinal disorders |
| Skin and subcutaneous tissue disorders          | Leukoderma                                 | 0.90873 | Corneal infection                            | Infections and infestations                     |
| Endocrine disorders                             | Hypopituitarism                            | 0.90843 | Cushingoid                                   | Endocrine disorders                             |
| Respiratory, thoracic and mediastinal disorders | Acute respiratory failure                  | 0.90818 | Blood antidiuretic hormone increased         | Investigations                                  |
| Infections and infestations                     | Corneal infection                          | 0.90813 | Cataract subcapsular                         | Eye disorders                                   |
| Nervous system disorders                        | Cerebral venous thrombosis                 | 0.90812 | Hip fracture                                 | Injury, poisoning and procedural complications  |
| Skin and subcutaneous tissue disorders          | Skin hypopigmentation                      | 0.90795 | Hypothalamo-pituitary disorders              | Endocrine disorders                             |

| Basis data for network                          |                                 |         |                               |                                                                     |
|-------------------------------------------------|---------------------------------|---------|-------------------------------|---------------------------------------------------------------------|
| SOC1                                            | AE1                             | score   | AE2                           | SOC2                                                                |
| Respiratory, thoracic and mediastinal disorders | Asphyxia                        | 0.90782 | Pregnancy test false positive | Investigations                                                      |
| Immune system disorders                         | Jarisch-Herxheimer reaction     | 0.90763 | Haemorrhagic disorder         | Blood and lymphatic system disorders                                |
| Eye disorders                                   | Retinal vascular thrombosis     | 0.90746 | Haemangioma of liver          | Neoplasms benign, malignant and unspecified (incl cysts and polyps) |
| Metabolism and nutrition disorders              | Fluid imbalance                 | 0.90740 | Scoliosis                     | Musculoskeletal and connective tissue disorders                     |
| Respiratory, thoracic and mediastinal disorders | Laryngeal obstruction           | 0.90740 | Fluid imbalance               | Metabolism and nutrition disorders                                  |
| Eye disorders                                   | Posterior capsule opacification | 0.90740 | Fluid imbalance               | Metabolism and nutrition disorders                                  |
| Injury, poisoning and procedural complications  | Tendon injury                   | 0.90740 | Fluid imbalance               | Metabolism and nutrition disorders                                  |
| Metabolism and nutrition disorders              | Fluid imbalance                 | 0.90740 | Nasal mucosa atrophy          | Respiratory, thoracic and mediastinal disorders                     |
| Metabolism and nutrition disorders              | Fluid imbalance                 | 0.90740 | Chorioretinopathy             | Eye disorders                                                       |
| Investigations                                  | Blood chromium decreased        | 0.90740 | Fluid imbalance               | Metabolism and nutrition disorders                                  |
| Metabolism and nutrition disorders              | Fluid imbalance                 | 0.90740 | Scleromalacia                 | Eye disorders                                                       |
| Investigations                                  | Blood zinc decreased            | 0.90719 | Retinal oedema                | Eye disorders                                                       |
| Infections and infestations                     | Corneal infection               | 0.90717 | Adrenal suppression           | Endocrine disorders                                                 |
| Reproductive system and breast disorders        | Enlarged clitoris               | 0.90669 | Peliosis hepatis              | Hepatobiliary disorders                                             |
| Eye disorders                                   | Cataract subcapsular            | 0.90663 | Adrenal suppression           | Endocrine disorders                                                 |
| Congenital, familial and genetic disorders      | Limb reduction defect           | 0.90658 | Asphyxia                      | Respiratory, thoracic and mediastinal disorders                     |
| Infections and infestations                     | Respiratory moniliasis          | 0.90652 | Diastolic dysfunction         | Cardiac disorders                                                   |
| Cardiac disorders                               | Diastolic dysfunction           | 0.90652 | Pancreatic fistula            | Gastrointestinal disorders                                          |
| Gastrointestinal disorders                      | Peritoneal fibrosis             | 0.90652 | Diastolic dysfunction         | Cardiac disorders                                                   |
| Psychiatric disorders                           | Stereotypic movement disorder   | 0.90647 | Acute respiratory failure     | Respiratory, thoracic and mediastinal disorders                     |

| Basis data for network                                              |                                               |         |                                               |                                                |
|---------------------------------------------------------------------|-----------------------------------------------|---------|-----------------------------------------------|------------------------------------------------|
| SOC1                                                                | AE1                                           | score   | AE2                                           | SOC2                                           |
| Infections and infestations                                         | Corneal infection                             | 0.90645 | Virilism                                      | Endocrine disorders                            |
| Gastrointestinal disorders                                          | Rectal ulcer                                  | 0.90632 | Cerebellar artery occlusion                   | Nervous system disorders                       |
| Endocrine disorders                                                 | Virilism                                      | 0.90630 | Spinal fracture                               | Injury, poisoning and procedural complications |
| Gastrointestinal disorders                                          | Intestinal dilatation                         | 0.90617 | Obsessive-compulsive disorder                 | Psychiatric disorders                          |
| Investigations                                                      | Urine calcium decreased                       | 0.90617 | Osteocalcin decreased                         | Investigations                                 |
| Investigations                                                      | Blood 25-hydroxycholecalciferol increased     | 0.90617 | Blood 1,25-dihydroxycholecalciferol increased | Investigations                                 |
| Neoplasms benign, malignant and unspecified (incl cysts and polyps) | Gammopathy                                    | 0.90617 | Blood 1,25-dihydroxycholecalciferol increased | Investigations                                 |
| Investigations                                                      | Blood 1,25-dihydroxycholecalciferol increased | 0.90617 | Urine calcium decreased                       | Investigations                                 |
| Investigations                                                      | Blood 25-hydroxycholecalciferol increased     | 0.90617 | Osteocalcin decreased                         | Investigations                                 |
| Injury, poisoning and procedural complications                      | Rib fracture                                  | 0.90617 | Osteocalcin decreased                         | Investigations                                 |
| Neoplasms benign, malignant and unspecified (incl cysts and polyps) | Gammopathy                                    | 0.90617 | Osteocalcin decreased                         | Investigations                                 |
| Injury, poisoning and procedural complications                      | Rib fracture                                  | 0.90617 | Blood 1,25-dihydroxycholecalciferol increased | Investigations                                 |
| Immune system disorders                                             | Antiphospholipid syndrome                     | 0.90581 | Platelet aggregation increased                | Investigations                                 |
| Investigations                                                      | Platelet aggregation increased                | 0.90581 | Meige's syndrome                              | Nervous system disorders                       |
| Nervous system disorders                                            | Fontanelle bulging                            | 0.90578 | Biopsy thyroid gland abnormal                 | Investigations                                 |
| Endocrine disorders                                                 | Hypopituitarism                               | 0.90573 | Posterior capsule opacification               | Eye disorders                                  |
| Eye disorders                                                       | Scleromalacia                                 | 0.90573 | Hypopituitarism                               | Endocrine disorders                            |
| Endocrine disorders                                                 | Hypopituitarism                               | 0.90573 | Chorioretinopathy                             | Eye disorders                                  |
| Respiratory, thoracic and mediastinal disorders                     | Nasal mucosa atrophy                          | 0.90573 | Hypopituitarism                               | Endocrine disorders                            |
| Investigations                                                      | Blood chromium decreased                      | 0.90573 | Hypopituitarism                               | Endocrine disorders                            |

| Basis data for network                          |                                    |         |                                   |                                                      |
|-------------------------------------------------|------------------------------------|---------|-----------------------------------|------------------------------------------------------|
| SOC1                                            | AE1                                | score   | AE2                               | SOC2                                                 |
| Musculoskeletal and connective tissue disorders | Scoliosis                          | 0.90573 | Hypopituitarism                   | Endocrine disorders                                  |
| Injury, poisoning and procedural complications  | Tendon injury                      | 0.90573 | Hypopituitarism                   | Endocrine disorders                                  |
| Respiratory, thoracic and mediastinal disorders | Laryngeal obstruction              | 0.90573 | Hypopituitarism                   | Endocrine disorders                                  |
| Endocrine disorders                             | Hypothalamo-pituitary disorders    | 0.90560 | Cataract subcapsular              | Eye disorders                                        |
| Psychiatric disorders                           | Phobia of driving                  | 0.90536 | Drug withdrawal syndrome neonatal | General disorders and administration site conditions |
| Endocrine disorders                             | Cushingoid                         | 0.90517 | Injection site abscess sterile    | General disorders and administration site conditions |
| Musculoskeletal and connective tissue disorders | Extremity contracture              | 0.90517 | Neonatal anuria                   | Renal and urinary disorders                          |
| Nervous system disorders                        | Meige's syndrome                   | 0.90512 | Tongue paralysis                  | Nervous system disorders                             |
| Immune system disorders                         | Antiphospholipid syndrome          | 0.90512 | Tongue paralysis                  | Nervous system disorders                             |
| Endocrine disorders                             | Adrenocortical insufficiency acute | 0.90509 | Hypercoagulation                  | Blood and lymphatic system disorders                 |
| Injury, poisoning and procedural complications  | Spinal fracture                    | 0.90484 | Hypopituitarism                   | Endocrine disorders                                  |
| Endocrine disorders                             | Cushingoid                         | 0.90467 | Skin fragility                    | Skin and subcutaneous tissue disorders               |
| Reproductive system and breast disorders        | Peyronie's disease                 | 0.90465 | Mesenteric artery embolism        | Gastrointestinal disorders                           |
| Skin and subcutaneous tissue disorders          | Panniculitis                       | 0.90462 | Hip fracture                      | Injury, poisoning and procedural complications       |
| Gastrointestinal disorders                      | Perianal erythema                  | 0.90462 | Bloody discharge                  | General disorders and administration site conditions |
| Gastrointestinal disorders                      | Perianal erythema                  | 0.90462 | Nonspecific reaction              | General disorders and administration site conditions |
| Renal and urinary disorders                     | Bilirubinuria                      | 0.90460 | Compression fracture              | Injury, poisoning and procedural complications       |
| Investigations                                  | Drug level changed                 | 0.90460 | Bilirubinuria                     | Renal and urinary disorders                          |
| Renal and urinary disorders                     | Bilirubinuria                      | 0.90460 | Immunoglobulins decreased         | Investigations                                       |
| Investigations                                  | Glucocorticoids increased          | 0.90454 | Pierre Robin syndrome             | Congenital, familial and genetic disorders           |

| Basis data for network                          |                                    |         |                                         |                                                 |
|-------------------------------------------------|------------------------------------|---------|-----------------------------------------|-------------------------------------------------|
| SOC1                                            | AE1                                | score   | AE2                                     | SOC2                                            |
| Cardiac disorders                               | Bradycardia neonatal               | 0.90454 | Glucocorticoids increased               | Investigations                                  |
| Investigations                                  | Glucocorticoids increased          | 0.90454 | Osteitis deformans                      | Musculoskeletal and connective tissue disorders |
| Investigations                                  | Glucocorticoids increased          | 0.90454 | Viral upper respiratory tract infection | Infections and infestations                     |
| Investigations                                  | Glucocorticoids increased          | 0.90454 | Oral fungal infection                   | Infections and infestations                     |
| Eye disorders                                   | Cataract subcapsular               | 0.90403 | Growth retardation                      | Musculoskeletal and connective tissue disorders |
| Cardiac disorders                               | Accelerated idioventricular rhythm | 0.90387 | Learning disorder                       | Psychiatric disorders                           |
| Nervous system disorders                        | Facial spasm                       | 0.90339 | Asphyxia                                | Respiratory, thoracic and mediastinal disorders |
| Endocrine disorders                             | Hypopituitarism                    | 0.90330 | Corneal infection                       | Infections and infestations                     |
| Psychiatric disorders                           | Obsessive-compulsive disorder      | 0.90291 | Dyskinesia oesophageal                  | Gastrointestinal disorders                      |
| Skin and subcutaneous tissue disorders          | Skin striae                        | 0.90288 | Cushing's syndrome                      | Endocrine disorders                             |
| Gastrointestinal disorders                      | Intestinal dilatation              | 0.90271 | Tongue paralysis                        | Nervous system disorders                        |
| Respiratory, thoracic and mediastinal disorders | Acute respiratory failure          | 0.90252 | Dyskinesia oesophageal                  | Gastrointestinal disorders                      |
| Investigations                                  | Blood growth hormone increased     | 0.90238 | Obsessive-compulsive disorder           | Psychiatric disorders                           |
| Endocrine disorders                             | Adrenocortical insufficiency acute | 0.90213 | Leukoderma                              | Skin and subcutaneous tissue disorders          |
| Investigations                                  | Blood chromium decreased           | 0.90210 | Cataract subcapsular                    | Eye disorders                                   |
| Respiratory, thoracic and mediastinal disorders | Nasal mucosa atrophy               | 0.90210 | Cataract subcapsular                    | Eye disorders                                   |
| Eye disorders                                   | Cataract subcapsular               | 0.90210 | Scoliosis                               | Musculoskeletal and connective tissue disorders |
| Respiratory, thoracic and mediastinal disorders | Laryngeal obstruction              | 0.90210 | Cataract subcapsular                    | Eye disorders                                   |
| Eye disorders                                   | Cataract subcapsular               | 0.90210 | Tendon injury                           | Injury, poisoning and procedural complications  |
| Eye disorders                                   | Chorioretinopathy                  | 0.90210 | Cataract subcapsular                    | Eye disorders                                   |

| Basis data for network                          |                                 |         |                             |                                                      |
|-------------------------------------------------|---------------------------------|---------|-----------------------------|------------------------------------------------------|
| SOC1                                            | AE1                             | score   | AE2                         | SOC2                                                 |
| Eye disorders                                   | Cataract subcapsular            | 0.90210 | Scleromalacia               | Eye disorders                                        |
| Eye disorders                                   | Posterior capsule opacification | 0.90210 | Cataract subcapsular        | Eye disorders                                        |
| Skin and subcutaneous tissue disorders          | Skin fragility                  | 0.90202 | Impaired healing            | General disorders and administration site conditions |
| Gastrointestinal disorders                      | Rectal ulcer                    | 0.90184 | Mesenteric occlusion        | Gastrointestinal disorders                           |
| Investigations                                  | Carotene decreased              | 0.90173 | Macular vasospasm           | Eye disorders                                        |
| Skin and subcutaneous tissue disorders          | Fat atrophy                     | 0.90172 | Panniculitis                | Skin and subcutaneous tissue disorders               |
| Respiratory, thoracic and mediastinal disorders | Aspiration                      | 0.90150 | Liver function test         | Investigations                                       |
| Metabolism and nutrition disorders              | Fat redistribution              | 0.90127 | Lipodystrophy acquired      | Skin and subcutaneous tissue disorders               |
| Skin and subcutaneous tissue disorders          | Leukoderma                      | 0.90113 | Catabolic state             | Metabolism and nutrition disorders                   |
| Psychiatric disorders                           | Obsessive-compulsive disorder   | 0.90102 | Injection site nodule       | General disorders and administration site conditions |
| Eye disorders                                   | Cataract subcapsular            | 0.90088 | Catabolic state             | Metabolism and nutrition disorders                   |
| Metabolism and nutrition disorders              | Catabolic state                 | 0.90074 | Urine calcium increased     | Investigations                                       |
| Psychiatric disorders                           | Inappropriate affect            | 0.90043 | Coprolalia                  | Psychiatric disorders                                |
| Gastrointestinal disorders                      | Colonic atony                   | 0.90023 | Jarisch-Herxheimer reaction | Immune system disorders                              |
| Respiratory, thoracic and mediastinal disorders | Aspiration                      | 0.90013 | Retrograde ejaculation      | Reproductive system and breast disorders             |
| Nervous system disorders                        | Facial spasm                    | 0.90012 | Aspiration                  | Respiratory, thoracic and mediastinal disorders      |
| Injury, poisoning and procedural complications  | Spinal fracture                 | 0.90009 | Cataract subcapsular        | Eye disorders                                        |
| Reproductive system and breast disorders        | Breast engorgement              | 0.89995 | Meige's syndrome            | Nervous system disorders                             |
| Immune system disorders                         | Antiphospholipid syndrome       | 0.89995 | Breast engorgement          | Reproductive system and breast disorders             |
| Immune system disorders                         | Graft versus host disease       | 0.89991 | Immunoglobulins decreased   | Investigations                                       |

| Basis data for network                          |                                  |         |                                |                                                 |
|-------------------------------------------------|----------------------------------|---------|--------------------------------|-------------------------------------------------|
| SOC1                                            | AE1                              | score   | AE2                            | SOC2                                            |
| Injury, poisoning and procedural complications  | Compression fracture             | 0.89991 | Graft versus host disease      | Immune system disorders                         |
| Investigations                                  | Drug level changed               | 0.89991 | Graft versus host disease      | Immune system disorders                         |
| Endocrine disorders                             | Hypopituitarism                  | 0.89977 | Catabolic state                | Metabolism and nutrition disorders              |
| Respiratory, thoracic and mediastinal disorders | Acute respiratory failure        | 0.89975 | Aspermia                       | Reproductive system and breast disorders        |
| Skin and subcutaneous tissue disorders          | Panniculitis                     | 0.89955 | Hypercoagulation               | Blood and lymphatic system disorders            |
| Nervous system disorders                        | Glossopharyngeal nerve paralysis | 0.89947 | Vocal cord paralysis           | Nervous system disorders                        |
| Nervous system disorders                        | Vocal cord paralysis             | 0.89947 | Atonic urinary bladder         | Renal and urinary disorders                     |
| Gastrointestinal disorders                      | Rectal ulcer                     | 0.89947 | Gastrointestinal ischaemia     | Gastrointestinal disorders                      |
| Vascular disorders                              | Aortic aneurysm                  | 0.89943 | Nasal mucosa atrophy           | Respiratory, thoracic and mediastinal disorders |
| Musculoskeletal and connective tissue disorders | Scoliosis                        | 0.89943 | Aortic aneurysm                | Vascular disorders                              |
| Vascular disorders                              | Aortic aneurysm                  | 0.89943 | Chorioretinopathy              | Eye disorders                                   |
| Eye disorders                                   | Posterior capsule opacification  | 0.89943 | Aortic aneurysm                | Vascular disorders                              |
| Injury, poisoning and procedural complications  | Tendon injury                    | 0.89943 | Aortic aneurysm                | Vascular disorders                              |
| Investigations                                  | Blood chromium decreased         | 0.89943 | Aortic aneurysm                | Vascular disorders                              |
| Eye disorders                                   | Scleromalacia                    | 0.89943 | Aortic aneurysm                | Vascular disorders                              |
| Vascular disorders                              | Aortic aneurysm                  | 0.89943 | Laryngeal obstruction          | Respiratory, thoracic and mediastinal disorders |
| Gastrointestinal disorders                      | Intestinal dilatation            | 0.89901 | Platelet aggregation increased | Investigations                                  |
| Investigations                                  | Progesterone increased           | 0.89888 | Extensor plantar response      | Nervous system disorders                        |
| Investigations                                  | Liver function test              | 0.89879 | Asphyxia                       | Respiratory, thoracic and mediastinal disorders |
| Eye disorders                                   | Macular vasospasm                | 0.89876 | Pathogen resistance            | Infections and infestations                     |

| Basis data for network                          |                                            |         |                                    |                                                 |
|-------------------------------------------------|--------------------------------------------|---------|------------------------------------|-------------------------------------------------|
| SOC1                                            | AE1                                        | score   | AE2                                | SOC2                                            |
| Metabolism and nutrition disorders              | Fluid imbalance                            | 0.89847 | Catabolic state                    | Metabolism and nutrition disorders              |
| Investigations                                  | Blood zinc decreased                       | 0.89845 | Renal vasculitis                   | Renal and urinary disorders                     |
| Reproductive system and breast disorders        | Vulval oedema                              | 0.89837 | Genital erythema                   | Reproductive system and breast disorders        |
| Investigations                                  | Spermatozoa progressive motility decreased | 0.89831 | Meige's syndrome                   | Nervous system disorders                        |
| Investigations                                  | Spermatozoa progressive motility decreased | 0.89831 | Antiphospholipid syndrome          | Immune system disorders                         |
| Psychiatric disorders                           | Obsessive-compulsive disorder              | 0.89799 | Aspermia                           | Reproductive system and breast disorders        |
| Respiratory, thoracic and mediastinal disorders | Aspiration                                 | 0.89782 | Stereotypic movement disorder      | Psychiatric disorders                           |
| Metabolism and nutrition disorders              | Hypercatabolism                            | 0.89770 | Adrenocortical insufficiency acute | Endocrine disorders                             |
| Cardiac disorders                               | Hypertrophic cardiomyopathy                | 0.89756 | Spinal fracture                    | Injury, poisoning and procedural complications  |
| Cardiac disorders                               | Hypertrophic cardiomyopathy                | 0.89754 | Nasal mucosa atrophy               | Respiratory, thoracic and mediastinal disorders |
| Cardiac disorders                               | Hypertrophic cardiomyopathy                | 0.89754 | Laryngeal obstruction              | Respiratory, thoracic and mediastinal disorders |
| Eye disorders                                   | Chorioretinopathy                          | 0.89754 | Hypertrophic cardiomyopathy        | Cardiac disorders                               |
| Cardiac disorders                               | Hypertrophic cardiomyopathy                | 0.89754 | Scoliosis                          | Musculoskeletal and connective tissue disorders |
| Cardiac disorders                               | Hypertrophic cardiomyopathy                | 0.89754 | Tendon injury                      | Injury, poisoning and procedural complications  |
| Eye disorders                                   | Scleromalacia                              | 0.89754 | Hypertrophic cardiomyopathy        | Cardiac disorders                               |
| Eye disorders                                   | Posterior capsule opacification            | 0.89754 | Hypertrophic cardiomyopathy        | Cardiac disorders                               |
| Investigations                                  | Blood chromium decreased                   | 0.89754 | Hypertrophic cardiomyopathy        | Cardiac disorders                               |
| Investigations                                  | Haemoglobin                                | 0.89751 | Pericardial rub                    | Cardiac disorders                               |
| Investigations                                  | Drug level increased                       | 0.89751 | Pericardial rub                    | Cardiac disorders                               |
| Cardiac disorders                               | Pericardial rub                            | 0.89751 | Blood electrolytes increased       | Investigations                                  |



| Basis data for network                               |                                 |         |                                      |                                                |
|------------------------------------------------------|---------------------------------|---------|--------------------------------------|------------------------------------------------|
| SOC1                                                 | AE1                             | score   | AE2                                  | SOC2                                           |
| Cardiac disorders                                    | Pericardial rub                 | 0.89751 | Lobar pneumonia                      | Infections and infestations                    |
| Investigations                                       | Haematocrit                     | 0.89751 | Pericardial rub                      | Cardiac disorders                              |
| Investigations                                       | Electrophoresis abnormal        | 0.89751 | Pericardial rub                      | Cardiac disorders                              |
| Metabolism and nutrition disorders                   | Body fat disorder               | 0.89747 | Chorioretinopathy                    | Eye disorders                                  |
| Eye disorders                                        | Scleromalacia                   | 0.89747 | Body fat disorder                    | Metabolism and nutrition disorders             |
| Respiratory, thoracic and mediastinal disorders      | Laryngeal obstruction           | 0.89747 | Body fat disorder                    | Metabolism and nutrition disorders             |
| Musculoskeletal and connective tissue disorders      | Scoliosis                       | 0.89747 | Body fat disorder                    | Metabolism and nutrition disorders             |
| Eye disorders                                        | Posterior capsule opacification | 0.89747 | Body fat disorder                    | Metabolism and nutrition disorders             |
| Metabolism and nutrition disorders                   | Body fat disorder               | 0.89747 | Tendon injury                        | Injury, poisoning and procedural complications |
| Respiratory, thoracic and mediastinal disorders      | Nasal mucosa atrophy            | 0.89747 | Body fat disorder                    | Metabolism and nutrition disorders             |
| Metabolism and nutrition disorders                   | Body fat disorder               | 0.89747 | Blood chromium decreased             | Investigations                                 |
| Metabolism and nutrition disorders                   | Vitamin K deficiency            | 0.89740 | Coombs test positive                 | Investigations                                 |
| Reproductive system and breast disorders             | Erection increased              | 0.89722 | Enlarged clitoris                    | Reproductive system and breast disorders       |
| Nervous system disorders                             | Tardive dyskinesia              | 0.89715 | Choreoathetosis                      | Nervous system disorders                       |
| Eye disorders                                        | Contact lens intolerance        | 0.89714 | Withdrawal bleed                     | Reproductive system and breast disorders       |
| Nervous system disorders                             | Tongue paralysis                | 0.89704 | Blood antidiuretic hormone increased | Investigations                                 |
| Skin and subcutaneous tissue disorders               | Skin striae                     | 0.89677 | Skin hypopigmentation                | Skin and subcutaneous tissue disorders         |
| Infections and infestations                          | Corneal infection               | 0.89673 | Cushingoid                           | Endocrine disorders                            |
| Respiratory, thoracic and mediastinal disorders      | Aspiration                      | 0.89666 | Sperm count increased                | Investigations                                 |
| General disorders and administration site conditions | Injection site abscess sterile  | 0.89654 | Hypercatabolism                      | Metabolism and nutrition disorders             |

| Basis data for network                          |                                      |         |                                 |                                                 |
|-------------------------------------------------|--------------------------------------|---------|---------------------------------|-------------------------------------------------|
| SOC1                                            | AE1                                  | score   | AE2                             | SOC2                                            |
| Cardiac disorders                               | Hypertrophic cardiomyopathy          | 0.89653 | Hypopituitarism                 | Endocrine disorders                             |
| Skin and subcutaneous tissue disorders          | Skin atrophy                         | 0.89644 | Cataract subcapsular            | Eye disorders                                   |
| Investigations                                  | Urine calcium increased              | 0.89639 | Spinal fracture                 | Injury, poisoning and procedural complications  |
| Investigations                                  | Immunoglobulins increased            | 0.89630 | Adrenergic syndrome             | Nervous system disorders                        |
| Investigations                                  | Blood pressure orthostatic increased | 0.89630 | Immunoglobulins increased       | Investigations                                  |
| Infections and infestations                     | Oropharyngeal candidiasis            | 0.89621 | Nasal septum perforation        | Respiratory, thoracic and mediastinal disorders |
| Eye disorders                                   | Cataract subcapsular                 | 0.89619 | Grey syndrome neonatal          | Cardiac disorders                               |
| Nervous system disorders                        | Retrograde amnesia                   | 0.89616 | Incoherent                      | Nervous system disorders                        |
| Cardiac disorders                               | Grey syndrome neonatal               | 0.89607 | Hypopituitarism                 | Endocrine disorders                             |
| Investigations                                  | Blood chromium decreased             | 0.89603 | Hypercatabolism                 | Metabolism and nutrition disorders              |
| Respiratory, thoracic and mediastinal disorders | Laryngeal obstruction                | 0.89603 | Hypercatabolism                 | Metabolism and nutrition disorders              |
| Metabolism and nutrition disorders              | Hypercatabolism                      | 0.89603 | Chorioretinopathy               | Eye disorders                                   |
| Metabolism and nutrition disorders              | Hypercatabolism                      | 0.89603 | Posterior capsule opacification | Eye disorders                                   |
| Metabolism and nutrition disorders              | Hypercatabolism                      | 0.89603 | Nasal mucosa atrophy            | Respiratory, thoracic and mediastinal disorders |
| Eye disorders                                   | Scleromalacia                        | 0.89603 | Hypercatabolism                 | Metabolism and nutrition disorders              |
| Metabolism and nutrition disorders              | Hypercatabolism                      | 0.89603 | Scoliosis                       | Musculoskeletal and connective tissue disorders |
| Injury, poisoning and procedural complications  | Tendon injury                        | 0.89603 | Hypercatabolism                 | Metabolism and nutrition disorders              |
| Metabolism and nutrition disorders              | Fat redistribution                   | 0.89598 | Hyperamylasaemia                | Metabolism and nutrition disorders              |
| Nervous system disorders                        | Tardive dyskinesia                   | 0.89596 | Akathisia                       | Nervous system disorders                        |
| Investigations                                  | Cortisol free urine decreased        | 0.89594 | Oropharyngeal candidiasis       | Infections and infestations                     |

| Basis data for network                                              |                                               |         |                                      |                                                                     |
|---------------------------------------------------------------------|-----------------------------------------------|---------|--------------------------------------|---------------------------------------------------------------------|
| SOC1                                                                | AE1                                           | score   | AE2                                  | SOC2                                                                |
| Metabolism and nutrition disorders                                  | Hypercatabolism                               | 0.89584 | Spinal fracture                      | Injury, poisoning and procedural complications                      |
| Respiratory, thoracic and mediastinal disorders                     | Asphyxia                                      | 0.89582 | Retrograde ejaculation               | Reproductive system and breast disorders                            |
| Injury, poisoning and procedural complications                      | Hip fracture                                  | 0.89564 | Adrenal suppression                  | Endocrine disorders                                                 |
| Injury, poisoning and procedural complications                      | Hip fracture                                  | 0.89541 | Hypercoagulation                     | Blood and lymphatic system disorders                                |
| Neoplasms benign, malignant and unspecified (incl cysts and polyps) | Pyogenic granuloma                            | 0.89525 | Mean cell haemoglobin decreased      | Investigations                                                      |
| Eye disorders                                                       | Pupillary disorder                            | 0.89525 | Pyogenic granuloma                   | Neoplasms benign, malignant and unspecified (incl cysts and polyps) |
| Neoplasms benign, malignant and unspecified (incl cysts and polyps) | Pyogenic granuloma                            | 0.89525 | Extraocular muscle paresis           | Eye disorders                                                       |
| Neoplasms benign, malignant and unspecified (incl cysts and polyps) | Pyogenic granuloma                            | 0.89525 | PCO2 increased                       | Investigations                                                      |
| General disorders and administration site conditions                | Secretion discharge                           | 0.89525 | Pyogenic granuloma                   | Neoplasms benign, malignant and unspecified (incl cysts and polyps) |
| Investigations                                                      | Mean cell haemoglobin concentration increased | 0.89525 | Pyogenic granuloma                   | Neoplasms benign, malignant and unspecified (incl cysts and polyps) |
| Investigations                                                      | Sperm count increased                         | 0.89516 | Asphyxia                             | Respiratory, thoracic and mediastinal disorders                     |
| Gastrointestinal disorders                                          | Tongue spasm                                  | 0.89509 | Arterial stenosis                    | Vascular disorders                                                  |
| Investigations                                                      | Platelet aggregation increased                | 0.89499 | Blood antidiuretic hormone increased | Investigations                                                      |
| Reproductive system and breast disorders                            | Retrograde ejaculation                        | 0.89480 | Tongue paralysis                     | Nervous system disorders                                            |
| Cardiac disorders                                                   | Accelerated idioventricular rhythm            | 0.89480 | Trigeminal neuralgia                 | Nervous system disorders                                            |
| Gastrointestinal disorders                                          | Mesenteric occlusion                          | 0.89475 | Arterial stenosis                    | Vascular disorders                                                  |
| Nervous system disorders                                            | Carotid artery disease                        | 0.89472 | Cerebellar artery occlusion          | Nervous system disorders                                            |
| Hepatobiliary disorders                                             | Gallbladder pain                              | 0.89468 | Episcleritis                         | Eye disorders                                                       |
| Eye disorders                                                       | Episcleritis                                  | 0.89468 | Anastomotic ulcer                    | Injury, poisoning and procedural complications                      |
| Gastrointestinal disorders                                          | Rectal ulcer                                  | 0.89423 | Arterial stenosis                    | Vascular disorders                                                  |

| Basis data for network                               |                                      |         |                                        |                                          |
|------------------------------------------------------|--------------------------------------|---------|----------------------------------------|------------------------------------------|
| SOC1                                                 | AE1                                  | score   | AE2                                    | SOC2                                     |
| Skin and subcutaneous tissue disorders               | Fat atrophy                          | 0.89422 | Cerebral venous thrombosis             | Nervous system disorders                 |
| Cardiac disorders                                    | Grey syndrome neonatal               | 0.89417 | Virilism                               | Endocrine disorders                      |
| Infections and infestations                          | Tinea pedis                          | 0.89392 | Alcohol withdrawal syndrome            | Psychiatric disorders                    |
| Infections and infestations                          | Carbuncle                            | 0.89392 | Mitral valve prolapse                  | Cardiac disorders                        |
| Infections and infestations                          | Carbuncle                            | 0.89392 | Syphilis                               | Infections and infestations              |
| Infections and infestations                          | Syphilis                             | 0.89392 | Lip blister                            | Gastrointestinal disorders               |
| Gastrointestinal disorders                           | Intestinal mass                      | 0.89392 | Mitral valve prolapse                  | Cardiac disorders                        |
| Cardiac disorders                                    | Mitral valve prolapse                | 0.89392 | Lip blister                            | Gastrointestinal disorders               |
| Gastrointestinal disorders                           | Intestinal mass                      | 0.89392 | Syphilis                               | Infections and infestations              |
| Gastrointestinal disorders                           | Peptic ulcer perforation             | 0.89385 | Fat atrophy                            | Skin and subcutaneous tissue disorders   |
| Nervous system disorders                             | Tongue paralysis                     | 0.89379 | Dyskinesia oesophageal                 | Gastrointestinal disorders               |
| Psychiatric disorders                                | Tearfulness                          | 0.89374 | Penile discharge                       | Reproductive system and breast disorders |
| General disorders and administration site conditions | Loss of control of legs              | 0.89374 | Penile discharge                       | Reproductive system and breast disorders |
| Metabolism and nutrition disorders                   | Hypercatabolism                      | 0.89369 | Corneal infection                      | Infections and infestations              |
| Injury, poisoning and procedural complications       | Spinal fracture                      | 0.89369 | Leukoderma                             | Skin and subcutaneous tissue disorders   |
| Cardiac disorders                                    | Hypertrophic cardiomyopathy          | 0.89358 | Secondary adrenocortical insufficiency | Endocrine disorders                      |
| Investigations                                       | Blood antidiuretic hormone increased | 0.89352 | Breast engorgement                     | Reproductive system and breast disorders |
| Vascular disorders                                   | Aortic aneurysm                      | 0.89341 | Corneal infection                      | Infections and infestations              |
| Investigations                                       | Secretion gastric absent             | 0.89340 | Lacrimation decreased                  | Eye disorders                            |
| Gastrointestinal disorders                           | Tongue spasm                         | 0.89325 | Gastrointestinal ischaemia             | Gastrointestinal disorders               |

| Basis data for network                          |                                    |         |                                |                                                      |
|-------------------------------------------------|------------------------------------|---------|--------------------------------|------------------------------------------------------|
| SOC1                                            | AE1                                | score   | AE2                            | SOC2                                                 |
| Metabolism and nutrition disorders              | Vitamin K deficiency               | 0.89325 | Urine glucose false positive   | Investigations                                       |
| Renal and urinary disorders                     | Neurogenic bladder                 | 0.89321 | Congenital pneumonia           | Congenital, familial and genetic disorders           |
| Renal and urinary disorders                     | Neurogenic bladder                 | 0.89321 | Cephalin flocculation          | Investigations                                       |
| Nervous system disorders                        | Tongue paralysis                   | 0.89315 | Injection site nodule          | General disorders and administration site conditions |
| Eye disorders                                   | Cataract subcapsular               | 0.89313 | Skin striae                    | Skin and subcutaneous tissue disorders               |
| Reproductive system and breast disorders        | Breast engorgement                 | 0.89301 | Intestinal dilatation          | Gastrointestinal disorders                           |
| Eye disorders                                   | Cataract subcapsular               | 0.89300 | Hypertrophic cardiomyopathy    | Cardiac disorders                                    |
| Respiratory, thoracic and mediastinal disorders | Asphyxia                           | 0.89295 | Retinal pigmentation           | Eye disorders                                        |
| Nervous system disorders                        | Cerebral venous thrombosis         | 0.89293 | Hypercoagulation               | Blood and lymphatic system disorders                 |
| Metabolism and nutrition disorders              | Alkalosis hypokalaemic             | 0.89282 | Peptic ulcer perforation       | Gastrointestinal disorders                           |
| Investigations                                  | Platelet aggregation increased     | 0.89280 | Injection site nodule          | General disorders and administration site conditions |
| Metabolism and nutrition disorders              | Fluid imbalance                    | 0.89252 | Corneal infection              | Infections and infestations                          |
| Reproductive system and breast disorders        | Aspermia                           | 0.89251 | Platelet aggregation increased | Investigations                                       |
| Blood and lymphatic system disorders            | Polycythaemia                      | 0.89244 | Virilism                       | Endocrine disorders                                  |
| Endocrine disorders                             | Adrenocortical insufficiency acute | 0.89244 | Adrenal suppression            | Endocrine disorders                                  |
| Investigations                                  | Blood growth hormone increased     | 0.89237 | Asphyxia                       | Respiratory, thoracic and mediastinal disorders      |
| Investigations                                  | Blood growth hormone increased     | 0.89226 | Aspiration                     | Respiratory, thoracic and mediastinal disorders      |
| Cardiac disorders                               | Myocardial rupture                 | 0.89218 | Hypopituitarism                | Endocrine disorders                                  |
| Investigations                                  | Pregnancy test false positive      | 0.89216 | Breast engorgement             | Reproductive system and breast disorders             |
| Renal and urinary disorders                     | Glomerulonephritis                 | 0.89213 | Renal papillary necrosis       | Renal and urinary disorders                          |

| Basis data for network                          |                                 |         |                                 |                                                 |
|-------------------------------------------------|---------------------------------|---------|---------------------------------|-------------------------------------------------|
| SOC1                                            | AE1                             | score   | AE2                             | SOC2                                            |
| Investigations                                  | Platelet aggregation increased  | 0.89206 | Dyskinesia oesophageal          | Gastrointestinal disorders                      |
| Investigations                                  | Coombs direct test positive     | 0.89193 | Vitamin K deficiency            | Metabolism and nutrition disorders              |
| Metabolism and nutrition disorders              | Hypercatabolism                 | 0.89193 | Hypertrophic cardiomyopathy     | Cardiac disorders                               |
| Endocrine disorders                             | Adrenal suppression             | 0.89149 | Scleromalacia                   | Eye disorders                                   |
| Endocrine disorders                             | Adrenal suppression             | 0.89149 | Blood chromium decreased        | Investigations                                  |
| Musculoskeletal and connective tissue disorders | Scoliosis                       | 0.89149 | Adrenal suppression             | Endocrine disorders                             |
| Eye disorders                                   | Posterior capsule opacification | 0.89149 | Adrenal suppression             | Endocrine disorders                             |
| Respiratory, thoracic and mediastinal disorders | Laryngeal obstruction           | 0.89149 | Adrenal suppression             | Endocrine disorders                             |
| Endocrine disorders                             | Adrenal suppression             | 0.89149 | Chorioretinopathy               | Eye disorders                                   |
| Endocrine disorders                             | Adrenal suppression             | 0.89149 | Nasal mucosa atrophy            | Respiratory, thoracic and mediastinal disorders |
| Endocrine disorders                             | Adrenal suppression             | 0.89149 | Tendon injury                   | Injury, poisoning and procedural complications  |
| Respiratory, thoracic and mediastinal disorders | Rhinalgia                       | 0.89147 | Blood osmolarity decreased      | Investigations                                  |
| Nervous system disorders                        | Nerve degeneration              | 0.89118 | Candida pneumonia               | Infections and infestations                     |
| Skin and subcutaneous tissue disorders          | Skin hypopigmentation           | 0.89092 | Cataract subcapsular            | Eye disorders                                   |
| Musculoskeletal and connective tissue disorders | Myopathy steroid                | 0.89087 | Peptic ulcer perforation        | Gastrointestinal disorders                      |
| Investigations                                  | Urine calcium increased         | 0.89080 | Panniculitis                    | Skin and subcutaneous tissue disorders          |
| Nervous system disorders                        | Tongue paralysis                | 0.89074 | Aspermia                        | Reproductive system and breast disorders        |
| Investigations                                  | Pregnancy test false positive   | 0.89074 | Acute respiratory failure       | Respiratory, thoracic and mediastinal disorders |
| Hepatobiliary disorders                         | Autoimmune hepatitis            | 0.89059 | Cataract congenital             | Congenital, familial and genetic disorders      |
| Hepatobiliary disorders                         | Autoimmune hepatitis            | 0.89059 | Tooth discolouration congenital | Congenital, familial and genetic disorders      |

| Basis data for network                                              |                                            |         |                                             |                                                                     |
|---------------------------------------------------------------------|--------------------------------------------|---------|---------------------------------------------|---------------------------------------------------------------------|
| SOC1                                                                | AE1                                        | score   | AE2                                         | SOC2                                                                |
| Musculoskeletal and connective tissue disorders                     | Growth retardation                         | 0.89056 | Spinal compression fracture                 | Injury, poisoning and procedural complications                      |
| Respiratory, thoracic and mediastinal disorders                     | Asphyxia                                   | 0.89054 | Stereotypic movement disorder               | Psychiatric disorders                                               |
| Investigations                                                      | Spermatozoa progressive motility decreased | 0.89051 | Intestinal dilatation                       | Gastrointestinal disorders                                          |
| Metabolism and nutrition disorders                                  | Body fat disorder                          | 0.89043 | Spinal fracture                             | Injury, poisoning and procedural complications                      |
| Respiratory, thoracic and mediastinal disorders                     | Aspiration                                 | 0.89036 | Retinal pigmentation                        | Eye disorders                                                       |
| Investigations                                                      | Coombs test positive                       | 0.89034 | Platelet function test abnormal             | Investigations                                                      |
| Psychiatric disorders                                               | Learning disorder                          | 0.89033 | Trigeminal neuralgia                        | Nervous system disorders                                            |
| Neoplasms benign, malignant and unspecified (incl cysts and polyps) | Ovarian cancer                             | 0.89023 | Endometrial cancer                          | Neoplasms benign, malignant and unspecified (incl cysts and polyps) |
| Injury, poisoning and procedural complications                      | Hip fracture                               | 0.89017 | Fat atrophy                                 | Skin and subcutaneous tissue disorders                              |
| Endocrine disorders                                                 | Hypothalamo-pituitary disorders            | 0.89008 | Adrenal suppression                         | Endocrine disorders                                                 |
| Congenital, familial and genetic disorders                          | Fallot's tetralogy                         | 0.89003 | Tongue neoplasm malignant stage unspecified | Neoplasms benign, malignant and unspecified (incl cysts and polyps) |
| Neoplasms benign, malignant and unspecified (incl cysts and polyps) | Malignant hydatidiform mole                | 0.89003 | Fallot's tetralogy                          | Congenital, familial and genetic disorders                          |
| Congenital, familial and genetic disorders                          | Fallot's tetralogy                         | 0.89003 | Dwarfism                                    | Musculoskeletal and connective tissue disorders                     |
| Congenital, familial and genetic disorders                          | Congenital joint malformation              | 0.89003 | Fallot's tetralogy                          | Congenital, familial and genetic disorders                          |
| Congenital, familial and genetic disorders                          | Fallot's tetralogy                         | 0.89003 | Glioblastoma multiforme                     | Neoplasms benign, malignant and unspecified (incl cysts and polyps) |
| Congenital, familial and genetic disorders                          | Fallot's tetralogy                         | 0.89003 | Anal atresia                                | Congenital, familial and genetic disorders                          |
| Neoplasms benign, malignant and unspecified (incl cysts and polyps) | Pituitary tumour                           | 0.89003 | Fallot's tetralogy                          | Congenital, familial and genetic disorders                          |
| Congenital, familial and genetic disorders                          | Fallot's tetralogy                         | 0.89003 | Neurofibromatosis                           | Congenital, familial and genetic disorders                          |
| Neoplasms benign, malignant and unspecified (incl cysts and polyps) | Prolactinoma                               | 0.89003 | Fallot's tetralogy                          | Congenital, familial and genetic disorders                          |
| Eye disorders                                                       | Phosphenes                                 | 0.89003 | Fallot's tetralogy                          | Congenital, familial and genetic disorders                          |

| Basis data for network                                              |                                      |         |                            |                                                                     |
|---------------------------------------------------------------------|--------------------------------------|---------|----------------------------|---------------------------------------------------------------------|
| SOC1                                                                | AE1                                  | score   | AE2                        | SOC2                                                                |
| Congenital, familial and genetic disorders                          | Fallot's tetralogy                   | 0.89003 | Choriocarcinoma            | Neoplasms benign, malignant and unspecified (incl cysts and polyps) |
| Neoplasms benign, malignant and unspecified (incl cysts and polyps) | Hepatoblastoma                       | 0.89003 | Fallot's tetralogy         | Congenital, familial and genetic disorders                          |
| Respiratory, thoracic and mediastinal disorders                     | Acquired tracheo-oesophageal fistula | 0.89003 | Fallot's tetralogy         | Congenital, familial and genetic disorders                          |
| Congenital, familial and genetic disorders                          | Dermoid cyst of ovary                | 0.89003 | Fallot's tetralogy         | Congenital, familial and genetic disorders                          |
| Investigations                                                      | Urine calcium increased              | 0.89001 | Corneal infection          | Infections and infestations                                         |
| Skin and subcutaneous tissue disorders                              | Yellow nail syndrome                 | 0.88986 | Spinal claudication        | Nervous system disorders                                            |
| Congenital, familial and genetic disorders                          | Cerebral atrophy congenital          | 0.88986 | Yellow nail syndrome       | Skin and subcutaneous tissue disorders                              |
| Injury, poisoning and procedural complications                      | Stress fracture                      | 0.88986 | Yellow nail syndrome       | Skin and subcutaneous tissue disorders                              |
| Skin and subcutaneous tissue disorders                              | Yellow nail syndrome                 | 0.88986 | B-cell lymphoma            | Neoplasms benign, malignant and unspecified (incl cysts and polyps) |
| Metabolism and nutrition disorders                                  | Hypercatabolism                      | 0.88985 | Grey syndrome neonatal     | Cardiac disorders                                                   |
| Infections and infestations                                         | Fungal oesophagitis                  | 0.88982 | Nasal candidiasis          | Infections and infestations                                         |
| Infections and infestations                                         | Nasal candidiasis                    | 0.88982 | Pharyngeal candidiasis     | Infections and infestations                                         |
| Infections and infestations                                         | Nasal candidiasis                    | 0.88982 | Pharyngeal polyp           | Respiratory, thoracic and mediastinal disorders                     |
| Infections and infestations                                         | Herpetic stomatitis                  | 0.88982 | Nasal candidiasis          | Infections and infestations                                         |
| Infections and infestations                                         | Nasal candidiasis                    | 0.88982 | Myringitis                 | Infections and infestations                                         |
| Infections and infestations                                         | Nasal candidiasis                    | 0.88982 | Eczema infected            | Infections and infestations                                         |
| Infections and infestations                                         | Nasal candidiasis                    | 0.88982 | Creatinine urine decreased | Investigations                                                      |
| Infections and infestations                                         | Nasal candidiasis                    | 0.88982 | Aural polyp                | Ear and labyrinth disorders                                         |
| Congenital, familial and genetic disorders                          | Dentofacial anomaly                  | 0.88981 | Extremity contracture      | Musculoskeletal and connective tissue disorders                     |
| Gastrointestinal disorders                                          | Large intestine perforation          | 0.88966 | Fat atrophy                | Skin and subcutaneous tissue disorders                              |



| Basis data for network                          |                               |         |                               |                                                 |
|-------------------------------------------------|-------------------------------|---------|-------------------------------|-------------------------------------------------|
| SOC1                                            | AE1                           | score   | AE2                           | SOC2                                            |
| Metabolism and nutrition disorders              | Glucose tolerance impaired    | 0.88942 | Fat atrophy                   | Skin and subcutaneous tissue disorders          |
| Metabolism and nutrition disorders              | Alkalosis hypokalaemic        | 0.88929 | Growth retardation            | Musculoskeletal and connective tissue disorders |
| Congenital, familial and genetic disorders      | Tourette's disorder           | 0.88926 | Antiphospholipid syndrome     | Immune system disorders                         |
| Nervous system disorders                        | Meige's syndrome              | 0.88926 | Tourette's disorder           | Congenital, familial and genetic disorders      |
| Blood and lymphatic system disorders            | Hypercoagulation              | 0.88919 | Fat atrophy                   | Skin and subcutaneous tissue disorders          |
| Metabolism and nutrition disorders              | Catabolic state               | 0.88915 | Hypertrophic cardiomyopathy   | Cardiac disorders                               |
| Nervous system disorders                        | Cerebral venous thrombosis    | 0.88913 | Body fat disorder             | Metabolism and nutrition disorders              |
| Vascular disorders                              | Aortic aneurysm               | 0.88891 | Catabolic state               | Metabolism and nutrition disorders              |
| Congenital, familial and genetic disorders      | Tourette's disorder           | 0.88886 | Tongue paralysis              | Nervous system disorders                        |
| Musculoskeletal and connective tissue disorders | Growth retardation            | 0.88881 | Myopathy steroid              | Musculoskeletal and connective tissue disorders |
| Skin and subcutaneous tissue disorders          | Panniculitis                  | 0.88862 | Alkalosis hypokalaemic        | Metabolism and nutrition disorders              |
| Psychiatric disorders                           | Obsessive-compulsive disorder | 0.88837 | Pregnancy test false positive | Investigations                                  |
| Reproductive system and breast disorders        | Breast engorgement            | 0.88831 | Facial spasm                  | Nervous system disorders                        |
| Metabolism and nutrition disorders              | Hypercatabolism               | 0.88819 | Spinal compression fracture   | Injury, poisoning and procedural complications  |
| Immune system disorders                         | Antiphospholipid syndrome     | 0.88807 | Orgasm abnormal               | Psychiatric disorders                           |
| Psychiatric disorders                           | Orgasm abnormal               | 0.88807 | Meige's syndrome              | Nervous system disorders                        |
| Metabolism and nutrition disorders              | Hyperoxalaemia                | 0.88803 | Anhedonia                     | Psychiatric disorders                           |
| Congenital, familial and genetic disorders      | Factor V deficiency           | 0.88794 | Hepatic haemorrhage           | Hepatobiliary disorders                         |
| Hepatobiliary disorders                         | Hepatic vein thrombosis       | 0.88794 | Hepatic haemorrhage           | Hepatobiliary disorders                         |
| Hepatobiliary disorders                         | Hepatic haemorrhage           | 0.88794 | Budd-Chiari syndrome          | Hepatobiliary disorders                         |

| Basis data for network                                              |                                      |         |                                            |                                                 |
|---------------------------------------------------------------------|--------------------------------------|---------|--------------------------------------------|-------------------------------------------------|
| SOC1                                                                | AE1                                  | score   | AE2                                        | SOC2                                            |
| Neoplasms benign, malignant and unspecified (incl cysts and polyps) | Tumour necrosis                      | 0.88794 | Hepatic haemorrhage                        | Hepatobiliary disorders                         |
| Hepatobiliary disorders                                             | Hepatic haemorrhage                  | 0.88794 | Mallory-Weiss syndrome                     | Gastrointestinal disorders                      |
| Vascular disorders                                                  | Arterial haemorrhage                 | 0.88794 | Hepatic haemorrhage                        | Hepatobiliary disorders                         |
| Hepatobiliary disorders                                             | Hepatic haemorrhage                  | 0.88794 | Acute prerenal failure                     | Renal and urinary disorders                     |
| Nervous system disorders                                            | Tongue paralysis                     | 0.88791 | Retinal pigmentation                       | Eye disorders                                   |
| Respiratory, thoracic and mediastinal disorders                     | Acute respiratory failure            | 0.88786 | Retrograde ejaculation                     | Reproductive system and breast disorders        |
| Skin and subcutaneous tissue disorders                              | Leukoderma                           | 0.88780 | Grey syndrome neonatal                     | Cardiac disorders                               |
| Endocrine disorders                                                 | Hypothalamo-pituitary disorders      | 0.88773 | Cushing's syndrome                         | Endocrine disorders                             |
| Skin and subcutaneous tissue disorders                              | Skin fragility                       | 0.88762 | Spinal fracture                            | Injury, poisoning and procedural complications  |
| Investigations                                                      | Glucocorticoids decreased            | 0.88755 | Adrenal disorder                           | Endocrine disorders                             |
| Investigations                                                      | Bone density increased               | 0.88755 | Adrenal disorder                           | Endocrine disorders                             |
| Investigations                                                      | Transaminases decreased              | 0.88755 | Adrenal disorder                           | Endocrine disorders                             |
| Metabolism and nutrition disorders                                  | Fluid imbalance                      | 0.88754 | Spinal fracture                            | Injury, poisoning and procedural complications  |
| Investigations                                                      | Blood antidiuretic hormone increased | 0.88744 | Spermatozoa progressive motility decreased | Investigations                                  |
| Respiratory, thoracic and mediastinal disorders                     | Rhinalgia                            | 0.88742 | Intestinal gangrene                        | Infections and infestations                     |
| Respiratory, thoracic and mediastinal disorders                     | Aspiration                           | 0.88730 | Laryngeal disorder                         | Respiratory, thoracic and mediastinal disorders |
| Reproductive system and breast disorders                            | Breast engorgement                   | 0.88730 | Aspermia                                   | Reproductive system and breast disorders        |
| Skin and subcutaneous tissue disorders                              | Leukoderma                           | 0.88714 | Adrenal suppression                        | Endocrine disorders                             |
| Musculoskeletal and connective tissue disorders                     | Growth retardation                   | 0.88702 | Fat atrophy                                | Skin and subcutaneous tissue disorders          |
| Metabolism and nutrition disorders                                  | Glucose tolerance impaired           | 0.88687 | Cataract subcapsular                       | Eye disorders                                   |

| Basis data for network                          |                                    |         |                                 |                                                 |
|-------------------------------------------------|------------------------------------|---------|---------------------------------|-------------------------------------------------|
| SOC1                                            | AE1                                | score   | AE2                             | SOC2                                            |
| Skin and subcutaneous tissue disorders          | Skin depigmentation                | 0.88684 | Nasal mucosa atrophy            | Respiratory, thoracic and mediastinal disorders |
| Respiratory, thoracic and mediastinal disorders | Laryngeal obstruction              | 0.88684 | Skin depigmentation             | Skin and subcutaneous tissue disorders          |
| Skin and subcutaneous tissue disorders          | Skin depigmentation                | 0.88684 | Posterior capsule opacification | Eye disorders                                   |
| Eye disorders                                   | Scleromalacia                      | 0.88684 | Skin depigmentation             | Skin and subcutaneous tissue disorders          |
| Investigations                                  | Blood chromium decreased           | 0.88684 | Skin depigmentation             | Skin and subcutaneous tissue disorders          |
| Skin and subcutaneous tissue disorders          | Skin depigmentation                | 0.88684 | Chorioretinopathy               | Eye disorders                                   |
| Skin and subcutaneous tissue disorders          | Skin depigmentation                | 0.88684 | Tendon injury                   | Injury, poisoning and procedural complications  |
| Skin and subcutaneous tissue disorders          | Skin depigmentation                | 0.88684 | Scoliosis                       | Musculoskeletal and connective tissue disorders |
| Eye disorders                                   | Scleromalacia                      | 0.88676 | Large intestine perforation     | Gastrointestinal disorders                      |
| Gastrointestinal disorders                      | Large intestine perforation        | 0.88676 | Blood chromium decreased        | Investigations                                  |
| Gastrointestinal disorders                      | Large intestine perforation        | 0.88676 | Tendon injury                   | Injury, poisoning and procedural complications  |
| Musculoskeletal and connective tissue disorders | Scoliosis                          | 0.88676 | Large intestine perforation     | Gastrointestinal disorders                      |
| Eye disorders                                   | Posterior capsule opacification    | 0.88676 | Large intestine perforation     | Gastrointestinal disorders                      |
| Gastrointestinal disorders                      | Large intestine perforation        | 0.88676 | Laryngeal obstruction           | Respiratory, thoracic and mediastinal disorders |
| Gastrointestinal disorders                      | Large intestine perforation        | 0.88676 | Nasal mucosa atrophy            | Respiratory, thoracic and mediastinal disorders |
| Gastrointestinal disorders                      | Large intestine perforation        | 0.88676 | Chorioretinopathy               | Eye disorders                                   |
| Endocrine disorders                             | Adrenocortical insufficiency acute | 0.88670 | Large intestine perforation     | Gastrointestinal disorders                      |
| Investigations                                  | Bile output decreased              | 0.88667 | Cough decreased                 | Respiratory, thoracic and mediastinal disorders |
| Respiratory, thoracic and mediastinal disorders | Cough decreased                    | 0.88667 | Bladder stenosis                | Renal and urinary disorders                     |
| Congenital, familial and genetic disorders      | Tourette's disorder                | 0.88665 | Laryngeal disorder              | Respiratory, thoracic and mediastinal disorders |

| Basis data for network                                              |                                             |         |                                      |                                                                     |
|---------------------------------------------------------------------|---------------------------------------------|---------|--------------------------------------|---------------------------------------------------------------------|
| SOC1                                                                | AE1                                         | score   | AE2                                  | SOC2                                                                |
| Metabolism and nutrition disorders                                  | Glucose tolerance impaired                  | 0.88658 | Alkalosis hypokalaemic               | Metabolism and nutrition disorders                                  |
| Metabolism and nutrition disorders                                  | Body fat disorder                           | 0.88647 | Catabolic state                      | Metabolism and nutrition disorders                                  |
| Reproductive system and breast disorders                            | Breast engorgement                          | 0.88645 | Dyskinesia oesophageal               | Gastrointestinal disorders                                          |
| Endocrine disorders                                                 | Adrenocortical insufficiency acute          | 0.88645 | Virilism                             | Endocrine disorders                                                 |
| Nervous system disorders                                            | Neuralgic amyotrophy                        | 0.88641 | Oscillopsia                          | Eye disorders                                                       |
| Eye disorders                                                       | Oscillopsia                                 | 0.88641 | Intracranial venous sinus thrombosis | Nervous system disorders                                            |
| Eye disorders                                                       | Oscillopsia                                 | 0.88641 | Negative thoughts                    | Psychiatric disorders                                               |
| Eye disorders                                                       | Oscillopsia                                 | 0.88641 | Corneal scar                         | Eye disorders                                                       |
| Nervous system disorders                                            | Dyspraxia                                   | 0.88641 | Oscillopsia                          | Eye disorders                                                       |
| Eye disorders                                                       | Oscillopsia                                 | 0.88641 | Drug withdrawal convulsions          | Nervous system disorders                                            |
| Eye disorders                                                       | Oscillopsia                                 | 0.88641 | Fibrin decreased                     | Investigations                                                      |
| Nervous system disorders                                            | Lennox-Gastaut syndrome                     | 0.88641 | Oscillopsia                          | Eye disorders                                                       |
| Infections and infestations                                         | Corneal infection                           | 0.88632 | Skin fragility                       | Skin and subcutaneous tissue disorders                              |
| Investigations                                                      | Nitrogen balance negative                   | 0.88626 | Spinal fracture                      | Injury, poisoning and procedural complications                      |
| Investigations                                                      | Nitrogen balance negative                   | 0.88618 | Corneal infection                    | Infections and infestations                                         |
| Respiratory, thoracic and mediastinal disorders                     | Laryngeal disorder                          | 0.88611 | Asphyxia                             | Respiratory, thoracic and mediastinal disorders                     |
| Neoplasms benign, malignant and unspecified (incl cysts and polyps) | Glioblastoma multiforme                     | 0.88599 | Astrocytoma                          | Neoplasms benign, malignant and unspecified (incl cysts and polyps) |
| Neoplasms benign, malignant and unspecified (incl cysts and polyps) | Tongue neoplasm malignant stage unspecified | 0.88599 | Astrocytoma                          | Neoplasms benign, malignant and unspecified (incl cysts and polyps) |
| Neoplasms benign, malignant and unspecified (incl cysts and polyps) | Astrocytoma                                 | 0.88599 | Dermoid cyst of ovary                | Congenital, familial and genetic disorders                          |
| Musculoskeletal and connective tissue disorders                     | Dwarfism                                    | 0.88599 | Astrocytoma                          | Neoplasms benign, malignant and unspecified (incl cysts and polyps) |

| Basis data for network                                              |                                        |         |                                      |                                                                     |
|---------------------------------------------------------------------|----------------------------------------|---------|--------------------------------------|---------------------------------------------------------------------|
| SOC1                                                                | AE1                                    | score   | AE2                                  | SOC2                                                                |
| Neoplasms benign, malignant and unspecified (incl cysts and polyps) | Pituitary tumour                       | 0.88599 | Astrocytoma                          | Neoplasms benign, malignant and unspecified (incl cysts and polyps) |
| Neoplasms benign, malignant and unspecified (incl cysts and polyps) | Malignant hydatidiform mole            | 0.88599 | Astrocytoma                          | Neoplasms benign, malignant and unspecified (incl cysts and polyps) |
| Neoplasms benign, malignant and unspecified (incl cysts and polyps) | Astrocytoma                            | 0.88599 | Choriocarcinoma                      | Neoplasms benign, malignant and unspecified (incl cysts and polyps) |
| Neoplasms benign, malignant and unspecified (incl cysts and polyps) | Astrocytoma                            | 0.88599 | Congenital joint malformation        | Congenital, familial and genetic disorders                          |
| Neoplasms benign, malignant and unspecified (incl cysts and polyps) | Astrocytoma                            | 0.88599 | Prolactinoma                         | Neoplasms benign, malignant and unspecified (incl cysts and polyps) |
| Congenital, familial and genetic disorders                          | Anal atresia                           | 0.88599 | Astrocytoma                          | Neoplasms benign, malignant and unspecified (incl cysts and polyps) |
| Eye disorders                                                       | Phosphenes                             | 0.88599 | Astrocytoma                          | Neoplasms benign, malignant and unspecified (incl cysts and polyps) |
| Respiratory, thoracic and mediastinal disorders                     | Acquired tracheo-oesophageal fistula   | 0.88599 | Astrocytoma                          | Neoplasms benign, malignant and unspecified (incl cysts and polyps) |
| Congenital, familial and genetic disorders                          | Neurofibromatosis                      | 0.88599 | Astrocytoma                          | Neoplasms benign, malignant and unspecified (incl cysts and polyps) |
| Neoplasms benign, malignant and unspecified (incl cysts and polyps) | Hepatoblastoma                         | 0.88599 | Astrocytoma                          | Neoplasms benign, malignant and unspecified (incl cysts and polyps) |
| General disorders and administration site conditions                | Injection site pruritus                | 0.88584 | Groin pain                           | Musculoskeletal and connective tissue disorders                     |
| Endocrine disorders                                                 | Secondary adrenocortical insufficiency | 0.88581 | Virilism                             | Endocrine disorders                                                 |
| Injury, poisoning and procedural complications                      | Spinal compression fracture            | 0.88555 | Panniculitis                         | Skin and subcutaneous tissue disorders                              |
| Skin and subcutaneous tissue disorders                              | Skin atrophy                           | 0.88553 | Heat rash                            | Skin and subcutaneous tissue disorders                              |
| Nervous system disorders                                            | Incoherent                             | 0.88544 | Angle closure glaucoma               | Eye disorders                                                       |
| Reproductive system and breast disorders                            | Withdrawal bleed                       | 0.88544 | Chloasma                             | Skin and subcutaneous tissue disorders                              |
| Psychiatric disorders                                               | Orgasm abnormal                        | 0.88530 | Blood antidiuretic hormone increased | Investigations                                                      |
| Respiratory, thoracic and mediastinal disorders                     | Acute respiratory failure              | 0.88522 | Facial spasm                         | Nervous system disorders                                            |
| Reproductive system and breast disorders                            | Breast engorgement                     | 0.88518 | Injection site nodule                | General disorders and administration site conditions                |

| Basis data for network                               |                       |         |                                            |                |
|------------------------------------------------------|-----------------------|---------|--------------------------------------------|----------------|
| SOC1                                                 | AE1                   | score   | AE2                                        | SOC2           |
| General disorders and administration site conditions | Injection site nodule | 0.88518 | Spermatozoa progressive motility decreased | Investigations |

| Basis data for network                          |                                            |         |                                 |                                                 |
|-------------------------------------------------|--------------------------------------------|---------|---------------------------------|-------------------------------------------------|
| SOC1                                            | AE1                                        | score   | AE2                             | SOC2                                            |
| Congenital, familial and genetic disorders      | Limb reduction defect                      | 0.88506 | Obsessive-compulsive disorder   | Psychiatric disorders                           |
| Investigations                                  | Liver function test                        | 0.88497 | Obsessive-compulsive disorder   | Psychiatric disorders                           |
| Skin and subcutaneous tissue disorders          | Skin fragility                             | 0.88497 | Posterior capsule opacification | Eye disorders                                   |
| Eye disorders                                   | Scleromalacia                              | 0.88497 | Skin fragility                  | Skin and subcutaneous tissue disorders          |
| Injury, poisoning and procedural complications  | Tendon injury                              | 0.88497 | Skin fragility                  | Skin and subcutaneous tissue disorders          |
| Skin and subcutaneous tissue disorders          | Skin fragility                             | 0.88497 | Scoliosis                       | Musculoskeletal and connective tissue disorders |
| Respiratory, thoracic and mediastinal disorders | Nasal mucosa atrophy                       | 0.88497 | Skin fragility                  | Skin and subcutaneous tissue disorders          |
| Investigations                                  | Blood chromium decreased                   | 0.88497 | Skin fragility                  | Skin and subcutaneous tissue disorders          |
| Skin and subcutaneous tissue disorders          | Skin fragility                             | 0.88497 | Laryngeal obstruction           | Respiratory, thoracic and mediastinal disorders |
| Skin and subcutaneous tissue disorders          | Skin fragility                             | 0.88497 | Chorioretinopathy               | Eye disorders                                   |
| Reproductive system and breast disorders        | Vulval oedema                              | 0.88491 | Vaginal burning sensation       | Reproductive system and breast disorders        |
| Investigations                                  | Spermatozoa progressive motility decreased | 0.88491 | Dyskinesia oesophageal          | Gastrointestinal disorders                      |
| Metabolism and nutrition disorders              | Glucose tolerance impaired                 | 0.88486 | Myopathy steroid                | Musculoskeletal and connective tissue disorders |
| Eye disorders                                   | Blepharospasm                              | 0.88486 | Anticholinergic syndrome        | Nervous system disorders                        |
| Eye disorders                                   | Exophthalmos                               | 0.88482 | Alkalosis hypokalaemic          | Metabolism and nutrition disorders              |
| Eye disorders                                   | Conjunctival bleb                          | 0.88475 | Oropharyngitis fungal           | Infections and infestations                     |
| Investigations                                  | Liver function test                        | 0.88467 | Acute respiratory failure       | Respiratory, thoracic and mediastinal disorders |
| Musculoskeletal and connective tissue disorders | Myopathy steroid                           | 0.88466 | Panniculitis                    | Skin and subcutaneous tissue disorders          |
| Skin and subcutaneous tissue disorders          | Skin fragility                             | 0.88466 | Hypertrophic cardiomyopathy     | Cardiac disorders                               |
| Endocrine disorders                             | Secondary adrenocortical insufficiency     | 0.88465 | Panniculitis                    | Skin and subcutaneous tissue disorders          |

| Basis data for network                                              |                                         |         |                                        |                                                      |
|---------------------------------------------------------------------|-----------------------------------------|---------|----------------------------------------|------------------------------------------------------|
| SOC1                                                                | AE1                                     | score   | AE2                                    | SOC2                                                 |
| Infections and infestations                                         | Oral fungal infection                   | 0.88464 | Application site atrophy               | General disorders and administration site conditions |
| Congenital, familial and genetic disorders                          | Pierre Robin syndrome                   | 0.88464 | Application site atrophy               | General disorders and administration site conditions |
| General disorders and administration site conditions                | Application site atrophy                | 0.88464 | Osteitis deformans                     | Musculoskeletal and connective tissue disorders      |
| Infections and infestations                                         | Viral upper respiratory tract infection | 0.88464 | Application site atrophy               | General disorders and administration site conditions |
| Cardiac disorders                                                   | Bradycardia neonatal                    | 0.88464 | Application site atrophy               | General disorders and administration site conditions |
| Immune system disorders                                             | Type I hypersensitivity                 | 0.88455 | Vitamin K deficiency                   | Metabolism and nutrition disorders                   |
| Immune system disorders                                             | Immunodeficiency                        | 0.88453 | Blood galactose decreased              | Investigations                                       |
| Endocrine disorders                                                 | Cushingoid                              | 0.88449 | Spinal fracture                        | Injury, poisoning and procedural complications       |
| Injury, poisoning and procedural complications                      | Spinal compression fracture             | 0.88447 | Impaired healing                       | General disorders and administration site conditions |
| Neoplasms benign, malignant and unspecified (incl cysts and polyps) | Lung adenocarcinoma                     | 0.88446 | Glomerulonephritis rapidly progressive | Renal and urinary disorders                          |
| Renal and urinary disorders                                         | Glomerulonephritis rapidly progressive  | 0.88446 | Blood uric acid                        | Investigations                                       |
| Gastrointestinal disorders                                          | Gastritis alcoholic                     | 0.88446 | Glomerulonephritis rapidly progressive | Renal and urinary disorders                          |
| Renal and urinary disorders                                         | Glomerulonephritis rapidly progressive  | 0.88446 | Vitamin D decreased                    | Investigations                                       |
| Investigations                                                      | Urine glucose false positive            | 0.88445 | Platelet function test abnormal        | Investigations                                       |
| Cardiac disorders                                                   | Arteriospasm coronary                   | 0.88445 | Encephalitis herpes                    | Infections and infestations                          |
| Cardiac disorders                                                   | Arteriospasm coronary                   | 0.88445 | Blood oestrogen increased              | Investigations                                       |
| Metabolism and nutrition disorders                                  | Catabolic state                         | 0.88441 | Adrenal suppression                    | Endocrine disorders                                  |
| Musculoskeletal and connective tissue disorders                     | Myopathy steroid                        | 0.88436 | Exophthalmos                           | Eye disorders                                        |
| General disorders and administration site conditions                | Implant expulsion                       | 0.88423 | Scrotal infection                      | Infections and infestations                          |
| Renal and urinary disorders                                         | Ureteric obstruction                    | 0.88423 | Rectal polyp                           | Gastrointestinal disorders                           |



| Basis data for network                                              |                               |         |                               |                                                      |
|---------------------------------------------------------------------|-------------------------------|---------|-------------------------------|------------------------------------------------------|
| SOC1                                                                | AE1                           | score   | AE2                           | SOC2                                                 |
| Injury, poisoning and procedural complications                      | Radius fracture               | 0.88423 | Ureteric obstruction          | Renal and urinary disorders                          |
| Infections and infestations                                         | Scrotal infection             | 0.88423 | Pleural rub                   | Respiratory, thoracic and mediastinal disorders      |
| Renal and urinary disorders                                         | Ureteric obstruction          | 0.88423 | Listeriosis                   | Infections and infestations                          |
| Injury, poisoning and procedural complications                      | Radius fracture               | 0.88423 | Ovarian atrophy               | Reproductive system and breast disorders             |
| Neoplasms benign, malignant and unspecified (incl cysts and polyps) | Throat cancer                 | 0.88423 | Ureteric obstruction          | Renal and urinary disorders                          |
| General disorders and administration site conditions                | Injection site paraesthesia   | 0.88423 | Ureteric obstruction          | Renal and urinary disorders                          |
| Injury, poisoning and procedural complications                      | Scrotal haematoma             | 0.88423 | Testis discomfort             | Reproductive system and breast disorders             |
| Injury, poisoning and procedural complications                      | Radius fracture               | 0.88423 | Scrotal haematoma             | Injury, poisoning and procedural complications       |
| Investigations                                                      | Blood growth hormone abnormal | 0.88423 | Ovarian atrophy               | Reproductive system and breast disorders             |
| Infections and infestations                                         | Listeriosis                   | 0.88423 | Scrotal infection             | Infections and infestations                          |
| Injury, poisoning and procedural complications                      | Scrotal haematoma             | 0.88423 | Blood growth hormone abnormal | Investigations                                       |
| Gastrointestinal disorders                                          | Rectal polyp                  | 0.88423 | Ovarian atrophy               | Reproductive system and breast disorders             |
| Injury, poisoning and procedural complications                      | Scrotal haematoma             | 0.88423 | Rectal polyp                  | Gastrointestinal disorders                           |
| Infections and infestations                                         | Scrotal infection             | 0.88423 | Injection site paraesthesia   | General disorders and administration site conditions |
| Infections and infestations                                         | Listeriosis                   | 0.88423 | Ovarian atrophy               | Reproductive system and breast disorders             |
| Investigations                                                      | Blood growth hormone abnormal | 0.88423 | Scrotal infection             | Infections and infestations                          |
| Neoplasms benign, malignant and unspecified (incl cysts and polyps) | Throat cancer                 | 0.88423 | Scrotal haematoma             | Injury, poisoning and procedural complications       |
| Reproductive system and breast disorders                            | Ovarian atrophy               | 0.88423 | Testis discomfort             | Reproductive system and breast disorders             |
| Respiratory, thoracic and mediastinal disorders                     | Pleural rub                   | 0.88423 | Ureteric obstruction          | Renal and urinary disorders                          |
| Respiratory, thoracic and mediastinal disorders                     | Pleural rub                   | 0.88423 | Scrotal haematoma             | Injury, poisoning and procedural complications       |

| Basis data for network                                              |                               |         |                                       |                                                                     |
|---------------------------------------------------------------------|-------------------------------|---------|---------------------------------------|---------------------------------------------------------------------|
| SOC1                                                                | AE1                           | score   | AE2                                   | SOC2                                                                |
| Injury, poisoning and procedural complications                      | Scrotal haematoma             | 0.88423 | Listeriosis                           | Infections and infestations                                         |
| Reproductive system and breast disorders                            | Ovarian atrophy               | 0.88423 | Pleural rub                           | Respiratory, thoracic and mediastinal disorders                     |
| General disorders and administration site conditions                | Implant expulsion             | 0.88423 | Ureteric obstruction                  | Renal and urinary disorders                                         |
| Infections and infestations                                         | Scrotal infection             | 0.88423 | Radius fracture                       | Injury, poisoning and procedural complications                      |
| Neoplasms benign, malignant and unspecified (incl cysts and polyps) | Throat cancer                 | 0.88423 | Ovarian atrophy                       | Reproductive system and breast disorders                            |
| Reproductive system and breast disorders                            | Testis discomfort             | 0.88423 | Ureteric obstruction                  | Renal and urinary disorders                                         |
| Infections and infestations                                         | Scrotal infection             | 0.88423 | Throat cancer                         | Neoplasms benign, malignant and unspecified (incl cysts and polyps) |
| Injury, poisoning and procedural complications                      | Scrotal haematoma             | 0.88423 | Injection site paraesthesia           | General disorders and administration site conditions                |
| Reproductive system and breast disorders                            | Testis discomfort             | 0.88423 | Scrotal infection                     | Infections and infestations                                         |
| Gastrointestinal disorders                                          | Rectal polyp                  | 0.88423 | Scrotal infection                     | Infections and infestations                                         |
| Investigations                                                      | Blood growth hormone abnormal | 0.88423 | Ureteric obstruction                  | Renal and urinary disorders                                         |
| General disorders and administration site conditions                | Implant expulsion             | 0.88423 | Ovarian atrophy                       | Reproductive system and breast disorders                            |
| General disorders and administration site conditions                | Injection site paraesthesia   | 0.88423 | Ovarian atrophy                       | Reproductive system and breast disorders                            |
| General disorders and administration site conditions                | Implant expulsion             | 0.88423 | Scrotal haematoma                     | Injury, poisoning and procedural complications                      |
| Metabolism and nutrition disorders                                  | Insulin resistance            | 0.88404 | Total cholesterol/HDL ratio increased | Investigations                                                      |
| Metabolism and nutrition disorders                                  | Insulin resistance            | 0.88404 | Gardnerella infection                 | Infections and infestations                                         |
| Metabolism and nutrition disorders                                  | Insulin resistance            | 0.88404 | Application site scar                 | General disorders and administration site conditions                |
| Investigations                                                      | Smear cervix                  | 0.88404 | Insulin resistance                    | Metabolism and nutrition disorders                                  |
| Metabolism and nutrition disorders                                  | Insulin resistance            | 0.88404 | Trichomoniasis                        | Infections and infestations                                         |
| Investigations                                                      | Biopsy endometrium            | 0.88404 | Insulin resistance                    | Metabolism and nutrition disorders                                  |

| Basis data for network                                              |                                            |         |                                             |                                                                     |
|---------------------------------------------------------------------|--------------------------------------------|---------|---------------------------------------------|---------------------------------------------------------------------|
| SOC1                                                                | AE1                                        | score   | AE2                                         | SOC2                                                                |
| Infections and infestations                                         | Application site abscess                   | 0.88404 | Insulin resistance                          | Metabolism and nutrition disorders                                  |
| General disorders and administration site conditions                | Application site anaesthesia               | 0.88404 | Insulin resistance                          | Metabolism and nutrition disorders                                  |
| General disorders and administration site conditions                | Application site discolouration            | 0.88404 | Insulin resistance                          | Metabolism and nutrition disorders                                  |
| Endocrine disorders                                                 | Cushingoid                                 | 0.88392 | Blood chromium decreased                    | Investigations                                                      |
| Endocrine disorders                                                 | Cushingoid                                 | 0.88392 | Nasal mucosa atrophy                        | Respiratory, thoracic and mediastinal disorders                     |
| Injury, poisoning and procedural complications                      | Tendon injury                              | 0.88392 | Cushingoid                                  | Endocrine disorders                                                 |
| Eye disorders                                                       | Posterior capsule opacification            | 0.88392 | Cushingoid                                  | Endocrine disorders                                                 |
| Respiratory, thoracic and mediastinal disorders                     | Laryngeal obstruction                      | 0.88392 | Cushingoid                                  | Endocrine disorders                                                 |
| Endocrine disorders                                                 | Cushingoid                                 | 0.88392 | Scleromalacia                               | Eye disorders                                                       |
| Endocrine disorders                                                 | Cushingoid                                 | 0.88392 | Chorioretinopathy                           | Eye disorders                                                       |
| Endocrine disorders                                                 | Cushingoid                                 | 0.88392 | Scoliosis                                   | Musculoskeletal and connective tissue disorders                     |
| Reproductive system and breast disorders                            | Vulvovaginal ulceration                    | 0.88360 | Vulval oedema                               | Reproductive system and breast disorders                            |
| Investigations                                                      | Spermatozoa progressive motility decreased | 0.88348 | Blood growth hormone increased              | Investigations                                                      |
| Neoplasms benign, malignant and unspecified (incl cysts and polyps) | Papilloma                                  | 0.88332 | Acute tonsillitis                           | Infections and infestations                                         |
| Infections and infestations                                         | Acute tonsillitis                          | 0.88332 | Painful defaecation                         | Gastrointestinal disorders                                          |
| Infections and infestations                                         | Diarrhoea infectious                       | 0.88332 | Acute tonsillitis                           | Infections and infestations                                         |
| Infections and infestations                                         | Brain abscess                              | 0.88330 | Dermoid cyst of ovary                       | Congenital, familial and genetic disorders                          |
| Congenital, familial and genetic disorders                          | Congenital joint malformation              | 0.88330 | Brain abscess                               | Infections and infestations                                         |
| Infections and infestations                                         | Brain abscess                              | 0.88330 | Prolactinoma                                | Neoplasms benign, malignant and unspecified (incl cysts and polyps) |
| Infections and infestations                                         | Brain abscess                              | 0.88330 | Tongue neoplasm malignant stage unspecified | Neoplasms benign, malignant and unspecified (incl cysts and polyps) |

| Basis data for network                                              |                                      |         |                                 |                                                                     |
|---------------------------------------------------------------------|--------------------------------------|---------|---------------------------------|---------------------------------------------------------------------|
| SOC1                                                                | AE1                                  | score   | AE2                             | SOC2                                                                |
| Infections and infestations                                         | Brain abscess                        | 0.88330 | Phosphenes                      | Eye disorders                                                       |
| Congenital, familial and genetic disorders                          | Neurofibromatosis                    | 0.88330 | Brain abscess                   | Infections and infestations                                         |
| Infections and infestations                                         | Brain abscess                        | 0.88330 | Anal atresia                    | Congenital, familial and genetic disorders                          |
| Infections and infestations                                         | Brain abscess                        | 0.88330 | Hepatoblastoma                  | Neoplasms benign, malignant and unspecified (incl cysts and polyps) |
| Respiratory, thoracic and mediastinal disorders                     | Acquired tracheo-oesophageal fistula | 0.88330 | Brain abscess                   | Infections and infestations                                         |
| Infections and infestations                                         | Brain abscess                        | 0.88330 | Pituitary tumour                | Neoplasms benign, malignant and unspecified (incl cysts and polyps) |
| Neoplasms benign, malignant and unspecified (incl cysts and polyps) | Glioblastoma multiforme              | 0.88330 | Brain abscess                   | Infections and infestations                                         |
| Infections and infestations                                         | Brain abscess                        | 0.88330 | Malignant hydatidiform mole     | Neoplasms benign, malignant and unspecified (incl cysts and polyps) |
| Musculoskeletal and connective tissue disorders                     | Dwarfism                             | 0.88330 | Brain abscess                   | Infections and infestations                                         |
| Infections and infestations                                         | Brain abscess                        | 0.88330 | Choriocarcinoma                 | Neoplasms benign, malignant and unspecified (incl cysts and polyps) |
| Reproductive system and breast disorders                            | Vaginal burning sensation            | 0.88328 | Vaginal swelling                | Reproductive system and breast disorders                            |
| Investigations                                                      | Electromyogram abnormal              | 0.88326 | Pylorospasm                     | Gastrointestinal disorders                                          |
| Injury, poisoning and procedural complications                      | Tendon injury                        | 0.88305 | Nitrogen balance negative       | Investigations                                                      |
| Respiratory, thoracic and mediastinal disorders                     | Laryngeal obstruction                | 0.88305 | Nitrogen balance negative       | Investigations                                                      |
| Musculoskeletal and connective tissue disorders                     | Scoliosis                            | 0.88305 | Nitrogen balance negative       | Investigations                                                      |
| Investigations                                                      | Nitrogen balance negative            | 0.88305 | Posterior capsule opacification | Eye disorders                                                       |
| Eye disorders                                                       | Chorioretinopathy                    | 0.88305 | Nitrogen balance negative       | Investigations                                                      |
| Eye disorders                                                       | Scleromalacia                        | 0.88305 | Nitrogen balance negative       | Investigations                                                      |
| Respiratory, thoracic and mediastinal disorders                     | Nasal mucosa atrophy                 | 0.88305 | Nitrogen balance negative       | Investigations                                                      |
| Investigations                                                      | Blood chromium decreased             | 0.88305 | Nitrogen balance negative       | Investigations                                                      |

| Basis data for network                               |                                |         |                                 |                                                                     |
|------------------------------------------------------|--------------------------------|---------|---------------------------------|---------------------------------------------------------------------|
| SOC1                                                 | AE1                            | score   | AE2                             | SOC2                                                                |
| Gastrointestinal disorders                           | Intestinal dilatation          | 0.88295 | Tourette's disorder             | Congenital, familial and genetic disorders                          |
| Congenital, familial and genetic disorders           | Congenital eye disorder        | 0.88294 | Ear malformation                | Congenital, familial and genetic disorders                          |
| Psychiatric disorders                                | Echolalia                      | 0.88281 | Vlth nerve paralysis            | Nervous system disorders                                            |
| Investigations                                       | Audiogram abnormal             | 0.88281 | Vlth nerve paralysis            | Nervous system disorders                                            |
| Investigations                                       | Platelet aggregation increased | 0.88280 | Pregnancy test false positive   | Investigations                                                      |
| Metabolism and nutrition disorders                   | Vitamin K deficiency           | 0.88275 | Urine potassium increased       | Investigations                                                      |
| Blood and lymphatic system disorders                 | Anaemia haemolytic autoimmune  | 0.88274 | Vitamin K deficiency            | Metabolism and nutrition disorders                                  |
| General disorders and administration site conditions | Injection site ulcer           | 0.88259 | Implant expulsion               | General disorders and administration site conditions                |
| Gastrointestinal disorders                           | Rectal polyp                   | 0.88259 | Injection site ulcer            | General disorders and administration site conditions                |
| Reproductive system and breast disorders             | Testis discomfort              | 0.88259 | Injection site ulcer            | General disorders and administration site conditions                |
| General disorders and administration site conditions | Injection site ulcer           | 0.88259 | Blood growth hormone abnormal   | Investigations                                                      |
| General disorders and administration site conditions | Injection site ulcer           | 0.88259 | Throat cancer                   | Neoplasms benign, malignant and unspecified (incl cysts and polyps) |
| General disorders and administration site conditions | Injection site ulcer           | 0.88259 | Radius fracture                 | Injury, poisoning and procedural complications                      |
| General disorders and administration site conditions | Injection site ulcer           | 0.88259 | Pleural rub                     | Respiratory, thoracic and mediastinal disorders                     |
| General disorders and administration site conditions | Injection site ulcer           | 0.88259 | Listeriosis                     | Infections and infestations                                         |
| General disorders and administration site conditions | Injection site ulcer           | 0.88259 | Injection site paraesthesia     | General disorders and administration site conditions                |
| Reproductive system and breast disorders             | Atrophic vulvovaginitis        | 0.88259 | Genital erythema                | Reproductive system and breast disorders                            |
| Reproductive system and breast disorders             | Vaginal swelling               | 0.88256 | Vaginal odour                   | Reproductive system and breast disorders                            |
| Nervous system disorders                             | Fontanelle bulging             | 0.88240 | Cataract congenital             | Congenital, familial and genetic disorders                          |
| Nervous system disorders                             | Fontanelle bulging             | 0.88240 | Tooth discolouration congenital | Congenital, familial and genetic disorders                          |

| Basis data for network                                              |                                        |         |                                        |                                                                     |
|---------------------------------------------------------------------|----------------------------------------|---------|----------------------------------------|---------------------------------------------------------------------|
| SOC1                                                                | AE1                                    | score   | AE2                                    | SOC2                                                                |
| Injury, poisoning and procedural complications                      | Spinal compression fracture            | 0.88235 | Muscle atrophy                         | Musculoskeletal and connective tissue disorders                     |
| Investigations                                                      | Alpha-1 anti-trypsin increased         | 0.88234 | Haemangioma of liver                   | Neoplasms benign, malignant and unspecified (incl cysts and polyps) |
| Investigations                                                      | Coagulation factor XII level increased | 0.88234 | Haemangioma of liver                   | Neoplasms benign, malignant and unspecified (incl cysts and polyps) |
| Neoplasms benign, malignant and unspecified (incl cysts and polyps) | Adenosquamous carcinoma of the cervix  | 0.88234 | Haemangioma of liver                   | Neoplasms benign, malignant and unspecified (incl cysts and polyps) |
| Neoplasms benign, malignant and unspecified (incl cysts and polyps) | Haemangioma of liver                   | 0.88234 | Vaginal cancer                         | Neoplasms benign, malignant and unspecified (incl cysts and polyps) |
| Neoplasms benign, malignant and unspecified (incl cysts and polyps) | Haemangioma of liver                   | 0.88234 | Coagulation factor X level increased   | Investigations                                                      |
| Reproductive system and breast disorders                            | Breast cyst                            | 0.88234 | Haemangioma of liver                   | Neoplasms benign, malignant and unspecified (incl cysts and polyps) |
| Neoplasms benign, malignant and unspecified (incl cysts and polyps) | Haemangioma of liver                   | 0.88234 | Coagulation factor VII level increased | Investigations                                                      |
| Neoplasms benign, malignant and unspecified (incl cysts and polyps) | Haemangioma of liver                   | 0.88234 | Ceruloplasmin increased                | Investigations                                                      |
| Neoplasms benign, malignant and unspecified (incl cysts and polyps) | Haemangioma of liver                   | 0.88234 | Testis cancer                          | Neoplasms benign, malignant and unspecified (incl cysts and polyps) |
| Neoplasms benign, malignant and unspecified (incl cysts and polyps) | Haemangioma of liver                   | 0.88234 | Plasminogen increased                  | Investigations                                                      |
| Neoplasms benign, malignant and unspecified (incl cysts and polyps) | Colorectal cancer                      | 0.88234 | Haemangioma of liver                   | Neoplasms benign, malignant and unspecified (incl cysts and polyps) |
| Neoplasms benign, malignant and unspecified (incl cysts and polyps) | Haemangioma of liver                   | 0.88234 | Coagulation factor IX level increased  | Investigations                                                      |
| Reproductive system and breast disorders                            | Retrograde ejaculation                 | 0.88222 | Obsessive-compulsive disorder          | Psychiatric disorders                                               |
| Nervous system disorders                                            | Facial spasm                           | 0.88216 | Obsessive-compulsive disorder          | Psychiatric disorders                                               |
| Investigations                                                      | Liver function test                    | 0.88216 | Breast engorgement                     | Reproductive system and breast disorders                            |
| Eye disorders                                                       | Cycloplegia                            | 0.88202 | Suppressed lactation                   | Reproductive system and breast disorders                            |
| Injury, poisoning and procedural complications                      | Spinal fracture                        | 0.88194 | Large intestine perforation            | Gastrointestinal disorders                                          |

| Basis data for network |                     |         |             |                                        |
|------------------------|---------------------|---------|-------------|----------------------------------------|
| SOC1                   | AE1                 | score   | AE2         | SOC2                                   |
| Eye disorders          | Exophthalmos        | 0.88188 | Fat atrophy | Skin and subcutaneous tissue disorders |
| Endocrine disorders    | Adrenal suppression | 0.88183 | Skin striae | Skin and subcutaneous tissue disorders |

| Basis data for network                          |                                            |         |                                 |                                                 |
|-------------------------------------------------|--------------------------------------------|---------|---------------------------------|-------------------------------------------------|
| SOC1                                            | AE1                                        | score   | AE2                             | SOC2                                            |
| Congenital, familial and genetic disorders      | Limb reduction defect                      | 0.88181 | Acute respiratory failure       | Respiratory, thoracic and mediastinal disorders |
| Cardiac disorders                               | Dressler's syndrome                        | 0.88165 | Blood aldosterone decreased     | Investigations                                  |
| Investigations                                  | Blood aldosterone decreased                | 0.88165 | Proctitis haemorrhagic          | Gastrointestinal disorders                      |
| Skin and subcutaneous tissue disorders          | Male pattern baldness                      | 0.88164 | Thrombin time prolonged         | Investigations                                  |
| Investigations                                  | Coombs direct test positive                | 0.88159 | Platelet function test abnormal | Investigations                                  |
| Musculoskeletal and connective tissue disorders | Neuropathic arthropathy                    | 0.88157 | Hypopituitarism                 | Endocrine disorders                             |
| Infections and infestations                     | Corneal infection                          | 0.88157 | Body fat disorder               | Metabolism and nutrition disorders              |
| Investigations                                  | Spermatozoa progressive motility decreased | 0.88153 | Aspermia                        | Reproductive system and breast disorders        |
| Psychiatric disorders                           | Obsessive-compulsive disorder              | 0.88145 | Laryngeal disorder              | Respiratory, thoracic and mediastinal disorders |
| Vascular disorders                              | Aortic aneurysm                            | 0.88132 | Spinal fracture                 | Injury, poisoning and procedural complications  |
| Psychiatric disorders                           | Orgasm abnormal                            | 0.88117 | Intestinal dilatation           | Gastrointestinal disorders                      |
| Endocrine disorders                             | Cushingoid                                 | 0.88111 | Hypertrophic cardiomyopathy     | Cardiac disorders                               |
| Gastrointestinal disorders                      | Peptic ulcer perforation                   | 0.88101 | Spinal compression fracture     | Injury, poisoning and procedural complications  |
| Gastrointestinal disorders                      | Reflux oesophagitis                        | 0.88101 | Cutaneous lupus erythematosus   | Skin and subcutaneous tissue disorders          |
| Metabolism and nutrition disorders              | Alkalosis hypokalaemic                     | 0.88100 | Cerebral venous thrombosis      | Nervous system disorders                        |
| Eye disorders                                   | Retinal pigmentation                       | 0.88096 | Acute respiratory failure       | Respiratory, thoracic and mediastinal disorders |
| Skin and subcutaneous tissue disorders          | Fat atrophy                                | 0.88093 | Virilism                        | Endocrine disorders                             |
| Endocrine disorders                             | Adrenocortical insufficiency acute         | 0.88087 | Peptic ulcer perforation        | Gastrointestinal disorders                      |
| Nervous system disorders                        | Serotonin syndrome                         | 0.88087 | Anorgasmia                      | Psychiatric disorders                           |
| Infections and infestations                     | Soft tissue infection                      | 0.88086 | Menstrual discomfort            | Reproductive system and breast disorders        |



| Basis data for network                     |                                               |         |                                        |                                                                     |
|--------------------------------------------|-----------------------------------------------|---------|----------------------------------------|---------------------------------------------------------------------|
| SOC1                                       | AE1                                           | score   | AE2                                    | SOC2                                                                |
| Infections and infestations                | Soft tissue infection                         | 0.88086 | Brain neoplasm benign                  | Neoplasms benign, malignant and unspecified (incl cysts and polyps) |
| Infections and infestations                | Soft tissue infection                         | 0.88086 | Malignant ovarian cyst                 | Reproductive system and breast disorders                            |
| Congenital, familial and genetic disorders | Tourette's disorder                           | 0.88083 | Injection site nodule                  | General disorders and administration site conditions                |
| Reproductive system and breast disorders   | Erection increased                            | 0.88080 | Peliosis hepatis                       | Hepatobiliary disorders                                             |
| Reproductive system and breast disorders   | Ejaculation failure                           | 0.88075 | Retrograde ejaculation                 | Reproductive system and breast disorders                            |
| Endocrine disorders                        | Virilism                                      | 0.88062 | Alkalosis hypokalaemic                 | Metabolism and nutrition disorders                                  |
| Metabolism and nutrition disorders         | Glucose tolerance impaired                    | 0.88062 | Adrenocortical insufficiency acute     | Endocrine disorders                                                 |
| Skin and subcutaneous tissue disorders     | Leukoderma                                    | 0.88062 | Panniculitis                           | Skin and subcutaneous tissue disorders                              |
| Investigations                             | Nitrogen balance negative                     | 0.88040 | Catabolic state                        | Metabolism and nutrition disorders                                  |
| Investigations                             | Blood growth hormone increased                | 0.88038 | Injection site abscess                 | Infections and infestations                                         |
| Metabolism and nutrition disorders         | Fluid imbalance                               | 0.88032 | Grey syndrome neonatal                 | Cardiac disorders                                                   |
| Skin and subcutaneous tissue disorders     | Sweat discolouration                          | 0.88031 | Tear discolouration                    | Eye disorders                                                       |
| Skin and subcutaneous tissue disorders     | Sweat discolouration                          | 0.88031 | Urine vitamin K decreased              | Investigations                                                      |
| Skin and subcutaneous tissue disorders     | Red man syndrome                              | 0.88031 | Sweat discolouration                   | Skin and subcutaneous tissue disorders                              |
| Skin and subcutaneous tissue disorders     | Sweat discolouration                          | 0.88031 | Saliva discolouration                  | Gastrointestinal disorders                                          |
| Investigations                             | Blood 1,25-dihydroxycholecalciferol decreased | 0.88031 | Sweat discolouration                   | Skin and subcutaneous tissue disorders                              |
| Blood and lymphatic system disorders       | Hypercoagulation                              | 0.88029 | Secondary adrenocortical insufficiency | Endocrine disorders                                                 |
| Psychiatric disorders                      | Pseudodementia                                | 0.88029 | Polycystic ovaries                     | Reproductive system and breast disorders                            |
| Reproductive system and breast disorders   | Polycystic ovaries                            | 0.88029 | Bleeding time abnormal                 | Investigations                                                      |
| Metabolism and nutrition disorders         | Carnitine deficiency                          | 0.88029 | Polycystic ovaries                     | Reproductive system and breast disorders                            |

| Basis data for network                          |                                        |         |                                    |                                                 |
|-------------------------------------------------|----------------------------------------|---------|------------------------------------|-------------------------------------------------|
| SOC1                                            | AE1                                    | score   | AE2                                | SOC2                                            |
| Cardiac disorders                               | Grey syndrome neonatal                 | 0.88023 | Nitrogen balance negative          | Investigations                                  |
| Metabolism and nutrition disorders              | Alkalosis hypokalaemic                 | 0.88021 | Hypercoagulation                   | Blood and lymphatic system disorders            |
| Reproductive system and breast disorders        | Breast engorgement                     | 0.88019 | Limb reduction defect              | Congenital, familial and genetic disorders      |
| Reproductive system and breast disorders        | Cervical discharge                     | 0.88017 | Contact lens intolerance           | Eye disorders                                   |
| Metabolism and nutrition disorders              | Hypercatabolism                        | 0.88014 | Catabolic state                    | Metabolism and nutrition disorders              |
| Psychiatric disorders                           | Stereotypic movement disorder          | 0.88007 | Platelet aggregation increased     | Investigations                                  |
| Reproductive system and breast disorders        | Retrograde ejaculation                 | 0.88004 | Breast engorgement                 | Reproductive system and breast disorders        |
| Nervous system disorders                        | Myelopathy                             | 0.88000 | Scleral disorder                   | Eye disorders                                   |
| Nervous system disorders                        | Myelopathy                             | 0.88000 | Intraocular pressure test abnormal | Investigations                                  |
| Metabolism and nutrition disorders              | Glucose tolerance impaired             | 0.88000 | Spinal compression fracture        | Injury, poisoning and procedural complications  |
| Endocrine disorders                             | Secondary adrenocortical insufficiency | 0.87979 | Cerebral venous thrombosis         | Nervous system disorders                        |
| Respiratory, thoracic and mediastinal disorders | Asphyxia                               | 0.87969 | Obsessive-compulsive disorder      | Psychiatric disorders                           |
| Metabolism and nutrition disorders              | Alkalosis hypokalaemic                 | 0.87957 | Large intestine perforation        | Gastrointestinal disorders                      |
| Injury, poisoning and procedural complications  | Spinal compression fracture            | 0.87949 | Exophthalmos                       | Eye disorders                                   |
| Cardiac disorders                               | Myocardial rupture                     | 0.87949 | Skin fragility                     | Skin and subcutaneous tissue disorders          |
| Cardiac disorders                               | Accelerated idioventricular rhythm     | 0.87944 | Arteriospasm coronary              | Cardiac disorders                               |
| Nervous system disorders                        | Neuroleptic malignant syndrome         | 0.87943 | Choreoathetosis                    | Nervous system disorders                        |
| Investigations                                  | Blood growth hormone increased         | 0.87943 | Acute respiratory failure          | Respiratory, thoracic and mediastinal disorders |
| Nervous system disorders                        | Cerebral venous thrombosis             | 0.87939 | Spinal compression fracture        | Injury, poisoning and procedural complications  |
| Metabolism and nutrition disorders              | Catabolic state                        | 0.87939 | Skin fragility                     | Skin and subcutaneous tissue disorders          |

| Basis data for network                               |                                               |         |                                      |                                                                     |
|------------------------------------------------------|-----------------------------------------------|---------|--------------------------------------|---------------------------------------------------------------------|
| SOC1                                                 | AE1                                           | score   | AE2                                  | SOC2                                                                |
| Psychiatric disorders                                | Hypomania                                     | 0.87936 | Serotonin syndrome                   | Nervous system disorders                                            |
| Investigations                                       | Protein total increased                       | 0.87913 | Mean cell haemoglobin decreased      | Investigations                                                      |
| Investigations                                       | Protein total increased                       | 0.87913 | Pupillary disorder                   | Eye disorders                                                       |
| General disorders and administration site conditions | Secretion discharge                           | 0.87913 | Protein total increased              | Investigations                                                      |
| Investigations                                       | Mean cell haemoglobin concentration increased | 0.87913 | Protein total increased              | Investigations                                                      |
| Investigations                                       | PCO2 increased                                | 0.87913 | Protein total increased              | Investigations                                                      |
| Eye disorders                                        | Extraocular muscle paresis                    | 0.87913 | Protein total increased              | Investigations                                                      |
| Renal and urinary disorders                          | Renal papillary necrosis                      | 0.87909 | Dermatitis atopic                    | Skin and subcutaneous tissue disorders                              |
| Investigations                                       | Urine calcium increased                       | 0.87902 | Grey syndrome neonatal               | Cardiac disorders                                                   |
| Skin and subcutaneous tissue disorders               | Heat rash                                     | 0.87898 | Skin maceration                      | Skin and subcutaneous tissue disorders                              |
| Gastrointestinal disorders                           | Large intestine perforation                   | 0.87896 | Catabolic state                      | Metabolism and nutrition disorders                                  |
| Gastrointestinal disorders                           | Hyperchlorhydria                              | 0.87896 | Parkinsonian gait                    | Nervous system disorders                                            |
| Endocrine disorders                                  | Cushingoid                                    | 0.87883 | Catabolic state                      | Metabolism and nutrition disorders                                  |
| Eye disorders                                        | Retinal pigmentation                          | 0.87882 | Areflexia                            | Nervous system disorders                                            |
| Gastrointestinal disorders                           | Dyskinesia oesophageal                        | 0.87880 | Orgasm abnormal                      | Psychiatric disorders                                               |
| Congenital, familial and genetic disorders           | Tourette's disorder                           | 0.87874 | Blood antidiuretic hormone increased | Investigations                                                      |
| Eye disorders                                        | Angle closure glaucoma                        | 0.87863 | Retrograde amnesia                   | Nervous system disorders                                            |
| Investigations                                       | Sperm count increased                         | 0.87853 | Platelet aggregation increased       | Investigations                                                      |
| Respiratory, thoracic and mediastinal disorders      | Acute respiratory failure                     | 0.87840 | Sperm count increased                | Investigations                                                      |
| Reproductive system and breast disorders             | Cervical polyp                                | 0.87834 | Benign uterine neoplasm              | Neoplasms benign, malignant and unspecified (incl cysts and polyps) |

| Basis data for network                          |                                            |         |                                |                                                |
|-------------------------------------------------|--------------------------------------------|---------|--------------------------------|------------------------------------------------|
| SOC1                                            | AE1                                        | score   | AE2                            | SOC2                                           |
| Endocrine disorders                             | Adrenal suppression                        | 0.87830 | Cushingoid                     | Endocrine disorders                            |
| Renal and urinary disorders                     | Bilirubinuria                              | 0.87828 | Graft versus host disease      | Immune system disorders                        |
| Injury, poisoning and procedural complications  | Tongue injury                              | 0.87815 | Splenic artery aneurysm        | Gastrointestinal disorders                     |
| Injury, poisoning and procedural complications  | Tongue injury                              | 0.87815 | Rectal stenosis                | Gastrointestinal disorders                     |
| Investigations                                  | Platelet aggregation increased             | 0.87809 | Retrograde ejaculation         | Reproductive system and breast disorders       |
| Nervous system disorders                        | Facial spasm                               | 0.87784 | Tongue paralysis               | Nervous system disorders                       |
| Investigations                                  | Spermatozoa progressive motility decreased | 0.87783 | Pregnancy test false positive  | Investigations                                 |
| Eye disorders                                   | Retinal dystrophy                          | 0.87763 | CSF protein abnormal           | Investigations                                 |
| Endocrine disorders                             | Virilism                                   | 0.87758 | Panniculitis                   | Skin and subcutaneous tissue disorders         |
| Skin and subcutaneous tissue disorders          | Skin fragility                             | 0.87753 | Grey syndrome neonatal         | Cardiac disorders                              |
| Musculoskeletal and connective tissue disorders | Myopathy steroid                           | 0.87751 | Large intestine perforation    | Gastrointestinal disorders                     |
| Nervous system disorders                        | Tongue paralysis                           | 0.87751 | Blood growth hormone increased | Investigations                                 |
| Nervous system disorders                        | Tongue paralysis                           | 0.87751 | Pregnancy test false positive  | Investigations                                 |
| Pregnancy, puerperium and perinatal conditions  | Antepartum haemorrhage                     | 0.87751 | Foetal cardiac disorder        | Pregnancy, puerperium and perinatal conditions |
| Pregnancy, puerperium and perinatal conditions  | Delayed delivery                           | 0.87751 | Foetal cardiac disorder        | Pregnancy, puerperium and perinatal conditions |
| Pregnancy, puerperium and perinatal conditions  | Foetal cardiac disorder                    | 0.87751 | Labour complication            | Pregnancy, puerperium and perinatal conditions |
| Musculoskeletal and connective tissue disorders | Myopathy steroid                           | 0.87749 | Virilism                       | Endocrine disorders                            |
| Infections and infestations                     | Intestinal gangrene                        | 0.87748 | Defaecation urgency            | Gastrointestinal disorders                     |
| Eye disorders                                   | Cataract subcapsular                       | 0.87741 | Hypercatabolism                | Metabolism and nutrition disorders             |
| Gastrointestinal disorders                      | Peptic ulcer perforation                   | 0.87736 | Hypopituitarism                | Endocrine disorders                            |

| Basis data for network                               |                                         |         |                                 |                                                      |
|------------------------------------------------------|-----------------------------------------|---------|---------------------------------|------------------------------------------------------|
| SOC1                                                 | AE1                                     | score   | AE2                             | SOC2                                                 |
| Respiratory, thoracic and mediastinal disorders      | Pulmonary mass                          | 0.87718 | Lung abscess                    | Infections and infestations                          |
| Respiratory, thoracic and mediastinal disorders      | Pulmonary mass                          | 0.87718 | Pulmonary tuberculosis          | Infections and infestations                          |
| Respiratory, thoracic and mediastinal disorders      | Pulmonary mass                          | 0.87718 | Haemophilus sepsis              | Infections and infestations                          |
| Investigations                                       | Coagulation factor VIII level increased | 0.87715 | Retinal vascular thrombosis     | Eye disorders                                        |
| Reproductive system and breast disorders             | Enlarged clitoris                       | 0.87715 | Virilism foetal                 | Congenital, familial and genetic disorders           |
| Reproductive system and breast disorders             | Vaginal swelling                        | 0.87702 | Bloody discharge                | General disorders and administration site conditions |
| General disorders and administration site conditions | Nonspecific reaction                    | 0.87702 | Vaginal swelling                | Reproductive system and breast disorders             |
| Musculoskeletal and connective tissue disorders      | Myopathy steroid                        | 0.87701 | Cerebral venous thrombosis      | Nervous system disorders                             |
| Congenital, familial and genetic disorders           | Tourette's disorder                     | 0.87688 | Dyskinesia oesophageal          | Gastrointestinal disorders                           |
| Injury, poisoning and procedural complications       | Spinal compression fracture             | 0.87684 | Large intestine perforation     | Gastrointestinal disorders                           |
| Metabolism and nutrition disorders                   | Catabolic state                         | 0.87670 | Skin depigmentation             | Skin and subcutaneous tissue disorders               |
| Nervous system disorders                             | Carotid artery disease                  | 0.87667 | Arterial stenosis               | Vascular disorders                                   |
| Psychiatric disorders                                | Obsessive-compulsive disorder           | 0.87660 | Retinal pigmentation            | Eye disorders                                        |
| Metabolism and nutrition disorders                   | Alkalosis hypokalaemic                  | 0.87652 | Hip fracture                    | Injury, poisoning and procedural complications       |
| Infections and infestations                          | Corneal infection                       | 0.87647 | Large intestine perforation     | Gastrointestinal disorders                           |
| Blood and lymphatic system disorders                 | Hypercoagulation                        | 0.87644 | Myopathy steroid                | Musculoskeletal and connective tissue disorders      |
| Immune system disorders                              | Type I hypersensitivity                 | 0.87632 | Platelet function test abnormal | Investigations                                       |
| Gastrointestinal disorders                           | Large intestine perforation             | 0.87625 | Grey syndrome neonatal          | Cardiac disorders                                    |
| Metabolism and nutrition disorders                   | Fluid imbalance                         | 0.87623 | Hip fracture                    | Injury, poisoning and procedural complications       |
| Nervous system disorders                             | Facial spasm                            | 0.87620 | Orgasm abnormal                 | Psychiatric disorders                                |

| Basis data for network                                              |                               |         |                                        |                                                                     |
|---------------------------------------------------------------------|-------------------------------|---------|----------------------------------------|---------------------------------------------------------------------|
| SOC1                                                                | AE1                           | score   | AE2                                    | SOC2                                                                |
| Injury, poisoning and procedural complications                      | Hip fracture                  | 0.87620 | Secondary adrenocortical insufficiency | Endocrine disorders                                                 |
| Investigations                                                      | Progesterone increased        | 0.87609 | Monoplegia                             | Nervous system disorders                                            |
| Cardiac disorders                                                   | Hypertrophic cardiomyopathy   | 0.87606 | Grey syndrome neonatal                 | Cardiac disorders                                                   |
| Psychiatric disorders                                               | Stereotypic movement disorder | 0.87605 | Obsessive-compulsive disorder          | Psychiatric disorders                                               |
| Gastrointestinal disorders                                          | Gastrointestinal ischaemia    | 0.87600 | Carotid artery disease                 | Nervous system disorders                                            |
| Endocrine disorders                                                 | Cushing's syndrome            | 0.87599 | Heat rash                              | Skin and subcutaneous tissue disorders                              |
| Metabolism and nutrition disorders                                  | Iron deficiency               | 0.87583 | Renal abscess                          | Infections and infestations                                         |
| Endocrine disorders                                                 | Pituitary haemorrhage         | 0.87583 | Iron deficiency                        | Metabolism and nutrition disorders                                  |
| Metabolism and nutrition disorders                                  | Iron deficiency               | 0.87583 | Bladder papilloma                      | Neoplasms benign, malignant and unspecified (incl cysts and polyps) |
| Metabolism and nutrition disorders                                  | Iron deficiency               | 0.87583 | Microlithiasis                         | General disorders and administration site conditions                |
| Neoplasms benign, malignant and unspecified (incl cysts and polyps) | Biliary neoplasm              | 0.87583 | Iron deficiency                        | Metabolism and nutrition disorders                                  |
| Metabolism and nutrition disorders                                  | Iron deficiency               | 0.87583 | Biliary dilatation                     | Hepatobiliary disorders                                             |
| Injury, poisoning and procedural complications                      | Spinal compression fracture   | 0.87579 | Virilism                               | Endocrine disorders                                                 |
| Endocrine disorders                                                 | Cushingoid                    | 0.87575 | Leukoderma                             | Skin and subcutaneous tissue disorders                              |
| Musculoskeletal and connective tissue disorders                     | Neuropathic arthropathy       | 0.87574 | Skin fragility                         | Skin and subcutaneous tissue disorders                              |
| Skin and subcutaneous tissue disorders                              | Skin atrophy                  | 0.87569 | Cushing's syndrome                     | Endocrine disorders                                                 |
| Psychiatric disorders                                               | Orgasm abnormal               | 0.87566 | Aspermia                               | Reproductive system and breast disorders                            |
| Eye disorders                                                       | Glare                         | 0.87556 | Depression suicidal                    | Psychiatric disorders                                               |
| Psychiatric disorders                                               | Depression suicidal           | 0.87556 | Conjunctival cyst                      | Eye disorders                                                       |
| Investigations                                                      | Biopsy thyroid gland abnormal | 0.87552 | Tooth discolouration congenital        | Congenital, familial and genetic disorders                          |

| Basis data for network                          |                                |         |                                    |                                                                     |
|-------------------------------------------------|--------------------------------|---------|------------------------------------|---------------------------------------------------------------------|
| SOC1                                            | AE1                            | score   | AE2                                | SOC2                                                                |
| Congenital, familial and genetic disorders      | Cataract congenital            | 0.87552 | Biopsy thyroid gland abnormal      | Investigations                                                      |
| Investigations                                  | Protein total increased        | 0.87544 | Pyogenic granuloma                 | Neoplasms benign, malignant and unspecified (incl cysts and polyps) |
| Injury, poisoning and procedural complications  | Spinal compression fracture    | 0.87543 | Hypercoagulation                   | Blood and lymphatic system disorders                                |
| Nervous system disorders                        | Neuroleptic malignant syndrome | 0.87533 | Akathisia                          | Nervous system disorders                                            |
| Blood and lymphatic system disorders            | Anaemia haemolytic autoimmune  | 0.87529 | Platelet function test abnormal    | Investigations                                                      |
| Congenital, familial and genetic disorders      | Tourette's disorder            | 0.87517 | Retrograde ejaculation             | Reproductive system and breast disorders                            |
| Gastrointestinal disorders                      | Oral mucosa atrophy            | 0.87516 | Blood galactose decreased          | Investigations                                                      |
| Investigations                                  | Blood galactose decreased      | 0.87516 | Oral neoplasm                      | Neoplasms benign, malignant and unspecified (incl cysts and polyps) |
| Gastrointestinal disorders                      | Pylorospasm                    | 0.87507 | Inappropriate affect               | Psychiatric disorders                                               |
| Infections and infestations                     | Respiratory moniliasis         | 0.87503 | Hepatic infarction                 | Hepatobiliary disorders                                             |
| Gastrointestinal disorders                      | Pancreatic fistula             | 0.87503 | Hepatic infarction                 | Hepatobiliary disorders                                             |
| Hepatobiliary disorders                         | Hepatic infarction             | 0.87503 | Peritoneal fibrosis                | Gastrointestinal disorders                                          |
| Infections and infestations                     | Pulmonary tuberculosis         | 0.87497 | Pylorospasm                        | Gastrointestinal disorders                                          |
| Infections and infestations                     | Haemophilus sepsis             | 0.87497 | Pylorospasm                        | Gastrointestinal disorders                                          |
| Infections and infestations                     | Lung abscess                   | 0.87497 | Pylorospasm                        | Gastrointestinal disorders                                          |
| Endocrine disorders                             | Hypopituitarism                | 0.87494 | Growth retardation                 | Musculoskeletal and connective tissue disorders                     |
| Skin and subcutaneous tissue disorders          | Fat atrophy                    | 0.87494 | Adrenal suppression                | Endocrine disorders                                                 |
| Investigations                                  | Blood insulin decreased        | 0.87487 | Hyperinsulinaemia                  | Metabolism and nutrition disorders                                  |
| Metabolism and nutrition disorders              | Body fat disorder              | 0.87486 | Adrenocortical insufficiency acute | Endocrine disorders                                                 |
| Musculoskeletal and connective tissue disorders | Joint effusion                 | 0.87482 | Vitamin B12 decreased              | Investigations                                                      |

| Basis data for network                     |                                      |         |                                        |                                                      |
|--------------------------------------------|--------------------------------------|---------|----------------------------------------|------------------------------------------------------|
| SOC1                                       | AE1                                  | score   | AE2                                    | SOC2                                                 |
| Metabolism and nutrition disorders         | Body fat disorder                    | 0.87466 | Grey syndrome neonatal                 | Cardiac disorders                                    |
| Investigations                             | Blood growth hormone increased       | 0.87464 | Platelet aggregation increased         | Investigations                                       |
| Reproductive system and breast disorders   | Aspermia                             | 0.87456 | Tourette's disorder                    | Congenital, familial and genetic disorders           |
| Congenital, familial and genetic disorders | Dentofacial anomaly                  | 0.87449 | Neonatal hypotension                   | Vascular disorders                                   |
| Congenital, familial and genetic disorders | Dentofacial anomaly                  | 0.87449 | Pulmonary hypoplasia                   | Congenital, familial and genetic disorders           |
| Skin and subcutaneous tissue disorders     | Leukoderma                           | 0.87449 | Cataract subcapsular                   | Eye disorders                                        |
| Skin and subcutaneous tissue disorders     | Leukoderma                           | 0.87435 | Fat atrophy                            | Skin and subcutaneous tissue disorders               |
| Gastrointestinal disorders                 | Oesophageal pain                     | 0.87417 | Choluria                               | Renal and urinary disorders                          |
| Infections and infestations                | Dysentery                            | 0.87417 | Oesophageal pain                       | Gastrointestinal disorders                           |
| Skin and subcutaneous tissue disorders     | Skin maceration                      | 0.87409 | Skin atrophy                           | Skin and subcutaneous tissue disorders               |
| Investigations                             | Basophil count abnormal              | 0.87371 | Granulocyte count increased            | Investigations                                       |
| Investigations                             | Urine potassium increased            | 0.87354 | Platelet function test abnormal        | Investigations                                       |
| Gastrointestinal disorders                 | Large intestine perforation          | 0.87344 | Secondary adrenocortical insufficiency | Endocrine disorders                                  |
| Endocrine disorders                        | Adrenal suppression                  | 0.87322 | Spinal fracture                        | Injury, poisoning and procedural complications       |
| Cardiac disorders                          | Grey syndrome neonatal               | 0.87320 | Aortic aneurysm                        | Vascular disorders                                   |
| Investigations                             | Blood growth hormone increased       | 0.87303 | Tourette's disorder                    | Congenital, familial and genetic disorders           |
| Psychiatric disorders                      | Orgasm abnormal                      | 0.87301 | Injection site nodule                  | General disorders and administration site conditions |
| Investigations                             | Aspartate aminotransferase increased | 0.87301 | Alanine aminotransferase increased     | Investigations                                       |
| Eye disorders                              | Conjunctival bleb                    | 0.87299 | Hypertrophic cardiomyopathy            | Cardiac disorders                                    |
| Nervous system disorders                   | Neuromuscular toxicity               | 0.87299 | Hypocapnia                             | Respiratory, thoracic and mediastinal disorders      |



| Basis data for network                          |                                        |         |                                    |                                                      |
|-------------------------------------------------|----------------------------------------|---------|------------------------------------|------------------------------------------------------|
| SOC1                                            | AE1                                    | score   | AE2                                | SOC2                                                 |
| Investigations                                  | Urine calcium increased                | 0.87295 | Adrenocortical insufficiency acute | Endocrine disorders                                  |
| Infections and infestations                     | Corneal infection                      | 0.87289 | Skin depigmentation                | Skin and subcutaneous tissue disorders               |
| Hepatobiliary disorders                         | Peliosis hepatis                       | 0.87289 | Virilism foetal                    | Congenital, familial and genetic disorders           |
| Metabolism and nutrition disorders              | Alkalosis hypokalaemic                 | 0.87274 | Impaired healing                   | General disorders and administration site conditions |
| Endocrine disorders                             | Secondary adrenocortical insufficiency | 0.87270 | Myocardial rupture                 | Cardiac disorders                                    |
| Renal and urinary disorders                     | Hyperphosphaturia                      | 0.87263 | Biopsy thyroid gland abnormal      | Investigations                                       |
| Injury, poisoning and procedural complications  | Hip fracture                           | 0.87258 | Myopathy steroid                   | Musculoskeletal and connective tissue disorders      |
| Reproductive system and breast disorders        | Vulval erythema                        | 0.87250 | Vaginal burning sensation          | Reproductive system and breast disorders             |
| Gastrointestinal disorders                      | Oesophagitis ulcerative                | 0.87249 | Papilloedema                       | Eye disorders                                        |
| Eye disorders                                   | Cataract subcapsular                   | 0.87240 | Neuropathic arthropathy            | Musculoskeletal and connective tissue disorders      |
| Respiratory, thoracic and mediastinal disorders | Aspiration                             | 0.87240 | Asphyxia                           | Respiratory, thoracic and mediastinal disorders      |
| Nervous system disorders                        | Tongue paralysis                       | 0.87227 | Liver function test                | Investigations                                       |
| Endocrine disorders                             | Secondary adrenocortical insufficiency | 0.87222 | Peptic ulcer perforation           | Gastrointestinal disorders                           |
| Nervous system disorders                        | Cerebral venous thrombosis             | 0.87204 | Cataract subcapsular               | Eye disorders                                        |
| Skin and subcutaneous tissue disorders          | Elastosis perforans                    | 0.87203 | Hypogeusia                         | Nervous system disorders                             |
| Psychiatric disorders                           | Learning disorder                      | 0.87201 | Global amnesia                     | Nervous system disorders                             |
| Skin and subcutaneous tissue disorders          | Skin warm                              | 0.87193 | Cutaneous lupus erythematosus      | Skin and subcutaneous tissue disorders               |
| Musculoskeletal and connective tissue disorders | Myopathy steroid                       | 0.87180 | Impaired healing                   | General disorders and administration site conditions |
| Metabolism and nutrition disorders              | Alkalosis hypokalaemic                 | 0.87173 | Muscle atrophy                     | Musculoskeletal and connective tissue disorders      |
| Metabolism and nutrition disorders              | Alkalosis hypochloraemic               | 0.87158 | Haemoconcentration                 | Blood and lymphatic system disorders                 |

| Basis data for network                               |                                   |         |                                |                                                      |
|------------------------------------------------------|-----------------------------------|---------|--------------------------------|------------------------------------------------------|
| SOC1                                                 | AE1                               | score   | AE2                            | SOC2                                                 |
| General disorders and administration site conditions | Drug withdrawal syndrome neonatal | 0.87157 | Antisocial behaviour           | Psychiatric disorders                                |
| Vascular disorders                                   | Aortic aneurysm                   | 0.87148 | Cerebral venous thrombosis     | Nervous system disorders                             |
| Nervous system disorders                             | Facial spasm                      | 0.87144 | Platelet aggregation increased | Investigations                                       |
| Reproductive system and breast disorders             | Menopausal disorder               | 0.87144 | Conjunctival bleb              | Eye disorders                                        |
| Musculoskeletal and connective tissue disorders      | Muscle atrophy                    | 0.87137 | Myopathy steroid               | Musculoskeletal and connective tissue disorders      |
| Cardiac disorders                                    | Myocardial rupture                | 0.87101 | Cataract subcapsular           | Eye disorders                                        |
| Metabolism and nutrition disorders                   | Hypercatabolism                   | 0.87099 | Skin fragility                 | Skin and subcutaneous tissue disorders               |
| Metabolism and nutrition disorders                   | Hypercatabolism                   | 0.87088 | Peptic ulcer perforation       | Gastrointestinal disorders                           |
| Injury, poisoning and procedural complications       | Spinal compression fracture       | 0.87088 | Hip fracture                   | Injury, poisoning and procedural complications       |
| Gastrointestinal disorders                           | Tongue spasm                      | 0.87086 | Rectal ulcer                   | Gastrointestinal disorders                           |
| Gastrointestinal disorders                           | Intestinal dilatation             | 0.87069 | Areflexia                      | Nervous system disorders                             |
| Endocrine disorders                                  | Virilism                          | 0.87065 | Hip fracture                   | Injury, poisoning and procedural complications       |
| Respiratory, thoracic and mediastinal disorders      | Acute respiratory failure         | 0.87063 | Laryngeal disorder             | Respiratory, thoracic and mediastinal disorders      |
| Injury, poisoning and procedural complications       | Spinal fracture                   | 0.87051 | Injection site abscess sterile | General disorders and administration site conditions |
| General disorders and administration site conditions | Instillation site irritation      | 0.87041 | Oral mucosal blistering        | Gastrointestinal disorders                           |
| Gastrointestinal disorders                           | Oral mucosal blistering           | 0.87041 | Ear haemorrhage                | Ear and labyrinth disorders                          |
| Infections and infestations                          | Conjunctivitis viral              | 0.87041 | Oral mucosal blistering        | Gastrointestinal disorders                           |
| Gastrointestinal disorders                           | Oral mucosal blistering           | 0.87041 | Instillation site pain         | General disorders and administration site conditions |
| Gastrointestinal disorders                           | Oral mucosal blistering           | 0.87041 | Chemical eye injury            | Injury, poisoning and procedural complications       |
| Injury, poisoning and procedural complications       | Ear canal injury                  | 0.87041 | Oral mucosal blistering        | Gastrointestinal disorders                           |

| Basis data for network                          |                                 |         |                                        |                                                 |
|-------------------------------------------------|---------------------------------|---------|----------------------------------------|-------------------------------------------------|
| SOC1                                            | AE1                             | score   | AE2                                    | SOC2                                            |
| Metabolism and nutrition disorders              | Glucose tolerance impaired      | 0.87039 | Secondary adrenocortical insufficiency | Endocrine disorders                             |
| Respiratory, thoracic and mediastinal disorders | Nasal septum disorder           | 0.87031 | Hypercorticism                         | Endocrine disorders                             |
| Skin and subcutaneous tissue disorders          | Skin depigmentation             | 0.87029 | Spinal fracture                        | Injury, poisoning and procedural complications  |
| Skin and subcutaneous tissue disorders          | Leukoderma                      | 0.87028 | Aortic aneurysm                        | Vascular disorders                              |
| Cardiac disorders                               | Endocardial disease             | 0.87024 | Reticuloendothelial dysfunction        | Blood and lymphatic system disorders            |
| Blood and lymphatic system disorders            | Reticuloendothelial dysfunction | 0.87024 | Anti-platelet antibody positive        | Investigations                                  |
| Injury, poisoning and procedural complications  | Post procedural haematoma       | 0.87024 | Reticuloendothelial dysfunction        | Blood and lymphatic system disorders            |
| Endocrine disorders                             | Adrenal haemorrhage             | 0.87024 | Reticuloendothelial dysfunction        | Blood and lymphatic system disorders            |
| Musculoskeletal and connective tissue disorders | Bone formation decreased        | 0.87023 | Eczema infected                        | Infections and infestations                     |
| Investigations                                  | Creatinine urine decreased      | 0.87023 | Bone formation decreased               | Musculoskeletal and connective tissue disorders |
| Musculoskeletal and connective tissue disorders | Bone formation decreased        | 0.87023 | Myringitis                             | Infections and infestations                     |
| Musculoskeletal and connective tissue disorders | Bone formation decreased        | 0.87023 | Pharyngeal candidiasis                 | Infections and infestations                     |
| Infections and infestations                     | Herpetic stomatitis             | 0.87023 | Bone formation decreased               | Musculoskeletal and connective tissue disorders |
| Musculoskeletal and connective tissue disorders | Bone formation decreased        | 0.87023 | Aural polyp                            | Ear and labyrinth disorders                     |
| Musculoskeletal and connective tissue disorders | Bone formation decreased        | 0.87023 | Pharyngeal polyp                       | Respiratory, thoracic and mediastinal disorders |
| Musculoskeletal and connective tissue disorders | Bone formation decreased        | 0.87023 | Fungal oesophagitis                    | Infections and infestations                     |
| Immune system disorders                         | Antiphospholipid syndrome       | 0.86999 | Injection site abscess                 | Infections and infestations                     |
| Infections and infestations                     | Injection site abscess          | 0.86999 | Meige's syndrome                       | Nervous system disorders                        |
| Infections and infestations                     | Oropharyngitis fungal           | 0.86995 | Disorder of globe                      | Eye disorders                                   |
| Reproductive system and breast disorders        | Breast discharge                | 0.86995 | Cervical discharge                     | Reproductive system and breast disorders        |

| Basis data for network                               |                                            |         |                                    |                                                |
|------------------------------------------------------|--------------------------------------------|---------|------------------------------------|------------------------------------------------|
| SOC1                                                 | AE1                                        | score   | AE2                                | SOC2                                           |
| Endocrine disorders                                  | Adrenocortical insufficiency acute         | 0.86992 | Fluid imbalance                    | Metabolism and nutrition disorders             |
| Nervous system disorders                             | Tongue paralysis                           | 0.86989 | Sperm count increased              | Investigations                                 |
| Endocrine disorders                                  | Hypothalamo-pituitary disorders            | 0.86982 | Adrenocortical insufficiency acute | Endocrine disorders                            |
| Investigations                                       | Spermatozoa progressive motility decreased | 0.86964 | Obsessive-compulsive disorder      | Psychiatric disorders                          |
| Congenital, familial and genetic disorders           | Tourette's disorder                        | 0.86963 | Retinal pigmentation               | Eye disorders                                  |
| Investigations                                       | Platelet aggregation increased             | 0.86952 | Retinal pigmentation               | Eye disorders                                  |
| Cardiac disorders                                    | Hypertrophic cardiomyopathy                | 0.86941 | Hypothalamo-pituitary disorders    | Endocrine disorders                            |
| Endocrine disorders                                  | Adrenal suppression                        | 0.86920 | Grey syndrome neonatal             | Cardiac disorders                              |
| Investigations                                       | Urine potassium decreased                  | 0.86904 | Urine chloride decreased           | Investigations                                 |
| Investigations                                       | Urine chloride decreased                   | 0.86904 | Urine sodium decreased             | Investigations                                 |
| General disorders and administration site conditions | Injection site abscess sterile             | 0.86895 | Corneal infection                  | Infections and infestations                    |
| Gastrointestinal disorders                           | Aptyalism                                  | 0.86888 | Choreoathetosis                    | Nervous system disorders                       |
| Nervous system disorders                             | Areflexia                                  | 0.86883 | Meige's syndrome                   | Nervous system disorders                       |
| Nervous system disorders                             | Areflexia                                  | 0.86883 | Antiphospholipid syndrome          | Immune system disorders                        |
| Endocrine disorders                                  | Hypopituitarism                            | 0.86881 | Panniculitis                       | Skin and subcutaneous tissue disorders         |
| Metabolism and nutrition disorders                   | Fluid imbalance                            | 0.86863 | Panniculitis                       | Skin and subcutaneous tissue disorders         |
| Skin and subcutaneous tissue disorders               | Skin striae                                | 0.86857 | Skin maceration                    | Skin and subcutaneous tissue disorders         |
| Gastrointestinal disorders                           | Gastroduodenal ulcer                       | 0.86856 | Tendon injury                      | Injury, poisoning and procedural complications |
| Gastrointestinal disorders                           | Gastroduodenal ulcer                       | 0.86856 | Posterior capsule opacification    | Eye disorders                                  |
| Investigations                                       | Blood chromium decreased                   | 0.86856 | Gastroduodenal ulcer               | Gastrointestinal disorders                     |

| Basis data for network                          |                                           |         |                                          |                                                                     |
|-------------------------------------------------|-------------------------------------------|---------|------------------------------------------|---------------------------------------------------------------------|
| SOC1                                            | AE1                                       | score   | AE2                                      | SOC2                                                                |
| Respiratory, thoracic and mediastinal disorders | Nasal mucosa atrophy                      | 0.86856 | Gastroduodenal ulcer                     | Gastrointestinal disorders                                          |
| Respiratory, thoracic and mediastinal disorders | Laryngeal obstruction                     | 0.86856 | Gastroduodenal ulcer                     | Gastrointestinal disorders                                          |
| Eye disorders                                   | Scleromalacia                             | 0.86856 | Gastroduodenal ulcer                     | Gastrointestinal disorders                                          |
| Gastrointestinal disorders                      | Gastroduodenal ulcer                      | 0.86856 | Chorioretinopathy                        | Eye disorders                                                       |
| Gastrointestinal disorders                      | Gastroduodenal ulcer                      | 0.86856 | Scoliosis                                | Musculoskeletal and connective tissue disorders                     |
| Investigations                                  | Urine calcium/creatinine ratio decreased  | 0.86854 | Gammopathy                               | Neoplasms benign, malignant and unspecified (incl cysts and polyps) |
| Investigations                                  | Urine calcium decreased                   | 0.86854 | Urine calcium/creatinine ratio decreased | Investigations                                                      |
| Investigations                                  | Urine calcium/creatinine ratio decreased  | 0.86854 | Rib fracture                             | Injury, poisoning and procedural complications                      |
| Investigations                                  | Blood 25-hydroxycholecalciferol increased | 0.86854 | Urine calcium/creatinine ratio decreased | Investigations                                                      |
| Skin and subcutaneous tissue disorders          | Fat atrophy                               | 0.86849 | Impaired healing                         | General disorders and administration site conditions                |
| Metabolism and nutrition disorders              | Fluid imbalance                           | 0.86842 | Cerebral venous thrombosis               | Nervous system disorders                                            |
| Congenital, familial and genetic disorders      | Limb reduction defect                     | 0.86827 | Platelet aggregation increased           | Investigations                                                      |
| Eye disorders                                   | Exophthalmos                              | 0.86825 | Hypopituitarism                          | Endocrine disorders                                                 |
| Endocrine disorders                             | Cushingoid                                | 0.86812 | Grey syndrome neonatal                   | Cardiac disorders                                                   |
| Congenital, familial and genetic disorders      | Tooth hypoplasia                          | 0.86810 | Anal inflammation                        | Gastrointestinal disorders                                          |
| Psychiatric disorders                           | Orgasm abnormal                           | 0.86790 | Pregnancy test false positive            | Investigations                                                      |
| Gastrointestinal disorders                      | Peptic ulcer perforation                  | 0.86774 | Spinal fracture                          | Injury, poisoning and procedural complications                      |
| Reproductive system and breast disorders        | Ejaculation failure                       | 0.86767 | Meige's syndrome                         | Nervous system disorders                                            |
| Reproductive system and breast disorders        | Ejaculation failure                       | 0.86767 | Antiphospholipid syndrome                | Immune system disorders                                             |
| Psychiatric disorders                           | Anorgasmia                                | 0.86762 | Hypomania                                | Psychiatric disorders                                               |

| Basis data for network                               |                                |         |                                |                                                                     |
|------------------------------------------------------|--------------------------------|---------|--------------------------------|---------------------------------------------------------------------|
| SOC1                                                 | AE1                            | score   | AE2                            | SOC2                                                                |
| General disorders and administration site conditions | Feeling hot and cold           | 0.86761 | Convulsion neonatal            | Nervous system disorders                                            |
| Musculoskeletal and connective tissue disorders      | Hypertonia neonatal            | 0.86761 | Pressure of speech             | Psychiatric disorders                                               |
| Psychiatric disorders                                | Pressure of speech             | 0.86761 | Convulsion neonatal            | Nervous system disorders                                            |
| Respiratory, thoracic and mediastinal disorders      | Cyanosis neonatal              | 0.86761 | Pressure of speech             | Psychiatric disorders                                               |
| General disorders and administration site conditions | Feeling hot and cold           | 0.86761 | Cyanosis neonatal              | Respiratory, thoracic and mediastinal disorders                     |
| General disorders and administration site conditions | Feeling hot and cold           | 0.86761 | Hypertonia neonatal            | Musculoskeletal and connective tissue disorders                     |
| Cardiac disorders                                    | Grey syndrome neonatal         | 0.86756 | Injection site abscess sterile | General disorders and administration site conditions                |
| Endocrine disorders                                  | Adrenal suppression            | 0.86749 | Alkalosis hypokalaemic         | Metabolism and nutrition disorders                                  |
| Skin and subcutaneous tissue disorders               | Skin atrophy                   | 0.86745 | Adrenal suppression            | Endocrine disorders                                                 |
| Nervous system disorders                             | Cerebral venous thrombosis     | 0.86742 | Large intestine perforation    | Gastrointestinal disorders                                          |
| Infections and infestations                          | Oropharyngeal candidiasis      | 0.86740 | Adrenal suppression            | Endocrine disorders                                                 |
| General disorders and administration site conditions | Injection site extravasation   | 0.86738 | Mucosal inflammation           | General disorders and administration site conditions                |
| Investigations                                       | Platelet aggregation increased | 0.86737 | Liver function test            | Investigations                                                      |
| Gastrointestinal disorders                           | Anal inflammation              | 0.86715 | Fontanelle bulging             | Nervous system disorders                                            |
| Metabolism and nutrition disorders                   | Glucose tolerance impaired     | 0.86714 | Cushingoid                     | Endocrine disorders                                                 |
| Endocrine disorders                                  | Cushing's syndrome             | 0.86711 | Adrenal suppression            | Endocrine disorders                                                 |
| Infections and infestations                          | Candida pneumonia              | 0.86711 | Autonomic neuropathy           | Nervous system disorders                                            |
| Investigations                                       | T-lymphocyte count decreased   | 0.86704 | Spinal claudication            | Nervous system disorders                                            |
| Congenital, familial and genetic disorders           | Cerebral atrophy congenital    | 0.86704 | T-lymphocyte count decreased   | Investigations                                                      |
| Investigations                                       | T-lymphocyte count decreased   | 0.86704 | B-cell lymphoma                | Neoplasms benign, malignant and unspecified (incl cysts and polyps) |

| Basis data for network                         |                                             |         |                              |                                                 |
|------------------------------------------------|---------------------------------------------|---------|------------------------------|-------------------------------------------------|
| SOC1                                           | AE1                                         | score   | AE2                          | SOC2                                            |
| Injury, poisoning and procedural complications | Stress fracture                             | 0.86704 | T-lymphocyte count decreased | Investigations                                  |
| Injury, poisoning and procedural complications | Delayed recovery from anaesthesia           | 0.86700 | Disinhibition                | Psychiatric disorders                           |
| Psychiatric disorders                          | Disinhibition                               | 0.86700 | Perseveration                | Psychiatric disorders                           |
| Psychiatric disorders                          | Disinhibition                               | 0.86700 | Communication disorder       | Psychiatric disorders                           |
| Psychiatric disorders                          | Disinhibition                               | 0.86700 | Aerophagia                   | Gastrointestinal disorders                      |
| Psychiatric disorders                          | Disinhibition                               | 0.86700 | Trance                       | Psychiatric disorders                           |
| Reproductive system and breast disorders       | Vulvovaginal ulceration                     | 0.86700 | Vaginal swelling             | Reproductive system and breast disorders        |
| Skin and subcutaneous tissue disorders         | Skin hypopigmentation                       | 0.86698 | Skin maceration              | Skin and subcutaneous tissue disorders          |
| Investigations                                 | Spermatozoa progressive motility decreased  | 0.86691 | Limb reduction defect        | Congenital, familial and genetic disorders      |
| Skin and subcutaneous tissue disorders         | Panniculitis                                | 0.86679 | Cataract subcapsular         | Eye disorders                                   |
| Nervous system disorders                       | Tongue paralysis                            | 0.86670 | Laryngeal disorder           | Respiratory, thoracic and mediastinal disorders |
| Endocrine disorders                            | Hypothalamo-pituitary disorders             | 0.86669 | Myocardial rupture           | Cardiac disorders                               |
| Endocrine disorders                            | Virilism                                    | 0.86667 | Cerebral venous thrombosis   | Nervous system disorders                        |
| Cardiac disorders                              | Myocardial rupture                          | 0.86666 | Cushingoid                   | Endocrine disorders                             |
| Nervous system disorders                       | Cerebellar artery occlusion                 | 0.86642 | Tongue injury                | Injury, poisoning and procedural complications  |
| Congenital, familial and genetic disorders     | Limb reduction defect                       | 0.86636 | Tongue paralysis             | Nervous system disorders                        |
| Cardiac disorders                              | Myocardial rupture                          | 0.86625 | Conjunctival bleb            | Eye disorders                                   |
| Investigations                                 | Blood thyroid stimulating hormone decreased | 0.86614 | Bladder stenosis             | Renal and urinary disorders                     |
| Investigations                                 | Blood thyroid stimulating hormone decreased | 0.86614 | Bile output decreased        | Investigations                                  |
| Nervous system disorders                       | Cerebral venous thrombosis                  | 0.86604 | Urine calcium increased      | Investigations                                  |

| Basis data for network                          |                               |         |                                        |                                                 |
|-------------------------------------------------|-------------------------------|---------|----------------------------------------|-------------------------------------------------|
| SOC1                                            | AE1                           | score   | AE2                                    | SOC2                                            |
| Reproductive system and breast disorders        | Ejaculation failure           | 0.86587 | Stereotypic movement disorder          | Psychiatric disorders                           |
| Gastrointestinal disorders                      | Intestinal dilatation         | 0.86586 | Injection site abscess                 | Infections and infestations                     |
| Endocrine disorders                             | Hypopituitarism               | 0.86578 | Large intestine perforation            | Gastrointestinal disorders                      |
| Investigations                                  | Bile output decreased         | 0.86578 | Piloerection                           | Skin and subcutaneous tissue disorders          |
| Skin and subcutaneous tissue disorders          | Piloerection                  | 0.86578 | Bladder stenosis                       | Renal and urinary disorders                     |
| Reproductive system and breast disorders        | Genital erythema              | 0.86577 | Vaginal swelling                       | Reproductive system and breast disorders        |
| Hepatobiliary disorders                         | Autoimmune hepatitis          | 0.86571 | Tooth hypoplasia                       | Congenital, familial and genetic disorders      |
| Reproductive system and breast disorders        | Breast engorgement            | 0.86569 | Sperm count increased                  | Investigations                                  |
| Musculoskeletal and connective tissue disorders | Growth retardation            | 0.86567 | Cushingoid                             | Endocrine disorders                             |
| Metabolism and nutrition disorders              | Glucose tolerance impaired    | 0.86567 | Spinal fracture                        | Injury, poisoning and procedural complications  |
| Endocrine disorders                             | Adrenal suppression           | 0.86564 | Skin depigmentation                    | Skin and subcutaneous tissue disorders          |
| Psychiatric disorders                           | Orgasm abnormal               | 0.86564 | Retrograde ejaculation                 | Reproductive system and breast disorders        |
| Eye disorders                                   | Exophthalmos                  | 0.86561 | Secondary adrenocortical insufficiency | Endocrine disorders                             |
| Psychiatric disorders                           | Stereotypic movement disorder | 0.86559 | Breast engorgement                     | Reproductive system and breast disorders        |
| Nervous system disorders                        | Areflexia                     | 0.86556 | Aspermia                               | Reproductive system and breast disorders        |
| Eye disorders                                   | Optic neuropathy              | 0.86549 | Scoliosis                              | Musculoskeletal and connective tissue disorders |
| Eye disorders                                   | Optic neuropathy              | 0.86549 | Scleromalacia                          | Eye disorders                                   |
| Respiratory, thoracic and mediastinal disorders | Nasal mucosa atrophy          | 0.86549 | Optic neuropathy                       | Eye disorders                                   |
| Respiratory, thoracic and mediastinal disorders | Laryngeal obstruction         | 0.86549 | Optic neuropathy                       | Eye disorders                                   |
| Injury, poisoning and procedural complications  | Tendon injury                 | 0.86549 | Optic neuropathy                       | Eye disorders                                   |



| Basis data for network                          |                                              |         |                                              |                                                 |
|-------------------------------------------------|----------------------------------------------|---------|----------------------------------------------|-------------------------------------------------|
| SOC1                                            | AE1                                          | score   | AE2                                          | SOC2                                            |
| Eye disorders                                   | Optic neuropathy                             | 0.86549 | Chorioretinopathy                            | Eye disorders                                   |
| Eye disorders                                   | Posterior capsule opacification              | 0.86549 | Optic neuropathy                             | Eye disorders                                   |
| Investigations                                  | Blood chromium decreased                     | 0.86549 | Optic neuropathy                             | Eye disorders                                   |
| Reproductive system and breast disorders        | Teratospermia                                | 0.86545 | Blood follicle stimulating hormone increased | Investigations                                  |
| Investigations                                  | Blood follicle stimulating hormone increased | 0.86545 | Calciophylaxis                               | Metabolism and nutrition disorders              |
| Respiratory, thoracic and mediastinal disorders | Foreign body aspiration                      | 0.86542 | Neurogenic bladder                           | Renal and urinary disorders                     |
| Investigations                                  | Urine calcium increased                      | 0.86515 | Hip fracture                                 | Injury, poisoning and procedural complications  |
| Musculoskeletal and connective tissue disorders | Myopathy steroid                             | 0.86514 | Adrenal suppression                          | Endocrine disorders                             |
| Gastrointestinal disorders                      | Dental discomfort                            | 0.86494 | Creatinine urine decreased                   | Investigations                                  |
| Infections and infestations                     | Eczema infected                              | 0.86494 | Dental discomfort                            | Gastrointestinal disorders                      |
| Gastrointestinal disorders                      | Dental discomfort                            | 0.86494 | Herpetic stomatitis                          | Infections and infestations                     |
| Gastrointestinal disorders                      | Dental discomfort                            | 0.86494 | Pharyngeal candidiasis                       | Infections and infestations                     |
| Infections and infestations                     | Fungal oesophagitis                          | 0.86494 | Dental discomfort                            | Gastrointestinal disorders                      |
| Infections and infestations                     | Myringitis                                   | 0.86494 | Dental discomfort                            | Gastrointestinal disorders                      |
| Ear and labyrinth disorders                     | Aural polyp                                  | 0.86494 | Dental discomfort                            | Gastrointestinal disorders                      |
| Gastrointestinal disorders                      | Dental discomfort                            | 0.86494 | Pharyngeal polyp                             | Respiratory, thoracic and mediastinal disorders |
| Musculoskeletal and connective tissue disorders | Muscle atrophy                               | 0.86493 | Fat atrophy                                  | Skin and subcutaneous tissue disorders          |
| Nervous system disorders                        | Meige's syndrome                             | 0.86473 | Cardiac output decreased                     | Investigations                                  |
| Immune system disorders                         | Antiphospholipid syndrome                    | 0.86473 | Cardiac output decreased                     | Investigations                                  |
| Respiratory, thoracic and mediastinal disorders | Asphyxia                                     | 0.86468 | Tongue paralysis                             | Nervous system disorders                        |

| Basis data for network                          |                                              |         |                                      |                                                 |
|-------------------------------------------------|----------------------------------------------|---------|--------------------------------------|-------------------------------------------------|
| SOC1                                            | AE1                                          | score   | AE2                                  | SOC2                                            |
| Metabolism and nutrition disorders              | Glucose tolerance impaired                   | 0.86466 | Hypercoagulation                     | Blood and lymphatic system disorders            |
| Endocrine disorders                             | Secondary adrenocortical insufficiency       | 0.86466 | Growth retardation                   | Musculoskeletal and connective tissue disorders |
| Investigations                                  | Blood follicle stimulating hormone increased | 0.86465 | Gastrointestinal injury              | Injury, poisoning and procedural complications  |
| Congenital, familial and genetic disorders      | Microphthalmos                               | 0.86458 | Retinoic acid syndrome               | Respiratory, thoracic and mediastinal disorders |
| Congenital, familial and genetic disorders      | Microphthalmos                               | 0.86458 | Optic nerve hypoplasia               | Congenital, familial and genetic disorders      |
| Congenital, familial and genetic disorders      | Microphthalmos                               | 0.86458 | Thymus hypoplasia                    | Congenital, familial and genetic disorders      |
| Congenital, familial and genetic disorders      | Microphthalmos                               | 0.86458 | Congenital great vessel anomaly      | Congenital, familial and genetic disorders      |
| Congenital, familial and genetic disorders      | Microphthalmos                               | 0.86458 | Hypertelorism of orbit               | Congenital, familial and genetic disorders      |
| Congenital, familial and genetic disorders      | Microphthalmos                               | 0.86458 | Lower respiratory tract inflammation | Respiratory, thoracic and mediastinal disorders |
| Congenital, familial and genetic disorders      | Microphthalmos                               | 0.86458 | Scrotal ulcer                        | Reproductive system and breast disorders        |
| Congenital, familial and genetic disorders      | Microphthalmos                               | 0.86458 | White blood cells urine              | Investigations                                  |
| Congenital, familial and genetic disorders      | Microphthalmos                               | 0.86458 | Acne fulminans                       | Skin and subcutaneous tissue disorders          |
| Musculoskeletal and connective tissue disorders | Tendon calcification                         | 0.86458 | Microphthalmos                       | Congenital, familial and genetic disorders      |
| Congenital, familial and genetic disorders      | Microphthalmos                               | 0.86458 | Asthma exercise induced              | Respiratory, thoracic and mediastinal disorders |
| Metabolism and nutrition disorders              | Glucose tolerance impaired                   | 0.86455 | Laryngeal obstruction                | Respiratory, thoracic and mediastinal disorders |
| Metabolism and nutrition disorders              | Glucose tolerance impaired                   | 0.86455 | Posterior capsule opacification      | Eye disorders                                   |
| Metabolism and nutrition disorders              | Glucose tolerance impaired                   | 0.86455 | Tendon injury                        | Injury, poisoning and procedural complications  |
| Metabolism and nutrition disorders              | Glucose tolerance impaired                   | 0.86455 | Blood chromium decreased             | Investigations                                  |
| Respiratory, thoracic and mediastinal disorders | Nasal mucosa atrophy                         | 0.86455 | Glucose tolerance impaired           | Metabolism and nutrition disorders              |
| Metabolism and nutrition disorders              | Glucose tolerance impaired                   | 0.86455 | Scleromalacia                        | Eye disorders                                   |

| Basis data for network                               |                                            |         |                                      |                                                 |
|------------------------------------------------------|--------------------------------------------|---------|--------------------------------------|-------------------------------------------------|
| SOC1                                                 | AE1                                        | score   | AE2                                  | SOC2                                            |
| Metabolism and nutrition disorders                   | Glucose tolerance impaired                 | 0.86455 | Scoliosis                            | Musculoskeletal and connective tissue disorders |
| Eye disorders                                        | Chorioretinopathy                          | 0.86455 | Glucose tolerance impaired           | Metabolism and nutrition disorders              |
| Nervous system disorders                             | Retrograde amnesia                         | 0.86451 | Pupil fixed                          | Eye disorders                                   |
| Skin and subcutaneous tissue disorders               | Leukoderma                                 | 0.86446 | Spinal compression fracture          | Injury, poisoning and procedural complications  |
| Skin and subcutaneous tissue disorders               | Skin depigmentation                        | 0.86432 | Grey syndrome neonatal               | Cardiac disorders                               |
| Congenital, familial and genetic disorders           | Colour blindness                           | 0.86426 | Muscle enzyme increased              | Investigations                                  |
| Skin and subcutaneous tissue disorders               | Leukoderma                                 | 0.86423 | Cerebral venous thrombosis           | Nervous system disorders                        |
| Investigations                                       | Spermatozoa progressive motility decreased | 0.86413 | Liver function test                  | Investigations                                  |
| Endocrine disorders                                  | Adrenocortical insufficiency acute         | 0.86408 | Growth retardation                   | Musculoskeletal and connective tissue disorders |
| Investigations                                       | Urinary nitrogen increased                 | 0.86406 | Episcleritis                         | Eye disorders                                   |
| Congenital, familial and genetic disorders           | Tourette's disorder                        | 0.86382 | Pregnancy test false positive        | Investigations                                  |
| Investigations                                       | Cortisol free urine decreased              | 0.86378 | Hypercorticism                       | Endocrine disorders                             |
| Endocrine disorders                                  | Cushingoid                                 | 0.86374 | Neuropathic arthropathy              | Musculoskeletal and connective tissue disorders |
| Nervous system disorders                             | Areflexia                                  | 0.86361 | Blood antidiuretic hormone increased | Investigations                                  |
| Endocrine disorders                                  | Hypothalamo-pituitary disorders            | 0.86356 | Spinal compression fracture          | Injury, poisoning and procedural complications  |
| Injury, poisoning and procedural complications       | Spinal compression fracture                | 0.86354 | Adrenal suppression                  | Endocrine disorders                             |
| Nervous system disorders                             | Trigeminal nerve disorder                  | 0.86343 | Nasal candidiasis                    | Infections and infestations                     |
| General disorders and administration site conditions | Sensation of pressure                      | 0.86342 | Mediastinal cyst                     | Respiratory, thoracic and mediastinal disorders |
| General disorders and administration site conditions | Sensation of pressure                      | 0.86342 | Vascular calcification               | Vascular disorders                              |
| Endocrine disorders                                  | Hypothalamo-pituitary disorders            | 0.86342 | Fat atrophy                          | Skin and subcutaneous tissue disorders          |

| Basis data for network                                              |                                     |         |                                          |                                                      |
|---------------------------------------------------------------------|-------------------------------------|---------|------------------------------------------|------------------------------------------------------|
| SOC1                                                                | AE1                                 | score   | AE2                                      | SOC2                                                 |
| Infections and infestations                                         | Infusion site infection             | 0.86329 | Intraocular pressure test abnormal       | Investigations                                       |
| Infections and infestations                                         | Infusion site infection             | 0.86329 | Scleral disorder                         | Eye disorders                                        |
| Nervous system disorders                                            | Areflexia                           | 0.86327 | Dyskinesia oesophageal                   | Gastrointestinal disorders                           |
| Metabolism and nutrition disorders                                  | Alkalosis hypokalaemic              | 0.86322 | Leukoderma                               | Skin and subcutaneous tissue disorders               |
| Vascular disorders                                                  | Aortic aneurysm                     | 0.86321 | Panniculitis                             | Skin and subcutaneous tissue disorders               |
| Endocrine disorders                                                 | Cushingoid                          | 0.86318 | Impaired healing                         | General disorders and administration site conditions |
| General disorders and administration site conditions                | Mucosal inflammation                | 0.86314 | Calciophylaxis                           | Metabolism and nutrition disorders                   |
| Reproductive system and breast disorders                            | Teratospermia                       | 0.86314 | Mucosal inflammation                     | General disorders and administration site conditions |
| Reproductive system and breast disorders                            | Enlarged clitoris                   | 0.86307 | Testicular failure                       | Endocrine disorders                                  |
| Investigations                                                      | Protein total increased             | 0.86305 | Haptoglobin increased                    | Investigations                                       |
| Investigations                                                      | Protein total increased             | 0.86305 | Supernumerary nipple                     | Congenital, familial and genetic disorders           |
| Neoplasms benign, malignant and unspecified (incl cysts and polyps) | Lymphoma cutis                      | 0.86305 | Protein total increased                  | Investigations                                       |
| Investigations                                                      | Protein total increased             | 0.86305 | Haptoglobin decreased                    | Investigations                                       |
| Investigations                                                      | Protein total increased             | 0.86305 | Senile ankylosing vertebral hyperostosis | Musculoskeletal and connective tissue disorders      |
| Eye disorders                                                       | Madarosis                           | 0.86305 | Protein total increased                  | Investigations                                       |
| Investigations                                                      | Protein total increased             | 0.86305 | Blood iron increased                     | Investigations                                       |
| Investigations                                                      | Protein total increased             | 0.86305 | Lichenification                          | Skin and subcutaneous tissue disorders               |
| Investigations                                                      | Protein total increased             | 0.86305 | Cryptorchism                             | Congenital, familial and genetic disorders           |
| Musculoskeletal and connective tissue disorders                     | Intervertebral disc space narrowing | 0.86305 | Protein total increased                  | Investigations                                       |
| Investigations                                                      | Blood growth hormone increased      | 0.86300 | Breast engorgement                       | Reproductive system and breast disorders             |

| Basis data for network                               |                                 |         |                                    |                                                      |
|------------------------------------------------------|---------------------------------|---------|------------------------------------|------------------------------------------------------|
| SOC1                                                 | AE1                             | score   | AE2                                | SOC2                                                 |
| Eye disorders                                        | Exophthalmos                    | 0.86297 | Cataract subcapsular               | Eye disorders                                        |
| Vascular disorders                                   | Aortic aneurysm                 | 0.86285 | Adrenocortical insufficiency acute | Endocrine disorders                                  |
| Reproductive system and breast disorders             | Lactation disorder              | 0.86283 | CSF protein abnormal               | Investigations                                       |
| Metabolism and nutrition disorders                   | Body fat disorder               | 0.86283 | Panniculitis                       | Skin and subcutaneous tissue disorders               |
| Skin and subcutaneous tissue disorders               | Skin depigmentation             | 0.86281 | Cataract subcapsular               | Eye disorders                                        |
| Pregnancy, puerperium and perinatal conditions       | Foetal growth retardation       | 0.86281 | Oligohydramnios                    | Pregnancy, puerperium and perinatal conditions       |
| Infections and infestations                          | Oropharyngeal candidiasis       | 0.86274 | General symptom                    | General disorders and administration site conditions |
| General disorders and administration site conditions | Injection site abscess sterile  | 0.86257 | Chorioretinopathy                  | Eye disorders                                        |
| General disorders and administration site conditions | Injection site abscess sterile  | 0.86257 | Blood chromium decreased           | Investigations                                       |
| Eye disorders                                        | Posterior capsule opacification | 0.86257 | Injection site abscess sterile     | General disorders and administration site conditions |
| Respiratory, thoracic and mediastinal disorders      | Laryngeal obstruction           | 0.86257 | Injection site abscess sterile     | General disorders and administration site conditions |
| General disorders and administration site conditions | Injection site abscess sterile  | 0.86257 | Nasal mucosa atrophy               | Respiratory, thoracic and mediastinal disorders      |
| Injury, poisoning and procedural complications       | Tendon injury                   | 0.86257 | Injection site abscess sterile     | General disorders and administration site conditions |
| General disorders and administration site conditions | Injection site abscess sterile  | 0.86257 | Scleromalacia                      | Eye disorders                                        |
| General disorders and administration site conditions | Injection site abscess sterile  | 0.86257 | Scoliosis                          | Musculoskeletal and connective tissue disorders      |
| Congenital, familial and genetic disorders           | Pulmonary hypoplasia            | 0.86253 | Oligohydramnios                    | Pregnancy, puerperium and perinatal conditions       |
| Vascular disorders                                   | Neonatal hypotension            | 0.86253 | Oligohydramnios                    | Pregnancy, puerperium and perinatal conditions       |
| Endocrine disorders                                  | Hypothalamo-pituitary disorders | 0.86233 | Myopathy steroid                   | Musculoskeletal and connective tissue disorders      |
| Skin and subcutaneous tissue disorders               | Skin hypopigmentation           | 0.86231 | Heat rash                          | Skin and subcutaneous tissue disorders               |
| Injury, poisoning and procedural complications       | Gastrointestinal injury         | 0.86228 | Mucosal inflammation               | General disorders and administration site conditions |

| Basis data for network                          |                                    |         |                                           |                                                      |
|-------------------------------------------------|------------------------------------|---------|-------------------------------------------|------------------------------------------------------|
| SOC1                                            | AE1                                | score   | AE2                                       | SOC2                                                 |
| Musculoskeletal and connective tissue disorders | Neuropathic arthropathy            | 0.86226 | Oropharyngitis fungal                     | Infections and infestations                          |
| Psychiatric disorders                           | Hallucination, olfactory           | 0.86220 | Blood creatine phosphokinase MB increased | Investigations                                       |
| Psychiatric disorders                           | Hallucination, olfactory           | 0.86220 | Abasia                                    | General disorders and administration site conditions |
| Musculoskeletal and connective tissue disorders | Coccydynia                         | 0.86220 | Hallucination, olfactory                  | Psychiatric disorders                                |
| Psychiatric disorders                           | Hallucination, olfactory           | 0.86220 | Intention tremor                          | Nervous system disorders                             |
| Psychiatric disorders                           | Hallucination, tactile             | 0.86220 | Hallucination, olfactory                  | Psychiatric disorders                                |
| Investigations                                  | Glycosylated haemoglobin increased | 0.86220 | Hallucination, olfactory                  | Psychiatric disorders                                |
| Musculoskeletal and connective tissue disorders | Buttock pain                       | 0.86220 | Hallucination, olfactory                  | Psychiatric disorders                                |
| Psychiatric disorders                           | Blunted affect                     | 0.86220 | Hallucination, olfactory                  | Psychiatric disorders                                |
| Psychiatric disorders                           | Suspiciousness                     | 0.86220 | Hallucination, olfactory                  | Psychiatric disorders                                |
| Psychiatric disorders                           | Hallucination, olfactory           | 0.86220 | Mendelson's syndrome                      | Respiratory, thoracic and mediastinal disorders      |
| Psychiatric disorders                           | Hallucination, olfactory           | 0.86220 | Glycosylated haemoglobin decreased        | Investigations                                       |
| Nervous system disorders                        | Parkinsonian rest tremor           | 0.86220 | Hallucination, olfactory                  | Psychiatric disorders                                |
| Psychiatric disorders                           | Hallucination, olfactory           | 0.86220 | Flat affect                               | Psychiatric disorders                                |
| Injury, poisoning and procedural complications  | Periorbital haematoma              | 0.86220 | Hallucination, olfactory                  | Psychiatric disorders                                |
| Psychiatric disorders                           | Hallucination, olfactory           | 0.86220 | Diet refusal                              | Metabolism and nutrition disorders                   |
| Nervous system disorders                        | Mastication disorder               | 0.86220 | Hallucination, olfactory                  | Psychiatric disorders                                |
| Psychiatric disorders                           | Hallucination, olfactory           | 0.86220 | Dizziness exertional                      | Nervous system disorders                             |
| Reproductive system and breast disorders        | Spontaneous penile erection        | 0.86220 | Hallucination, olfactory                  | Psychiatric disorders                                |
| Psychiatric disorders                           | Hallucination, olfactory           | 0.86220 | Scratch                                   | Injury, poisoning and procedural complications       |

| Basis data for network                          |                                            |         |                             |                                                      |
|-------------------------------------------------|--------------------------------------------|---------|-----------------------------|------------------------------------------------------|
| SOC1                                            | AE1                                        | score   | AE2                         | SOC2                                                 |
| Injury, poisoning and procedural complications  | Self mutilation                            | 0.86220 | Hallucination, olfactory    | Psychiatric disorders                                |
| Investigations                                  | Spermatozoa progressive motility decreased | 0.86218 | Retrograde ejaculation      | Reproductive system and breast disorders             |
| Gastrointestinal disorders                      | Umbilical hernia                           | 0.86202 | Poor sucking reflex         | Nervous system disorders                             |
| Gastrointestinal disorders                      | Umbilical hernia                           | 0.86202 | Meningomyelocele            | Congenital, familial and genetic disorders           |
| Respiratory, thoracic and mediastinal disorders | Acute respiratory failure                  | 0.86200 | Tongue paralysis            | Nervous system disorders                             |
| Investigations                                  | Crystal urine                              | 0.86195 | Akinaesthesia               | Nervous system disorders                             |
| Eye disorders                                   | Retinal pigmentation                       | 0.86193 | Breast engorgement          | Reproductive system and breast disorders             |
| Endocrine disorders                             | Hypercorticism                             | 0.86188 | Hypertrophic cardiomyopathy | Cardiac disorders                                    |
| Investigations                                  | Platelet aggregation increased             | 0.86186 | Laryngeal disorder          | Respiratory, thoracic and mediastinal disorders      |
| Injury, poisoning and procedural complications  | Hip fracture                               | 0.86184 | Leukoderma                  | Skin and subcutaneous tissue disorders               |
| Respiratory, thoracic and mediastinal disorders | Aspiration                                 | 0.86182 | Acute respiratory failure   | Respiratory, thoracic and mediastinal disorders      |
| Gastrointestinal disorders                      | Intestinal dilatation                      | 0.86181 | Ejaculation failure         | Reproductive system and breast disorders             |
| Cardiac disorders                               | Cardiac tamponade                          | 0.86180 | Ventricular hypokinesia     | Cardiac disorders                                    |
| Nervous system disorders                        | Spinocerebellar disorder                   | 0.86167 | Hepatobiliary disease       | Hepatobiliary disorders                              |
| Gastrointestinal disorders                      | Odynophagia                                | 0.86129 | Oropharyngeal candidiasis   | Infections and infestations                          |
| Investigations                                  | Urine glucose false positive               | 0.86120 | Coombs direct test positive | Investigations                                       |
| Eye disorders                                   | Cataract subcapsular                       | 0.86119 | Impaired healing            | General disorders and administration site conditions |
| Blood and lymphatic system disorders            | Hypercoagulation                           | 0.86113 | Cataract subcapsular        | Eye disorders                                        |
| Investigations                                  | Liver function test                        | 0.86104 | Tourette's disorder         | Congenital, familial and genetic disorders           |
| Investigations                                  | Cardiac output decreased                   | 0.86097 | Intestinal dilatation       | Gastrointestinal disorders                           |

| Basis data for network                               |                                 |         |                                           |                                                |
|------------------------------------------------------|---------------------------------|---------|-------------------------------------------|------------------------------------------------|
| SOC1                                                 | AE1                             | score   | AE2                                       | SOC2                                           |
| General disorders and administration site conditions | Injection site nodule           | 0.86080 | Injection site abscess                    | Infections and infestations                    |
| Skin and subcutaneous tissue disorders               | Skin depigmentation             | 0.86074 | Adrenocortical insufficiency acute        | Endocrine disorders                            |
| Metabolism and nutrition disorders                   | Hypercatabolism                 | 0.86059 | Hypercorticism                            | Endocrine disorders                            |
| Endocrine disorders                                  | Hypothalamo-pituitary disorders | 0.86059 | Alkalosis hypokalaemic                    | Metabolism and nutrition disorders             |
| Endocrine disorders                                  | Hypopituitarism                 | 0.86056 | Hip fracture                              | Injury, poisoning and procedural complications |
| Endocrine disorders                                  | Cushingoid                      | 0.86049 | Skin atrophy                              | Skin and subcutaneous tissue disorders         |
| Congenital, familial and genetic disorders           | Tourette's disorder             | 0.86042 | Limb reduction defect                     | Congenital, familial and genetic disorders     |
| Gastrointestinal disorders                           | Small intestinal perforation    | 0.86041 | Spermatozoa progressive motility abnormal | Investigations                                 |
| Gastrointestinal disorders                           | Large intestine perforation     | 0.86026 | Urine calcium increased                   | Investigations                                 |
| Reproductive system and breast disorders             | Vaginal odour                   | 0.86022 | Vulval oedema                             | Reproductive system and breast disorders       |
| Musculoskeletal and connective tissue disorders      | Myopathy steroid                | 0.85979 | Leukoderma                                | Skin and subcutaneous tissue disorders         |
| Endocrine disorders                                  | Acromegaly                      | 0.85968 | Cleft lip and palate                      | Congenital, familial and genetic disorders     |
| Congenital, familial and genetic disorders           | Cleft lip and palate            | 0.85968 | Blood antidiuretic hormone decreased      | Investigations                                 |
| Musculoskeletal and connective tissue disorders      | Purple glove syndrome           | 0.85968 | Cleft lip and palate                      | Congenital, familial and genetic disorders     |
| Nervous system disorders                             | Cerebral venous thrombosis      | 0.85967 | Hypopituitarism                           | Endocrine disorders                            |
| Reproductive system and breast disorders             | Breast atrophy                  | 0.85966 | Ureteric obstruction                      | Renal and urinary disorders                    |
| Reproductive system and breast disorders             | Breast atrophy                  | 0.85966 | Scrotal haematoma                         | Injury, poisoning and procedural complications |
| Reproductive system and breast disorders             | Ovarian atrophy                 | 0.85966 | Breast atrophy                            | Reproductive system and breast disorders       |
| Reproductive system and breast disorders             | Breast atrophy                  | 0.85966 | Scrotal infection                         | Infections and infestations                    |
| Skin and subcutaneous tissue disorders               | Leukoderma                      | 0.85958 | Hypercoagulation                          | Blood and lymphatic system disorders           |



| Basis data for network                     |                            |         |                                            |                                            |
|--------------------------------------------|----------------------------|---------|--------------------------------------------|--------------------------------------------|
| SOC1                                       | AE1                        | score   | AE2                                        | SOC2                                       |
| Metabolism and nutrition disorders         | Catabolic state            | 0.85950 | Glucose tolerance impaired                 | Metabolism and nutrition disorders         |
| Nervous system disorders                   | Facial spasm               | 0.85946 | Spermatozoa progressive motility decreased | Investigations                             |
| Nervous system disorders                   | Neurodegenerative disorder | 0.85926 | Carnitine deficiency                       | Metabolism and nutrition disorders         |
| Metabolism and nutrition disorders         | Carnitine deficiency       | 0.85926 | Androgens increased                        | Investigations                             |
| Metabolism and nutrition disorders         | Carnitine deficiency       | 0.85926 | Hyperhomocysteinaemia                      | Metabolism and nutrition disorders         |
| Gastrointestinal disorders                 | Pancreatic necrosis        | 0.85926 | Carnitine deficiency                       | Metabolism and nutrition disorders         |
| Investigations                             | Bleeding time abnormal     | 0.85926 | Acquired afibrinogenaemia                  | Blood and lymphatic system disorders       |
| Psychiatric disorders                      | Pseudodementia             | 0.85926 | Androgens increased                        | Investigations                             |
| Psychiatric disorders                      | Abulia                     | 0.85926 | Pseudodementia                             | Psychiatric disorders                      |
| Congenital, familial and genetic disorders | Talipes                    | 0.85926 | Carnitine deficiency                       | Metabolism and nutrition disorders         |
| Psychiatric disorders                      | Pseudodementia             | 0.85926 | Neurodegenerative disorder                 | Nervous system disorders                   |
| Blood and lymphatic system disorders       | Acquired afibrinogenaemia  | 0.85926 | Pseudodementia                             | Psychiatric disorders                      |
| Investigations                             | Androgens increased        | 0.85926 | Bleeding time abnormal                     | Investigations                             |
| Metabolism and nutrition disorders         | Hyperhomocysteinaemia      | 0.85926 | Bleeding time abnormal                     | Investigations                             |
| Investigations                             | Bleeding time abnormal     | 0.85926 | Abulia                                     | Psychiatric disorders                      |
| Blood and lymphatic system disorders       | Acquired afibrinogenaemia  | 0.85926 | Carnitine deficiency                       | Metabolism and nutrition disorders         |
| Psychiatric disorders                      | Pseudodementia             | 0.85926 | Talipes                                    | Congenital, familial and genetic disorders |
| Investigations                             | Bleeding time abnormal     | 0.85926 | Clinodactyly                               | Congenital, familial and genetic disorders |
| Investigations                             | Bleeding time abnormal     | 0.85926 | Talipes                                    | Congenital, familial and genetic disorders |
| Metabolism and nutrition disorders         | Carnitine deficiency       | 0.85926 | Clinodactyly                               | Congenital, familial and genetic disorders |

| Basis data for network                                              |                         |         |                            |                                                      |
|---------------------------------------------------------------------|-------------------------|---------|----------------------------|------------------------------------------------------|
| SOC1                                                                | AE1                     | score   | AE2                        | SOC2                                                 |
| Psychiatric disorders                                               | Pseudodementia          | 0.85926 | Clinodactyly               | Congenital, familial and genetic disorders           |
| Psychiatric disorders                                               | Pseudodementia          | 0.85926 | Pancreatic necrosis        | Gastrointestinal disorders                           |
| General disorders and administration site conditions                | Pseudocyst              | 0.85926 | Carnitine deficiency       | Metabolism and nutrition disorders                   |
| Psychiatric disorders                                               | Pseudodementia          | 0.85926 | Pseudocyst                 | General disorders and administration site conditions |
| Congenital, familial and genetic disorders                          | Cerebral palsy          | 0.85926 | Pseudodementia             | Psychiatric disorders                                |
| Metabolism and nutrition disorders                                  | Carnitine deficiency    | 0.85926 | Cerebral palsy             | Congenital, familial and genetic disorders           |
| Psychiatric disorders                                               | Pseudodementia          | 0.85926 | Hyperhomocysteinaemia      | Metabolism and nutrition disorders                   |
| Investigations                                                      | Bleeding time abnormal  | 0.85926 | Neurodegenerative disorder | Nervous system disorders                             |
| Psychiatric disorders                                               | Abulia                  | 0.85926 | Carnitine deficiency       | Metabolism and nutrition disorders                   |
| Investigations                                                      | Bleeding time abnormal  | 0.85926 | Pseudocyst                 | General disorders and administration site conditions |
| Investigations                                                      | Bleeding time abnormal  | 0.85926 | Cerebral palsy             | Congenital, familial and genetic disorders           |
| Gastrointestinal disorders                                          | Pancreatic necrosis     | 0.85926 | Bleeding time abnormal     | Investigations                                       |
| Nervous system disorders                                            | Akathisia               | 0.85919 | Choreoathetosis            | Nervous system disorders                             |
| Psychiatric disorders                                               | Disinhibition           | 0.85916 | Tearfulness                | Psychiatric disorders                                |
| General disorders and administration site conditions                | Loss of control of legs | 0.85916 | Disinhibition              | Psychiatric disorders                                |
| Endocrine disorders                                                 | Hypopituitarism         | 0.85914 | Glucose tolerance impaired | Metabolism and nutrition disorders                   |
| Hepatobiliary disorders                                             | Biliary dilatation      | 0.85914 | Injection site rash        | General disorders and administration site conditions |
| Neoplasms benign, malignant and unspecified (incl cysts and polyps) | Biliary neoplasm        | 0.85914 | Injection site rash        | General disorders and administration site conditions |
| Endocrine disorders                                                 | Pituitary haemorrhage   | 0.85914 | Injection site rash        | General disorders and administration site conditions |
| General disorders and administration site conditions                | Injection site rash     | 0.85914 | Renal abscess              | Infections and infestations                          |

| Basis data for network                               |                                 |         |                                      |                                                                     |
|------------------------------------------------------|---------------------------------|---------|--------------------------------------|---------------------------------------------------------------------|
| SOC1                                                 | AE1                             | score   | AE2                                  | SOC2                                                                |
| General disorders and administration site conditions | Injection site rash             | 0.85914 | Microlithiasis                       | General disorders and administration site conditions                |
| General disorders and administration site conditions | Injection site rash             | 0.85914 | Bladder papilloma                    | Neoplasms benign, malignant and unspecified (incl cysts and polyps) |
| Reproductive system and breast disorders             | Aspermia                        | 0.85903 | Cardiac output decreased             | Investigations                                                      |
| Psychiatric disorders                                | Anorexia nervosa                | 0.85901 | Scleral thinning                     | Eye disorders                                                       |
| Eye disorders                                        | Scleral thinning                | 0.85901 | Nocardiosis                          | Infections and infestations                                         |
| Infections and infestations                          | Amoebiasis                      | 0.85901 | Scleral thinning                     | Eye disorders                                                       |
| Gastrointestinal disorders                           | Peptic ulcer perforation        | 0.85901 | Injection site abscess sterile       | General disorders and administration site conditions                |
| Eye disorders                                        | Lens disorder                   | 0.85893 | Lipids increased                     | Investigations                                                      |
| Musculoskeletal and connective tissue disorders      | Growth retardation              | 0.85888 | Exophthalmos                         | Eye disorders                                                       |
| Gastrointestinal disorders                           | Tongue spasm                    | 0.85886 | Carotid artery disease               | Nervous system disorders                                            |
| Investigations                                       | Electromyogram abnormal         | 0.85884 | Coprolalia                           | Psychiatric disorders                                               |
| Nervous system disorders                             | Tongue paralysis                | 0.85878 | Aspiration                           | Respiratory, thoracic and mediastinal disorders                     |
| Reproductive system and breast disorders             | Aspermia                        | 0.85873 | Injection site abscess               | Infections and infestations                                         |
| Gastrointestinal disorders                           | Gastroduodenal ulcer            | 0.85865 | Catabolic state                      | Metabolism and nutrition disorders                                  |
| Reproductive system and breast disorders             | Aspermia                        | 0.85860 | Ejaculation failure                  | Reproductive system and breast disorders                            |
| Endocrine disorders                                  | Hypothalamo-pituitary disorders | 0.85842 | Nitrogen balance negative            | Investigations                                                      |
| Skin and subcutaneous tissue disorders               | Chloasma                        | 0.85838 | Contact lens intolerance             | Eye disorders                                                       |
| Infections and infestations                          | Injection site abscess          | 0.85836 | Blood antidiuretic hormone increased | Investigations                                                      |
| Skin and subcutaneous tissue disorders               | Panniculitis                    | 0.85827 | Large intestine perforation          | Gastrointestinal disorders                                          |
| Skin and subcutaneous tissue disorders               | Panniculitis                    | 0.85826 | Adrenal suppression                  | Endocrine disorders                                                 |

| Basis data for network                          |                                        |         |                                      |                                                      |
|-------------------------------------------------|----------------------------------------|---------|--------------------------------------|------------------------------------------------------|
| SOC1                                            | AE1                                    | score   | AE2                                  | SOC2                                                 |
| Gastrointestinal disorders                      | Dyskinesia oesophageal                 | 0.85821 | Injection site abscess               | Infections and infestations                          |
| Reproductive system and breast disorders        | Ejaculation failure                    | 0.85819 | Blood antidiuretic hormone increased | Investigations                                       |
| Investigations                                  | Sperm count increased                  | 0.85819 | Tourette's disorder                  | Congenital, familial and genetic disorders           |
| Endocrine disorders                             | Cushingoid                             | 0.85816 | Hypothalamo-pituitary disorders      | Endocrine disorders                                  |
| Infections and infestations                     | Corneal infection                      | 0.85813 | Glucose tolerance impaired           | Metabolism and nutrition disorders                   |
| Investigations                                  | Liver function test                    | 0.85809 | Orgasm abnormal                      | Psychiatric disorders                                |
| Eye disorders                                   | Cataract subcapsular                   | 0.85794 | Virilism                             | Endocrine disorders                                  |
| Psychiatric disorders                           | Coprolalia                             | 0.85786 | Pulmonary tuberculosis               | Infections and infestations                          |
| Psychiatric disorders                           | Coprolalia                             | 0.85786 | Lung abscess                         | Infections and infestations                          |
| Psychiatric disorders                           | Coprolalia                             | 0.85786 | Haemophilus sepsis                   | Infections and infestations                          |
| Endocrine disorders                             | Secondary adrenocortical insufficiency | 0.85782 | Neuropathic arthropathy              | Musculoskeletal and connective tissue disorders      |
| Investigations                                  | Acoustic stimulation tests abnormal    | 0.85775 | Inappropriate affect                 | Psychiatric disorders                                |
| Musculoskeletal and connective tissue disorders | Growth retardation                     | 0.85771 | Injection site abscess sterile       | General disorders and administration site conditions |
| Gastrointestinal disorders                      | Peptic ulcer perforation               | 0.85739 | Cataract subcapsular                 | Eye disorders                                        |
| Investigations                                  | Skin test positive                     | 0.85721 | Ovarian hyperstimulation syndrome    | Reproductive system and breast disorders             |
| Investigations                                  | Platelet aggregation increased         | 0.85712 | Aspiration                           | Respiratory, thoracic and mediastinal disorders      |
| Nervous system disorders                        | Cerebellar artery thrombosis           | 0.85706 | Blood aldosterone decreased          | Investigations                                       |
| Skin and subcutaneous tissue disorders          | Panniculitis                           | 0.85703 | Hypertrophic cardiomyopathy          | Cardiac disorders                                    |
| Metabolism and nutrition disorders              | Body fat disorder                      | 0.85687 | Fat atrophy                          | Skin and subcutaneous tissue disorders               |
| Blood and lymphatic system disorders            | Hypercoagulation                       | 0.85665 | Fluid imbalance                      | Metabolism and nutrition disorders                   |

| Basis data for network                                              |                                               |         |                                               |                                                      |
|---------------------------------------------------------------------|-----------------------------------------------|---------|-----------------------------------------------|------------------------------------------------------|
| SOC1                                                                | AE1                                           | score   | AE2                                           | SOC2                                                 |
| Investigations                                                      | Sperm count increased                         | 0.85664 | Injection site abscess                        | Infections and infestations                          |
| Endocrine disorders                                                 | Cushing's syndrome                            | 0.85662 | Leukoderma                                    | Skin and subcutaneous tissue disorders               |
| Congenital, familial and genetic disorders                          | Limb reduction defect                         | 0.85660 | Orgasm abnormal                               | Psychiatric disorders                                |
| Endocrine disorders                                                 | Hypopituitarism                               | 0.85644 | Fluid imbalance                               | Metabolism and nutrition disorders                   |
| Skin and subcutaneous tissue disorders                              | Red man syndrome                              | 0.85632 | Choluria                                      | Renal and urinary disorders                          |
| Investigations                                                      | Urine vitamin K decreased                     | 0.85632 | Choluria                                      | Renal and urinary disorders                          |
| Infections and infestations                                         | Dysentery                                     | 0.85632 | Blood 1,25-dihydroxycholecalciferol decreased | Investigations                                       |
| Investigations                                                      | Blood 1,25-dihydroxycholecalciferol decreased | 0.85632 | Choluria                                      | Renal and urinary disorders                          |
| Eye disorders                                                       | Tear discolouration                           | 0.85632 | Choluria                                      | Renal and urinary disorders                          |
| Gastrointestinal disorders                                          | Saliva discolouration                         | 0.85632 | Dysentery                                     | Infections and infestations                          |
| Eye disorders                                                       | Tear discolouration                           | 0.85632 | Dysentery                                     | Infections and infestations                          |
| Infections and infestations                                         | Dysentery                                     | 0.85632 | Red man syndrome                              | Skin and subcutaneous tissue disorders               |
| Gastrointestinal disorders                                          | Saliva discolouration                         | 0.85632 | Choluria                                      | Renal and urinary disorders                          |
| Infections and infestations                                         | Dysentery                                     | 0.85632 | Urine vitamin K decreased                     | Investigations                                       |
| Neoplasms benign, malignant and unspecified (incl cysts and polyps) | Tumour lysis syndrome                         | 0.85629 | Immunosuppression                             | Immune system disorders                              |
| Reproductive system and breast disorders                            | Ejaculation failure                           | 0.85622 | Dyskinesia oesophageal                        | Gastrointestinal disorders                           |
| Metabolism and nutrition disorders                                  | Catabolic state                               | 0.85621 | Injection site abscess sterile                | General disorders and administration site conditions |
| Investigations                                                      | Acoustic stimulation tests abnormal           | 0.85621 | Electromyogram abnormal                       | Investigations                                       |
| Endocrine disorders                                                 | Cushing's syndrome                            | 0.85621 | Skin hypopigmentation                         | Skin and subcutaneous tissue disorders               |
| Gastrointestinal disorders                                          | Lip disorder                                  | 0.85620 | Scleral disorder                              | Eye disorders                                        |

| Basis data for network                                              |                                      |         |                                    |                                                      |
|---------------------------------------------------------------------|--------------------------------------|---------|------------------------------------|------------------------------------------------------|
| SOC1                                                                | AE1                                  | score   | AE2                                | SOC2                                                 |
| Eye disorders                                                       | Scleral disorder                     | 0.85620 | Dysplasia                          | General disorders and administration site conditions |
| Investigations                                                      | Intraocular pressure test abnormal   | 0.85620 | Lip disorder                       | Gastrointestinal disorders                           |
| General disorders and administration site conditions                | Dysplasia                            | 0.85620 | Intraocular pressure test abnormal | Investigations                                       |
| Psychiatric disorders                                               | Orgasm abnormal                      | 0.85614 | Sperm count increased              | Investigations                                       |
| Skin and subcutaneous tissue disorders                              | Skin depigmentation                  | 0.85610 | Panniculitis                       | Skin and subcutaneous tissue disorders               |
| Nervous system disorders                                            | Facial spasm                         | 0.85609 | Tourette's disorder                | Congenital, familial and genetic disorders           |
| Injury, poisoning and procedural complications                      | Spinal fracture                      | 0.85604 | Gastroduodenal ulcer               | Gastrointestinal disorders                           |
| Skin and subcutaneous tissue disorders                              | Skin hypopigmentation                | 0.85596 | Adrenal suppression                | Endocrine disorders                                  |
| General disorders and administration site conditions                | Injection site nodule                | 0.85587 | Cardiac output decreased           | Investigations                                       |
| Psychiatric disorders                                               | Orgasm abnormal                      | 0.85584 | Stereotypic movement disorder      | Psychiatric disorders                                |
| Congenital, familial and genetic disorders                          | Limb reduction defect                | 0.85582 | Cardiac output decreased           | Investigations                                       |
| Investigations                                                      | Blood antidiuretic hormone increased | 0.85580 | Cardiac output decreased           | Investigations                                       |
| Reproductive system and breast disorders                            | Testis discomfort                    | 0.85561 | Femoral neck fracture              | Injury, poisoning and procedural complications       |
| Injury, poisoning and procedural complications                      | Radius fracture                      | 0.85561 | Femoral neck fracture              | Injury, poisoning and procedural complications       |
| Neoplasms benign, malignant and unspecified (incl cysts and polyps) | Throat cancer                        | 0.85561 | Femoral neck fracture              | Injury, poisoning and procedural complications       |
| Injury, poisoning and procedural complications                      | Femoral neck fracture                | 0.85561 | Blood growth hormone abnormal      | Investigations                                       |
| General disorders and administration site conditions                | Implant expulsion                    | 0.85561 | Femoral neck fracture              | Injury, poisoning and procedural complications       |
| Infections and infestations                                         | Listeriosis                          | 0.85561 | Femoral neck fracture              | Injury, poisoning and procedural complications       |
| Injury, poisoning and procedural complications                      | Femoral neck fracture                | 0.85561 | Pleural rub                        | Respiratory, thoracic and mediastinal disorders      |
| Injury, poisoning and procedural complications                      | Femoral neck fracture                | 0.85561 | Rectal polyp                       | Gastrointestinal disorders                           |

| Basis data for network                          |                          |         |                                 |                                                      |
|-------------------------------------------------|--------------------------|---------|---------------------------------|------------------------------------------------------|
| SOC1                                            | AE1                      | score   | AE2                             | SOC2                                                 |
| Injury, poisoning and procedural complications  | Femoral neck fracture    | 0.85561 | Injection site paraesthesia     | General disorders and administration site conditions |
| Nervous system disorders                        | Facial spasm             | 0.85561 | Ejaculation failure             | Reproductive system and breast disorders             |
| Respiratory, thoracic and mediastinal disorders | Pulmonary granuloma      | 0.85555 | Cough decreased                 | Respiratory, thoracic and mediastinal disorders      |
| Investigations                                  | Immunoglobulins abnormal | 0.85549 | Cleft lip and palate            | Congenital, familial and genetic disorders           |
| Respiratory, thoracic and mediastinal disorders | Laryngeal obstruction    | 0.85545 | Peptic ulcer perforation        | Gastrointestinal disorders                           |
| Eye disorders                                   | Chorioretinopathy        | 0.85545 | Peptic ulcer perforation        | Gastrointestinal disorders                           |
| Investigations                                  | Blood chromium decreased | 0.85545 | Peptic ulcer perforation        | Gastrointestinal disorders                           |
| Eye disorders                                   | Scleromalacia            | 0.85545 | Peptic ulcer perforation        | Gastrointestinal disorders                           |
| Gastrointestinal disorders                      | Peptic ulcer perforation | 0.85545 | Nasal mucosa atrophy            | Respiratory, thoracic and mediastinal disorders      |
| Gastrointestinal disorders                      | Peptic ulcer perforation | 0.85545 | Posterior capsule opacification | Eye disorders                                        |
| Injury, poisoning and procedural complications  | Tendon injury            | 0.85545 | Peptic ulcer perforation        | Gastrointestinal disorders                           |
| Gastrointestinal disorders                      | Peptic ulcer perforation | 0.85545 | Scoliosis                       | Musculoskeletal and connective tissue disorders      |
| Eye disorders                                   | Cataract subcapsular     | 0.85528 | Large intestine perforation     | Gastrointestinal disorders                           |
| Reproductive system and breast disorders        | Breast engorgement       | 0.85519 | Laryngeal disorder              | Respiratory, thoracic and mediastinal disorders      |
| Nervous system disorders                        | Areflexia                | 0.85511 | Injection site nodule           | General disorders and administration site conditions |
| Skin and subcutaneous tissue disorders          | Skin depigmentation      | 0.85505 | Hip fracture                    | Injury, poisoning and procedural complications       |
| Skin and subcutaneous tissue disorders          | Skin fragility           | 0.85485 | Skin atrophy                    | Skin and subcutaneous tissue disorders               |
| Metabolism and nutrition disorders              | Catabolic state          | 0.85484 | Optic neuropathy                | Eye disorders                                        |
| Nervous system disorders                        | Nerve degeneration       | 0.85482 | Neutropenic colitis             | Gastrointestinal disorders                           |
| Congenital, familial and genetic disorders      | Tooth hypoplasia         | 0.85474 | Hyperphosphaturia               | Renal and urinary disorders                          |

| Basis data for network                          |                                 |         |                                            |                                                      |
|-------------------------------------------------|---------------------------------|---------|--------------------------------------------|------------------------------------------------------|
| SOC1                                            | AE1                             | score   | AE2                                        | SOC2                                                 |
| Investigations                                  | Nitrogen balance negative       | 0.85467 | Peptic ulcer perforation                   | Gastrointestinal disorders                           |
| Injury, poisoning and procedural complications  | Spinal compression fracture     | 0.85464 | Body fat disorder                          | Metabolism and nutrition disorders                   |
| Metabolism and nutrition disorders              | Fluid imbalance                 | 0.85458 | Fat atrophy                                | Skin and subcutaneous tissue disorders               |
| Gastrointestinal disorders                      | Dyskinesia oesophageal          | 0.85448 | Cardiac output decreased                   | Investigations                                       |
| Eye disorders                                   | Exophthalmos                    | 0.85446 | Adrenocortical insufficiency acute         | Endocrine disorders                                  |
| Eye disorders                                   | Retinal pigmentation            | 0.85436 | Orgasm abnormal                            | Psychiatric disorders                                |
| Musculoskeletal and connective tissue disorders | Growth retardation              | 0.85433 | Skin striae                                | Skin and subcutaneous tissue disorders               |
| Endocrine disorders                             | Hypothalamo-pituitary disorders | 0.85431 | General symptom                            | General disorders and administration site conditions |
| Investigations                                  | Cardiac output decreased        | 0.85430 | Pregnancy test false positive              | Investigations                                       |
| Skin and subcutaneous tissue disorders          | Leukoderma                      | 0.85429 | Skin depigmentation                        | Skin and subcutaneous tissue disorders               |
| Respiratory, thoracic and mediastinal disorders | Acute respiratory failure       | 0.85425 | Asphyxia                                   | Respiratory, thoracic and mediastinal disorders      |
| Investigations                                  | Blood growth hormone increased  | 0.85423 | Orgasm abnormal                            | Psychiatric disorders                                |
| Endocrine disorders                             | Hypopituitarism                 | 0.85419 | Hypercoagulation                           | Blood and lymphatic system disorders                 |
| Investigations                                  | CSF protein abnormal            | 0.85404 | Congenital pneumonia                       | Congenital, familial and genetic disorders           |
| Investigations                                  | CSF protein abnormal            | 0.85404 | Cephalin flocculation                      | Investigations                                       |
| Metabolism and nutrition disorders              | Glucose tolerance impaired      | 0.85397 | Grey syndrome neonatal                     | Cardiac disorders                                    |
| Skin and subcutaneous tissue disorders          | Fat atrophy                     | 0.85386 | Urine calcium increased                    | Investigations                                       |
| Infections and infestations                     | Corneal infection               | 0.85369 | Gastroduodenal ulcer                       | Gastrointestinal disorders                           |
| Skin and subcutaneous tissue disorders          | Skin fragility                  | 0.85367 | Peptic ulcer perforation                   | Gastrointestinal disorders                           |
| Psychiatric disorders                           | Stereotypic movement disorder   | 0.85358 | Spermatozoa progressive motility decreased | Investigations                                       |



| Basis data for network                               |                                              |         |                                     |                                                      |
|------------------------------------------------------|----------------------------------------------|---------|-------------------------------------|------------------------------------------------------|
| SOC1                                                 | AE1                                          | score   | AE2                                 | SOC2                                                 |
| General disorders and administration site conditions | Injection site nodule                        | 0.85350 | Ejaculation failure                 | Reproductive system and breast disorders             |
| Gastrointestinal disorders                           | Peptic ulcer perforation                     | 0.85349 | Fluid imbalance                     | Metabolism and nutrition disorders                   |
| Gastrointestinal disorders                           | Large intestine perforation                  | 0.85348 | Body fat disorder                   | Metabolism and nutrition disorders                   |
| Endocrine disorders                                  | Hypothalamo-pituitary disorders              | 0.85335 | Oropharyngeal candidiasis           | Infections and infestations                          |
| Cardiac disorders                                    | Intracardiac thrombus                        | 0.85334 | Papillary muscle disorder           | Cardiac disorders                                    |
| Blood and lymphatic system disorders                 | Pernicious anaemia                           | 0.85334 | Intracardiac thrombus               | Cardiac disorders                                    |
| Investigations                                       | Reverse tri-iodothyronine increased          | 0.85334 | Intracardiac thrombus               | Cardiac disorders                                    |
| Cardiac disorders                                    | Intracardiac thrombus                        | 0.85334 | Thyroxine free decreased            | Investigations                                       |
| Respiratory, thoracic and mediastinal disorders      | Asphyxia                                     | 0.85330 | Areflexia                           | Nervous system disorders                             |
| Eye disorders                                        | Cataract subcapsular                         | 0.85326 | Hip fracture                        | Injury, poisoning and procedural complications       |
| Immune system disorders                              | Serum sickness                               | 0.85312 | Jarisch-Herxheimer reaction         | Immune system disorders                              |
| Investigations                                       | Blood follicle stimulating hormone increased | 0.85305 | Injection site extravasation        | General disorders and administration site conditions |
| Respiratory, thoracic and mediastinal disorders      | Nasal septum disorder                        | 0.85290 | Ocular hypertension                 | Eye disorders                                        |
| Eye disorders                                        | Cataract subcapsular                         | 0.85282 | Cushing's syndrome                  | Endocrine disorders                                  |
| General disorders and administration site conditions | Injection site abscess sterile               | 0.85272 | Conjunctival bleb                   | Eye disorders                                        |
| Infections and infestations                          | Corneal infection                            | 0.85269 | Optic neuropathy                    | Eye disorders                                        |
| Eye disorders                                        | Optic ischaemic neuropathy                   | 0.85250 | Acoustic stimulation tests abnormal | Investigations                                       |
| Nervous system disorders                             | Trigeminal neuralgia                         | 0.85243 | Global amnesia                      | Nervous system disorders                             |
| Metabolism and nutrition disorders                   | Fluid imbalance                              | 0.85240 | Aortic aneurysm                     | Vascular disorders                                   |
| Renal and urinary disorders                          | Bladder stenosis                             | 0.85238 | Ureteral spasm                      | Renal and urinary disorders                          |

| Basis data for network                                              |                                 |         |                          |                                                                     |
|---------------------------------------------------------------------|---------------------------------|---------|--------------------------|---------------------------------------------------------------------|
| SOC1                                                                | AE1                             | score   | AE2                      | SOC2                                                                |
| Investigations                                                      | Bile output decreased           | 0.85238 | Ureteral spasm           | Renal and urinary disorders                                         |
| Skin and subcutaneous tissue disorders                              | Panniculitis                    | 0.85233 | Cushingoid               | Endocrine disorders                                                 |
| Nervous system disorders                                            | Cranial nerve disorder          | 0.85222 | Facial paresis           | Nervous system disorders                                            |
| Investigations                                                      | Urine calcium increased         | 0.85222 | Hypercoagulation         | Blood and lymphatic system disorders                                |
| Congenital, familial and genetic disorders                          | Tourette's disorder             | 0.85217 | Aspiration               | Respiratory, thoracic and mediastinal disorders                     |
| Injury, poisoning and procedural complications                      | Hip fracture                    | 0.85207 | Aortic aneurysm          | Vascular disorders                                                  |
| Congenital, familial and genetic disorders                          | Pulmonary hypoplasia            | 0.85195 | Patent ductus arteriosus | Congenital, familial and genetic disorders                          |
| Vascular disorders                                                  | Neonatal hypotension            | 0.85195 | Patent ductus arteriosus | Congenital, familial and genetic disorders                          |
| Investigations                                                      | Blood sodium abnormal           | 0.85193 | Vitamin K deficiency     | Metabolism and nutrition disorders                                  |
| Reproductive system and breast disorders                            | Vaginal odour                   | 0.85191 | Vaginal erythema         | Reproductive system and breast disorders                            |
| Gastrointestinal disorders                                          | Mesenteric artery embolism      | 0.85188 | Arterial insufficiency   | Vascular disorders                                                  |
| Eye disorders                                                       | Posterior capsule opacification | 0.85178 | Tumour lysis syndrome    | Neoplasms benign, malignant and unspecified (incl cysts and polyps) |
| Musculoskeletal and connective tissue disorders                     | Scoliosis                       | 0.85178 | Tumour lysis syndrome    | Neoplasms benign, malignant and unspecified (incl cysts and polyps) |
| Neoplasms benign, malignant and unspecified (incl cysts and polyps) | Tumour lysis syndrome           | 0.85178 | Chorioretinopathy        | Eye disorders                                                       |
| Neoplasms benign, malignant and unspecified (incl cysts and polyps) | Tumour lysis syndrome           | 0.85178 | Scleromalacia            | Eye disorders                                                       |
| Respiratory, thoracic and mediastinal disorders                     | Nasal mucosa atrophy            | 0.85178 | Tumour lysis syndrome    | Neoplasms benign, malignant and unspecified (incl cysts and polyps) |
| Neoplasms benign, malignant and unspecified (incl cysts and polyps) | Tumour lysis syndrome           | 0.85178 | Tendon injury            | Injury, poisoning and procedural complications                      |
| Respiratory, thoracic and mediastinal disorders                     | Laryngeal obstruction           | 0.85178 | Tumour lysis syndrome    | Neoplasms benign, malignant and unspecified (incl cysts and polyps) |
| Neoplasms benign, malignant and unspecified (incl cysts and polyps) | Tumour lysis syndrome           | 0.85178 | Blood chromium decreased | Investigations                                                      |
| General disorders and administration site conditions                | Impaired healing                | 0.85173 | Hypopituitarism          | Endocrine disorders                                                 |

| Basis data for network                          |                                  |         |                                              |                                                      |
|-------------------------------------------------|----------------------------------|---------|----------------------------------------------|------------------------------------------------------|
| SOC1                                            | AE1                              | score   | AE2                                          | SOC2                                                 |
| Investigations                                  | Urine calcium increased          | 0.85170 | Fluid imbalance                              | Metabolism and nutrition disorders                   |
| Investigations                                  | Dehydroepiandrosterone increased | 0.85158 | Blood follicle stimulating hormone decreased | Investigations                                       |
| Eye disorders                                   | Optic neuropathy                 | 0.85156 | Spinal fracture                              | Injury, poisoning and procedural complications       |
| Reproductive system and breast disorders        | Vaginal erosion                  | 0.85144 | Alcohol interaction                          | General disorders and administration site conditions |
| Cardiac disorders                               | Grey syndrome neonatal           | 0.85136 | Peptic ulcer perforation                     | Gastrointestinal disorders                           |
| Gastrointestinal disorders                      | Mesenteric occlusion             | 0.85136 | Tongue spasm                                 | Gastrointestinal disorders                           |
| Musculoskeletal and connective tissue disorders | Muscle atrophy                   | 0.85135 | Secondary adrenocortical insufficiency       | Endocrine disorders                                  |
| Nervous system disorders                        | Areflexia                        | 0.85127 | Facial spasm                                 | Nervous system disorders                             |
| Infections and infestations                     | Candida pneumonia                | 0.85125 | Neutropenic colitis                          | Gastrointestinal disorders                           |
| Endocrine disorders                             | Virilism                         | 0.85105 | Hypopituitarism                              | Endocrine disorders                                  |
| Investigations                                  | Platelet function test abnormal  | 0.85072 | Blood sodium abnormal                        | Investigations                                       |
| Reproductive system and breast disorders        | Ejaculation failure              | 0.85071 | Liver function test                          | Investigations                                       |
| Investigations                                  | Oestradiol decreased             | 0.85070 | Ureteric obstruction                         | Renal and urinary disorders                          |
| Investigations                                  | Oestradiol decreased             | 0.85070 | Scrotal infection                            | Infections and infestations                          |
| Injury, poisoning and procedural complications  | Scrotal haematoma                | 0.85070 | Oestradiol decreased                         | Investigations                                       |
| Investigations                                  | Oestradiol decreased             | 0.85070 | Ovarian atrophy                              | Reproductive system and breast disorders             |
| Investigations                                  | Urine potassium increased        | 0.85067 | Relapsing fever                              | Infections and infestations                          |
| Vascular disorders                              | Vasculitis necrotising           | 0.85055 | Xanthopsia                                   | Eye disorders                                        |
| Skin and subcutaneous tissue disorders          | Panniculitis                     | 0.85055 | Hypercatabolism                              | Metabolism and nutrition disorders                   |
| Infections and infestations                     | Lung abscess                     | 0.85053 | Sputum abnormal                              | Investigations                                       |

| Basis data for network                                              |                                     |         |                                 |                                                 |
|---------------------------------------------------------------------|-------------------------------------|---------|---------------------------------|-------------------------------------------------|
| SOC1                                                                | AE1                                 | score   | AE2                             | SOC2                                            |
| Investigations                                                      | Sputum abnormal                     | 0.85053 | Pulmonary tuberculosis          | Infections and infestations                     |
| Investigations                                                      | Sputum abnormal                     | 0.85053 | Haemophilus sepsis              | Infections and infestations                     |
| Psychiatric disorders                                               | Orgasm abnormal                     | 0.85050 | Choreoathetosis                 | Nervous system disorders                        |
| Nervous system disorders                                            | Cerebral venous thrombosis          | 0.85050 | Skin depigmentation             | Skin and subcutaneous tissue disorders          |
| Renal and urinary disorders                                         | Choluria                            | 0.85044 | Vitamin D decreased             | Investigations                                  |
| Gastrointestinal disorders                                          | Gastritis alcoholic                 | 0.85044 | Choluria                        | Renal and urinary disorders                     |
| Neoplasms benign, malignant and unspecified (incl cysts and polyps) | Lung adenocarcinoma                 | 0.85044 | Dysentery                       | Infections and infestations                     |
| Investigations                                                      | Blood uric acid                     | 0.85044 | Choluria                        | Renal and urinary disorders                     |
| Neoplasms benign, malignant and unspecified (incl cysts and polyps) | Lung adenocarcinoma                 | 0.85044 | Choluria                        | Renal and urinary disorders                     |
| Investigations                                                      | Blood uric acid                     | 0.85044 | Dysentery                       | Infections and infestations                     |
| Gastrointestinal disorders                                          | Gastritis alcoholic                 | 0.85044 | Dysentery                       | Infections and infestations                     |
| Investigations                                                      | Vitamin D decreased                 | 0.85044 | Dysentery                       | Infections and infestations                     |
| Endocrine disorders                                                 | Hypopituitarism                     | 0.85041 | Hypercatabolism                 | Metabolism and nutrition disorders              |
| Reproductive system and breast disorders                            | Retrograde ejaculation              | 0.85037 | Cardiac output decreased        | Investigations                                  |
| Infections and infestations                                         | Corneal infection                   | 0.85036 | Hypercorticism                  | Endocrine disorders                             |
| Skin and subcutaneous tissue disorders                              | Dermatomyositis                     | 0.85030 | Facial paresis                  | Nervous system disorders                        |
| Investigations                                                      | Acoustic stimulation tests abnormal | 0.85029 | Allergic granulomatous angiitis | Respiratory, thoracic and mediastinal disorders |
| Musculoskeletal and connective tissue disorders                     | Osteitis                            | 0.85027 | Inflammatory bowel disease      | Gastrointestinal disorders                      |
| Reproductive system and breast disorders                            | Retrograde ejaculation              | 0.85024 | Injection site abscess          | Infections and infestations                     |
| Endocrine disorders                                                 | Hypopituitarism                     | 0.85023 | Leukoderma                      | Skin and subcutaneous tissue disorders          |

| Basis data for network                               |                                |         |                                 |                                                      |
|------------------------------------------------------|--------------------------------|---------|---------------------------------|------------------------------------------------------|
| SOC1                                                 | AE1                            | score   | AE2                             | SOC2                                                 |
| General disorders and administration site conditions | Injection site abscess sterile | 0.85015 | Exophthalmos                    | Eye disorders                                        |
| Skin and subcutaneous tissue disorders               | Ephelides                      | 0.84991 | Injection site hypersensitivity | General disorders and administration site conditions |
| Skin and subcutaneous tissue disorders               | Ephelides                      | 0.84991 | Post thrombotic syndrome        | Vascular disorders                                   |
| Reproductive system and breast disorders             | Ejaculation failure            | 0.84981 | Orgasm abnormal                 | Psychiatric disorders                                |
| Congenital, familial and genetic disorders           | Inborn error of metabolism     | 0.84976 | Glomerular filtration rate      | Investigations                                       |
| Investigations                                       | Urine osmolarity               | 0.84976 | Urine osmolarity decreased      | Investigations                                       |
| Investigations                                       | Urine osmolarity               | 0.84976 | Inborn error of metabolism      | Congenital, familial and genetic disorders           |
| Musculoskeletal and connective tissue disorders      | Joint destruction              | 0.84976 | Glomerular filtration rate      | Investigations                                       |
| Investigations                                       | Urine osmolarity               | 0.84976 | Rectal perforation              | Gastrointestinal disorders                           |
| Musculoskeletal and connective tissue disorders      | Joint destruction              | 0.84976 | Urine osmolarity                | Investigations                                       |
| Investigations                                       | Glomerular filtration rate     | 0.84976 | Rectal perforation              | Gastrointestinal disorders                           |
| Investigations                                       | Urine osmolarity decreased     | 0.84976 | Glomerular filtration rate      | Investigations                                       |
| Skin and subcutaneous tissue disorders               | Skin fragility                 | 0.84961 | Exophthalmos                    | Eye disorders                                        |
| Eye disorders                                        | Macular vasospasm              | 0.84954 | Cells in urine                  | Investigations                                       |
| Musculoskeletal and connective tissue disorders      | Neuropathic arthropathy        | 0.84942 | Hypothalamo-pituitary disorders | Endocrine disorders                                  |
| Respiratory, thoracic and mediastinal disorders      | Acute respiratory failure      | 0.84938 | Tourette's disorder             | Congenital, familial and genetic disorders           |
| Infections and infestations                          | Pathogen resistance            | 0.84937 | Carotene decreased              | Investigations                                       |
| Skin and subcutaneous tissue disorders               | Skin striae                    | 0.84928 | Leukoderma                      | Skin and subcutaneous tissue disorders               |
| Psychiatric disorders                                | Stereotypic movement disorder  | 0.84926 | Injection site abscess          | Infections and infestations                          |
| Metabolism and nutrition disorders                   | Glucose tolerance impaired     | 0.84925 | Skin fragility                  | Skin and subcutaneous tissue disorders               |

| Basis data for network                          |                                        |         |                               |                                                      |
|-------------------------------------------------|----------------------------------------|---------|-------------------------------|------------------------------------------------------|
| SOC1                                            | AE1                                    | score   | AE2                           | SOC2                                                 |
| Injury, poisoning and procedural complications  | Chemical cystitis                      | 0.84923 | Diastolic dysfunction         | Cardiac disorders                                    |
| Eye disorders                                   | Macular vasospasm                      | 0.84923 | Deafness permanent            | Ear and labyrinth disorders                          |
| Endocrine disorders                             | Secondary adrenocortical insufficiency | 0.84920 | Impaired healing              | General disorders and administration site conditions |
| Nervous system disorders                        | Areflexia                              | 0.84915 | Stereotypic movement disorder | Psychiatric disorders                                |
| Nervous system disorders                        | Myelopathy                             | 0.84914 | Illrd nerve disorder          | Nervous system disorders                             |
| Investigations                                  | Prothrombin time abnormal              | 0.84912 | Erythroblast count decreased  | Investigations                                       |
| Respiratory, thoracic and mediastinal disorders | Foreign body aspiration                | 0.84902 | Congenital pneumonia          | Congenital, familial and genetic disorders           |
| Respiratory, thoracic and mediastinal disorders | Foreign body aspiration                | 0.84902 | Cephalin flocculation         | Investigations                                       |
| Endocrine disorders                             | Adrenocortical insufficiency acute     | 0.84894 | Impaired healing              | General disorders and administration site conditions |
| Cardiac disorders                               | Arteriospasm coronary                  | 0.84891 | Learning disorder             | Psychiatric disorders                                |
| Musculoskeletal and connective tissue disorders | Growth retardation                     | 0.84887 | Skin fragility                | Skin and subcutaneous tissue disorders               |
| Infections and infestations                     | Lobar pneumonia                        | 0.84876 | Bilirubinuria                 | Renal and urinary disorders                          |
| Renal and urinary disorders                     | Bilirubinuria                          | 0.84876 | Drug level increased          | Investigations                                       |
| Renal and urinary disorders                     | Bilirubinuria                          | 0.84876 | Haematocrit                   | Investigations                                       |
| Renal and urinary disorders                     | Bilirubinuria                          | 0.84876 | Haemoglobin                   | Investigations                                       |
| Investigations                                  | Blood electrolytes increased           | 0.84876 | Bilirubinuria                 | Renal and urinary disorders                          |
| Investigations                                  | Electrophoresis abnormal               | 0.84876 | Bilirubinuria                 | Renal and urinary disorders                          |
| Reproductive system and breast disorders        | Breast engorgement                     | 0.84868 | Aspiration                    | Respiratory, thoracic and mediastinal disorders      |
| Skin and subcutaneous tissue disorders          | Leukoderma                             | 0.84865 | Fluid imbalance               | Metabolism and nutrition disorders                   |
| Blood and lymphatic system disorders            | Polycythaemia                          | 0.84863 | Catabolic state               | Metabolism and nutrition disorders                   |

| Basis data for network                               |                               |         |                                            |                                                                     |
|------------------------------------------------------|-------------------------------|---------|--------------------------------------------|---------------------------------------------------------------------|
| SOC1                                                 | AE1                           | score   | AE2                                        | SOC2                                                                |
| Pregnancy, puerperium and perinatal conditions       | Oligohydramnios               | 0.84851 | Extremity contracture                      | Musculoskeletal and connective tissue disorders                     |
| Investigations                                       | Granulocytes abnormal         | 0.84845 | Basophil count abnormal                    | Investigations                                                      |
| Renal and urinary disorders                          | Renal failure neonatal        | 0.84843 | Foetal growth retardation                  | Pregnancy, puerperium and perinatal conditions                      |
| Musculoskeletal and connective tissue disorders      | Muscle atrophy                | 0.84837 | Hypopituitarism                            | Endocrine disorders                                                 |
| Psychiatric disorders                                | Orgasm abnormal               | 0.84836 | Tardive dyskinesia                         | Nervous system disorders                                            |
| Investigations                                       | Prothrombin time abnormal     | 0.84835 | Prothrombin time ratio abnormal            | Investigations                                                      |
| Nervous system disorders                             | Cerebral venous thrombosis    | 0.84826 | Adrenal suppression                        | Endocrine disorders                                                 |
| Nervous system disorders                             | Areflexia                     | 0.84822 | Pregnancy test false positive              | Investigations                                                      |
| Eye disorders                                        | Retinal pigmentation          | 0.84820 | Spermatozoa progressive motility decreased | Investigations                                                      |
| Eye disorders                                        | Cataract subcapsular          | 0.84818 | Muscle atrophy                             | Musculoskeletal and connective tissue disorders                     |
| Skin and subcutaneous tissue disorders               | Fat atrophy                   | 0.84813 | Tendon rupture                             | Injury, poisoning and procedural complications                      |
| Injury, poisoning and procedural complications       | Spinal fracture               | 0.84809 | Myocardial rupture                         | Cardiac disorders                                                   |
| Blood and lymphatic system disorders                 | Hypercoagulation              | 0.84805 | Hypercatabolism                            | Metabolism and nutrition disorders                                  |
| Eye disorders                                        | Conjunctival bleb             | 0.84803 | Adrenocortical insufficiency acute         | Endocrine disorders                                                 |
| Metabolism and nutrition disorders                   | Alkalosis hypokalaemic        | 0.84803 | Tendon rupture                             | Injury, poisoning and procedural complications                      |
| Respiratory, thoracic and mediastinal disorders      | Pleural rub                   | 0.84774 | Application site bruising                  | General disorders and administration site conditions                |
| Investigations                                       | Blood growth hormone abnormal | 0.84774 | Application site bruising                  | General disorders and administration site conditions                |
| General disorders and administration site conditions | Application site bruising     | 0.84774 | Injection site paraesthesia                | General disorders and administration site conditions                |
| General disorders and administration site conditions | Application site bruising     | 0.84774 | Throat cancer                              | Neoplasms benign, malignant and unspecified (incl cysts and polyps) |
| General disorders and administration site conditions | Application site bruising     | 0.84774 | Testis discomfort                          | Reproductive system and breast disorders                            |

| Basis data for network                               |                            |         |                               |                                                      |
|------------------------------------------------------|----------------------------|---------|-------------------------------|------------------------------------------------------|
| SOC1                                                 | AE1                        | score   | AE2                           | SOC2                                                 |
| Infections and infestations                          | Listeriosis                | 0.84774 | Application site bruising     | General disorders and administration site conditions |
| Gastrointestinal disorders                           | Rectal polyp               | 0.84774 | Application site bruising     | General disorders and administration site conditions |
| General disorders and administration site conditions | Application site bruising  | 0.84774 | Implant expulsion             | General disorders and administration site conditions |
| Injury, poisoning and procedural complications       | Radius fracture            | 0.84774 | Application site bruising     | General disorders and administration site conditions |
| Ear and labyrinth disorders                          | Deafness permanent         | 0.84758 | Cells in urine                | Investigations                                       |
| Endocrine disorders                                  | Thyrotoxic crisis          | 0.84756 | Uterine perforation           | Reproductive system and breast disorders             |
| Gastrointestinal disorders                           | Gastroduodenal ulcer       | 0.84746 | Eye inflammation              | Eye disorders                                        |
| Vascular disorders                                   | Intermittent claudication  | 0.84743 | Myotonia                      | Nervous system disorders                             |
| Nervous system disorders                             | Areflexia                  | 0.84738 | Retrograde ejaculation        | Reproductive system and breast disorders             |
| Skin and subcutaneous tissue disorders               | Skin fragility             | 0.84738 | Fluid imbalance               | Metabolism and nutrition disorders                   |
| Respiratory, thoracic and mediastinal disorders      | Aspiration                 | 0.84732 | Obsessive-compulsive disorder | Psychiatric disorders                                |
| Investigations                                       | Lipids increased           | 0.84720 | Retinal oedema                | Eye disorders                                        |
| Reproductive system and breast disorders             | Breast engorgement         | 0.84718 | Orgasm abnormal               | Psychiatric disorders                                |
| Injury, poisoning and procedural complications       | Tendon rupture             | 0.84714 | Myopathy steroid              | Musculoskeletal and connective tissue disorders      |
| Congenital, familial and genetic disorders           | Meningocele                | 0.84704 | Hypertonia neonatal           | Musculoskeletal and connective tissue disorders      |
| Nervous system disorders                             | Convulsion neonatal        | 0.84704 | Hypoglycaemia unawareness     | Metabolism and nutrition disorders                   |
| Injury, poisoning and procedural complications       | Cephalhaematoma            | 0.84704 | Convulsion neonatal           | Nervous system disorders                             |
| Congenital, familial and genetic disorders           | Chondrodystrophy           | 0.84704 | Hypertonia neonatal           | Musculoskeletal and connective tissue disorders      |
| Injury, poisoning and procedural complications       | Cephalhaematoma            | 0.84704 | Cyanosis neonatal             | Respiratory, thoracic and mediastinal disorders      |
| Infections and infestations                          | Pneumonia primary atypical | 0.84704 | Hypertonia neonatal           | Musculoskeletal and connective tissue disorders      |



| Basis data for network                          |                             |         |                            |                                                 |
|-------------------------------------------------|-----------------------------|---------|----------------------------|-------------------------------------------------|
| SOC1                                            | AE1                         | score   | AE2                        | SOC2                                            |
| Injury, poisoning and procedural complications  | Cephalhaematoma             | 0.84704 | Hypertonia neonatal        | Musculoskeletal and connective tissue disorders |
| Respiratory, thoracic and mediastinal disorders | Cyanosis neonatal           | 0.84704 | Chronic hepatitis          | Hepatobiliary disorders                         |
| Infections and infestations                     | Pneumonia primary atypical  | 0.84704 | Convulsion neonatal        | Nervous system disorders                        |
| Metabolism and nutrition disorders              | Hypoglycaemia unawareness   | 0.84704 | Cyanosis neonatal          | Respiratory, thoracic and mediastinal disorders |
| Nervous system disorders                        | Convulsion neonatal         | 0.84704 | Chronic hepatitis          | Hepatobiliary disorders                         |
| Nervous system disorders                        | Convulsion neonatal         | 0.84704 | Meningocele                | Congenital, familial and genetic disorders      |
| Musculoskeletal and connective tissue disorders | Hypertonia neonatal         | 0.84704 | Chronic hepatitis          | Hepatobiliary disorders                         |
| Congenital, familial and genetic disorders      | Meningocele                 | 0.84704 | Cyanosis neonatal          | Respiratory, thoracic and mediastinal disorders |
| Musculoskeletal and connective tissue disorders | Hypertonia neonatal         | 0.84704 | Hypoglycaemia unawareness  | Metabolism and nutrition disorders              |
| Nervous system disorders                        | Convulsion neonatal         | 0.84704 | Chondrodystrophy           | Congenital, familial and genetic disorders      |
| Respiratory, thoracic and mediastinal disorders | Cyanosis neonatal           | 0.84704 | Pneumonia primary atypical | Infections and infestations                     |
| Congenital, familial and genetic disorders      | Chondrodystrophy            | 0.84704 | Cyanosis neonatal          | Respiratory, thoracic and mediastinal disorders |
| Gastrointestinal disorders                      | Peptic ulcer perforation    | 0.84700 | Corneal infection          | Infections and infestations                     |
| Respiratory, thoracic and mediastinal disorders | Dysaesthesia pharynx        | 0.84697 | Lhermitte's sign           | Nervous system disorders                        |
| Nervous system disorders                        | Lhermitte's sign            | 0.84697 | Hepatic vein occlusion     | Hepatobiliary disorders                         |
| Nervous system disorders                        | Lhermitte's sign            | 0.84697 | Oropharyngeal spasm        | Respiratory, thoracic and mediastinal disorders |
| Eye disorders                                   | Retinal pigmentation        | 0.84692 | Ejaculation failure        | Reproductive system and breast disorders        |
| Investigations                                  | Nitrogen balance negative   | 0.84684 | Growth retardation         | Musculoskeletal and connective tissue disorders |
| Injury, poisoning and procedural complications  | Hip fracture                | 0.84678 | Body fat disorder          | Metabolism and nutrition disorders              |
| Gastrointestinal disorders                      | Large intestine perforation | 0.84666 | Peptic ulcer perforation   | Gastrointestinal disorders                      |

| Basis data for network                                              |                           |         |                                  |                                                                     |
|---------------------------------------------------------------------|---------------------------|---------|----------------------------------|---------------------------------------------------------------------|
| SOC1                                                                | AE1                       | score   | AE2                              | SOC2                                                                |
| Skin and subcutaneous tissue disorders                              | Intertrigo                | 0.84659 | Peritoneal fibrosis              | Gastrointestinal disorders                                          |
| Skin and subcutaneous tissue disorders                              | Intertrigo                | 0.84659 | Respiratory moniliasis           | Infections and infestations                                         |
| Neoplasms benign, malignant and unspecified (incl cysts and polyps) | Melanocytic naevus        | 0.84659 | Pancreatic fistula               | Gastrointestinal disorders                                          |
| Infections and infestations                                         | Respiratory moniliasis    | 0.84659 | Melanocytic naevus               | Neoplasms benign, malignant and unspecified (incl cysts and polyps) |
| Neoplasms benign, malignant and unspecified (incl cysts and polyps) | Melanocytic naevus        | 0.84659 | Peritoneal fibrosis              | Gastrointestinal disorders                                          |
| Gastrointestinal disorders                                          | Pancreatic fistula        | 0.84659 | Intertrigo                       | Skin and subcutaneous tissue disorders                              |
| Endocrine disorders                                                 | Hypercorticism            | 0.84642 | Cataract subcapsular             | Eye disorders                                                       |
| Nervous system disorders                                            | Intracranial aneurysm     | 0.84642 | Alcohol withdrawal syndrome      | Psychiatric disorders                                               |
| Renal and urinary disorders                                         | Renal atrophy             | 0.84634 | Subdural effusion                | Nervous system disorders                                            |
| Renal and urinary disorders                                         | Renal atrophy             | 0.84634 | Cerebral cyst                    | Nervous system disorders                                            |
| Renal and urinary disorders                                         | Renal atrophy             | 0.84634 | Central nervous system infection | Infections and infestations                                         |
| Neoplasms benign, malignant and unspecified (incl cysts and polyps) | Tumour lysis syndrome     | 0.84615 | Cerebral venous thrombosis       | Nervous system disorders                                            |
| Neoplasms benign, malignant and unspecified (incl cysts and polyps) | Astrocytoma               | 0.84602 | Ovarian enlargement              | Reproductive system and breast disorders                            |
| Investigations                                                      | Blood oestrogen decreased | 0.84602 | Astrocytoma                      | Neoplasms benign, malignant and unspecified (incl cysts and polyps) |
| Injury, poisoning and procedural complications                      | Tendon injury             | 0.84595 | Eye inflammation                 | Eye disorders                                                       |
| Eye disorders                                                       | Eye inflammation          | 0.84595 | Chorioretinopathy                | Eye disorders                                                       |
| Eye disorders                                                       | Eye inflammation          | 0.84595 | Nasal mucosa atrophy             | Respiratory, thoracic and mediastinal disorders                     |
| Respiratory, thoracic and mediastinal disorders                     | Laryngeal obstruction     | 0.84595 | Eye inflammation                 | Eye disorders                                                       |
| Investigations                                                      | Blood chromium decreased  | 0.84595 | Eye inflammation                 | Eye disorders                                                       |
| Eye disorders                                                       | Scleromalacia             | 0.84595 | Eye inflammation                 | Eye disorders                                                       |

| Basis data for network                                              |                                               |         |                                               |                                                                     |
|---------------------------------------------------------------------|-----------------------------------------------|---------|-----------------------------------------------|---------------------------------------------------------------------|
| SOC1                                                                | AE1                                           | score   | AE2                                           | SOC2                                                                |
| Eye disorders                                                       | Eye inflammation                              | 0.84595 | Posterior capsule opacification               | Eye disorders                                                       |
| Eye disorders                                                       | Eye inflammation                              | 0.84595 | Scoliosis                                     | Musculoskeletal and connective tissue disorders                     |
| Metabolism and nutrition disorders                                  | Hypercatabolism                               | 0.84583 | Cerebral venous thrombosis                    | Nervous system disorders                                            |
| Eye disorders                                                       | Pupillary disorder                            | 0.84558 | Haptoglobin decreased                         | Investigations                                                      |
| Congenital, familial and genetic disorders                          | Cryptorchism                                  | 0.84558 | Mean cell haemoglobin decreased               | Investigations                                                      |
| Eye disorders                                                       | Pupillary disorder                            | 0.84558 | Supernumerary nipple                          | Congenital, familial and genetic disorders                          |
| Neoplasms benign, malignant and unspecified (incl cysts and polyps) | Lymphoma cutis                                | 0.84558 | Pupillary disorder                            | Eye disorders                                                       |
| Eye disorders                                                       | Extraocular muscle paresis                    | 0.84558 | Lymphoma cutis                                | Neoplasms benign, malignant and unspecified (incl cysts and polyps) |
| Investigations                                                      | Haptoglobin decreased                         | 0.84558 | Mean cell haemoglobin concentration increased | Investigations                                                      |
| Musculoskeletal and connective tissue disorders                     | Senile ankylosing vertebral hyperostosis      | 0.84558 | Pupillary disorder                            | Eye disorders                                                       |
| Skin and subcutaneous tissue disorders                              | Lichenification                               | 0.84558 | Pupillary disorder                            | Eye disorders                                                       |
| Investigations                                                      | Mean cell haemoglobin decreased               | 0.84558 | Haptoglobin increased                         | Investigations                                                      |
| Musculoskeletal and connective tissue disorders                     | Senile ankylosing vertebral hyperostosis      | 0.84558 | Mean cell haemoglobin concentration increased | Investigations                                                      |
| Congenital, familial and genetic disorders                          | Cryptorchism                                  | 0.84558 | PCO2 increased                                | Investigations                                                      |
| Investigations                                                      | Mean cell haemoglobin decreased               | 0.84558 | Supernumerary nipple                          | Congenital, familial and genetic disorders                          |
| Neoplasms benign, malignant and unspecified (incl cysts and polyps) | Lymphoma cutis                                | 0.84558 | Secretion discharge                           | General disorders and administration site conditions                |
| Investigations                                                      | Blood iron increased                          | 0.84558 | Mean cell haemoglobin concentration increased | Investigations                                                      |
| Investigations                                                      | Mean cell haemoglobin concentration increased | 0.84558 | Cryptorchism                                  | Congenital, familial and genetic disorders                          |
| Investigations                                                      | PCO2 increased                                | 0.84558 | Intervertebral disc space narrowing           | Musculoskeletal and connective tissue disorders                     |
| Investigations                                                      | Blood iron increased                          | 0.84558 | Secretion discharge                           | General disorders and administration site conditions                |

| Basis data for network                               |                                          |         |                                               |                                                                     |
|------------------------------------------------------|------------------------------------------|---------|-----------------------------------------------|---------------------------------------------------------------------|
| SOC1                                                 | AE1                                      | score   | AE2                                           | SOC2                                                                |
| Investigations                                       | Haptoglobin decreased                    | 0.84558 | Extraocular muscle paresis                    | Eye disorders                                                       |
| Congenital, familial and genetic disorders           | Cryptorchism                             | 0.84558 | Secretion discharge                           | General disorders and administration site conditions                |
| Musculoskeletal and connective tissue disorders      | Intervertebral disc space narrowing      | 0.84558 | Secretion discharge                           | General disorders and administration site conditions                |
| Eye disorders                                        | Extraocular muscle paresis               | 0.84558 | Cryptorchism                                  | Congenital, familial and genetic disorders                          |
| Investigations                                       | PCO2 increased                           | 0.84558 | Lymphoma cutis                                | Neoplasms benign, malignant and unspecified (incl cysts and polyps) |
| Congenital, familial and genetic disorders           | Supernumerary nipple                     | 0.84558 | Extraocular muscle paresis                    | Eye disorders                                                       |
| Musculoskeletal and connective tissue disorders      | Senile ankylosing vertebral hyperostosis | 0.84558 | Secretion discharge                           | General disorders and administration site conditions                |
| General disorders and administration site conditions | Secretion discharge                      | 0.84558 | Lichenification                               | Skin and subcutaneous tissue disorders                              |
| Investigations                                       | Haptoglobin increased                    | 0.84558 | Mean cell haemoglobin concentration increased | Investigations                                                      |
| Investigations                                       | Mean cell haemoglobin decreased          | 0.84558 | Lymphoma cutis                                | Neoplasms benign, malignant and unspecified (incl cysts and polyps) |
| Investigations                                       | Haptoglobin increased                    | 0.84558 | Pupillary disorder                            | Eye disorders                                                       |
| Investigations                                       | Haptoglobin increased                    | 0.84558 | Extraocular muscle paresis                    | Eye disorders                                                       |
| Eye disorders                                        | Extraocular muscle paresis               | 0.84558 | Senile ankylosing vertebral hyperostosis      | Musculoskeletal and connective tissue disorders                     |
| Eye disorders                                        | Extraocular muscle paresis               | 0.84558 | Lichenification                               | Skin and subcutaneous tissue disorders                              |
| Investigations                                       | Mean cell haemoglobin decreased          | 0.84558 | Blood iron increased                          | Investigations                                                      |
| Investigations                                       | PCO2 increased                           | 0.84558 | Madarosis                                     | Eye disorders                                                       |
| General disorders and administration site conditions | Secretion discharge                      | 0.84558 | Supernumerary nipple                          | Congenital, familial and genetic disorders                          |
| Investigations                                       | Haptoglobin decreased                    | 0.84558 | PCO2 increased                                | Investigations                                                      |
| Investigations                                       | Mean cell haemoglobin decreased          | 0.84558 | Intervertebral disc space narrowing           | Musculoskeletal and connective tissue disorders                     |
| Skin and subcutaneous tissue disorders               | Lichenification                          | 0.84558 | Mean cell haemoglobin concentration increased | Investigations                                                      |

| Basis data for network                          |                                               |         |                                               |                                                                     |
|-------------------------------------------------|-----------------------------------------------|---------|-----------------------------------------------|---------------------------------------------------------------------|
| SOC1                                            | AE1                                           | score   | AE2                                           | SOC2                                                                |
| Eye disorders                                   | Pupillary disorder                            | 0.84558 | Intervertebral disc space narrowing           | Musculoskeletal and connective tissue disorders                     |
| Investigations                                  | Haptoglobin increased                         | 0.84558 | PCO2 increased                                | Investigations                                                      |
| Musculoskeletal and connective tissue disorders | Intervertebral disc space narrowing           | 0.84558 | Extraocular muscle paresis                    | Eye disorders                                                       |
| Investigations                                  | Mean cell haemoglobin concentration increased | 0.84558 | Supernumerary nipple                          | Congenital, familial and genetic disorders                          |
| Congenital, familial and genetic disorders      | Supernumerary nipple                          | 0.84558 | PCO2 increased                                | Investigations                                                      |
| Eye disorders                                   | Madarosis                                     | 0.84558 | Extraocular muscle paresis                    | Eye disorders                                                       |
| Investigations                                  | PCO2 increased                                | 0.84558 | Blood iron increased                          | Investigations                                                      |
| Eye disorders                                   | Madarosis                                     | 0.84558 | Secretion discharge                           | General disorders and administration site conditions                |
| Eye disorders                                   | Pupillary disorder                            | 0.84558 | Madarosis                                     | Eye disorders                                                       |
| Musculoskeletal and connective tissue disorders | Intervertebral disc space narrowing           | 0.84558 | Mean cell haemoglobin concentration increased | Investigations                                                      |
| Musculoskeletal and connective tissue disorders | Senile ankylosing vertebral hyperostosis      | 0.84558 | PCO2 increased                                | Investigations                                                      |
| Skin and subcutaneous tissue disorders          | Lichenification                               | 0.84558 | PCO2 increased                                | Investigations                                                      |
| Investigations                                  | Mean cell haemoglobin concentration increased | 0.84558 | Lymphoma cutis                                | Neoplasms benign, malignant and unspecified (incl cysts and polyps) |
| Investigations                                  | Haptoglobin increased                         | 0.84558 | Secretion discharge                           | General disorders and administration site conditions                |
| Investigations                                  | Mean cell haemoglobin decreased               | 0.84558 | Madarosis                                     | Eye disorders                                                       |
| Investigations                                  | Mean cell haemoglobin concentration increased | 0.84558 | Madarosis                                     | Eye disorders                                                       |
| Eye disorders                                   | Pupillary disorder                            | 0.84558 | Blood iron increased                          | Investigations                                                      |
| Eye disorders                                   | Pupillary disorder                            | 0.84558 | Cryptorchism                                  | Congenital, familial and genetic disorders                          |
| Investigations                                  | Haptoglobin decreased                         | 0.84558 | Mean cell haemoglobin decreased               | Investigations                                                      |
| Musculoskeletal and connective tissue disorders | Senile ankylosing vertebral hyperostosis      | 0.84558 | Mean cell haemoglobin decreased               | Investigations                                                      |

| Basis data for network                                              |                              |         |                                 |                                                                     |
|---------------------------------------------------------------------|------------------------------|---------|---------------------------------|---------------------------------------------------------------------|
| SOC1                                                                | AE1                          | score   | AE2                             | SOC2                                                                |
| Skin and subcutaneous tissue disorders                              | Lichenification              | 0.84558 | Mean cell haemoglobin decreased | Investigations                                                      |
| Eye disorders                                                       | Extraocular muscle paresis   | 0.84558 | Blood iron increased            | Investigations                                                      |
| General disorders and administration site conditions                | Secretion discharge          | 0.84558 | Haptoglobin decreased           | Investigations                                                      |
| Renal and urinary disorders                                         | Ureteric obstruction         | 0.84558 | Tumour flare                    | Neoplasms benign, malignant and unspecified (incl cysts and polyps) |
| Neoplasms benign, malignant and unspecified (incl cysts and polyps) | Tumour flare                 | 0.84558 | Ovarian atrophy                 | Reproductive system and breast disorders                            |
| Neoplasms benign, malignant and unspecified (incl cysts and polyps) | Tumour flare                 | 0.84558 | Scrotal infection               | Infections and infestations                                         |
| Injury, poisoning and procedural complications                      | Scrotal haematoma            | 0.84558 | Tumour flare                    | Neoplasms benign, malignant and unspecified (incl cysts and polyps) |
| Psychiatric disorders                                               | Orgasm abnormal              | 0.84549 | Laryngeal disorder              | Respiratory, thoracic and mediastinal disorders                     |
| Metabolism and nutrition disorders                                  | Body fat disorder            | 0.84543 | Alkalosis hypokalaemic          | Metabolism and nutrition disorders                                  |
| Investigations                                                      | Visual acuity tests abnormal | 0.84539 | Conjunctival bleb               | Eye disorders                                                       |
| Investigations                                                      | Nitrogen balance negative    | 0.84539 | Large intestine perforation     | Gastrointestinal disorders                                          |
| Gastrointestinal disorders                                          | Gastrointestinal ischaemia   | 0.84534 | Tongue injury                   | Injury, poisoning and procedural complications                      |
| Skin and subcutaneous tissue disorders                              | Panniculitis                 | 0.84520 | Nitrogen balance negative       | Investigations                                                      |
| Eye disorders                                                       | Optic neuropathy             | 0.84514 | Hip fracture                    | Injury, poisoning and procedural complications                      |
| Metabolism and nutrition disorders                                  | Zinc deficiency              | 0.84499 | Tongue eruption                 | Gastrointestinal disorders                                          |
| Nervous system disorders                                            | Facial spasm                 | 0.84486 | Cardiac output decreased        | Investigations                                                      |
| Neoplasms benign, malignant and unspecified (incl cysts and polyps) | Genitourinary tract neoplasm | 0.84482 | Virilism foetal                 | Congenital, familial and genetic disorders                          |
| Neoplasms benign, malignant and unspecified (incl cysts and polyps) | Pyogenic granuloma           | 0.84479 | Xanthoma                        | Neoplasms benign, malignant and unspecified (incl cysts and polyps) |
| Nervous system disorders                                            | Cerebral venous thrombosis   | 0.84475 | Hypertrophic cardiomyopathy     | Cardiac disorders                                                   |
| Renal and urinary disorders                                         | Hyperphosphaturia            | 0.84466 | Aminoaciduria                   | Congenital, familial and genetic disorders                          |

| Basis data for network                               |                                            |         |                                 |                                                      |
|------------------------------------------------------|--------------------------------------------|---------|---------------------------------|------------------------------------------------------|
| SOC1                                                 | AE1                                        | score   | AE2                             | SOC2                                                 |
| Metabolism and nutrition disorders                   | Hypercatabolism                            | 0.84465 | Nitrogen balance negative       | Investigations                                       |
| Hepatobiliary disorders                              | Autoimmune hepatitis                       | 0.84439 | Biopsy thyroid gland abnormal   | Investigations                                       |
| Investigations                                       | Electrophoresis abnormal                   | 0.84436 | Anal ulcer                      | Gastrointestinal disorders                           |
| Investigations                                       | Blood electrolytes increased               | 0.84436 | Anal ulcer                      | Gastrointestinal disorders                           |
| Investigations                                       | Haemoglobin                                | 0.84436 | Anal ulcer                      | Gastrointestinal disorders                           |
| Gastrointestinal disorders                           | Anal ulcer                                 | 0.84436 | Drug level increased            | Investigations                                       |
| Investigations                                       | Haematocrit                                | 0.84436 | Anal ulcer                      | Gastrointestinal disorders                           |
| Gastrointestinal disorders                           | Anal ulcer                                 | 0.84436 | Lobar pneumonia                 | Infections and infestations                          |
| Metabolism and nutrition disorders                   | Hypercatabolism                            | 0.84425 | Hip fracture                    | Injury, poisoning and procedural complications       |
| Endocrine disorders                                  | Virilism                                   | 0.84424 | Cushingoid                      | Endocrine disorders                                  |
| Infections and infestations                          | Acute tonsillitis                          | 0.84414 | Gastroenteritis cryptosporidial | Infections and infestations                          |
| Infections and infestations                          | Acute tonsillitis                          | 0.84414 | Pancreatorenal syndrome         | Renal and urinary disorders                          |
| Investigations                                       | High density lipoprotein abnormal          | 0.84414 | Acute tonsillitis               | Infections and infestations                          |
| General disorders and administration site conditions | General symptom                            | 0.84413 | Skin maceration                 | Skin and subcutaneous tissue disorders               |
| Cardiac disorders                                    | Hypertrophic cardiomyopathy                | 0.84412 | Hip fracture                    | Injury, poisoning and procedural complications       |
| General disorders and administration site conditions | Application site photosensitivity reaction | 0.84401 | Sleep terror                    | Psychiatric disorders                                |
| Gastrointestinal disorders                           | Splenic artery aneurysm                    | 0.84394 | Fibrosis                        | General disorders and administration site conditions |
| General disorders and administration site conditions | Fibrosis                                   | 0.84394 | Rectal stenosis                 | Gastrointestinal disorders                           |
| Metabolism and nutrition disorders                   | Hypercatabolism                            | 0.84389 | Cushingoid                      | Endocrine disorders                                  |
| Musculoskeletal and connective tissue disorders      | Osteonecrosis                              | 0.84381 | Cerebral venous thrombosis      | Nervous system disorders                             |

| Basis data for network                                              |                               |         |                           |                                                      |
|---------------------------------------------------------------------|-------------------------------|---------|---------------------------|------------------------------------------------------|
| SOC1                                                                | AE1                           | score   | AE2                       | SOC2                                                 |
| Endocrine disorders                                                 | Cushing's syndrome            | 0.84381 | Skin maceration           | Skin and subcutaneous tissue disorders               |
| Investigations                                                      | Globulins increased           | 0.84379 | Protein total increased   | Investigations                                       |
| Investigations                                                      | Secretion gastric absent      | 0.84372 | Sputum retention          | Respiratory, thoracic and mediastinal disorders      |
| Investigations                                                      | Secretion gastric absent      | 0.84372 | Nasal necrosis            | Respiratory, thoracic and mediastinal disorders      |
| Musculoskeletal and connective tissue disorders                     | Extremity contracture         | 0.84367 | Dressler's syndrome       | Cardiac disorders                                    |
| Gastrointestinal disorders                                          | Proctitis haemorrhagic        | 0.84367 | Extremity contracture     | Musculoskeletal and connective tissue disorders      |
| Investigations                                                      | Pregnancy test false positive | 0.84363 | Injection site abscess    | Infections and infestations                          |
| Reproductive system and breast disorders                            | Vaginal burning sensation     | 0.84360 | Nonspecific reaction      | General disorders and administration site conditions |
| General disorders and administration site conditions                | Bloody discharge              | 0.84360 | Vaginal burning sensation | Reproductive system and breast disorders             |
| Metabolism and nutrition disorders                                  | Catabolic state               | 0.84360 | Peptic ulcer perforation  | Gastrointestinal disorders                           |
| Congenital, familial and genetic disorders                          | Limb reduction defect         | 0.84359 | Ejaculation failure       | Reproductive system and breast disorders             |
| Skin and subcutaneous tissue disorders                              | Fat atrophy                   | 0.84358 | Aortic aneurysm           | Vascular disorders                                   |
| Eye disorders                                                       | Eye inflammation              | 0.84358 | Corneal infection         | Infections and infestations                          |
| Skin and subcutaneous tissue disorders                              | Skin depigmentation           | 0.84353 | Fluid imbalance           | Metabolism and nutrition disorders                   |
| Respiratory, thoracic and mediastinal disorders                     | Asphyxia                      | 0.84353 | Cardiac output decreased  | Investigations                                       |
| Neoplasms benign, malignant and unspecified (incl cysts and polyps) | Papilloma                     | 0.84349 | Poliomyelitis             | Infections and infestations                          |
| Infections and infestations                                         | Poliomyelitis                 | 0.84349 | Diarrhoea infectious      | Infections and infestations                          |
| Gastrointestinal disorders                                          | Painful defaecation           | 0.84349 | Poliomyelitis             | Infections and infestations                          |
| Cardiac disorders                                                   | Hypertrophic cardiomyopathy   | 0.84342 | Hypercoagulation          | Blood and lymphatic system disorders                 |
| Skin and subcutaneous tissue disorders                              | Skin depigmentation           | 0.84339 | Fat atrophy               | Skin and subcutaneous tissue disorders               |



| Basis data for network                                              |                                               |         |                                               |                                                      |
|---------------------------------------------------------------------|-----------------------------------------------|---------|-----------------------------------------------|------------------------------------------------------|
| SOC1                                                                | AE1                                           | score   | AE2                                           | SOC2                                                 |
| Blood and lymphatic system disorders                                | Hypercoagulation                              | 0.84337 | Aortic aneurysm                               | Vascular disorders                                   |
| Investigations                                                      | Nitrogen balance negative                     | 0.84307 | Impaired healing                              | General disorders and administration site conditions |
| Investigations                                                      | Mean cell volume decreased                    | 0.84306 | Secretion discharge                           | General disorders and administration site conditions |
| Investigations                                                      | Mean cell haemoglobin concentration decreased | 0.84306 | Mean cell haemoglobin concentration increased | Investigations                                       |
| Investigations                                                      | PCO2 increased                                | 0.84306 | Mean cell haemoglobin concentration decreased | Investigations                                       |
| Investigations                                                      | Mean cell volume decreased                    | 0.84306 | Mean cell haemoglobin concentration increased | Investigations                                       |
| Investigations                                                      | Mean cell haemoglobin decreased               | 0.84306 | Mean cell haemoglobin concentration decreased | Investigations                                       |
| Investigations                                                      | Mean cell haemoglobin concentration decreased | 0.84306 | Secretion discharge                           | General disorders and administration site conditions |
| Investigations                                                      | Mean cell volume decreased                    | 0.84306 | Extraocular muscle paresis                    | Eye disorders                                        |
| Eye disorders                                                       | Pupillary disorder                            | 0.84306 | Mean cell volume decreased                    | Investigations                                       |
| Eye disorders                                                       | Pupillary disorder                            | 0.84306 | Mean cell haemoglobin concentration decreased | Investigations                                       |
| Eye disorders                                                       | Extraocular muscle paresis                    | 0.84306 | Mean cell haemoglobin concentration decreased | Investigations                                       |
| Investigations                                                      | Mean cell volume decreased                    | 0.84306 | Mean cell haemoglobin decreased               | Investigations                                       |
| Investigations                                                      | Mean cell volume decreased                    | 0.84306 | PCO2 increased                                | Investigations                                       |
| Metabolism and nutrition disorders                                  | Glucose tolerance impaired                    | 0.84304 | Injection site abscess sterile                | General disorders and administration site conditions |
| Renal and urinary disorders                                         | Renal vasculitis                              | 0.84301 | Lipids increased                              | Investigations                                       |
| Neoplasms benign, malignant and unspecified (incl cysts and polyps) | Tumour lysis syndrome                         | 0.84292 | Spinal fracture                               | Injury, poisoning and procedural complications       |
| Skin and subcutaneous tissue disorders                              | Skin fragility                                | 0.84290 | Panniculitis                                  | Skin and subcutaneous tissue disorders               |
| Metabolism and nutrition disorders                                  | Fluid imbalance                               | 0.84283 | Alkalosis hypokalaemic                        | Metabolism and nutrition disorders                   |
| Eye disorders                                                       | Optic neuropathy                              | 0.84282 | Panniculitis                                  | Skin and subcutaneous tissue disorders               |

| Basis data for network                               |                                  |         |                                        |                                                                     |
|------------------------------------------------------|----------------------------------|---------|----------------------------------------|---------------------------------------------------------------------|
| SOC1                                                 | AE1                              | score   | AE2                                    | SOC2                                                                |
| Skin and subcutaneous tissue disorders               | Skin striae                      | 0.84278 | Adrenocortical insufficiency acute     | Endocrine disorders                                                 |
| Nervous system disorders                             | Anosmia                          | 0.84277 | Adrenocortical insufficiency acute     | Endocrine disorders                                                 |
| General disorders and administration site conditions | General symptom                  | 0.84273 | Heat rash                              | Skin and subcutaneous tissue disorders                              |
| General disorders and administration site conditions | Injection site abscess sterile   | 0.84271 | Hypothalamo-pituitary disorders        | Endocrine disorders                                                 |
| Musculoskeletal and connective tissue disorders      | Muscle atrophy                   | 0.84252 | Injection site abscess sterile         | General disorders and administration site conditions                |
| Investigations                                       | Blood growth hormone abnormal    | 0.84249 | Injection site mass                    | General disorders and administration site conditions                |
| Gastrointestinal disorders                           | Rectal polyp                     | 0.84249 | Injection site mass                    | General disorders and administration site conditions                |
| Reproductive system and breast disorders             | Testis discomfort                | 0.84249 | Injection site mass                    | General disorders and administration site conditions                |
| General disorders and administration site conditions | Implant expulsion                | 0.84249 | Injection site mass                    | General disorders and administration site conditions                |
| General disorders and administration site conditions | Injection site mass              | 0.84249 | Pleural rub                            | Respiratory, thoracic and mediastinal disorders                     |
| General disorders and administration site conditions | Injection site mass              | 0.84249 | Throat cancer                          | Neoplasms benign, malignant and unspecified (incl cysts and polyps) |
| Infections and infestations                          | Listeriosis                      | 0.84249 | Injection site mass                    | General disorders and administration site conditions                |
| Injury, poisoning and procedural complications       | Radius fracture                  | 0.84249 | Injection site mass                    | General disorders and administration site conditions                |
| General disorders and administration site conditions | Injection site mass              | 0.84249 | Injection site paraesthesia            | General disorders and administration site conditions                |
| Respiratory, thoracic and mediastinal disorders      | Cough decreased                  | 0.84240 | Blood corticotrophin decreased         | Investigations                                                      |
| Reproductive system and breast disorders             | Breast engorgement               | 0.84230 | Obsessive-compulsive disorder          | Psychiatric disorders                                               |
| Infections and infestations                          | Injection site abscess           | 0.84220 | Facial spasm                           | Nervous system disorders                                            |
| Metabolism and nutrition disorders                   | Fluid imbalance                  | 0.84216 | Secondary adrenocortical insufficiency | Endocrine disorders                                                 |
| Investigations                                       | Mean arterial pressure decreased | 0.84215 | Cutaneous lupus erythematosus          | Skin and subcutaneous tissue disorders                              |
| Investigations                                       | Glucose tolerance test abnormal  | 0.84214 | Pneumonia bacterial                    | Infections and infestations                                         |

| Basis data for network                                              |                                 |         |                                        |                                                                     |
|---------------------------------------------------------------------|---------------------------------|---------|----------------------------------------|---------------------------------------------------------------------|
| SOC1                                                                | AE1                             | score   | AE2                                    | SOC2                                                                |
| Infections and infestations                                         | Pneumonia bacterial             | 0.84214 | Bile duct cancer                       | Neoplasms benign, malignant and unspecified (incl cysts and polyps) |
| Infections and infestations                                         | Pneumonia bacterial             | 0.84214 | Escherichia bacteraemia                | Infections and infestations                                         |
| Investigations                                                      | Bilirubin urine                 | 0.84214 | Pneumonia bacterial                    | Infections and infestations                                         |
| Infections and infestations                                         | Pneumonia bacterial             | 0.84214 | Pseudomonal sepsis                     | Infections and infestations                                         |
| Infections and infestations                                         | Systemic candida                | 0.84214 | Pneumonia bacterial                    | Infections and infestations                                         |
| Infections and infestations                                         | Pneumonia bacterial             | 0.84214 | Disseminated tuberculosis              | Infections and infestations                                         |
| Infections and infestations                                         | Pneumonia bacterial             | 0.84214 | Candida sepsis                         | Infections and infestations                                         |
| Neoplasms benign, malignant and unspecified (incl cysts and polyps) | Metastases to lung              | 0.84214 | Pneumonia bacterial                    | Infections and infestations                                         |
| Infections and infestations                                         | Pneumonia bacterial             | 0.84214 | HIV infection                          | Infections and infestations                                         |
| Neoplasms benign, malignant and unspecified (incl cysts and polyps) | Metastatic neoplasm             | 0.84214 | Pneumonia bacterial                    | Infections and infestations                                         |
| Infections and infestations                                         | Enterococcal bacteraemia        | 0.84214 | Pneumonia bacterial                    | Infections and infestations                                         |
| Infections and infestations                                         | Pneumonia bacterial             | 0.84214 | Infusion related reaction              | General disorders and administration site conditions                |
| Investigations                                                      | Hepatic enzyme                  | 0.84214 | Pneumonia bacterial                    | Infections and infestations                                         |
| Neoplasms benign, malignant and unspecified (incl cysts and polyps) | Adult T-cell lymphoma/leukaemia | 0.84214 | Pneumonia bacterial                    | Infections and infestations                                         |
| Infections and infestations                                         | Pneumonia bacterial             | 0.84214 | Bacterial sepsis                       | Infections and infestations                                         |
| Infections and infestations                                         | Pneumonia bacterial             | 0.84214 | White blood cell count                 | Investigations                                                      |
| Endocrine disorders                                                 | Adrenal suppression             | 0.84210 | Secondary adrenocortical insufficiency | Endocrine disorders                                                 |
| Endocrine disorders                                                 | Cushing's syndrome              | 0.84210 | Growth retardation                     | Musculoskeletal and connective tissue disorders                     |
| Endocrine disorders                                                 | Adrenal suppression             | 0.84201 | Hypercorticism                         | Endocrine disorders                                                 |
| Skin and subcutaneous tissue disorders                              | Skin fragility                  | 0.84198 | Large intestine perforation            | Gastrointestinal disorders                                          |

| Basis data for network                               |                                |         |                                             |                                                                     |
|------------------------------------------------------|--------------------------------|---------|---------------------------------------------|---------------------------------------------------------------------|
| SOC1                                                 | AE1                            | score   | AE2                                         | SOC2                                                                |
| Investigations                                       | Platelet aggregation increased | 0.84191 | Injection site abscess                      | Infections and infestations                                         |
| Musculoskeletal and connective tissue disorders      | Myopathy steroid               | 0.84189 | Body fat disorder                           | Metabolism and nutrition disorders                                  |
| Nervous system disorders                             | Cerebellar artery thrombosis   | 0.84180 | Extremity contracture                       | Musculoskeletal and connective tissue disorders                     |
| Musculoskeletal and connective tissue disorders      | Neuropathic arthropathy        | 0.84178 | Spinal fracture                             | Injury, poisoning and procedural complications                      |
| Investigations                                       | Urine calcium increased        | 0.84166 | Spinal compression fracture                 | Injury, poisoning and procedural complications                      |
| General disorders and administration site conditions | Application site discomfort    | 0.84165 | Microphthalmos                              | Congenital, familial and genetic disorders                          |
| Reproductive system and breast disorders             | Lactation disorder             | 0.84163 | Pregnancy test false positive               | Investigations                                                      |
| Gastrointestinal disorders                           | Gastrointestinal ischaemia     | 0.84159 | Fibrosis                                    | General disorders and administration site conditions                |
| Endocrine disorders                                  | Adrenal suppression            | 0.84158 | Hypopituitarism                             | Endocrine disorders                                                 |
| Musculoskeletal and connective tissue disorders      | Osteonecrosis                  | 0.84155 | Body fat disorder                           | Metabolism and nutrition disorders                                  |
| Respiratory, thoracic and mediastinal disorders      | Pulmonary granuloma            | 0.84142 | Blood thyroid stimulating hormone decreased | Investigations                                                      |
| Infections and infestations                          | Localised infection            | 0.84139 | Application site discharge                  | General disorders and administration site conditions                |
| Injury, poisoning and procedural complications       | Hip fracture                   | 0.84132 | Skin fragility                              | Skin and subcutaneous tissue disorders                              |
| Infections and infestations                          | Injection site abscess         | 0.84130 | Liver function test                         | Investigations                                                      |
| Blood and lymphatic system disorders                 | Hypercoagulation               | 0.84122 | Adrenal suppression                         | Endocrine disorders                                                 |
| Metabolism and nutrition disorders                   | Alkalosis hypokalaemic         | 0.84115 | Urine calcium increased                     | Investigations                                                      |
| Skin and subcutaneous tissue disorders               | Skin atrophy                   | 0.84109 | Growth retardation                          | Musculoskeletal and connective tissue disorders                     |
| Metabolism and nutrition disorders                   | Catabolic state                | 0.84107 | Tumour lysis syndrome                       | Neoplasms benign, malignant and unspecified (incl cysts and polyps) |
| Nervous system disorders                             | Trigeminal neuralgia           | 0.84104 | Arteriospasm coronary                       | Cardiac disorders                                                   |
| Endocrine disorders                                  | Hypercorticism                 | 0.84094 | Scleral thinning                            | Eye disorders                                                       |

| Basis data for network                                              |                                 |         |                                         |                                                 |
|---------------------------------------------------------------------|---------------------------------|---------|-----------------------------------------|-------------------------------------------------|
| SOC1                                                                | AE1                             | score   | AE2                                     | SOC2                                            |
| Investigations                                                      | Nitrogen balance negative       | 0.84086 | Conjunctival bleb                       | Eye disorders                                   |
| Cardiac disorders                                                   | Myocardial rupture              | 0.84084 | Scoliosis                               | Musculoskeletal and connective tissue disorders |
| Cardiac disorders                                                   | Myocardial rupture              | 0.84084 | Nasal mucosa atrophy                    | Respiratory, thoracic and mediastinal disorders |
| Injury, poisoning and procedural complications                      | Tendon injury                   | 0.84084 | Myocardial rupture                      | Cardiac disorders                               |
| Cardiac disorders                                                   | Myocardial rupture              | 0.84084 | Chorioretinopathy                       | Eye disorders                                   |
| Cardiac disorders                                                   | Myocardial rupture              | 0.84084 | Scleromalacia                           | Eye disorders                                   |
| Eye disorders                                                       | Posterior capsule opacification | 0.84084 | Myocardial rupture                      | Cardiac disorders                               |
| Cardiac disorders                                                   | Myocardial rupture              | 0.84084 | Blood chromium decreased                | Investigations                                  |
| Respiratory, thoracic and mediastinal disorders                     | Laryngeal obstruction           | 0.84084 | Myocardial rupture                      | Cardiac disorders                               |
| Metabolism and nutrition disorders                                  | Body fat disorder               | 0.84076 | Dyslipidaemia                           | Metabolism and nutrition disorders              |
| Infections and infestations                                         | Brain abscess                   | 0.84066 | Ovarian enlargement                     | Reproductive system and breast disorders        |
| Investigations                                                      | Blood oestrogen decreased       | 0.84066 | Brain abscess                           | Infections and infestations                     |
| Skin and subcutaneous tissue disorders                              | Leukoderma                      | 0.84058 | Urine calcium increased                 | Investigations                                  |
| Nervous system disorders                                            | Peripheral nerve palsy          | 0.84050 | Cranial nerve disorder                  | Nervous system disorders                        |
| Endocrine disorders                                                 | Virilism                        | 0.84046 | Leukoderma                              | Skin and subcutaneous tissue disorders          |
| Nervous system disorders                                            | Extensor plantar response       | 0.84040 | Dehydroepiandrosterone increased        | Investigations                                  |
| Neoplasms benign, malignant and unspecified (incl cysts and polyps) | Haemangioma of liver            | 0.84032 | Coagulation factor VIII level increased | Investigations                                  |
| Nervous system disorders                                            | Consciousness fluctuating       | 0.84031 | Arterial insufficiency                  | Vascular disorders                              |
| Reproductive system and breast disorders                            | Ejaculation failure             | 0.84023 | Pregnancy test false positive           | Investigations                                  |
| Endocrine disorders                                                 | Virilism                        | 0.84019 | Skin fragility                          | Skin and subcutaneous tissue disorders          |

| Basis data for network                          |                                |         |                             |                                                 |
|-------------------------------------------------|--------------------------------|---------|-----------------------------|-------------------------------------------------|
| SOC1                                            | AE1                            | score   | AE2                         | SOC2                                            |
| Skin and subcutaneous tissue disorders          | Skin striae                    | 0.84014 | Spinal compression fracture | Injury, poisoning and procedural complications  |
| Respiratory, thoracic and mediastinal disorders | Pulmonary granuloma            | 0.84007 | Piloerection                | Skin and subcutaneous tissue disorders          |
| Investigations                                  | Nitrogen balance negative      | 0.84003 | Virilism                    | Endocrine disorders                             |
| Investigations                                  | Nitrogen balance negative      | 0.84003 | Exophthalmos                | Eye disorders                                   |
| Renal and urinary disorders                     | Nephrotic syndrome             | 0.83997 | Renal papillary necrosis    | Renal and urinary disorders                     |
| Vascular disorders                              | Arterial stenosis              | 0.83991 | Tongue injury               | Injury, poisoning and procedural complications  |
| Skin and subcutaneous tissue disorders          | Skin hypopigmentation          | 0.83989 | Cushingoid                  | Endocrine disorders                             |
| Investigations                                  | Platelet aggregation increased | 0.83987 | Asphyxia                    | Respiratory, thoracic and mediastinal disorders |
| Immune system disorders                         | Sarcoidosis                    | 0.83984 | Immunoglobulins decreased   | Investigations                                  |
| Immune system disorders                         | Sarcoidosis                    | 0.83984 | Drug level changed          | Investigations                                  |
| Injury, poisoning and procedural complications  | Compression fracture           | 0.83984 | Sarcoidosis                 | Immune system disorders                         |
| Reproductive system and breast disorders        | Ovarian enlargement            | 0.83982 | Fallot's tetralogy          | Congenital, familial and genetic disorders      |
| Investigations                                  | Blood oestrogen decreased      | 0.83982 | Fallot's tetralogy          | Congenital, familial and genetic disorders      |
| Eye disorders                                   | Hypotony of eye                | 0.83981 | Iris disorder               | Eye disorders                                   |
| Gastrointestinal disorders                      | Rectal ulcer                   | 0.83980 | Carotid artery disease      | Nervous system disorders                        |
| Injury, poisoning and procedural complications  | Spinal compression fracture    | 0.83974 | Fluid imbalance             | Metabolism and nutrition disorders              |
| Metabolism and nutrition disorders              | Body fat disorder              | 0.83952 | Hypercoagulation            | Blood and lymphatic system disorders            |
| Renal and urinary disorders                     | Neonatal anuria                | 0.83948 | Dentofacial anomaly         | Congenital, familial and genetic disorders      |
| Eye disorders                                   | Optic neuropathy               | 0.83948 | Grey syndrome neonatal      | Cardiac disorders                               |
| Cardiac disorders                               | Myocardial rupture             | 0.83945 | Corneal infection           | Infections and infestations                     |

| Basis data for network                               |                                    |         |                                        |                                                 |
|------------------------------------------------------|------------------------------------|---------|----------------------------------------|-------------------------------------------------|
| SOC1                                                 | AE1                                | score   | AE2                                    | SOC2                                            |
| Skin and subcutaneous tissue disorders               | Leukoderma                         | 0.83938 | Secondary adrenocortical insufficiency | Endocrine disorders                             |
| General disorders and administration site conditions | General symptom                    | 0.83931 | Skin striae                            | Skin and subcutaneous tissue disorders          |
| Cardiac disorders                                    | Hypertrophic cardiomyopathy        | 0.83928 | Leukoderma                             | Skin and subcutaneous tissue disorders          |
| Investigations                                       | Liver function test                | 0.83925 | Cardiac output decreased               | Investigations                                  |
| Investigations                                       | Blood growth hormone increased     | 0.83922 | Areflexia                              | Nervous system disorders                        |
| Endocrine disorders                                  | Adrenocortical insufficiency acute | 0.83914 | Muscle atrophy                         | Musculoskeletal and connective tissue disorders |
| Injury, poisoning and procedural complications       | Tendon rupture                     | 0.83912 | Spinal compression fracture            | Injury, poisoning and procedural complications  |
| Gastrointestinal disorders                           | Gastrointestinal motility disorder | 0.83902 | Bladder stenosis                       | Renal and urinary disorders                     |
| Gastrointestinal disorders                           | Gastrointestinal motility disorder | 0.83902 | Bile output decreased                  | Investigations                                  |
| Investigations                                       | Cortisol free urine decreased      | 0.83892 | Tympanic membrane disorder             | Ear and labyrinth disorders                     |
| Investigations                                       | Cortisol free urine decreased      | 0.83892 | Skin chapped                           | Skin and subcutaneous tissue disorders          |
| Congenital, familial and genetic disorders           | Congenital nystagmus               | 0.83889 | Corneal degeneration                   | Eye disorders                                   |
| Endocrine disorders                                  | Cushingoid                         | 0.83886 | Skin striae                            | Skin and subcutaneous tissue disorders          |
| Musculoskeletal and connective tissue disorders      | Myopathy steroid                   | 0.83886 | Fluid imbalance                        | Metabolism and nutrition disorders              |
| Nervous system disorders                             | Areflexia                          | 0.83885 | Limb reduction defect                  | Congenital, familial and genetic disorders      |
| Infections and infestations                          | Empyema                            | 0.83879 | Lung abscess                           | Infections and infestations                     |
| Infections and infestations                          | Empyema                            | 0.83879 | Pulmonary tuberculosis                 | Infections and infestations                     |
| Infections and infestations                          | Empyema                            | 0.83879 | Haemophilus sepsis                     | Infections and infestations                     |
| Eye disorders                                        | Optic neuropathy                   | 0.83876 | Adrenocortical insufficiency acute     | Endocrine disorders                             |
| Eye disorders                                        | Corneal perforation                | 0.83873 | Optic nerve injury                     | Injury, poisoning and procedural complications  |

| Basis data for network                                              |                               |         |                          |                                                 |
|---------------------------------------------------------------------|-------------------------------|---------|--------------------------|-------------------------------------------------|
| SOC1                                                                | AE1                           | score   | AE2                      | SOC2                                            |
| Eye disorders                                                       | Corneal perforation           | 0.83873 | Tuberculosis of eye      | Infections and infestations                     |
| Eye disorders                                                       | Keratitis interstitial        | 0.83873 | Corneal perforation      | Eye disorders                                   |
| Neoplasms benign, malignant and unspecified (incl cysts and polyps) | Tumour lysis syndrome         | 0.83870 | Corneal infection        | Infections and infestations                     |
| Endocrine disorders                                                 | Virilism                      | 0.83864 | Adrenal suppression      | Endocrine disorders                             |
| Infections and infestations                                         | Corneal infection             | 0.83856 | Neuropathic arthropathy  | Musculoskeletal and connective tissue disorders |
| Respiratory, thoracic and mediastinal disorders                     | Laryngeal disorder            | 0.83839 | Injection site abscess   | Infections and infestations                     |
| Skin and subcutaneous tissue disorders                              | Skin depigmentation           | 0.83816 | Skin fragility           | Skin and subcutaneous tissue disorders          |
| Nervous system disorders                                            | Carotid artery disease        | 0.83815 | Mesenteric occlusion     | Gastrointestinal disorders                      |
| Nervous system disorders                                            | Clumsiness                    | 0.83812 | Motor dysfunction        | Nervous system disorders                        |
| Nervous system disorders                                            | Akathisia                     | 0.83807 | Extrapyramidal disorder  | Nervous system disorders                        |
| Endocrine disorders                                                 | Adrenal suppression           | 0.83802 | Growth retardation       | Musculoskeletal and connective tissue disorders |
| Eye disorders                                                       | Pupil fixed                   | 0.83800 | Incoherent               | Nervous system disorders                        |
| Nervous system disorders                                            | Areflexia                     | 0.83799 | Tongue paralysis         | Nervous system disorders                        |
| Infections and infestations                                         | Injection site abscess        | 0.83797 | Limb reduction defect    | Congenital, familial and genetic disorders      |
| Psychiatric disorders                                               | Stereotypic movement disorder | 0.83796 | Cardiac output decreased | Investigations                                  |
| Eye disorders                                                       | Optic neuropathy              | 0.83789 | Leukoderma               | Skin and subcutaneous tissue disorders          |
| Infections and infestations                                         | Corneal infection             | 0.83769 | Growth retardation       | Musculoskeletal and connective tissue disorders |
| Skin and subcutaneous tissue disorders                              | Skin fragility                | 0.83760 | Hypercoagulation         | Blood and lymphatic system disorders            |
| Skin and subcutaneous tissue disorders                              | Skin maceration               | 0.83754 | Cataract subcapsular     | Eye disorders                                   |
| Investigations                                                      | Urine sodium decreased        | 0.83750 | Urine osmolarity         | Investigations                                  |



| Basis data for network                          |                                              |         |                                              |                                                 |
|-------------------------------------------------|----------------------------------------------|---------|----------------------------------------------|-------------------------------------------------|
| SOC1                                            | AE1                                          | score   | AE2                                          | SOC2                                            |
| Investigations                                  | Urine potassium decreased                    | 0.83750 | Glomerular filtration rate                   | Investigations                                  |
| Investigations                                  | Urine sodium decreased                       | 0.83750 | Glomerular filtration rate                   | Investigations                                  |
| Investigations                                  | Urine potassium decreased                    | 0.83750 | Urine osmolality                             | Investigations                                  |
| Cardiac disorders                               | Hypertrophic cardiomyopathy                  | 0.83749 | Adrenal suppression                          | Endocrine disorders                             |
| Investigations                                  | Urine calcium increased                      | 0.83745 | Secondary adrenocortical insufficiency       | Endocrine disorders                             |
| Skin and subcutaneous tissue disorders          | Leukoderma                                   | 0.83744 | Large intestine perforation                  | Gastrointestinal disorders                      |
| Investigations                                  | Cardiac output decreased                     | 0.83743 | Retinal pigmentation                         | Eye disorders                                   |
| Reproductive system and breast disorders        | Breast engorgement                           | 0.83741 | Acute respiratory failure                    | Respiratory, thoracic and mediastinal disorders |
| Reproductive system and breast disorders        | Ovarian failure                              | 0.83735 | Blood follicle stimulating hormone increased | Investigations                                  |
| Musculoskeletal and connective tissue disorders | Myopathy steroid                             | 0.83727 | Urine calcium increased                      | Investigations                                  |
| Gastrointestinal disorders                      | Aptyalism                                    | 0.83725 | Tardive dyskinesia                           | Nervous system disorders                        |
| Eye disorders                                   | Ocular myasthenia                            | 0.83724 | Gastroenteritis staphylococcal               | Infections and infestations                     |
| Congenital, familial and genetic disorders      | Glucose-6-phosphate dehydrogenase deficiency | 0.83724 | Gastroenteritis staphylococcal               | Infections and infestations                     |
| Metabolism and nutrition disorders              | Vitamin B complex deficiency                 | 0.83724 | Gastroenteritis staphylococcal               | Infections and infestations                     |
| Skin and subcutaneous tissue disorders          | Skin depigmentation                          | 0.83715 | Hypercoagulation                             | Blood and lymphatic system disorders            |
| Nervous system disorders                        | Peripheral nerve palsy                       | 0.83712 | Dermatomyositis                              | Skin and subcutaneous tissue disorders          |
| Eye disorders                                   | Exophthalmos                                 | 0.83706 | Cushingoid                                   | Endocrine disorders                             |
| Cardiac disorders                               | Myocardial rupture                           | 0.83704 | Catabolic state                              | Metabolism and nutrition disorders              |
| Gastrointestinal disorders                      | Large intestine perforation                  | 0.83701 | Hip fracture                                 | Injury, poisoning and procedural complications  |
| Investigations                                  | Foetal heart rate abnormal                   | 0.83688 | Bile duct pressure increased                 | Investigations                                  |

| Basis data for network                          |                                               |         |                                 |                                                                     |
|-------------------------------------------------|-----------------------------------------------|---------|---------------------------------|---------------------------------------------------------------------|
| SOC1                                            | AE1                                           | score   | AE2                             | SOC2                                                                |
| Metabolism and nutrition disorders              | Glucose tolerance impaired                    | 0.83688 | Nitrogen balance negative       | Investigations                                                      |
| Eye disorders                                   | Growth of eyelashes                           | 0.83684 | Exostosis                       | Musculoskeletal and connective tissue disorders                     |
| Musculoskeletal and connective tissue disorders | Exostosis                                     | 0.83684 | Uterine rupture                 | Injury, poisoning and procedural complications                      |
| Musculoskeletal and connective tissue disorders | Exostosis                                     | 0.83684 | Uterine cervical laceration     | Reproductive system and breast disorders                            |
| Musculoskeletal and connective tissue disorders | Muscle atrophy                                | 0.83678 | Skin fragility                  | Skin and subcutaneous tissue disorders                              |
| Skin and subcutaneous tissue disorders          | Skin striae                                   | 0.83676 | Fat atrophy                     | Skin and subcutaneous tissue disorders                              |
| Investigations                                  | Blood 1,25-dihydroxycholecalciferol increased | 0.83675 | Anastomotic ulcer               | Injury, poisoning and procedural complications                      |
| Hepatobiliary disorders                         | Gallbladder pain                              | 0.83675 | Osteocalcin decreased           | Investigations                                                      |
| Investigations                                  | Blood 1,25-dihydroxycholecalciferol increased | 0.83675 | Gallbladder pain                | Hepatobiliary disorders                                             |
| Investigations                                  | Osteocalcin decreased                         | 0.83675 | Anastomotic ulcer               | Injury, poisoning and procedural complications                      |
| Respiratory, thoracic and mediastinal disorders | Cough decreased                               | 0.83674 | Piloerection                    | Skin and subcutaneous tissue disorders                              |
| Skin and subcutaneous tissue disorders          | Leukoderma                                    | 0.83662 | Glucose tolerance impaired      | Metabolism and nutrition disorders                                  |
| Musculoskeletal and connective tissue disorders | Myopathy steroid                              | 0.83657 | Skin atrophy                    | Skin and subcutaneous tissue disorders                              |
| Skin and subcutaneous tissue disorders          | Skin fragility                                | 0.83655 | Cerebral venous thrombosis      | Nervous system disorders                                            |
| Endocrine disorders                             | Hypercorticism                                | 0.83644 | Oropharyngeal candidiasis       | Infections and infestations                                         |
| Reproductive system and breast disorders        | Ejaculation failure                           | 0.83630 | Aspiration                      | Respiratory, thoracic and mediastinal disorders                     |
| Endocrine disorders                             | Hypopituitarism                               | 0.83629 | Hypothalamo-pituitary disorders | Endocrine disorders                                                 |
| Metabolism and nutrition disorders              | Hypervitaminosis A                            | 0.83622 | Pyogenic granuloma              | Neoplasms benign, malignant and unspecified (incl cysts and polyps) |
| Endocrine disorders                             | Adrenocortical insufficiency acute            | 0.83611 | Gastroduodenal ulcer            | Gastrointestinal disorders                                          |
| Investigations                                  | Oestradiol decreased                          | 0.83606 | Injection site ulcer            | General disorders and administration site conditions                |

| Basis data for network                          |                                 |         |                                        |                                                                     |
|-------------------------------------------------|---------------------------------|---------|----------------------------------------|---------------------------------------------------------------------|
| SOC1                                            | AE1                             | score   | AE2                                    | SOC2                                                                |
| Metabolism and nutrition disorders              | Body fat disorder               | 0.83591 | Secondary adrenocortical insufficiency | Endocrine disorders                                                 |
| Infections and infestations                     | Blastomycosis                   | 0.83576 | Ephelides                              | Skin and subcutaneous tissue disorders                              |
| Skin and subcutaneous tissue disorders          | Ephelides                       | 0.83576 | Pneumonia klebsiella                   | Infections and infestations                                         |
| Skin and subcutaneous tissue disorders          | Ephelides                       | 0.83576 | Leukaemia cutis                        | Neoplasms benign, malignant and unspecified (incl cysts and polyps) |
| Immune system disorders                         | Immunosuppression               | 0.83574 | Blood chromium decreased               | Investigations                                                      |
| Eye disorders                                   | Posterior capsule opacification | 0.83574 | Immunosuppression                      | Immune system disorders                                             |
| Immune system disorders                         | Immunosuppression               | 0.83574 | Chorioretinopathy                      | Eye disorders                                                       |
| Eye disorders                                   | Scleromalacia                   | 0.83574 | Immunosuppression                      | Immune system disorders                                             |
| Respiratory, thoracic and mediastinal disorders | Laryngeal obstruction           | 0.83574 | Immunosuppression                      | Immune system disorders                                             |
| Injury, poisoning and procedural complications  | Tendon injury                   | 0.83574 | Immunosuppression                      | Immune system disorders                                             |
| Immune system disorders                         | Immunosuppression               | 0.83574 | Scoliosis                              | Musculoskeletal and connective tissue disorders                     |
| Immune system disorders                         | Immunosuppression               | 0.83574 | Nasal mucosa atrophy                   | Respiratory, thoracic and mediastinal disorders                     |
| Reproductive system and breast disorders        | Erection increased              | 0.83557 | Virilism foetal                        | Congenital, familial and genetic disorders                          |
| Pregnancy, puerperium and perinatal conditions  | Foetal distress syndrome        | 0.83556 | Delayed delivery                       | Pregnancy, puerperium and perinatal conditions                      |
| Pregnancy, puerperium and perinatal conditions  | Antepartum haemorrhage          | 0.83556 | Foetal distress syndrome               | Pregnancy, puerperium and perinatal conditions                      |
| Pregnancy, puerperium and perinatal conditions  | Foetal distress syndrome        | 0.83556 | Labour complication                    | Pregnancy, puerperium and perinatal conditions                      |
| Investigations                                  | Cardiac output decreased        | 0.83554 | Blood growth hormone increased         | Investigations                                                      |
| Nervous system disorders                        | Anosmia                         | 0.83554 | Corneal infection                      | Infections and infestations                                         |
| Nervous system disorders                        | Incoherent                      | 0.83549 | Fear                                   | Psychiatric disorders                                               |
| Infections and infestations                     | Pelvic abscess                  | 0.83549 | Metamyelocyte count increased          | Investigations                                                      |

| Basis data for network                          |                                 |         |                                  |                                                      |
|-------------------------------------------------|---------------------------------|---------|----------------------------------|------------------------------------------------------|
| SOC1                                            | AE1                             | score   | AE2                              | SOC2                                                 |
| Investigations                                  | Metamyelocyte count increased   | 0.83549 | Neutrophil percentage increased  | Investigations                                       |
| Investigations                                  | Metamyelocyte count increased   | 0.83549 | Abdominal abscess                | Infections and infestations                          |
| Infections and infestations                     | Injection site pustule          | 0.83549 | Metamyelocyte count increased    | Investigations                                       |
| Investigations                                  | Metamyelocyte count increased   | 0.83549 | Subdural haemorrhage             | Injury, poisoning and procedural complications       |
| Investigations                                  | Metamyelocyte count increased   | 0.83549 | Infusion site warmth             | General disorders and administration site conditions |
| Investigations                                  | Metamyelocyte count increased   | 0.83549 | Myelocyte count increased        | Investigations                                       |
| Investigations                                  | Metamyelocyte count increased   | 0.83549 | Fungal rash                      | Infections and infestations                          |
| Investigations                                  | Neutrophil percentage decreased | 0.83549 | Metamyelocyte count increased    | Investigations                                       |
| Musculoskeletal and connective tissue disorders | Growth retardation              | 0.83547 | Glucose tolerance impaired       | Metabolism and nutrition disorders                   |
| Investigations                                  | Bile duct pressure increased    | 0.83545 | Bile output decreased            | Investigations                                       |
| Investigations                                  | Bile duct pressure increased    | 0.83545 | Bladder stenosis                 | Renal and urinary disorders                          |
| Investigations                                  | Blood growth hormone increased  | 0.83542 | Ejaculation failure              | Reproductive system and breast disorders             |
| Cardiac disorders                               | Right ventricular failure       | 0.83541 | Haemorrhagic cerebral infarction | Nervous system disorders                             |
| Skin and subcutaneous tissue disorders          | Fat atrophy                     | 0.83537 | Skin atrophy                     | Skin and subcutaneous tissue disorders               |
| Ear and labyrinth disorders                     | Deafness permanent              | 0.83530 | Carotene decreased               | Investigations                                       |
| Metabolism and nutrition disorders              | Glucose tolerance impaired      | 0.83521 | Cerebral venous thrombosis       | Nervous system disorders                             |
| Skin and subcutaneous tissue disorders          | Skin atrophy                    | 0.83505 | Alkalosis hypokalaemic           | Metabolism and nutrition disorders                   |
| Infections and infestations                     | Amoebiasis                      | 0.83500 | Menopausal disorder              | Reproductive system and breast disorders             |
| Infections and infestations                     | Nocardiosis                     | 0.83500 | Menopausal disorder              | Reproductive system and breast disorders             |
| Reproductive system and breast disorders        | Menopausal disorder             | 0.83500 | Anorexia nervosa                 | Psychiatric disorders                                |

| Basis data for network                          |                                    |         |                                           |                                                      |
|-------------------------------------------------|------------------------------------|---------|-------------------------------------------|------------------------------------------------------|
| SOC1                                            | AE1                                | score   | AE2                                       | SOC2                                                 |
| Eye disorders                                   | Retinal pigmentation               | 0.83499 | Injection site abscess                    | Infections and infestations                          |
| Hepatobiliary disorders                         | Autoimmune hepatitis               | 0.83485 | Hyperphosphaturia                         | Renal and urinary disorders                          |
| Investigations                                  | Urine osmolality                   | 0.83482 | Blood pH decreased                        | Investigations                                       |
| Investigations                                  | Glomerular filtration rate         | 0.83482 | Blood pH decreased                        | Investigations                                       |
| Respiratory, thoracic and mediastinal disorders | Paranasal sinus hypersecretion     | 0.83482 | Scratch                                   | Injury, poisoning and procedural complications       |
| Injury, poisoning and procedural complications  | Self mutilation                    | 0.83482 | Paranasal sinus hypersecretion            | Respiratory, thoracic and mediastinal disorders      |
| Respiratory, thoracic and mediastinal disorders | Paranasal sinus hypersecretion     | 0.83482 | Glycosylated haemoglobin decreased        | Investigations                                       |
| Respiratory, thoracic and mediastinal disorders | Paranasal sinus hypersecretion     | 0.83482 | Intention tremor                          | Nervous system disorders                             |
| Nervous system disorders                        | Mastication disorder               | 0.83482 | Paranasal sinus hypersecretion            | Respiratory, thoracic and mediastinal disorders      |
| Reproductive system and breast disorders        | Spontaneous penile erection        | 0.83482 | Paranasal sinus hypersecretion            | Respiratory, thoracic and mediastinal disorders      |
| Respiratory, thoracic and mediastinal disorders | Paranasal sinus hypersecretion     | 0.83482 | Parkinsonian rest tremor                  | Nervous system disorders                             |
| Musculoskeletal and connective tissue disorders | Buttock pain                       | 0.83482 | Paranasal sinus hypersecretion            | Respiratory, thoracic and mediastinal disorders      |
| Respiratory, thoracic and mediastinal disorders | Paranasal sinus hypersecretion     | 0.83482 | Dizziness exertional                      | Nervous system disorders                             |
| Investigations                                  | Glycosylated haemoglobin increased | 0.83482 | Paranasal sinus hypersecretion            | Respiratory, thoracic and mediastinal disorders      |
| Respiratory, thoracic and mediastinal disorders | Paranasal sinus hypersecretion     | 0.83482 | Coccydynia                                | Musculoskeletal and connective tissue disorders      |
| Respiratory, thoracic and mediastinal disorders | Paranasal sinus hypersecretion     | 0.83482 | Blood creatine phosphokinase MB increased | Investigations                                       |
| Psychiatric disorders                           | Blunted affect                     | 0.83482 | Paranasal sinus hypersecretion            | Respiratory, thoracic and mediastinal disorders      |
| Respiratory, thoracic and mediastinal disorders | Paranasal sinus hypersecretion     | 0.83482 | Abasia                                    | General disorders and administration site conditions |
| Psychiatric disorders                           | Flat affect                        | 0.83482 | Paranasal sinus hypersecretion            | Respiratory, thoracic and mediastinal disorders      |
| Respiratory, thoracic and mediastinal disorders | Paranasal sinus hypersecretion     | 0.83482 | Hallucination, tactile                    | Psychiatric disorders                                |

| Basis data for network                          |                                |         |                                       |                                                                     |
|-------------------------------------------------|--------------------------------|---------|---------------------------------------|---------------------------------------------------------------------|
| SOC1                                            | AE1                            | score   | AE2                                   | SOC2                                                                |
| Psychiatric disorders                           | Suspiciousness                 | 0.83482 | Paranasal sinus hypersecretion        | Respiratory, thoracic and mediastinal disorders                     |
| Respiratory, thoracic and mediastinal disorders | Paranasal sinus hypersecretion | 0.83482 | Periorbital haematoma                 | Injury, poisoning and procedural complications                      |
| Respiratory, thoracic and mediastinal disorders | Paranasal sinus hypersecretion | 0.83482 | Mendelson's syndrome                  | Respiratory, thoracic and mediastinal disorders                     |
| Respiratory, thoracic and mediastinal disorders | Paranasal sinus hypersecretion | 0.83482 | Diet refusal                          | Metabolism and nutrition disorders                                  |
| Cardiac disorders                               | Hypertrophic cardiomyopathy    | 0.83476 | Large intestine perforation           | Gastrointestinal disorders                                          |
| Blood and lymphatic system disorders            | Hypercoagulation               | 0.83476 | Large intestine perforation           | Gastrointestinal disorders                                          |
| Eye disorders                                   | Scleral thinning               | 0.83470 | Menopausal disorder                   | Reproductive system and breast disorders                            |
| Metabolism and nutrition disorders              | Catabolic state                | 0.83469 | Eye inflammation                      | Eye disorders                                                       |
| Endocrine disorders                             | Adrenal suppression            | 0.83467 | Skin maceration                       | Skin and subcutaneous tissue disorders                              |
| Metabolism and nutrition disorders              | Hypermagnesaemia               | 0.83453 | Enterococcal infection                | Infections and infestations                                         |
| Eye disorders                                   | Conjunctival bleb              | 0.83449 | Hypercatabolism                       | Metabolism and nutrition disorders                                  |
| Injury, poisoning and procedural complications  | Spinal fracture                | 0.83441 | Immunosuppression                     | Immune system disorders                                             |
| Nervous system disorders                        | Global amnesia                 | 0.83436 | Arteriospasm coronary                 | Cardiac disorders                                                   |
| Endocrine disorders                             | Hypercorticism                 | 0.83433 | Adrenocortical insufficiency acute    | Endocrine disorders                                                 |
| Gastrointestinal disorders                      | Gastroduodenal ulcer           | 0.83413 | Grey syndrome neonatal                | Cardiac disorders                                                   |
| Nervous system disorders                        | Motor dysfunction              | 0.83404 | Phobia of driving                     | Psychiatric disorders                                               |
| Investigations                                  | Urine calcium increased        | 0.83393 | Hypopituitarism                       | Endocrine disorders                                                 |
| Investigations                                  | Urine chloride decreased       | 0.83388 | Retinopathy of prematurity            | Eye disorders                                                       |
| Renal and urinary disorders                     | Ureteral spasm                 | 0.83380 | Bile duct pressure increased          | Investigations                                                      |
| Eye disorders                                   | Retinal vascular thrombosis    | 0.83377 | Adenosquamous carcinoma of the cervix | Neoplasms benign, malignant and unspecified (incl cysts and polyps) |

| Basis data for network                          |                                       |         |                                        |                                                                     |
|-------------------------------------------------|---------------------------------------|---------|----------------------------------------|---------------------------------------------------------------------|
| SOC1                                            | AE1                                   | score   | AE2                                    | SOC2                                                                |
| Eye disorders                                   | Retinal vascular thrombosis           | 0.83377 | Ceruloplasmin increased                | Investigations                                                      |
| Reproductive system and breast disorders        | Breast cyst                           | 0.83377 | Retinal vascular thrombosis            | Eye disorders                                                       |
| Investigations                                  | Coagulation factor IX level increased | 0.83377 | Retinal vascular thrombosis            | Eye disorders                                                       |
| Eye disorders                                   | Retinal vascular thrombosis           | 0.83377 | Testis cancer                          | Neoplasms benign, malignant and unspecified (incl cysts and polyps) |
| Investigations                                  | Alpha-1 anti-trypsin increased        | 0.83377 | Retinal vascular thrombosis            | Eye disorders                                                       |
| Eye disorders                                   | Retinal vascular thrombosis           | 0.83377 | Coagulation factor VII level increased | Investigations                                                      |
| Eye disorders                                   | Retinal vascular thrombosis           | 0.83377 | Plasminogen increased                  | Investigations                                                      |
| Eye disorders                                   | Retinal vascular thrombosis           | 0.83377 | Colorectal cancer                      | Neoplasms benign, malignant and unspecified (incl cysts and polyps) |
| Eye disorders                                   | Retinal vascular thrombosis           | 0.83377 | Coagulation factor X level increased   | Investigations                                                      |
| Eye disorders                                   | Retinal vascular thrombosis           | 0.83377 | Coagulation factor XII level increased | Investigations                                                      |
| Eye disorders                                   | Retinal vascular thrombosis           | 0.83377 | Vaginal cancer                         | Neoplasms benign, malignant and unspecified (incl cysts and polyps) |
| Reproductive system and breast disorders        | Breast engorgement                    | 0.83373 | Asphyxia                               | Respiratory, thoracic and mediastinal disorders                     |
| Cardiac disorders                               | Grey syndrome neonatal                | 0.83370 | Tumour lysis syndrome                  | Neoplasms benign, malignant and unspecified (incl cysts and polyps) |
| Vascular disorders                              | Aortic aneurysm                       | 0.83369 | Urine calcium increased                | Investigations                                                      |
| Investigations                                  | Urine calcium increased               | 0.83367 | Body fat disorder                      | Metabolism and nutrition disorders                                  |
| Endocrine disorders                             | Adrenal suppression                   | 0.83362 | Skin fragility                         | Skin and subcutaneous tissue disorders                              |
| Investigations                                  | LE cells present                      | 0.83359 | Coombs positive haemolytic anaemia     | Blood and lymphatic system disorders                                |
| Gastrointestinal disorders                      | Peptic ulcer perforation              | 0.83353 | Hypertrophic cardiomyopathy            | Cardiac disorders                                                   |
| Metabolism and nutrition disorders              | Glucose tolerance impaired            | 0.83351 | Hypercatabolism                        | Metabolism and nutrition disorders                                  |
| Respiratory, thoracic and mediastinal disorders | Neonatal tachypnoea                   | 0.83350 | Foetal distress syndrome               | Pregnancy, puerperium and perinatal conditions                      |

| Basis data for network                                              |                                         |         |                                     |                                                                     |
|---------------------------------------------------------------------|-----------------------------------------|---------|-------------------------------------|---------------------------------------------------------------------|
| SOC1                                                                | AE1                                     | score   | AE2                                 | SOC2                                                                |
| Gastrointestinal disorders                                          | Vomiting neonatal                       | 0.83350 | Foetal distress syndrome            | Pregnancy, puerperium and perinatal conditions                      |
| Pregnancy, puerperium and perinatal conditions                      | Foetal distress syndrome                | 0.83350 | Neonatal infection                  | Infections and infestations                                         |
| General disorders and administration site conditions                | Fever neonatal                          | 0.83350 | Foetal distress syndrome            | Pregnancy, puerperium and perinatal conditions                      |
| Infections and infestations                                         | Neonatal pneumonia                      | 0.83350 | Foetal distress syndrome            | Pregnancy, puerperium and perinatal conditions                      |
| Musculoskeletal and connective tissue disorders                     | Myopathy steroid                        | 0.83350 | Skin hypopigmentation               | Skin and subcutaneous tissue disorders                              |
| Infections and infestations                                         | Viral upper respiratory tract infection | 0.83335 | Cortisol free urine decreased       | Investigations                                                      |
| Investigations                                                      | Cortisol free urine decreased           | 0.83335 | Oral fungal infection               | Infections and infestations                                         |
| Investigations                                                      | Cortisol free urine decreased           | 0.83335 | Osteitis deformans                  | Musculoskeletal and connective tissue disorders                     |
| Investigations                                                      | Cortisol free urine decreased           | 0.83335 | Bradycardia neonatal                | Cardiac disorders                                                   |
| Congenital, familial and genetic disorders                          | Pierre Robin syndrome                   | 0.83335 | Cortisol free urine decreased       | Investigations                                                      |
| Gastrointestinal disorders                                          | Large intestine perforation             | 0.83333 | Injection site abscess sterile      | General disorders and administration site conditions                |
| Neoplasms benign, malignant and unspecified (incl cysts and polyps) | Adenosquamous carcinoma of the cervix   | 0.83330 | Thyroxin binding globulin increased | Investigations                                                      |
| Investigations                                                      | Thyroxin binding globulin increased     | 0.83330 | Alpha-1 anti-trypsin increased      | Investigations                                                      |
| Investigations                                                      | Coagulation factor VII level increased  | 0.83330 | Thyroxin binding globulin increased | Investigations                                                      |
| Investigations                                                      | Thyroxin binding globulin increased     | 0.83330 | Vaginal cancer                      | Neoplasms benign, malignant and unspecified (incl cysts and polyps) |
| Neoplasms benign, malignant and unspecified (incl cysts and polyps) | Testis cancer                           | 0.83330 | Thyroxin binding globulin increased | Investigations                                                      |
| Investigations                                                      | Coagulation factor X level increased    | 0.83330 | Thyroxin binding globulin increased | Investigations                                                      |
| Investigations                                                      | Thyroxin binding globulin increased     | 0.83330 | Colorectal cancer                   | Neoplasms benign, malignant and unspecified (incl cysts and polyps) |
| Investigations                                                      | Coagulation factor IX level increased   | 0.83330 | Thyroxin binding globulin increased | Investigations                                                      |
| Investigations                                                      | Thyroxin binding globulin increased     | 0.83330 | Ceruloplasmin increased             | Investigations                                                      |



| Basis data for network                          |                                      |         |                                        |                                                 |
|-------------------------------------------------|--------------------------------------|---------|----------------------------------------|-------------------------------------------------|
| SOC1                                            | AE1                                  | score   | AE2                                    | SOC2                                            |
| Reproductive system and breast disorders        | Breast cyst                          | 0.83330 | Thyroxin binding globulin increased    | Investigations                                  |
| Investigations                                  | Thyroxin binding globulin increased  | 0.83330 | Plasminogen increased                  | Investigations                                  |
| Investigations                                  | Thyroxin binding globulin increased  | 0.83330 | Coagulation factor XII level increased | Investigations                                  |
| Infections and infestations                     | Oropharyngeal candidiasis            | 0.83318 | Nasal candidiasis                      | Infections and infestations                     |
| Injury, poisoning and procedural complications  | Spinal fracture                      | 0.83315 | Growth retardation                     | Musculoskeletal and connective tissue disorders |
| Respiratory, thoracic and mediastinal disorders | Wegener's granulomatosis             | 0.83312 | Retinoic acid syndrome                 | Respiratory, thoracic and mediastinal disorders |
| Congenital, familial and genetic disorders      | Thymus hypoplasia                    | 0.83312 | Wegener's granulomatosis               | Respiratory, thoracic and mediastinal disorders |
| Respiratory, thoracic and mediastinal disorders | Wegener's granulomatosis             | 0.83312 | Optic nerve hypoplasia                 | Congenital, familial and genetic disorders      |
| Respiratory, thoracic and mediastinal disorders | Wegener's granulomatosis             | 0.83312 | White blood cells urine                | Investigations                                  |
| Respiratory, thoracic and mediastinal disorders | Wegener's granulomatosis             | 0.83312 | Asthma exercise induced                | Respiratory, thoracic and mediastinal disorders |
| Respiratory, thoracic and mediastinal disorders | Wegener's granulomatosis             | 0.83312 | Acne fulminans                         | Skin and subcutaneous tissue disorders          |
| Respiratory, thoracic and mediastinal disorders | Wegener's granulomatosis             | 0.83312 | Congenital great vessel anomaly        | Congenital, familial and genetic disorders      |
| Respiratory, thoracic and mediastinal disorders | Lower respiratory tract inflammation | 0.83312 | Wegener's granulomatosis               | Respiratory, thoracic and mediastinal disorders |
| Respiratory, thoracic and mediastinal disorders | Wegener's granulomatosis             | 0.83312 | Tendon calcification                   | Musculoskeletal and connective tissue disorders |
| Respiratory, thoracic and mediastinal disorders | Wegener's granulomatosis             | 0.83312 | Scrotal ulcer                          | Reproductive system and breast disorders        |
| Congenital, familial and genetic disorders      | Hypertelorism of orbit               | 0.83312 | Wegener's granulomatosis               | Respiratory, thoracic and mediastinal disorders |
| Musculoskeletal and connective tissue disorders | Exostosis                            | 0.83310 | Iris hyperpigmentation                 | Eye disorders                                   |
| Gastrointestinal disorders                      | Tooth erosion                        | 0.83302 | Vascular test abnormal                 | Investigations                                  |
| Investigations                                  | Ultrasound kidney abnormal           | 0.83297 | Eczema asteatotic                      | Skin and subcutaneous tissue disorders          |
| Skin and subcutaneous tissue disorders          | Eczema asteatotic                    | 0.83297 | Urinary sediment abnormal              | Investigations                                  |

| Basis data for network                          |                                 |         |                                     |                                                 |
|-------------------------------------------------|---------------------------------|---------|-------------------------------------|-------------------------------------------------|
| SOC1                                            | AE1                             | score   | AE2                                 | SOC2                                            |
| Skin and subcutaneous tissue disorders          | Eczema asteatotic               | 0.83297 | Lipomatosis                         | Metabolism and nutrition disorders              |
| Musculoskeletal and connective tissue disorders | Muscle fibrosis                 | 0.83294 | Blepharospasm                       | Eye disorders                                   |
| Reproductive system and breast disorders        | Female sexual arousal disorder  | 0.83292 | Vascular calcification              | Vascular disorders                              |
| Reproductive system and breast disorders        | Female sexual arousal disorder  | 0.83292 | Mediastinal cyst                    | Respiratory, thoracic and mediastinal disorders |
| Renal and urinary disorders                     | Renal vasculitis                | 0.83282 | Hypercalciuria                      | Renal and urinary disorders                     |
| Investigations                                  | Nitrogen balance negative       | 0.83274 | Muscle atrophy                      | Musculoskeletal and connective tissue disorders |
| Nervous system disorders                        | Locked-in syndrome              | 0.83264 | Blood pH abnormal                   | Investigations                                  |
| Investigations                                  | Blood pH abnormal               | 0.83264 | Microangiopathy                     | Vascular disorders                              |
| Renal and urinary disorders                     | Urge incontinence               | 0.83264 | Blood pH abnormal                   | Investigations                                  |
| Gastrointestinal disorders                      | Pancreatic pseudocyst           | 0.83264 | Blood pH abnormal                   | Investigations                                  |
| Investigations                                  | Blood pH abnormal               | 0.83264 | Cardiomyopathy neonatal             | Cardiac disorders                               |
| Renal and urinary disorders                     | Glomerular vascular disorder    | 0.83264 | Blood pH abnormal                   | Investigations                                  |
| Investigations                                  | Blood pH abnormal               | 0.83264 | Bullous impetigo                    | Infections and infestations                     |
| Investigations                                  | Blood pH abnormal               | 0.83264 | Gastroesophagitis                   | Gastrointestinal disorders                      |
| Investigations                                  | Blood pH abnormal               | 0.83264 | Brain hypoxia                       | Respiratory, thoracic and mediastinal disorders |
| Investigations                                  | Blood pH abnormal               | 0.83264 | Diabetes mellitus insulin-dependent | Metabolism and nutrition disorders              |
| Investigations                                  | Blood pH abnormal               | 0.83264 | Arteriopathic disease               | Vascular disorders                              |
| Investigations                                  | Blood pH abnormal               | 0.83264 | Monoparesis                         | Nervous system disorders                        |
| Infections and infestations                     | Epstein-Barr virus infection    | 0.83264 | Blood pH abnormal                   | Investigations                                  |
| Endocrine disorders                             | Hypothalamo-pituitary disorders | 0.83260 | Glucose urine present               | Investigations                                  |

| Basis data for network                          |                                 |         |                               |                                                      |
|-------------------------------------------------|---------------------------------|---------|-------------------------------|------------------------------------------------------|
| SOC1                                            | AE1                             | score   | AE2                           | SOC2                                                 |
| Eye disorders                                   | Corneal perforation             | 0.83259 | Scleral thinning              | Eye disorders                                        |
| Respiratory, thoracic and mediastinal disorders | Aspiration                      | 0.83258 | Orgasm abnormal               | Psychiatric disorders                                |
| Endocrine disorders                             | Hypothalamo-pituitary disorders | 0.83256 | Growth retardation            | Musculoskeletal and connective tissue disorders      |
| Nervous system disorders                        | Cerebral venous thrombosis      | 0.83253 | Nitrogen balance negative     | Investigations                                       |
| Gastrointestinal disorders                      | Lip blister                     | 0.83244 | Hepatitis B                   | Infections and infestations                          |
| Gastrointestinal disorders                      | Intestinal mass                 | 0.83244 | Hepatitis B                   | Infections and infestations                          |
| Infections and infestations                     | Hepatitis B                     | 0.83244 | Carbuncle                     | Infections and infestations                          |
| Metabolism and nutrition disorders              | Alkalosis hypokalaemic          | 0.83241 | Skin striae                   | Skin and subcutaneous tissue disorders               |
| Reproductive system and breast disorders        | Ovarian failure                 | 0.83240 | Mucosal inflammation          | General disorders and administration site conditions |
| Musculoskeletal and connective tissue disorders | Neuropathic arthropathy         | 0.83238 | Hypercatabolism               | Metabolism and nutrition disorders                   |
| Musculoskeletal and connective tissue disorders | Neuropathic arthropathy         | 0.83238 | Laryngeal obstruction         | Respiratory, thoracic and mediastinal disorders      |
| Eye disorders                                   | Scleromalacia                   | 0.83238 | Neuropathic arthropathy       | Musculoskeletal and connective tissue disorders      |
| Musculoskeletal and connective tissue disorders | Neuropathic arthropathy         | 0.83238 | Nasal mucosa atrophy          | Respiratory, thoracic and mediastinal disorders      |
| Eye disorders                                   | Chorioretinopathy               | 0.83238 | Neuropathic arthropathy       | Musculoskeletal and connective tissue disorders      |
| Investigations                                  | Blood chromium decreased        | 0.83238 | Neuropathic arthropathy       | Musculoskeletal and connective tissue disorders      |
| Eye disorders                                   | Posterior capsule opacification | 0.83238 | Neuropathic arthropathy       | Musculoskeletal and connective tissue disorders      |
| Injury, poisoning and procedural complications  | Tendon injury                   | 0.83238 | Neuropathic arthropathy       | Musculoskeletal and connective tissue disorders      |
| Musculoskeletal and connective tissue disorders | Scoliosis                       | 0.83238 | Neuropathic arthropathy       | Musculoskeletal and connective tissue disorders      |
| Psychiatric disorders                           | Orgasm abnormal                 | 0.83228 | Obsessive-compulsive disorder | Psychiatric disorders                                |
| Investigations                                  | Calcium ionised decreased       | 0.83220 | Median nerve lesion           | Nervous system disorders                             |

| Basis data for network                          |                                    |         |                            |                                                                     |
|-------------------------------------------------|------------------------------------|---------|----------------------------|---------------------------------------------------------------------|
| SOC1                                            | AE1                                | score   | AE2                        | SOC2                                                                |
| Gastrointestinal disorders                      | Gastroduodenal haemorrhage         | 0.83220 | Calcium ionised decreased  | Investigations                                                      |
| Respiratory, thoracic and mediastinal disorders | Tonsillar disorder                 | 0.83220 | Calcium ionised decreased  | Investigations                                                      |
| Gastrointestinal disorders                      | Lower gastrointestinal haemorrhage | 0.83220 | Calcium ionised decreased  | Investigations                                                      |
| Investigations                                  | Calcium ionised decreased          | 0.83220 | Breast cancer female       | Neoplasms benign, malignant and unspecified (incl cysts and polyps) |
| Injury, poisoning and procedural complications  | Cartilage injury                   | 0.83220 | Calcium ionised decreased  | Investigations                                                      |
| Injury, poisoning and procedural complications  | Wrist fracture                     | 0.83220 | Calcium ionised decreased  | Investigations                                                      |
| Investigations                                  | Calcium ionised decreased          | 0.83220 | Oral infection             | Infections and infestations                                         |
| Skin and subcutaneous tissue disorders          | Purpura senile                     | 0.83220 | Calcium ionised decreased  | Investigations                                                      |
| Investigations                                  | Calcium ionised decreased          | 0.83220 | Allergy to arthropod bite  | Immune system disorders                                             |
| Investigations                                  | Urine potassium increased          | 0.83214 | Coombs test positive       | Investigations                                                      |
| Skin and subcutaneous tissue disorders          | Hypertrichosis                     | 0.83213 | Skin hypopigmentation      | Skin and subcutaneous tissue disorders                              |
| Endocrine disorders                             | Cushingoid                         | 0.83201 | Cerebral venous thrombosis | Nervous system disorders                                            |
| Reproductive system and breast disorders        | Penile swelling                    | 0.83195 | Carbuncle                  | Infections and infestations                                         |
| Gastrointestinal disorders                      | Lip blister                        | 0.83195 | Penile swelling            | Reproductive system and breast disorders                            |
| Reproductive system and breast disorders        | Penile swelling                    | 0.83195 | Intestinal mass            | Gastrointestinal disorders                                          |
| Skin and subcutaneous tissue disorders          | Hypertrichosis                     | 0.83194 | Skin atrophy               | Skin and subcutaneous tissue disorders                              |
| Metabolism and nutrition disorders              | Alkalosis hypokalaemic             | 0.83175 | Skin depigmentation        | Skin and subcutaneous tissue disorders                              |
| Endocrine disorders                             | Hypopituitarism                    | 0.83170 | Body fat disorder          | Metabolism and nutrition disorders                                  |
| Skin and subcutaneous tissue disorders          | Sticky skin                        | 0.83166 | Lymphoma cutis             | Neoplasms benign, malignant and unspecified (incl cysts and polyps) |
| Skin and subcutaneous tissue disorders          | Sticky skin                        | 0.83166 | Supernumerary nipple       | Congenital, familial and genetic disorders                          |

| Basis data for network                          |                                          |         |                             |                                                |
|-------------------------------------------------|------------------------------------------|---------|-----------------------------|------------------------------------------------|
| SOC1                                            | AE1                                      | score   | AE2                         | SOC2                                           |
| Musculoskeletal and connective tissue disorders | Intervertebral disc space narrowing      | 0.83166 | Sticky skin                 | Skin and subcutaneous tissue disorders         |
| Congenital, familial and genetic disorders      | Cryptorchism                             | 0.83166 | Sticky skin                 | Skin and subcutaneous tissue disorders         |
| Investigations                                  | Haptoglobin increased                    | 0.83166 | Sticky skin                 | Skin and subcutaneous tissue disorders         |
| Investigations                                  | Blood iron increased                     | 0.83166 | Sticky skin                 | Skin and subcutaneous tissue disorders         |
| Musculoskeletal and connective tissue disorders | Senile ankylosing vertebral hyperostosis | 0.83166 | Sticky skin                 | Skin and subcutaneous tissue disorders         |
| Investigations                                  | Haptoglobin decreased                    | 0.83166 | Sticky skin                 | Skin and subcutaneous tissue disorders         |
| Eye disorders                                   | Madarosis                                | 0.83166 | Sticky skin                 | Skin and subcutaneous tissue disorders         |
| Skin and subcutaneous tissue disorders          | Lichenification                          | 0.83166 | Sticky skin                 | Skin and subcutaneous tissue disorders         |
| Musculoskeletal and connective tissue disorders | Myopathy steroid                         | 0.83161 | Skin striae                 | Skin and subcutaneous tissue disorders         |
| Skin and subcutaneous tissue disorders          | Skin fragility                           | 0.83160 | Polycythaemia               | Blood and lymphatic system disorders           |
| Immune system disorders                         | Immunosuppression                        | 0.83157 | Corneal infection           | Infections and infestations                    |
| Skin and subcutaneous tissue disorders          | Skin hypopigmentation                    | 0.83146 | Spinal compression fracture | Injury, poisoning and procedural complications |
| Metabolism and nutrition disorders              | Alkalosis hypokalaemic                   | 0.83139 | Aortic aneurysm             | Vascular disorders                             |
| Skin and subcutaneous tissue disorders          | Skin depigmentation                      | 0.83138 | Spinal compression fracture | Injury, poisoning and procedural complications |
| Metabolism and nutrition disorders              | Alkalosis hypokalaemic                   | 0.83134 | Skin hypopigmentation       | Skin and subcutaneous tissue disorders         |
| Skin and subcutaneous tissue disorders          | Heat rash                                | 0.83133 | Adrenal suppression         | Endocrine disorders                            |
| Metabolism and nutrition disorders              | Body fat disorder                        | 0.83130 | Leukoderma                  | Skin and subcutaneous tissue disorders         |
| Cardiac disorders                               | Endocardial fibrosis                     | 0.83130 | Respiratory moniliasis      | Infections and infestations                    |
| Cardiac disorders                               | Endocardial fibrosis                     | 0.83130 | Pancreatic fistula          | Gastrointestinal disorders                     |
| Gastrointestinal disorders                      | Peritoneal fibrosis                      | 0.83130 | Endocardial fibrosis        | Cardiac disorders                              |

| Basis data for network                                              |                                             |         |                                        |                                                      |
|---------------------------------------------------------------------|---------------------------------------------|---------|----------------------------------------|------------------------------------------------------|
| SOC1                                                                | AE1                                         | score   | AE2                                    | SOC2                                                 |
| Eye disorders                                                       | Ocular hypertension                         | 0.83128 | Nasal septum perforation               | Respiratory, thoracic and mediastinal disorders      |
| Endocrine disorders                                                 | Hypothalamo-pituitary disorders             | 0.83127 | Leukoderma                             | Skin and subcutaneous tissue disorders               |
| Vascular disorders                                                  | Aortic aneurysm                             | 0.83126 | Spinal compression fracture            | Injury, poisoning and procedural complications       |
| Nervous system disorders                                            | Trigeminal nerve disorder                   | 0.83120 | Ocular hypertension                    | Eye disorders                                        |
| Endocrine disorders                                                 | Secondary adrenocortical insufficiency      | 0.83106 | Tendon rupture                         | Injury, poisoning and procedural complications       |
| Skin and subcutaneous tissue disorders                              | Skin atrophy                                | 0.83103 | General symptom                        | General disorders and administration site conditions |
| Nervous system disorders                                            | Areflexia                                   | 0.83101 | Sperm count increased                  | Investigations                                       |
| Musculoskeletal and connective tissue disorders                     | Extremity contracture                       | 0.83099 | Anhedonia                              | Psychiatric disorders                                |
| Renal and urinary disorders                                         | Glomerulonephritis rapidly progressive      | 0.83091 | Sweat discolouration                   | Skin and subcutaneous tissue disorders               |
| Investigations                                                      | Vascular test abnormal                      | 0.83082 | Paranoid personality disorder          | Psychiatric disorders                                |
| Investigations                                                      | Blood thyroid stimulating hormone increased | 0.83076 | Mucosal inflammation                   | General disorders and administration site conditions |
| Endocrine disorders                                                 | Cushingoid                                  | 0.83075 | Hypercoagulation                       | Blood and lymphatic system disorders                 |
| Skin and subcutaneous tissue disorders                              | Skin fragility                              | 0.83075 | Skin hypopigmentation                  | Skin and subcutaneous tissue disorders               |
| Investigations                                                      | Nitrogen balance negative                   | 0.83075 | Hypercoagulation                       | Blood and lymphatic system disorders                 |
| Reproductive system and breast disorders                            | Genital erythema                            | 0.83070 | Vaginal burning sensation              | Reproductive system and breast disorders             |
| Endocrine disorders                                                 | Adrenocortical insufficiency acute          | 0.83069 | Eye inflammation                       | Eye disorders                                        |
| Skin and subcutaneous tissue disorders                              | Fat atrophy                                 | 0.83067 | Skin hypopigmentation                  | Skin and subcutaneous tissue disorders               |
| Investigations                                                      | Blood viscosity increased                   | 0.83066 | Very low density lipoprotein increased | Investigations                                       |
| Investigations                                                      | Very low density lipoprotein increased      | 0.83066 | Total cholesterol/HDL ratio decreased  | Investigations                                       |
| Neoplasms benign, malignant and unspecified (incl cysts and polyps) | Adrenal neoplasm                            | 0.83066 | Very low density lipoprotein increased | Investigations                                       |

| Basis data for network                                              |                                |         |                               |                                                                     |
|---------------------------------------------------------------------|--------------------------------|---------|-------------------------------|---------------------------------------------------------------------|
| SOC1                                                                | AE1                            | score   | AE2                           | SOC2                                                                |
| Congenital, familial and genetic disorders                          | Tourette's disorder            | 0.83048 | Obsessive-compulsive disorder | Psychiatric disorders                                               |
| Investigations                                                      | Urine glucose false positive   | 0.83044 | Coombs test positive          | Investigations                                                      |
| General disorders and administration site conditions                | Bloody discharge               | 0.83041 | Atrophic vulvovaginitis       | Reproductive system and breast disorders                            |
| General disorders and administration site conditions                | Nonspecific reaction           | 0.83041 | Atrophic vulvovaginitis       | Reproductive system and breast disorders                            |
| Investigations                                                      | Platelet aggregation increased | 0.83037 | Obsessive-compulsive disorder | Psychiatric disorders                                               |
| Injury, poisoning and procedural complications                      | Spinal compression fracture    | 0.83037 | Skin atrophy                  | Skin and subcutaneous tissue disorders                              |
| Eye disorders                                                       | Pupil fixed                    | 0.83037 | Angle closure glaucoma        | Eye disorders                                                       |
| Injury, poisoning and procedural complications                      | Spinal fracture                | 0.83036 | Eye inflammation              | Eye disorders                                                       |
| Blood and lymphatic system disorders                                | Hypercoagulation               | 0.83034 | Polycythaemia                 | Blood and lymphatic system disorders                                |
| Psychiatric disorders                                               | Phobia of driving              | 0.83031 | Hepatic encephalopathy        | Nervous system disorders                                            |
| Cardiac disorders                                                   | Intracardiac thrombus          | 0.83019 | Pneumoperitoneum              | Gastrointestinal disorders                                          |
| Respiratory, thoracic and mediastinal disorders                     | Laryngeal disorder             | 0.83013 | Cardiac output decreased      | Investigations                                                      |
| Infections and infestations                                         | Renal abscess                  | 0.83001 | Arterial thrombosis limb      | Vascular disorders                                                  |
| Vascular disorders                                                  | Arterial thrombosis limb       | 0.83001 | Pituitary haemorrhage         | Endocrine disorders                                                 |
| Hepatobiliary disorders                                             | Biliary dilatation             | 0.83001 | Arterial thrombosis limb      | Vascular disorders                                                  |
| Vascular disorders                                                  | Arterial thrombosis limb       | 0.83001 | Bladder papilloma             | Neoplasms benign, malignant and unspecified (incl cysts and polyps) |
| Neoplasms benign, malignant and unspecified (incl cysts and polyps) | Biliary neoplasm               | 0.83001 | Arterial thrombosis limb      | Vascular disorders                                                  |
| Vascular disorders                                                  | Arterial thrombosis limb       | 0.83001 | Microlithiasis                | General disorders and administration site conditions                |
| Cardiac disorders                                                   | Hypertrophic cardiomyopathy    | 0.82997 | Virilism                      | Endocrine disorders                                                 |
| Nervous system disorders                                            | Areflexia                      | 0.82993 | Liver function test           | Investigations                                                      |

| Basis data for network                                              |                                             |         |                                   |                                                                     |
|---------------------------------------------------------------------|---------------------------------------------|---------|-----------------------------------|---------------------------------------------------------------------|
| SOC1                                                                | AE1                                         | score   | AE2                               | SOC2                                                                |
| Endocrine disorders                                                 | Adrenal suppression                         | 0.82989 | Glucose tolerance impaired        | Metabolism and nutrition disorders                                  |
| Neoplasms benign, malignant and unspecified (incl cysts and polyps) | Metastasis                                  | 0.82989 | Extremity necrosis                | Vascular disorders                                                  |
| Nervous system disorders                                            | Anosmia                                     | 0.82987 | Nasal mucosa atrophy              | Respiratory, thoracic and mediastinal disorders                     |
| Musculoskeletal and connective tissue disorders                     | Scoliosis                                   | 0.82987 | Anosmia                           | Nervous system disorders                                            |
| Respiratory, thoracic and mediastinal disorders                     | Laryngeal obstruction                       | 0.82987 | Anosmia                           | Nervous system disorders                                            |
| Eye disorders                                                       | Chorioretinopathy                           | 0.82987 | Anosmia                           | Nervous system disorders                                            |
| Nervous system disorders                                            | Anosmia                                     | 0.82987 | Tendon injury                     | Injury, poisoning and procedural complications                      |
| Nervous system disorders                                            | Anosmia                                     | 0.82987 | Posterior capsule opacification   | Eye disorders                                                       |
| Nervous system disorders                                            | Anosmia                                     | 0.82987 | Scleromalacia                     | Eye disorders                                                       |
| Investigations                                                      | Blood chromium decreased                    | 0.82987 | Anosmia                           | Nervous system disorders                                            |
| Respiratory, thoracic and mediastinal disorders                     | Nasal mucosal disorder                      | 0.82977 | Transaminases decreased           | Investigations                                                      |
| Respiratory, thoracic and mediastinal disorders                     | Nasal mucosal disorder                      | 0.82977 | Glucocorticoids decreased         | Investigations                                                      |
| Investigations                                                      | Bone density increased                      | 0.82977 | Nasal mucosal disorder            | Respiratory, thoracic and mediastinal disorders                     |
| Investigations                                                      | Pulmonary arterial wedge pressure increased | 0.82971 | Positive cardiac inotropic effect | General disorders and administration site conditions                |
| General disorders and administration site conditions                | Fibrosis                                    | 0.82964 | Cerebellar artery occlusion       | Nervous system disorders                                            |
| General disorders and administration site conditions                | Impaired healing                            | 0.82960 | Injection site abscess sterile    | General disorders and administration site conditions                |
| Endocrine disorders                                                 | Cushingoid                                  | 0.82959 | Hip fracture                      | Injury, poisoning and procedural complications                      |
| Skin and subcutaneous tissue disorders                              | Chloasma                                    | 0.82953 | Breast discharge                  | Reproductive system and breast disorders                            |
| Neoplasms benign, malignant and unspecified (incl cysts and polyps) | Fibromatosis                                | 0.82951 | Acromegaly                        | Endocrine disorders                                                 |
| Musculoskeletal and connective tissue disorders                     | Purple glove syndrome                       | 0.82951 | Fibroma                           | Neoplasms benign, malignant and unspecified (incl cysts and polyps) |



| Basis data for network                                              |                                 |         |                                      |                                                                     |
|---------------------------------------------------------------------|---------------------------------|---------|--------------------------------------|---------------------------------------------------------------------|
| SOC1                                                                | AE1                             | score   | AE2                                  | SOC2                                                                |
| Neoplasms benign, malignant and unspecified (incl cysts and polyps) | Fibromatosis                    | 0.82951 | Purple glove syndrome                | Musculoskeletal and connective tissue disorders                     |
| Neoplasms benign, malignant and unspecified (incl cysts and polyps) | Fibroma                         | 0.82951 | Blood antidiuretic hormone decreased | Investigations                                                      |
| Neoplasms benign, malignant and unspecified (incl cysts and polyps) | Fibromatosis                    | 0.82951 | Blood antidiuretic hormone decreased | Investigations                                                      |
| Endocrine disorders                                                 | Acromegaly                      | 0.82951 | Fibroma                              | Neoplasms benign, malignant and unspecified (incl cysts and polyps) |
| Psychiatric disorders                                               | Performance fear                | 0.82934 | Dissociative disorder                | Psychiatric disorders                                               |
| Vascular disorders                                                  | Vascular pseudoaneurysm         | 0.82934 | Blood cholinesterase decreased       | Investigations                                                      |
| Vascular disorders                                                  | Vascular pseudoaneurysm         | 0.82934 | Venous pressure increased            | Investigations                                                      |
| Gastrointestinal disorders                                          | Gingival hyperplasia            | 0.82917 | Cutaneous lupus erythematosus        | Skin and subcutaneous tissue disorders                              |
| Musculoskeletal and connective tissue disorders                     | Growth retardation              | 0.82916 | Tendon injury                        | Injury, poisoning and procedural complications                      |
| Respiratory, thoracic and mediastinal disorders                     | Nasal mucosa atrophy            | 0.82916 | Growth retardation                   | Musculoskeletal and connective tissue disorders                     |
| Musculoskeletal and connective tissue disorders                     | Growth retardation              | 0.82916 | Chorioretinopathy                    | Eye disorders                                                       |
| Musculoskeletal and connective tissue disorders                     | Growth retardation              | 0.82916 | Laryngeal obstruction                | Respiratory, thoracic and mediastinal disorders                     |
| Eye disorders                                                       | Posterior capsule opacification | 0.82916 | Growth retardation                   | Musculoskeletal and connective tissue disorders                     |
| Musculoskeletal and connective tissue disorders                     | Scoliosis                       | 0.82916 | Growth retardation                   | Musculoskeletal and connective tissue disorders                     |
| Investigations                                                      | Blood chromium decreased        | 0.82916 | Growth retardation                   | Musculoskeletal and connective tissue disorders                     |
| Eye disorders                                                       | Scleromalacia                   | 0.82916 | Growth retardation                   | Musculoskeletal and connective tissue disorders                     |
| Investigations                                                      | Pregnancy test false positive   | 0.82904 | Choreoathetosis                      | Nervous system disorders                                            |
| Skin and subcutaneous tissue disorders                              | Vasculitic rash                 | 0.82896 | Nasal candidiasis                    | Infections and infestations                                         |
| Skin and subcutaneous tissue disorders                              | Skin atrophy                    | 0.82880 | Leukoderma                           | Skin and subcutaneous tissue disorders                              |
| Investigations                                                      | Sperm count increased           | 0.82876 | Cardiac output decreased             | Investigations                                                      |

| Basis data for network                          |                                            |         |                                |                                                                     |
|-------------------------------------------------|--------------------------------------------|---------|--------------------------------|---------------------------------------------------------------------|
| SOC1                                            | AE1                                        | score   | AE2                            | SOC2                                                                |
| Gastrointestinal disorders                      | Neutropenic colitis                        | 0.82872 | Autonomic neuropathy           | Nervous system disorders                                            |
| Musculoskeletal and connective tissue disorders | Joint destruction                          | 0.82870 | Urine potassium decreased      | Investigations                                                      |
| Investigations                                  | Urine sodium decreased                     | 0.82870 | Rectal perforation             | Gastrointestinal disorders                                          |
| Investigations                                  | Urine potassium decreased                  | 0.82870 | Inborn error of metabolism     | Congenital, familial and genetic disorders                          |
| Investigations                                  | Urine sodium decreased                     | 0.82870 | Urine osmolarity decreased     | Investigations                                                      |
| Investigations                                  | Urine osmolarity decreased                 | 0.82870 | Urine potassium decreased      | Investigations                                                      |
| Investigations                                  | Urine sodium decreased                     | 0.82870 | Inborn error of metabolism     | Congenital, familial and genetic disorders                          |
| Gastrointestinal disorders                      | Rectal perforation                         | 0.82870 | Urine potassium decreased      | Investigations                                                      |
| Investigations                                  | Urine sodium decreased                     | 0.82870 | Joint destruction              | Musculoskeletal and connective tissue disorders                     |
| Respiratory, thoracic and mediastinal disorders | Foreign body aspiration                    | 0.82868 | CSF protein abnormal           | Investigations                                                      |
| Skin and subcutaneous tissue disorders          | Panniculitis                               | 0.82864 | Tumour lysis syndrome          | Neoplasms benign, malignant and unspecified (incl cysts and polyps) |
| Nervous system disorders                        | Tongue paralysis                           | 0.82853 | Ejaculation failure            | Reproductive system and breast disorders                            |
| Skin and subcutaneous tissue disorders          | Fat atrophy                                | 0.82844 | Conjunctival bleb              | Eye disorders                                                       |
| Investigations                                  | Spermatozoa progressive motility decreased | 0.82841 | Asphyxia                       | Respiratory, thoracic and mediastinal disorders                     |
| Infections and infestations                     | Relapsing fever                            | 0.82835 | Nephritis                      | Renal and urinary disorders                                         |
| Skin and subcutaneous tissue disorders          | Skin depigmentation                        | 0.82833 | Myopathy steroid               | Musculoskeletal and connective tissue disorders                     |
| Gastrointestinal disorders                      | Aptyalism                                  | 0.82829 | Neuroleptic malignant syndrome | Nervous system disorders                                            |
| Nervous system disorders                        | Global amnesia                             | 0.82826 | Colour vision tests abnormal   | Investigations                                                      |
| Infections and infestations                     | Candiduria                                 | 0.82823 | Chondropathy                   | Musculoskeletal and connective tissue disorders                     |
| Psychiatric disorders                           | Obsessive-compulsive disorder              | 0.82822 | Acute respiratory failure      | Respiratory, thoracic and mediastinal disorders                     |

| Basis data for network                          |                                            |         |                                        |                                                 |
|-------------------------------------------------|--------------------------------------------|---------|----------------------------------------|-------------------------------------------------|
| SOC1                                            | AE1                                        | score   | AE2                                    | SOC2                                            |
| Investigations                                  | Blood chromium decreased                   | 0.82820 | Hypercorticism                         | Endocrine disorders                             |
| Endocrine disorders                             | Hypercorticism                             | 0.82820 | Nasal mucosa atrophy                   | Respiratory, thoracic and mediastinal disorders |
| Eye disorders                                   | Scleromalacia                              | 0.82820 | Hypercorticism                         | Endocrine disorders                             |
| Endocrine disorders                             | Hypercorticism                             | 0.82820 | Tendon injury                          | Injury, poisoning and procedural complications  |
| Musculoskeletal and connective tissue disorders | Scoliosis                                  | 0.82820 | Hypercorticism                         | Endocrine disorders                             |
| Endocrine disorders                             | Hypercorticism                             | 0.82820 | Posterior capsule opacification        | Eye disorders                                   |
| Endocrine disorders                             | Hypercorticism                             | 0.82820 | Chorioretinopathy                      | Eye disorders                                   |
| Endocrine disorders                             | Hypercorticism                             | 0.82820 | Laryngeal obstruction                  | Respiratory, thoracic and mediastinal disorders |
| Investigations                                  | Spermatozoa progressive motility decreased | 0.82817 | Aspiration                             | Respiratory, thoracic and mediastinal disorders |
| Gastrointestinal disorders                      | Large intestine perforation                | 0.82803 | Fluid imbalance                        | Metabolism and nutrition disorders              |
| Renal and urinary disorders                     | Nephrotic syndrome                         | 0.82803 | Glomerulonephritis                     | Renal and urinary disorders                     |
| Nervous system disorders                        | Tongue paralysis                           | 0.82794 | Platelet aggregation increased         | Investigations                                  |
| Vascular disorders                              | Aortic aneurysm                            | 0.82786 | Secondary adrenocortical insufficiency | Endocrine disorders                             |
| Reproductive system and breast disorders        | Uterine perforation                        | 0.82784 | Uterine cervical laceration            | Reproductive system and breast disorders        |
| Reproductive system and breast disorders        | Uterine perforation                        | 0.82784 | Growth of eyelashes                    | Eye disorders                                   |
| Injury, poisoning and procedural complications  | Uterine rupture                            | 0.82784 | Uterine perforation                    | Reproductive system and breast disorders        |
| Endocrine disorders                             | Hypercorticism                             | 0.82778 | Fat atrophy                            | Skin and subcutaneous tissue disorders          |
| Musculoskeletal and connective tissue disorders | Exostosis                                  | 0.82771 | Uterine hypertonus                     | Pregnancy, puerperium and perinatal conditions  |
| Vascular disorders                              | Aortic aneurysm                            | 0.82769 | Body fat disorder                      | Metabolism and nutrition disorders              |
| Pregnancy, puerperium and perinatal conditions  | Oligohydramnios                            | 0.82765 | Renal failure neonatal                 | Renal and urinary disorders                     |

| Basis data for network                          |                                 |         |                          |                                                 |
|-------------------------------------------------|---------------------------------|---------|--------------------------|-------------------------------------------------|
| SOC1                                            | AE1                             | score   | AE2                      | SOC2                                            |
| Endocrine disorders                             | Virilism                        | 0.82758 | Urine calcium increased  | Investigations                                  |
| Musculoskeletal and connective tissue disorders | Growth retardation              | 0.82752 | Grey syndrome neonatal   | Cardiac disorders                               |
| Skin and subcutaneous tissue disorders          | Heat rash                       | 0.82745 | Hypertrichosis           | Skin and subcutaneous tissue disorders          |
| Vascular disorders                              | Aortic aneurysm                 | 0.82742 | Myopathy steroid         | Musculoskeletal and connective tissue disorders |
| Endocrine disorders                             | Hypothalamo-pituitary disorders | 0.82735 | Hypertrichosis           | Skin and subcutaneous tissue disorders          |
| Investigations                                  | Vitamin B12 decreased           | 0.82729 | Iron deficiency          | Metabolism and nutrition disorders              |
| Hepatobiliary disorders                         | Hepatobiliary disease           | 0.82713 | Drug level increased     | Investigations                                  |
| Investigations                                  | Haematocrit                     | 0.82713 | Hepatobiliary disease    | Hepatobiliary disorders                         |
| Hepatobiliary disorders                         | Hepatobiliary disease           | 0.82713 | Haemoglobin              | Investigations                                  |
| Hepatobiliary disorders                         | Hepatobiliary disease           | 0.82713 | Lobar pneumonia          | Infections and infestations                     |
| Investigations                                  | Blood electrolytes increased    | 0.82713 | Hepatobiliary disease    | Hepatobiliary disorders                         |
| Hepatobiliary disorders                         | Hepatobiliary disease           | 0.82713 | Electrophoresis abnormal | Investigations                                  |
| Metabolism and nutrition disorders              | Glucose tolerance impaired      | 0.82710 | Panniculitis             | Skin and subcutaneous tissue disorders          |
| Investigations                                  | Nitrogen balance negative       | 0.82710 | Hip fracture             | Injury, poisoning and procedural complications  |
| Metabolism and nutrition disorders              | Glucose tolerance impaired      | 0.82697 | Hip fracture             | Injury, poisoning and procedural complications  |
| Skin and subcutaneous tissue disorders          | Skin striae                     | 0.82686 | Hypertrichosis           | Skin and subcutaneous tissue disorders          |
| Immune system disorders                         | Immunosuppression               | 0.82673 | Catabolic state          | Metabolism and nutrition disorders              |
| Gastrointestinal disorders                      | Large intestine perforation     | 0.82663 | Cushingoid               | Endocrine disorders                             |
| Cardiac disorders                               | Grey syndrome neonatal          | 0.82658 | Eye inflammation         | Eye disorders                                   |
| Respiratory, thoracic and mediastinal disorders | Pulmonary granuloma             | 0.82657 | Ureteral spasm           | Renal and urinary disorders                     |

| Basis data for network                                              |                                  |         |                                 |                                                      |
|---------------------------------------------------------------------|----------------------------------|---------|---------------------------------|------------------------------------------------------|
| SOC1                                                                | AE1                              | score   | AE2                             | SOC2                                                 |
| Psychiatric disorders                                               | Orgasm abnormal                  | 0.82655 | Asphyxia                        | Respiratory, thoracic and mediastinal disorders      |
| Gastrointestinal disorders                                          | Peptic ulcer perforation         | 0.82643 | Cerebral venous thrombosis      | Nervous system disorders                             |
| Gastrointestinal disorders                                          | Anal ulcer                       | 0.82641 | Pericardial rub                 | Cardiac disorders                                    |
| Gastrointestinal disorders                                          | Rectal polyp                     | 0.82638 | Polyp                           | General disorders and administration site conditions |
| Investigations                                                      | Blood growth hormone abnormal    | 0.82638 | Polyp                           | General disorders and administration site conditions |
| General disorders and administration site conditions                | Polyp                            | 0.82638 | Radius fracture                 | Injury, poisoning and procedural complications       |
| Respiratory, thoracic and mediastinal disorders                     | Pleural rub                      | 0.82638 | Polyp                           | General disorders and administration site conditions |
| General disorders and administration site conditions                | Implant expulsion                | 0.82638 | Polyp                           | General disorders and administration site conditions |
| General disorders and administration site conditions                | Polyp                            | 0.82638 | Testis discomfort               | Reproductive system and breast disorders             |
| Neoplasms benign, malignant and unspecified (incl cysts and polyps) | Throat cancer                    | 0.82638 | Polyp                           | General disorders and administration site conditions |
| Infections and infestations                                         | Listeriosis                      | 0.82638 | Polyp                           | General disorders and administration site conditions |
| General disorders and administration site conditions                | Injection site paraesthesia      | 0.82638 | Polyp                           | General disorders and administration site conditions |
| Eye disorders                                                       | Exophthalmos                     | 0.82631 | Corneal infection               | Infections and infestations                          |
| Respiratory, thoracic and mediastinal disorders                     | Laryngeal disorder               | 0.82630 | Areflexia                       | Nervous system disorders                             |
| Skin and subcutaneous tissue disorders                              | Fat atrophy                      | 0.82628 | Immunosuppression               | Immune system disorders                              |
| Gastrointestinal disorders                                          | Gastroduodenal ulcer             | 0.82627 | Panniculitis                    | Skin and subcutaneous tissue disorders               |
| Nervous system disorders                                            | Benign intracranial hypertension | 0.82612 | Sodium retention                | Metabolism and nutrition disorders                   |
| Skin and subcutaneous tissue disorders                              | Skin fragility                   | 0.82610 | Hypothalamo-pituitary disorders | Endocrine disorders                                  |
| Injury, poisoning and procedural complications                      | Spinal fracture                  | 0.82598 | Hypercorticism                  | Endocrine disorders                                  |
| Musculoskeletal and connective tissue disorders                     | Myopathy steroid                 | 0.82591 | Conjunctival bleb               | Eye disorders                                        |

| Basis data for network                                              |                                  |         |                                    |                                                      |
|---------------------------------------------------------------------|----------------------------------|---------|------------------------------------|------------------------------------------------------|
| SOC1                                                                | AE1                              | score   | AE2                                | SOC2                                                 |
| Endocrine disorders                                                 | Pituitary haemorrhage            | 0.82587 | Mean arterial pressure increased   | Investigations                                       |
| Investigations                                                      | Mean arterial pressure increased | 0.82587 | Renal abscess                      | Infections and infestations                          |
| General disorders and administration site conditions                | Microlithiasis                   | 0.82587 | Mean arterial pressure increased   | Investigations                                       |
| Neoplasms benign, malignant and unspecified (incl cysts and polyps) | Biliary neoplasm                 | 0.82587 | Mean arterial pressure increased   | Investigations                                       |
| Neoplasms benign, malignant and unspecified (incl cysts and polyps) | Bladder papilloma                | 0.82587 | Mean arterial pressure increased   | Investigations                                       |
| Hepatobiliary disorders                                             | Biliary dilatation               | 0.82587 | Mean arterial pressure increased   | Investigations                                       |
| Metabolism and nutrition disorders                                  | Glucose tolerance impaired       | 0.82584 | Peptic ulcer perforation           | Gastrointestinal disorders                           |
| Investigations                                                      | Dehydroepiandrosterone increased | 0.82582 | Monoplegia                         | Nervous system disorders                             |
| Endocrine disorders                                                 | Cushingoid                       | 0.82567 | Peptic ulcer perforation           | Gastrointestinal disorders                           |
| Respiratory, thoracic and mediastinal disorders                     | Nasal septum perforation         | 0.82556 | Trigeminal nerve disorder          | Nervous system disorders                             |
| Skin and subcutaneous tissue disorders                              | Skin atrophy                     | 0.82555 | Adrenocortical insufficiency acute | Endocrine disorders                                  |
| Metabolism and nutrition disorders                                  | Fluid imbalance                  | 0.82553 | Gastroduodenal ulcer               | Gastrointestinal disorders                           |
| Eye disorders                                                       | Exophthalmos                     | 0.82553 | Spinal fracture                    | Injury, poisoning and procedural complications       |
| Skin and subcutaneous tissue disorders                              | Panniculitis                     | 0.82553 | Injection site abscess sterile     | General disorders and administration site conditions |
| Vascular disorders                                                  | Aortic aneurysm                  | 0.82547 | Eye inflammation                   | Eye disorders                                        |
| Eye disorders                                                       | Cataract subcapsular             | 0.82537 | Tendon rupture                     | Injury, poisoning and procedural complications       |
| Nervous system disorders                                            | Anosmia                          | 0.82536 | Fat atrophy                        | Skin and subcutaneous tissue disorders               |
| Investigations                                                      | Aspartate aminotransferase       | 0.82536 | Alanine aminotransferase           | Investigations                                       |
| Immune system disorders                                             | Jarisch-Herxheimer reaction      | 0.82533 | Nephritis                          | Renal and urinary disorders                          |
| Eye disorders                                                       | Disorder of globe                | 0.82533 | Adrenocortical insufficiency acute | Endocrine disorders                                  |

| Basis data for network                          |                                    |         |                                     |                                                 |
|-------------------------------------------------|------------------------------------|---------|-------------------------------------|-------------------------------------------------|
| SOC1                                            | AE1                                | score   | AE2                                 | SOC2                                            |
| Injury, poisoning and procedural complications  | Tendon injury                      | 0.82532 | Polycythaemia                       | Blood and lymphatic system disorders            |
| Eye disorders                                   | Chorioretinopathy                  | 0.82532 | Polycythaemia                       | Blood and lymphatic system disorders            |
| Blood and lymphatic system disorders            | Polycythaemia                      | 0.82532 | Scleromalacia                       | Eye disorders                                   |
| Musculoskeletal and connective tissue disorders | Scoliosis                          | 0.82532 | Polycythaemia                       | Blood and lymphatic system disorders            |
| Blood and lymphatic system disorders            | Polycythaemia                      | 0.82532 | Nasal mucosa atrophy                | Respiratory, thoracic and mediastinal disorders |
| Blood and lymphatic system disorders            | Polycythaemia                      | 0.82532 | Blood chromium decreased            | Investigations                                  |
| Blood and lymphatic system disorders            | Polycythaemia                      | 0.82532 | Laryngeal obstruction               | Respiratory, thoracic and mediastinal disorders |
| Eye disorders                                   | Posterior capsule opacification    | 0.82532 | Polycythaemia                       | Blood and lymphatic system disorders            |
| Investigations                                  | Electrocardiogram P wave abnormal  | 0.82522 | Electrocardiogram R on T phenomenon | Investigations                                  |
| Investigations                                  | Electrocardiogram P wave abnormal  | 0.82522 | Tongue biting                       | Nervous system disorders                        |
| Investigations                                  | Electrocardiogram P wave abnormal  | 0.82522 | Heterophoria                        | Eye disorders                                   |
| Respiratory, thoracic and mediastinal disorders | Nasal septum perforation           | 0.82520 | Nasal septum disorder               | Respiratory, thoracic and mediastinal disorders |
| Musculoskeletal and connective tissue disorders | Bone formation decreased           | 0.82509 | Dental discomfort                   | Gastrointestinal disorders                      |
| Renal and urinary disorders                     | Urinary tract obstruction          | 0.82508 | Ureteric obstruction                | Renal and urinary disorders                     |
| Renal and urinary disorders                     | Urinary tract obstruction          | 0.82508 | Ovarian atrophy                     | Reproductive system and breast disorders        |
| Injury, poisoning and procedural complications  | Scrotal haematoma                  | 0.82508 | Urinary tract obstruction           | Renal and urinary disorders                     |
| Infections and infestations                     | Scrotal infection                  | 0.82508 | Urinary tract obstruction           | Renal and urinary disorders                     |
| Gastrointestinal disorders                      | Gastrointestinal motility disorder | 0.82506 | Pulmonary granuloma                 | Respiratory, thoracic and mediastinal disorders |
| Investigations                                  | Platelet aggregation increased     | 0.82501 | Acute respiratory failure           | Respiratory, thoracic and mediastinal disorders |
| Investigations                                  | Cortisol free urine decreased      | 0.82500 | Blood cortisol decreased            | Investigations                                  |

| Basis data for network                          |                                    |         |                                 |                                                                     |
|-------------------------------------------------|------------------------------------|---------|---------------------------------|---------------------------------------------------------------------|
| SOC1                                            | AE1                                | score   | AE2                             | SOC2                                                                |
| Endocrine disorders                             | Cushingoid                         | 0.82498 | Cushing's syndrome              | Endocrine disorders                                                 |
| Infections and infestations                     | Mucocutaneous candidiasis          | 0.82497 | Gouty arthritis                 | Musculoskeletal and connective tissue disorders                     |
| Immune system disorders                         | Allergy to chemicals               | 0.82497 | Gouty arthritis                 | Musculoskeletal and connective tissue disorders                     |
| Musculoskeletal and connective tissue disorders | Gouty arthritis                    | 0.82497 | Renal impairment neonatal       | Renal and urinary disorders                                         |
| Endocrine disorders                             | Adrenocortical insufficiency acute | 0.82481 | Tumour lysis syndrome           | Neoplasms benign, malignant and unspecified (incl cysts and polyps) |
| Skin and subcutaneous tissue disorders          | Fat atrophy                        | 0.82481 | Optic neuropathy                | Eye disorders                                                       |
| Ear and labyrinth disorders                     | Vestibular disorder                | 0.82469 | Deafness permanent              | Ear and labyrinth disorders                                         |
| Eye disorders                                   | Scleromalacia                      | 0.82463 | Conjunctivitis allergic         | Eye disorders                                                       |
| Eye disorders                                   | Conjunctivitis allergic            | 0.82463 | Laryngeal obstruction           | Respiratory, thoracic and mediastinal disorders                     |
| Eye disorders                                   | Conjunctivitis allergic            | 0.82463 | Blood chromium decreased        | Investigations                                                      |
| Eye disorders                                   | Conjunctivitis allergic            | 0.82463 | Posterior capsule opacification | Eye disorders                                                       |
| Respiratory, thoracic and mediastinal disorders | Nasal mucosa atrophy               | 0.82463 | Conjunctivitis allergic         | Eye disorders                                                       |
| Musculoskeletal and connective tissue disorders | Scoliosis                          | 0.82463 | Conjunctivitis allergic         | Eye disorders                                                       |
| Injury, poisoning and procedural complications  | Tendon injury                      | 0.82463 | Conjunctivitis allergic         | Eye disorders                                                       |
| Eye disorders                                   | Conjunctivitis allergic            | 0.82463 | Chorioretinopathy               | Eye disorders                                                       |
| Metabolism and nutrition disorders              | Fluid imbalance                    | 0.82461 | Virilism                        | Endocrine disorders                                                 |
| Reproductive system and breast disorders        | Peyronie's disease                 | 0.82444 | Consciousness fluctuating       | Nervous system disorders                                            |
| Eye disorders                                   | Cycloplegia                        | 0.82440 | Angle closure glaucoma          | Eye disorders                                                       |
| Injury, poisoning and procedural complications  | Traumatic arthropathy              | 0.82432 | Facial paresis                  | Nervous system disorders                                            |
| Infections and infestations                     | Relapsing fever                    | 0.82417 | Vitamin K deficiency            | Metabolism and nutrition disorders                                  |



| Basis data for network                                              |                          |         |                                        |                                                 |
|---------------------------------------------------------------------|--------------------------|---------|----------------------------------------|-------------------------------------------------|
| SOC1                                                                | AE1                      | score   | AE2                                    | SOC2                                            |
| Nervous system disorders                                            | Tardive dyskinesia       | 0.82410 | Facial spasm                           | Nervous system disorders                        |
| Metabolism and nutrition disorders                                  | Catabolic state          | 0.82409 | Neuropathic arthropathy                | Musculoskeletal and connective tissue disorders |
| Musculoskeletal and connective tissue disorders                     | Neuropathic arthropathy  | 0.82406 | Disorder of globe                      | Eye disorders                                   |
| Vascular disorders                                                  | Aortic aneurysm          | 0.82386 | Virilism                               | Endocrine disorders                             |
| Eye disorders                                                       | Conjunctival bleb        | 0.82376 | Alkalosis hypokalaemic                 | Metabolism and nutrition disorders              |
| Neoplasms benign, malignant and unspecified (incl cysts and polyps) | Tumour flare             | 0.82373 | Endometrial atrophy                    | Reproductive system and breast disorders        |
| Nervous system disorders                                            | Clumsiness               | 0.82371 | Hepatic encephalopathy                 | Nervous system disorders                        |
| Gastrointestinal disorders                                          | Gastroduodenal ulcer     | 0.82365 | Cerebral venous thrombosis             | Nervous system disorders                        |
| Immune system disorders                                             | Immunosuppression        | 0.82365 | Adrenocortical insufficiency acute     | Endocrine disorders                             |
| Skin and subcutaneous tissue disorders                              | Skin depigmentation      | 0.82356 | Secondary adrenocortical insufficiency | Endocrine disorders                             |
| Injury, poisoning and procedural complications                      | Spinal fracture          | 0.82351 | Polycythaemia                          | Blood and lymphatic system disorders            |
| Gastrointestinal disorders                                          | Gastroduodenal ulcer     | 0.82348 | Hip fracture                           | Injury, poisoning and procedural complications  |
| Investigations                                                      | Sperm count increased    | 0.82347 | Ejaculation failure                    | Reproductive system and breast disorders        |
| Investigations                                                      | HIV test positive        | 0.82342 | Specific gravity urine abnormal        | Investigations                                  |
| Nervous system disorders                                            | Tongue paralysis         | 0.82341 | Obsessive-compulsive disorder          | Psychiatric disorders                           |
| Eye disorders                                                       | Exophthalmos             | 0.82340 | Scleromalacia                          | Eye disorders                                   |
| Eye disorders                                                       | Chorioretinopathy        | 0.82340 | Exophthalmos                           | Eye disorders                                   |
| Investigations                                                      | Blood chromium decreased | 0.82340 | Exophthalmos                           | Eye disorders                                   |
| Eye disorders                                                       | Exophthalmos             | 0.82340 | Laryngeal obstruction                  | Respiratory, thoracic and mediastinal disorders |
| Injury, poisoning and procedural complications                      | Tendon injury            | 0.82340 | Exophthalmos                           | Eye disorders                                   |

| Basis data for network                                              |                                 |         |                               |                                                                     |
|---------------------------------------------------------------------|---------------------------------|---------|-------------------------------|---------------------------------------------------------------------|
| SOC1                                                                | AE1                             | score   | AE2                           | SOC2                                                                |
| Eye disorders                                                       | Posterior capsule opacification | 0.82340 | Exophthalmos                  | Eye disorders                                                       |
| Eye disorders                                                       | Exophthalmos                    | 0.82340 | Scoliosis                     | Musculoskeletal and connective tissue disorders                     |
| Respiratory, thoracic and mediastinal disorders                     | Nasal mucosa atrophy            | 0.82340 | Exophthalmos                  | Eye disorders                                                       |
| Skin and subcutaneous tissue disorders                              | Skin fragility                  | 0.82333 | Leukoderma                    | Skin and subcutaneous tissue disorders                              |
| Blood and lymphatic system disorders                                | Anaemia haemolytic autoimmune   | 0.82326 | Coombs test positive          | Investigations                                                      |
| Nervous system disorders                                            | Anosmia                         | 0.82326 | Adrenal suppression           | Endocrine disorders                                                 |
| Eye disorders                                                       | Cataract subcapsular            | 0.82320 | Anosmia                       | Nervous system disorders                                            |
| General disorders and administration site conditions                | Implant expulsion               | 0.82306 | Tumour flare                  | Neoplasms benign, malignant and unspecified (incl cysts and polyps) |
| Neoplasms benign, malignant and unspecified (incl cysts and polyps) | Tumour flare                    | 0.82306 | Throat cancer                 | Neoplasms benign, malignant and unspecified (incl cysts and polyps) |
| Neoplasms benign, malignant and unspecified (incl cysts and polyps) | Tumour flare                    | 0.82306 | Blood growth hormone abnormal | Investigations                                                      |
| Neoplasms benign, malignant and unspecified (incl cysts and polyps) | Tumour flare                    | 0.82306 | Listeriosis                   | Infections and infestations                                         |
| Neoplasms benign, malignant and unspecified (incl cysts and polyps) | Tumour flare                    | 0.82306 | Radius fracture               | Injury, poisoning and procedural complications                      |
| Reproductive system and breast disorders                            | Testis discomfort               | 0.82306 | Tumour flare                  | Neoplasms benign, malignant and unspecified (incl cysts and polyps) |
| Neoplasms benign, malignant and unspecified (incl cysts and polyps) | Tumour flare                    | 0.82306 | Injection site paraesthesia   | General disorders and administration site conditions                |
| Neoplasms benign, malignant and unspecified (incl cysts and polyps) | Tumour flare                    | 0.82306 | Rectal polyp                  | Gastrointestinal disorders                                          |
| Respiratory, thoracic and mediastinal disorders                     | Pleural rub                     | 0.82306 | Tumour flare                  | Neoplasms benign, malignant and unspecified (incl cysts and polyps) |
| Neoplasms benign, malignant and unspecified (incl cysts and polyps) | Haemangioma of liver            | 0.82306 | Contact lens intolerance      | Eye disorders                                                       |
| Pregnancy, puerperium and perinatal conditions                      | Foetal cardiac disorder         | 0.82296 | Neonatal pneumonia            | Infections and infestations                                         |
| Pregnancy, puerperium and perinatal conditions                      | Foetal cardiac disorder         | 0.82296 | Fever neonatal                | General disorders and administration site conditions                |

| Basis data for network                         |                         |         |                   |                            |
|------------------------------------------------|-------------------------|---------|-------------------|----------------------------|
| SOC1                                           | AE1                     | score   | AE2               | SOC2                       |
| Pregnancy, puerperium and perinatal conditions | Foetal cardiac disorder | 0.82296 | Vomiting neonatal | Gastrointestinal disorders |

| Basis data for network                          |                                 |         |                                               |                                                                     |
|-------------------------------------------------|---------------------------------|---------|-----------------------------------------------|---------------------------------------------------------------------|
| SOC1                                            | AE1                             | score   | AE2                                           | SOC2                                                                |
| Respiratory, thoracic and mediastinal disorders | Neonatal tachypnoea             | 0.82296 | Foetal cardiac disorder                       | Pregnancy, puerperium and perinatal conditions                      |
| Pregnancy, puerperium and perinatal conditions  | Foetal cardiac disorder         | 0.82296 | Neonatal infection                            | Infections and infestations                                         |
| Investigations                                  | Cardiac output decreased        | 0.82295 | Injection site abscess                        | Infections and infestations                                         |
| Musculoskeletal and connective tissue disorders | Growth retardation              | 0.82295 | Hypertrophic cardiomyopathy                   | Cardiac disorders                                                   |
| Infections and infestations                     | Fungaemia                       | 0.82290 | Alcoholic pancreatitis                        | Gastrointestinal disorders                                          |
| Infections and infestations                     | Urinary tract infection fungal  | 0.82290 | Fungaemia                                     | Infections and infestations                                         |
| Infections and infestations                     | Fungaemia                       | 0.82290 | Infusion site bruising                        | General disorders and administration site conditions                |
| Eye disorders                                   | Episcleritis                    | 0.82282 | Osteocalcin decreased                         | Investigations                                                      |
| Eye disorders                                   | Episcleritis                    | 0.82282 | Blood 1,25-dihydroxycholecalciferol increased | Investigations                                                      |
| Endocrine disorders                             | Hypothalamo-pituitary disorders | 0.82279 | Corneal infection                             | Infections and infestations                                         |
| Investigations                                  | Respiratory rate decreased      | 0.82274 | Blood thyroid stimulating hormone decreased   | Investigations                                                      |
| Skin and subcutaneous tissue disorders          | Skin hypopigmentation           | 0.82270 | General symptom                               | General disorders and administration site conditions                |
| Gastrointestinal disorders                      | Peptic ulcer perforation        | 0.82269 | Neuropathic arthropathy                       | Musculoskeletal and connective tissue disorders                     |
| Cardiac disorders                               | Myocardial rupture              | 0.82267 | Grey syndrome neonatal                        | Cardiac disorders                                                   |
| Gastrointestinal disorders                      | Large intestine perforation     | 0.82255 | Glucose tolerance impaired                    | Metabolism and nutrition disorders                                  |
| Skin and subcutaneous tissue disorders          | Skin warm                       | 0.82254 | Mean arterial pressure decreased              | Investigations                                                      |
| Nervous system disorders                        | Status epilepticus              | 0.82247 | Antisocial behaviour                          | Psychiatric disorders                                               |
| Eye disorders                                   | Iris disorder                   | 0.82243 | Oral mucosa atrophy                           | Gastrointestinal disorders                                          |
| Eye disorders                                   | Iris disorder                   | 0.82243 | Oral neoplasm                                 | Neoplasms benign, malignant and unspecified (incl cysts and polyps) |
| Eye disorders                                   | Optic neuropathy                | 0.82236 | Cerebral venous thrombosis                    | Nervous system disorders                                            |

| Basis data for network                               |                            |         |                                    |                                                |
|------------------------------------------------------|----------------------------|---------|------------------------------------|------------------------------------------------|
| SOC1                                                 | AE1                        | score   | AE2                                | SOC2                                           |
| Endocrine disorders                                  | Cushingoid                 | 0.82236 | Hypercorticism                     | Endocrine disorders                            |
| Cardiac disorders                                    | Grey syndrome neonatal     | 0.82229 | Exophthalmos                       | Eye disorders                                  |
| Nervous system disorders                             | Anosmia                    | 0.82219 | Spinal fracture                    | Injury, poisoning and procedural complications |
| Renal and urinary disorders                          | Hyperphosphaturia          | 0.82218 | Anal inflammation                  | Gastrointestinal disorders                     |
| Infections and infestations                          | Staphylococcal bacteraemia | 0.82218 | Pneumonia bacterial                | Infections and infestations                    |
| Eye disorders                                        | Scleral disorder           | 0.82203 | Conjunctival scar                  | Eye disorders                                  |
| Eye disorders                                        | Conjunctival scar          | 0.82203 | Intraocular pressure test abnormal | Investigations                                 |
| Skin and subcutaneous tissue disorders               | Heat rash                  | 0.82195 | Cataract subcapsular               | Eye disorders                                  |
| Nervous system disorders                             | Tardive dyskinesia         | 0.82190 | Pregnancy test false positive      | Investigations                                 |
| Metabolism and nutrition disorders                   | Dyslipidaemia              | 0.82169 | Cerebral venous thrombosis         | Nervous system disorders                       |
| General disorders and administration site conditions | Fibrosis                   | 0.82169 | Arterial stenosis                  | Vascular disorders                             |
| Skin and subcutaneous tissue disorders               | Skin depigmentation        | 0.82168 | Virilism                           | Endocrine disorders                            |
| Immune system disorders                              | Immunosuppression          | 0.82165 | Grey syndrome neonatal             | Cardiac disorders                              |
| Metabolism and nutrition disorders                   | Body fat disorder          | 0.82160 | Virilism                           | Endocrine disorders                            |
| Nervous system disorders                             | Spinocerebellar disorder   | 0.82148 | Haematocrit                        | Investigations                                 |
| Investigations                                       | Electrophoresis abnormal   | 0.82148 | Spinocerebellar disorder           | Nervous system disorders                       |
| Investigations                                       | Drug level increased       | 0.82148 | Spinocerebellar disorder           | Nervous system disorders                       |
| Nervous system disorders                             | Spinocerebellar disorder   | 0.82148 | Blood electrolytes increased       | Investigations                                 |
| Infections and infestations                          | Lobar pneumonia            | 0.82148 | Spinocerebellar disorder           | Nervous system disorders                       |
| Nervous system disorders                             | Spinocerebellar disorder   | 0.82148 | Haemoglobin                        | Investigations                                 |

| Basis data for network                         |                                              |         |                                    |                                                                     |
|------------------------------------------------|----------------------------------------------|---------|------------------------------------|---------------------------------------------------------------------|
| SOC1                                           | AE1                                          | score   | AE2                                | SOC2                                                                |
| Skin and subcutaneous tissue disorders         | Skin fragility                               | 0.82131 | Anosmia                            | Nervous system disorders                                            |
| Endocrine disorders                            | Hypopituitarism                              | 0.82127 | Aortic aneurysm                    | Vascular disorders                                                  |
| Injury, poisoning and procedural complications | Tendon rupture                               | 0.82125 | Adrenocortical insufficiency acute | Endocrine disorders                                                 |
| Congenital, familial and genetic disorders     | Tourette's disorder                          | 0.82123 | Asphyxia                           | Respiratory, thoracic and mediastinal disorders                     |
| Investigations                                 | Blood follicle stimulating hormone decreased | 0.82123 | Extensor plantar response          | Nervous system disorders                                            |
| Gastrointestinal disorders                     | Anal inflammation                            | 0.82122 | Cataract congenital                | Congenital, familial and genetic disorders                          |
| Congenital, familial and genetic disorders     | Tooth discolouration congenital              | 0.82122 | Anal inflammation                  | Gastrointestinal disorders                                          |
| Investigations                                 | Blood growth hormone increased               | 0.82116 | Infertility                        | Reproductive system and breast disorders                            |
| Blood and lymphatic system disorders           | Polycythaemia                                | 0.82113 | Alkalosis hypokalaemic             | Metabolism and nutrition disorders                                  |
| Investigations                                 | Blood uric acid                              | 0.82096 | Sweat discolouration               | Skin and subcutaneous tissue disorders                              |
| Gastrointestinal disorders                     | Gastritis alcoholic                          | 0.82096 | Sweat discolouration               | Skin and subcutaneous tissue disorders                              |
| Investigations                                 | Vitamin D decreased                          | 0.82096 | Sweat discolouration               | Skin and subcutaneous tissue disorders                              |
| Skin and subcutaneous tissue disorders         | Sweat discolouration                         | 0.82096 | Lung adenocarcinoma                | Neoplasms benign, malignant and unspecified (incl cysts and polyps) |
| Infections and infestations                    | Injection site abscess                       | 0.82094 | Aspiration                         | Respiratory, thoracic and mediastinal disorders                     |
| Psychiatric disorders                          | Bipolar I disorder                           | 0.82092 | Intermittent claudication          | Vascular disorders                                                  |
| Gastrointestinal disorders                     | Mesenteric occlusion                         | 0.82091 | Tongue injury                      | Injury, poisoning and procedural complications                      |
| Metabolism and nutrition disorders             | Fluid imbalance                              | 0.82089 | Cataract subcapsular               | Eye disorders                                                       |
| Eye disorders                                  | Conjunctival bleb                            | 0.82082 | Spinal compression fracture        | Injury, poisoning and procedural complications                      |
| Nervous system disorders                       | Status epilepticus                           | 0.82081 | Clumsiness                         | Nervous system disorders                                            |
| Endocrine disorders                            | Hypercorticism                               | 0.82073 | Alkalosis hypokalaemic             | Metabolism and nutrition disorders                                  |

| Basis data for network                          |                                      |         |                                |                                                 |
|-------------------------------------------------|--------------------------------------|---------|--------------------------------|-------------------------------------------------|
| SOC1                                            | AE1                                  | score   | AE2                            | SOC2                                            |
| Reproductive system and breast disorders        | Enlarged clitoris                    | 0.82071 | Blood gonadotrophin increased  | Investigations                                  |
| Nervous system disorders                        | Agnosia                              | 0.82071 | Retinoic acid syndrome         | Respiratory, thoracic and mediastinal disorders |
| Congenital, familial and genetic disorders      | Optic nerve hypoplasia               | 0.82071 | Agnosia                        | Nervous system disorders                        |
| Respiratory, thoracic and mediastinal disorders | Lower respiratory tract inflammation | 0.82071 | Agnosia                        | Nervous system disorders                        |
| Investigations                                  | White blood cells urine              | 0.82071 | Agnosia                        | Nervous system disorders                        |
| Congenital, familial and genetic disorders      | Thymus hypoplasia                    | 0.82071 | Agnosia                        | Nervous system disorders                        |
| Congenital, familial and genetic disorders      | Congenital great vessel anomaly      | 0.82071 | Agnosia                        | Nervous system disorders                        |
| Nervous system disorders                        | Agnosia                              | 0.82071 | Scrotal ulcer                  | Reproductive system and breast disorders        |
| Respiratory, thoracic and mediastinal disorders | Asthma exercise induced              | 0.82071 | Agnosia                        | Nervous system disorders                        |
| Nervous system disorders                        | Agnosia                              | 0.82071 | Acne fulminans                 | Skin and subcutaneous tissue disorders          |
| Congenital, familial and genetic disorders      | Hypertelorism of orbit               | 0.82071 | Agnosia                        | Nervous system disorders                        |
| Musculoskeletal and connective tissue disorders | Tendon calcification                 | 0.82071 | Agnosia                        | Nervous system disorders                        |
| Musculoskeletal and connective tissue disorders | Myopathy steroid                     | 0.82065 | Hypercorticism                 | Endocrine disorders                             |
| Skin and subcutaneous tissue disorders          | Piloerection                         | 0.82059 | Blood corticotrophin decreased | Investigations                                  |
| Infections and infestations                     | Carbuncle                            | 0.82050 | Acute stress disorder          | Psychiatric disorders                           |
| Psychiatric disorders                           | Acute stress disorder                | 0.82050 | Intestinal mass                | Gastrointestinal disorders                      |
| Psychiatric disorders                           | Acute stress disorder                | 0.82050 | Lip blister                    | Gastrointestinal disorders                      |
| Musculoskeletal and connective tissue disorders | Tendon disorder                      | 0.82048 | Chondropathy                   | Musculoskeletal and connective tissue disorders |
| Eye disorders                                   | Exophthalmos                         | 0.82045 | Peptic ulcer perforation       | Gastrointestinal disorders                      |
| Respiratory, thoracic and mediastinal disorders | Aspiration                           | 0.82044 | Cardiac output decreased       | Investigations                                  |

| Basis data for network                               |                                        |         |                               |                                          |
|------------------------------------------------------|----------------------------------------|---------|-------------------------------|------------------------------------------|
| SOC1                                                 | AE1                                    | score   | AE2                           | SOC2                                     |
| Cardiac disorders                                    | Cardiac asthma                         | 0.82038 | Heart sounds abnormal         | Investigations                           |
| Investigations                                       | Pulmonary arterial pressure increased  | 0.82038 | Mean cell volume abnormal     | Investigations                           |
| Investigations                                       | Pulmonary arterial pressure increased  | 0.82038 | Heart sounds abnormal         | Investigations                           |
| Investigations                                       | Mean cell volume abnormal              | 0.82038 | Cardiac asthma                | Cardiac disorders                        |
| Eye disorders                                        | Cataract subcapsular                   | 0.82034 | Body fat disorder             | Metabolism and nutrition disorders       |
| Musculoskeletal and connective tissue disorders      | Growth retardation                     | 0.82017 | Catabolic state               | Metabolism and nutrition disorders       |
| Renal and urinary disorders                          | Ureteral spasm                         | 0.82011 | Physical examination abnormal | Investigations                           |
| General disorders and administration site conditions | Impaired healing                       | 0.82008 | Corneal infection             | Infections and infestations              |
| Investigations                                       | Coombs test positive                   | 0.81996 | Relapsing fever               | Infections and infestations              |
| Infections and infestations                          | Oropharyngeal candidiasis              | 0.81995 | Heat rash                     | Skin and subcutaneous tissue disorders   |
| Gastrointestinal disorders                           | Peptic ulcer perforation               | 0.81986 | Panniculitis                  | Skin and subcutaneous tissue disorders   |
| Musculoskeletal and connective tissue disorders      | Growth retardation                     | 0.81975 | Skin hypopigmentation         | Skin and subcutaneous tissue disorders   |
| Musculoskeletal and connective tissue disorders      | Joint effusion                         | 0.81975 | Iron deficiency               | Metabolism and nutrition disorders       |
| Reproductive system and breast disorders             | Breast engorgement                     | 0.81959 | Tongue paralysis              | Nervous system disorders                 |
| Reproductive system and breast disorders             | Infertility                            | 0.81945 | Aspermia                      | Reproductive system and breast disorders |
| Blood and lymphatic system disorders                 | Polycythaemia                          | 0.81944 | Fat atrophy                   | Skin and subcutaneous tissue disorders   |
| Endocrine disorders                                  | Secondary adrenocortical insufficiency | 0.81935 | Polycythaemia                 | Blood and lymphatic system disorders     |
| Investigations                                       | Pancreatic enzymes decreased           | 0.81917 | Bladder stenosis              | Renal and urinary disorders              |
| Investigations                                       | Bile output decreased                  | 0.81917 | Pancreatic enzymes decreased  | Investigations                           |
| Investigations                                       | Cortisol free urine decreased          | 0.81914 | Ocular hypertension           | Eye disorders                            |



| Basis data for network                               |                                 |         |                                               |                                                      |
|------------------------------------------------------|---------------------------------|---------|-----------------------------------------------|------------------------------------------------------|
| SOC1                                                 | AE1                             | score   | AE2                                           | SOC2                                                 |
| Investigations                                       | Blood gonadotrophin increased   | 0.81913 | Virilism foetal                               | Congenital, familial and genetic disorders           |
| Investigations                                       | Nitrogen balance negative       | 0.81897 | Adrenal suppression                           | Endocrine disorders                                  |
| Investigations                                       | Lipids increased                | 0.81895 | Blood zinc decreased                          | Investigations                                       |
| Gastrointestinal disorders                           | Peptic ulcer                    | 0.81874 | Oesophagitis ulcerative                       | Gastrointestinal disorders                           |
| Skin and subcutaneous tissue disorders               | Skin striae                     | 0.81872 | Oropharyngeal candidiasis                     | Infections and infestations                          |
| Infections and infestations                          | Bacterial infection             | 0.81857 | Palmar-plantar erythrodysesthesia syndrome    | Skin and subcutaneous tissue disorders               |
| Musculoskeletal and connective tissue disorders      | Myopathy steroid                | 0.81834 | Polycythaemia                                 | Blood and lymphatic system disorders                 |
| Metabolism and nutrition disorders                   | Hypervitaminosis A              | 0.81832 | Pupillary disorder                            | Eye disorders                                        |
| Metabolism and nutrition disorders                   | Hypervitaminosis A              | 0.81832 | Extraocular muscle paresis                    | Eye disorders                                        |
| Metabolism and nutrition disorders                   | Hypervitaminosis A              | 0.81832 | Mean cell haemoglobin concentration increased | Investigations                                       |
| Investigations                                       | Mean cell haemoglobin decreased | 0.81832 | Hypervitaminosis A                            | Metabolism and nutrition disorders                   |
| Metabolism and nutrition disorders                   | Hypervitaminosis A              | 0.81832 | PCO2 increased                                | Investigations                                       |
| Metabolism and nutrition disorders                   | Hypervitaminosis A              | 0.81832 | Secretion discharge                           | General disorders and administration site conditions |
| Injury, poisoning and procedural complications       | Tendon rupture                  | 0.81831 | Hypopituitarism                               | Endocrine disorders                                  |
| Infections and infestations                          | Cryptococcosis                  | 0.81830 | Toxoplasmosis                                 | Infections and infestations                          |
| Endocrine disorders                                  | Hypothalamo-pituitary disorders | 0.81829 | Secondary adrenocortical insufficiency        | Endocrine disorders                                  |
| Injury, poisoning and procedural complications       | Spinal compression fracture     | 0.81821 | Polycythaemia                                 | Blood and lymphatic system disorders                 |
| General disorders and administration site conditions | Injection site hypersensitivity | 0.81819 | Megaloblasts increased                        | Investigations                                       |
| Vascular disorders                                   | Post thrombotic syndrome        | 0.81819 | Megaloblasts increased                        | Investigations                                       |
| Skin and subcutaneous tissue disorders               | Skin striae                     | 0.81818 | Hypopituitarism                               | Endocrine disorders                                  |

| Basis data for network                          |                                |         |                                                   |                                                      |
|-------------------------------------------------|--------------------------------|---------|---------------------------------------------------|------------------------------------------------------|
| SOC1                                            | AE1                            | score   | AE2                                               | SOC2                                                 |
| Skin and subcutaneous tissue disorders          | Yellow nail syndrome           | 0.81813 | Congenital cardiovascular anomaly                 | Congenital, familial and genetic disorders           |
| Skin and subcutaneous tissue disorders          | Hypohidrosis                   | 0.81813 | Cycloplegia                                       | Eye disorders                                        |
| Nervous system disorders                        | Anosmia                        | 0.81812 | Catabolic state                                   | Metabolism and nutrition disorders                   |
| Investigations                                  | Blood corticotrophin decreased | 0.81809 | Blood thyroid stimulating hormone decreased       | Investigations                                       |
| Blood and lymphatic system disorders            | Polycythaemia                  | 0.81808 | Cushingoid                                        | Endocrine disorders                                  |
| Psychiatric disorders                           | Orgasm abnormal                | 0.81807 | Spermatozoa progressive motility decreased        | Investigations                                       |
| Metabolism and nutrition disorders              | Glucose tolerance impaired     | 0.81807 | Skin depigmentation                               | Skin and subcutaneous tissue disorders               |
| Eye disorders                                   | Cycloplegia                    | 0.81803 | Incoherent                                        | Nervous system disorders                             |
| Vascular disorders                              | Aortic aneurysm                | 0.81792 | Large intestine perforation                       | Gastrointestinal disorders                           |
| Eye disorders                                   | Optic neuropathy               | 0.81788 | Hypopituitarism                                   | Endocrine disorders                                  |
| Skin and subcutaneous tissue disorders          | Fat atrophy                    | 0.81782 | Gastroduodenal ulcer                              | Gastrointestinal disorders                           |
| Skin and subcutaneous tissue disorders          | Acantholysis                   | 0.81780 | Serositis                                         | General disorders and administration site conditions |
| Investigations                                  | Vitamin B1 decreased           | 0.81779 | Left ventricular end-diastolic pressure decreased | Investigations                                       |
| Infections and infestations                     | Corneal infection              | 0.81778 | Polycythaemia                                     | Blood and lymphatic system disorders                 |
| Endocrine disorders                             | Virilism                       | 0.81778 | Glucose tolerance impaired                        | Metabolism and nutrition disorders                   |
| Reproductive system and breast disorders        | Enlarged clitoris              | 0.81771 | Epiphyses premature fusion                        | Musculoskeletal and connective tissue disorders      |
| Respiratory, thoracic and mediastinal disorders | Pulmonary mass                 | 0.81764 | Acoustic stimulation tests abnormal               | Investigations                                       |
| Respiratory, thoracic and mediastinal disorders | Nasal septum ulceration        | 0.81762 | Myringitis                                        | Infections and infestations                          |
| Respiratory, thoracic and mediastinal disorders | Nasal septum ulceration        | 0.81762 | Pharyngeal candidiasis                            | Infections and infestations                          |
| Respiratory, thoracic and mediastinal disorders | Nasal septum ulceration        | 0.81762 | Eczema infected                                   | Infections and infestations                          |

| Basis data for network                                              |                                    |         |                                  |                                                      |
|---------------------------------------------------------------------|------------------------------------|---------|----------------------------------|------------------------------------------------------|
| SOC1                                                                | AE1                                | score   | AE2                              | SOC2                                                 |
| Respiratory, thoracic and mediastinal disorders                     | Nasal septum ulceration            | 0.81762 | Herpetic stomatitis              | Infections and infestations                          |
| Infections and infestations                                         | Fungal oesophagitis                | 0.81762 | Nasal septum ulceration          | Respiratory, thoracic and mediastinal disorders      |
| Ear and labyrinth disorders                                         | Aural polyp                        | 0.81762 | Nasal septum ulceration          | Respiratory, thoracic and mediastinal disorders      |
| Respiratory, thoracic and mediastinal disorders                     | Pharyngeal polyp                   | 0.81762 | Nasal septum ulceration          | Respiratory, thoracic and mediastinal disorders      |
| Investigations                                                      | Creatinine urine decreased         | 0.81762 | Nasal septum ulceration          | Respiratory, thoracic and mediastinal disorders      |
| Endocrine disorders                                                 | Adrenocortical insufficiency acute | 0.81762 | Skin hypopigmentation            | Skin and subcutaneous tissue disorders               |
| Immune system disorders                                             | Immunosuppression                  | 0.81755 | Cushingoid                       | Endocrine disorders                                  |
| Gastrointestinal disorders                                          | Gastrointestinal motility disorder | 0.81742 | Blood corticotrophin decreased   | Investigations                                       |
| Eye disorders                                                       | Exophthalmos                       | 0.81738 | Hypertrophic cardiomyopathy      | Cardiac disorders                                    |
| Skin and subcutaneous tissue disorders                              | Panniculitis                       | 0.81731 | Eye inflammation                 | Eye disorders                                        |
| Investigations                                                      | HIV test positive                  | 0.81727 | Specific gravity urine decreased | Investigations                                       |
| Respiratory, thoracic and mediastinal disorders                     | Laryngeal disorder                 | 0.81720 | Ejaculation failure              | Reproductive system and breast disorders             |
| Eye disorders                                                       | Corneal degeneration               | 0.81719 | Goitre congenital                | Congenital, familial and genetic disorders           |
| Endocrine disorders                                                 | Adrenal suppression                | 0.81708 | Injection site abscess sterile   | General disorders and administration site conditions |
| Ear and labyrinth disorders                                         | Deafness permanent                 | 0.81705 | Neuromuscular blockade           | Nervous system disorders                             |
| General disorders and administration site conditions                | Microlithiasis                     | 0.81699 | Antibody test positive           | Investigations                                       |
| Endocrine disorders                                                 | Pituitary haemorrhage              | 0.81699 | Antibody test positive           | Investigations                                       |
| Neoplasms benign, malignant and unspecified (incl cysts and polyps) | Biliary neoplasm                   | 0.81699 | Antibody test positive           | Investigations                                       |
| Neoplasms benign, malignant and unspecified (incl cysts and polyps) | Bladder papilloma                  | 0.81699 | Antibody test positive           | Investigations                                       |
| Infections and infestations                                         | Renal abscess                      | 0.81699 | Antibody test positive           | Investigations                                       |

| Basis data for network                                              |                                            |         |                                              |                                                      |
|---------------------------------------------------------------------|--------------------------------------------|---------|----------------------------------------------|------------------------------------------------------|
| SOC1                                                                | AE1                                        | score   | AE2                                          | SOC2                                                 |
| Hepatobiliary disorders                                             | Biliary dilatation                         | 0.81699 | Antibody test positive                       | Investigations                                       |
| Gastrointestinal disorders                                          | Defaecation urgency                        | 0.81698 | Rhinalgia                                    | Respiratory, thoracic and mediastinal disorders      |
| Eye disorders                                                       | Cataract subcapsular                       | 0.81693 | Urine calcium increased                      | Investigations                                       |
| Nervous system disorders                                            | Anosmia                                    | 0.81690 | Spinal compression fracture                  | Injury, poisoning and procedural complications       |
| Congenital, familial and genetic disorders                          | Porphyria                                  | 0.81690 | Blood homocysteine increased                 | Investigations                                       |
| Investigations                                                      | ECG signs of myocardial ischaemia          | 0.81688 | Negative cardiac inotropic effect            | General disorders and administration site conditions |
| Neoplasms benign, malignant and unspecified (incl cysts and polyps) | Pyogenic granuloma                         | 0.81687 | Sticky skin                                  | Skin and subcutaneous tissue disorders               |
| Musculoskeletal and connective tissue disorders                     | Scoliosis                                  | 0.81678 | Impaired healing                             | General disorders and administration site conditions |
| Eye disorders                                                       | Posterior capsule opacification            | 0.81678 | Impaired healing                             | General disorders and administration site conditions |
| Respiratory, thoracic and mediastinal disorders                     | Nasal mucosa atrophy                       | 0.81678 | Impaired healing                             | General disorders and administration site conditions |
| Eye disorders                                                       | Scleromalacia                              | 0.81678 | Impaired healing                             | General disorders and administration site conditions |
| Respiratory, thoracic and mediastinal disorders                     | Laryngeal obstruction                      | 0.81678 | Impaired healing                             | General disorders and administration site conditions |
| Eye disorders                                                       | Chorioretinopathy                          | 0.81678 | Impaired healing                             | General disorders and administration site conditions |
| General disorders and administration site conditions                | Impaired healing                           | 0.81678 | Tendon injury                                | Injury, poisoning and procedural complications       |
| General disorders and administration site conditions                | Impaired healing                           | 0.81678 | Blood chromium decreased                     | Investigations                                       |
| Skin and subcutaneous tissue disorders                              | Palmar-plantar erythrodysesthesia syndrome | 0.81677 | Blood follicle stimulating hormone increased | Investigations                                       |
| Congenital, familial and genetic disorders                          | Tourette's disorder                        | 0.81673 | Breast engorgement                           | Reproductive system and breast disorders             |
| Eye disorders                                                       | Conjunctivitis allergic                    | 0.81672 | Cerebral venous thrombosis                   | Nervous system disorders                             |
| Skin and subcutaneous tissue disorders                              | Skin depigmentation                        | 0.81664 | Urine calcium increased                      | Investigations                                       |
| Skin and subcutaneous tissue disorders                              | Leukoderma                                 | 0.81655 | Growth retardation                           | Musculoskeletal and connective tissue disorders      |

| Basis data for network                               |                                            |         |                                 |                                                      |
|------------------------------------------------------|--------------------------------------------|---------|---------------------------------|------------------------------------------------------|
| SOC1                                                 | AE1                                        | score   | AE2                             | SOC2                                                 |
| Endocrine disorders                                  | Hypercorticism                             | 0.81653 | Conjunctival bleb               | Eye disorders                                        |
| Cardiac disorders                                    | Myocardial rupture                         | 0.81650 | Oropharyngitis fungal           | Infections and infestations                          |
| Investigations                                       | Spermatozoa progressive motility decreased | 0.81648 | Platelet aggregation increased  | Investigations                                       |
| Infections and infestations                          | Relapsing fever                            | 0.81641 | Platelet function test abnormal | Investigations                                       |
| Eye disorders                                        | Eye inflammation                           | 0.81641 | Hip fracture                    | Injury, poisoning and procedural complications       |
| General disorders and administration site conditions | Injection site rash                        | 0.81638 | Joint effusion                  | Musculoskeletal and connective tissue disorders      |
| Musculoskeletal and connective tissue disorders      | Extremity contracture                      | 0.81634 | Hyperoxalaemia                  | Metabolism and nutrition disorders                   |
| Metabolism and nutrition disorders                   | Hypercatabolism                            | 0.81631 | Virilism                        | Endocrine disorders                                  |
| Skin and subcutaneous tissue disorders               | Leukoderma                                 | 0.81625 | Nitrogen balance negative       | Investigations                                       |
| Immune system disorders                              | Immunosuppression                          | 0.81623 | Alkalosis hypokalaemic          | Metabolism and nutrition disorders                   |
| Cardiac disorders                                    | Hypertrophic cardiomyopathy                | 0.81619 | Body fat disorder               | Metabolism and nutrition disorders                   |
| Skin and subcutaneous tissue disorders               | Leukoderma                                 | 0.81613 | Immunosuppression               | Immune system disorders                              |
| Skin and subcutaneous tissue disorders               | Skin atrophy                               | 0.81612 | Impaired healing                | General disorders and administration site conditions |
| Gastrointestinal disorders                           | Pylorospasm                                | 0.81610 | Optic ischaemic neuropathy      | Eye disorders                                        |
| Investigations                                       | Acoustic stimulation tests abnormal        | 0.81608 | Mononeuropathy multiplex        | Nervous system disorders                             |
| Investigations                                       | Pregnancy test false positive              | 0.81592 | Oculogyration                   | Eye disorders                                        |
| Nervous system disorders                             | Myotonia                                   | 0.81590 | Acute myocardial infarction     | Cardiac disorders                                    |
| Musculoskeletal and connective tissue disorders      | Neuropathic arthropathy                    | 0.81555 | Grey syndrome neonatal          | Cardiac disorders                                    |
| Nervous system disorders                             | Choreoathetosis                            | 0.81550 | Meige's syndrome                | Nervous system disorders                             |
| Immune system disorders                              | Antiphospholipid syndrome                  | 0.81550 | Choreoathetosis                 | Nervous system disorders                             |

| Basis data for network                          |                             |         |                              |                                                      |
|-------------------------------------------------|-----------------------------|---------|------------------------------|------------------------------------------------------|
| SOC1                                            | AE1                         | score   | AE2                          | SOC2                                                 |
| Investigations                                  | Retinogram abnormal         | 0.81546 | Blighted ovum                | Pregnancy, puerperium and perinatal conditions       |
| Metabolism and nutrition disorders              | Glucose tolerance impaired  | 0.81544 | Hypertrophic cardiomyopathy  | Cardiac disorders                                    |
| Injury, poisoning and procedural complications  | Tendon rupture              | 0.81536 | Skin fragility               | Skin and subcutaneous tissue disorders               |
| Injury, poisoning and procedural complications  | Spinal fracture             | 0.81535 | Impaired healing             | General disorders and administration site conditions |
| Blood and lymphatic system disorders            | Hypercoagulation            | 0.81527 | Optic neuropathy             | Eye disorders                                        |
| Injury, poisoning and procedural complications  | Spinal compression fracture | 0.81527 | Hypercorticism               | Endocrine disorders                                  |
| Infections and infestations                     | Fungal sepsis               | 0.81526 | CD4 lymphocytes decreased    | Investigations                                       |
| Investigations                                  | CD4 lymphocytes decreased   | 0.81526 | Cardiac ventricular disorder | Cardiac disorders                                    |
| Infections and infestations                     | Pneumonia fungal            | 0.81526 | CD4 lymphocytes decreased    | Investigations                                       |
| Nervous system disorders                        | Cerebral disorder           | 0.81523 | Urine glucose false positive | Investigations                                       |
| Skin and subcutaneous tissue disorders          | Vasculitic rash             | 0.81506 | Bone formation decreased     | Musculoskeletal and connective tissue disorders      |
| Investigations                                  | Megakaryocytes decreased    | 0.81503 | Glomerular vascular disorder | Renal and urinary disorders                          |
| Vascular disorders                              | Microangiopathy             | 0.81503 | Megakaryocytes decreased     | Investigations                                       |
| Investigations                                  | Megakaryocytes decreased    | 0.81503 | Cardiomyopathy neonatal      | Cardiac disorders                                    |
| Investigations                                  | Megakaryocytes decreased    | 0.81503 | Epstein-Barr virus infection | Infections and infestations                          |
| Investigations                                  | Megakaryocytes decreased    | 0.81503 | Monoparesis                  | Nervous system disorders                             |
| Renal and urinary disorders                     | Urge incontinence           | 0.81503 | Megakaryocytes decreased     | Investigations                                       |
| Respiratory, thoracic and mediastinal disorders | Brain hypoxia               | 0.81503 | Megakaryocytes decreased     | Investigations                                       |
| Investigations                                  | Megakaryocytes decreased    | 0.81503 | Gastroesophagitis            | Gastrointestinal disorders                           |
| Investigations                                  | Megakaryocytes decreased    | 0.81503 | Arteriopathic disease        | Vascular disorders                                   |

| Basis data for network                         |                                     |         |                                     |                                                      |
|------------------------------------------------|-------------------------------------|---------|-------------------------------------|------------------------------------------------------|
| SOC1                                           | AE1                                 | score   | AE2                                 | SOC2                                                 |
| Gastrointestinal disorders                     | Pancreatic pseudocyst               | 0.81503 | Megakaryocytes decreased            | Investigations                                       |
| Infections and infestations                    | Bullous impetigo                    | 0.81503 | Megakaryocytes decreased            | Investigations                                       |
| Investigations                                 | Megakaryocytes decreased            | 0.81503 | Locked-in syndrome                  | Nervous system disorders                             |
| Investigations                                 | Megakaryocytes decreased            | 0.81503 | Diabetes mellitus insulin-dependent | Metabolism and nutrition disorders                   |
| Injury, poisoning and procedural complications | Tongue injury                       | 0.81502 | Tongue spasm                        | Gastrointestinal disorders                           |
| Gastrointestinal disorders                     | Mesenteric occlusion                | 0.81500 | Fibrosis                            | General disorders and administration site conditions |
| Metabolism and nutrition disorders             | Catabolic state                     | 0.81490 | Hypercorticism                      | Endocrine disorders                                  |
| Blood and lymphatic system disorders           | Hypercoagulation                    | 0.81486 | Injection site abscess sterile      | General disorders and administration site conditions |
| Nervous system disorders                       | Anosmia                             | 0.81485 | Alkalosis hypokalaemic              | Metabolism and nutrition disorders                   |
| Gastrointestinal disorders                     | Reflux oesophagitis                 | 0.81478 | Skin warm                           | Skin and subcutaneous tissue disorders               |
| Skin and subcutaneous tissue disorders         | Leukoderma                          | 0.81472 | Impaired healing                    | General disorders and administration site conditions |
| Skin and subcutaneous tissue disorders         | Skin maceration                     | 0.81458 | Oropharyngeal candidiasis           | Infections and infestations                          |
| Infections and infestations                    | Encephalitis herpes                 | 0.81457 | Blood luteinising hormone decreased | Investigations                                       |
| Investigations                                 | Blood luteinising hormone decreased | 0.81457 | Blood oestrogen increased           | Investigations                                       |
| Metabolism and nutrition disorders             | Alkalosis hypokalaemic              | 0.81455 | Optic neuropathy                    | Eye disorders                                        |
| Gastrointestinal disorders                     | Dental discomfort                   | 0.81451 | Vasculitic rash                     | Skin and subcutaneous tissue disorders               |
| Eye disorders                                  | Exophthalmos                        | 0.81448 | Catabolic state                     | Metabolism and nutrition disorders                   |
| Nervous system disorders                       | Cerebellar artery occlusion         | 0.81447 | Acute left ventricular failure      | Cardiac disorders                                    |
| Nervous system disorders                       | Cerebellar artery occlusion         | 0.81447 | Superior sagittal sinus thrombosis  | Nervous system disorders                             |
| Nervous system disorders                       | Cerebellar artery occlusion         | 0.81447 | Cerebrospinal fluid rhinorrhoea     | Nervous system disorders                             |

| Basis data for network                               |                                        |         |                                |                                                      |
|------------------------------------------------------|----------------------------------------|---------|--------------------------------|------------------------------------------------------|
| SOC1                                                 | AE1                                    | score   | AE2                            | SOC2                                                 |
| Skin and subcutaneous tissue disorders               | Skin atrophy                           | 0.81444 | Injection site abscess sterile | General disorders and administration site conditions |
| Reproductive system and breast disorders             | Priapism                               | 0.81440 | Tardive dyskinesia             | Nervous system disorders                             |
| Musculoskeletal and connective tissue disorders      | Muscle fibrosis                        | 0.81437 | Anticholinergic syndrome       | Nervous system disorders                             |
| Endocrine disorders                                  | Cushingoid                             | 0.81424 | Muscle atrophy                 | Musculoskeletal and connective tissue disorders      |
| Congenital, familial and genetic disorders           | Microcephaly                           | 0.81416 | Carotid artery disease         | Nervous system disorders                             |
| General disorders and administration site conditions | Injection site abscess sterile         | 0.81408 | Hypercorticism                 | Endocrine disorders                                  |
| Investigations                                       | Cells in urine                         | 0.81407 | Carotene decreased             | Investigations                                       |
| Gastrointestinal disorders                           | Salivary gland calculus                | 0.81407 | Tongue geographic              | Gastrointestinal disorders                           |
| Gastrointestinal disorders                           | Tongue geographic                      | 0.81407 | Tooth loss                     | Gastrointestinal disorders                           |
| Gastrointestinal disorders                           | Tooth deposit                          | 0.81407 | Tongue geographic              | Gastrointestinal disorders                           |
| Injury, poisoning and procedural complications       | Spinal fracture                        | 0.81406 | Osteonecrosis                  | Musculoskeletal and connective tissue disorders      |
| Investigations                                       | Urine calcium increased                | 0.81396 | Gastrointestinal ulcer         | Gastrointestinal disorders                           |
| Metabolism and nutrition disorders                   | Body fat disorder                      | 0.81394 | Fluid imbalance                | Metabolism and nutrition disorders                   |
| Immune system disorders                              | Serum sickness                         | 0.81393 | Relapsing fever                | Infections and infestations                          |
| Nervous system disorders                             | Cerebral venous thrombosis             | 0.81389 | Injection site abscess sterile | General disorders and administration site conditions |
| Investigations                                       | Urine potassium increased              | 0.81380 | Haemorrhagic disorder          | Blood and lymphatic system disorders                 |
| Nervous system disorders                             | Anosmia                                | 0.81378 | Tendon rupture                 | Injury, poisoning and procedural complications       |
| Endocrine disorders                                  | Secondary adrenocortical insufficiency | 0.81361 | Immunosuppression              | Immune system disorders                              |
| Endocrine disorders                                  | Cushingoid                             | 0.81360 | Optic neuropathy               | Eye disorders                                        |
| Infections and infestations                          | Systemic candida                       | 0.81356 | Enterococcal infection         | Infections and infestations                          |



| Basis data for network                                              |                                 |         |                                       |                                                                     |
|---------------------------------------------------------------------|---------------------------------|---------|---------------------------------------|---------------------------------------------------------------------|
| SOC1                                                                | AE1                             | score   | AE2                                   | SOC2                                                                |
| Investigations                                                      | Hepatic enzyme                  | 0.81356 | Enterococcal infection                | Infections and infestations                                         |
| Infections and infestations                                         | Enterococcal bacteraemia        | 0.81356 | Enterococcal infection                | Infections and infestations                                         |
| Infections and infestations                                         | Enterococcal infection          | 0.81356 | Bilirubin urine                       | Investigations                                                      |
| Infections and infestations                                         | Enterococcal infection          | 0.81356 | Bile duct cancer                      | Neoplasms benign, malignant and unspecified (incl cysts and polyps) |
| Infections and infestations                                         | Enterococcal infection          | 0.81356 | Infusion related reaction             | General disorders and administration site conditions                |
| Neoplasms benign, malignant and unspecified (incl cysts and polyps) | Metastases to lung              | 0.81356 | Enterococcal infection                | Infections and infestations                                         |
| Infections and infestations                                         | Enterococcal infection          | 0.81356 | Metastatic neoplasm                   | Neoplasms benign, malignant and unspecified (incl cysts and polyps) |
| Neoplasms benign, malignant and unspecified (incl cysts and polyps) | Adult T-cell lymphoma/leukaemia | 0.81356 | Enterococcal infection                | Infections and infestations                                         |
| Infections and infestations                                         | Enterococcal infection          | 0.81356 | Candida sepsis                        | Infections and infestations                                         |
| Investigations                                                      | White blood cell count          | 0.81356 | Enterococcal infection                | Infections and infestations                                         |
| Infections and infestations                                         | Enterococcal infection          | 0.81356 | Glucose tolerance test abnormal       | Investigations                                                      |
| Infections and infestations                                         | Disseminated tuberculosis       | 0.81356 | Enterococcal infection                | Infections and infestations                                         |
| Infections and infestations                                         | Enterococcal infection          | 0.81356 | Bacterial sepsis                      | Infections and infestations                                         |
| Infections and infestations                                         | Escherichia bacteraemia         | 0.81356 | Enterococcal infection                | Infections and infestations                                         |
| Infections and infestations                                         | Enterococcal infection          | 0.81356 | HIV infection                         | Infections and infestations                                         |
| Infections and infestations                                         | Pseudomonal sepsis              | 0.81356 | Enterococcal infection                | Infections and infestations                                         |
| Metabolism and nutrition disorders                                  | Hypercatabolism                 | 0.81354 | Large intestine perforation           | Gastrointestinal disorders                                          |
| Endocrine disorders                                                 | Virilism                        | 0.81350 | Injection site abscess sterile        | General disorders and administration site conditions                |
| Neoplasms benign, malignant and unspecified (incl cysts and polyps) | Vaginal cancer                  | 0.81345 | Estrogenic effect                     | Endocrine disorders                                                 |
| Endocrine disorders                                                 | Estrogenic effect               | 0.81345 | Adenosquamous carcinoma of the cervix | Neoplasms benign, malignant and unspecified (incl cysts and polyps) |

| Basis data for network                                              |                                        |         |                                        |                                                |
|---------------------------------------------------------------------|----------------------------------------|---------|----------------------------------------|------------------------------------------------|
| SOC1                                                                | AE1                                    | score   | AE2                                    | SOC2                                           |
| Investigations                                                      | Coagulation factor IX level increased  | 0.81345 | Estrogenic effect                      | Endocrine disorders                            |
| Reproductive system and breast disorders                            | Breast cyst                            | 0.81345 | Estrogenic effect                      | Endocrine disorders                            |
| Neoplasms benign, malignant and unspecified (incl cysts and polyps) | Colorectal cancer                      | 0.81345 | Estrogenic effect                      | Endocrine disorders                            |
| Investigations                                                      | Alpha-1 anti-trypsin increased         | 0.81345 | Estrogenic effect                      | Endocrine disorders                            |
| Neoplasms benign, malignant and unspecified (incl cysts and polyps) | Testis cancer                          | 0.81345 | Estrogenic effect                      | Endocrine disorders                            |
| Investigations                                                      | Ceruloplasmin increased                | 0.81345 | Estrogenic effect                      | Endocrine disorders                            |
| Investigations                                                      | Coagulation factor VII level increased | 0.81345 | Estrogenic effect                      | Endocrine disorders                            |
| Endocrine disorders                                                 | Estrogenic effect                      | 0.81345 | Coagulation factor XII level increased | Investigations                                 |
| Endocrine disorders                                                 | Estrogenic effect                      | 0.81345 | Plasminogen increased                  | Investigations                                 |
| Endocrine disorders                                                 | Estrogenic effect                      | 0.81345 | Coagulation factor X level increased   | Investigations                                 |
| Metabolism and nutrition disorders                                  | Catabolic state                        | 0.81339 | Conjunctivitis allergic                | Eye disorders                                  |
| Skin and subcutaneous tissue disorders                              | Skin atrophy                           | 0.81336 | Oropharyngeal candidiasis              | Infections and infestations                    |
| General disorders and administration site conditions                | General symptom                        | 0.81333 | Ocular hypertension                    | Eye disorders                                  |
| Investigations                                                      | Oestradiol decreased                   | 0.81332 | Femoral neck fracture                  | Injury, poisoning and procedural complications |
| Injury, poisoning and procedural complications                      | Spinal compression fracture            | 0.81331 | Optic neuropathy                       | Eye disorders                                  |
| Skin and subcutaneous tissue disorders                              | Skin depigmentation                    | 0.81325 | Cushingoid                             | Endocrine disorders                            |
| Eye disorders                                                       | Exophthalmos                           | 0.81314 | Large intestine perforation            | Gastrointestinal disorders                     |
| Injury, poisoning and procedural complications                      | Chemical cystitis                      | 0.81308 | Hepatic infarction                     | Hepatobiliary disorders                        |
| Congenital, familial and genetic disorders                          | Tourette's disorder                    | 0.81307 | Ejaculation failure                    | Reproductive system and breast disorders       |
| Endocrine disorders                                                 | Hypothalamo-pituitary disorders        | 0.81306 | Hypercorticism                         | Endocrine disorders                            |

| Basis data for network                                              |                                 |         |                                 |                                                                     |
|---------------------------------------------------------------------|---------------------------------|---------|---------------------------------|---------------------------------------------------------------------|
| SOC1                                                                | AE1                             | score   | AE2                             | SOC2                                                                |
| Endocrine disorders                                                 | Hypopituitarism                 | 0.81304 | Skin depigmentation             | Skin and subcutaneous tissue disorders                              |
| Gastrointestinal disorders                                          | Gastroduodenal ulcer            | 0.81303 | Hypercoagulation                | Blood and lymphatic system disorders                                |
| Gastrointestinal disorders                                          | Large intestine perforation     | 0.81301 | Myocardial rupture              | Cardiac disorders                                                   |
| Musculoskeletal and connective tissue disorders                     | Myopathy steroid                | 0.81297 | Immunosuppression               | Immune system disorders                                             |
| Investigations                                                      | Platelet aggregation increased  | 0.81295 | Breast engorgement              | Reproductive system and breast disorders                            |
| Eye disorders                                                       | Conjunctivitis allergic         | 0.81293 | Hip fracture                    | Injury, poisoning and procedural complications                      |
| Musculoskeletal and connective tissue disorders                     | Muscle atrophy                  | 0.81289 | Growth retardation              | Musculoskeletal and connective tissue disorders                     |
| Respiratory, thoracic and mediastinal disorders                     | Nasal septum perforation        | 0.81282 | General symptom                 | General disorders and administration site conditions                |
| Skin and subcutaneous tissue disorders                              | Male pattern baldness           | 0.81280 | Enlarged clitoris               | Reproductive system and breast disorders                            |
| Metabolism and nutrition disorders                                  | Hypercatabolism                 | 0.81270 | Body fat disorder               | Metabolism and nutrition disorders                                  |
| Skin and subcutaneous tissue disorders                              | Fat atrophy                     | 0.81266 | Tumour lysis syndrome           | Neoplasms benign, malignant and unspecified (incl cysts and polyps) |
| General disorders and administration site conditions                | Impaired healing                | 0.81253 | Hypertrophic cardiomyopathy     | Cardiac disorders                                                   |
| Congenital, familial and genetic disorders                          | Cataract congenital             | 0.81250 | Hyperphosphaturia               | Renal and urinary disorders                                         |
| Renal and urinary disorders                                         | Hyperphosphaturia               | 0.81250 | Tooth discolouration congenital | Congenital, familial and genetic disorders                          |
| Investigations                                                      | Coombs test positive            | 0.81247 | Coombs direct test positive     | Investigations                                                      |
| Eye disorders                                                       | Cataract subcapsular            | 0.81245 | Aortic aneurysm                 | Vascular disorders                                                  |
| Musculoskeletal and connective tissue disorders                     | Tendon calcification            | 0.81242 | Pyogenic granuloma              | Neoplasms benign, malignant and unspecified (incl cysts and polyps) |
| Neoplasms benign, malignant and unspecified (incl cysts and polyps) | Pyogenic granuloma              | 0.81242 | Thymus hypoplasia               | Congenital, familial and genetic disorders                          |
| Skin and subcutaneous tissue disorders                              | Acne fulminans                  | 0.81242 | Pyogenic granuloma              | Neoplasms benign, malignant and unspecified (incl cysts and polyps) |
| Congenital, familial and genetic disorders                          | Congenital great vessel anomaly | 0.81242 | Pyogenic granuloma              | Neoplasms benign, malignant and unspecified (incl cysts and polyps) |

| Basis data for network                                              |                                      |         |                                 |                                                                     |
|---------------------------------------------------------------------|--------------------------------------|---------|---------------------------------|---------------------------------------------------------------------|
| SOC1                                                                | AE1                                  | score   | AE2                             | SOC2                                                                |
| Reproductive system and breast disorders                            | Scrotal ulcer                        | 0.81242 | Pyogenic granuloma              | Neoplasms benign, malignant and unspecified (incl cysts and polyps) |
| Congenital, familial and genetic disorders                          | Optic nerve hypoplasia               | 0.81242 | Pyogenic granuloma              | Neoplasms benign, malignant and unspecified (incl cysts and polyps) |
| Respiratory, thoracic and mediastinal disorders                     | Lower respiratory tract inflammation | 0.81242 | Pyogenic granuloma              | Neoplasms benign, malignant and unspecified (incl cysts and polyps) |
| Investigations                                                      | White blood cells urine              | 0.81242 | Pyogenic granuloma              | Neoplasms benign, malignant and unspecified (incl cysts and polyps) |
| Neoplasms benign, malignant and unspecified (incl cysts and polyps) | Pyogenic granuloma                   | 0.81242 | Retinoic acid syndrome          | Respiratory, thoracic and mediastinal disorders                     |
| Neoplasms benign, malignant and unspecified (incl cysts and polyps) | Pyogenic granuloma                   | 0.81242 | Hypertelorism of orbit          | Congenital, familial and genetic disorders                          |
| Neoplasms benign, malignant and unspecified (incl cysts and polyps) | Pyogenic granuloma                   | 0.81242 | Asthma exercise induced         | Respiratory, thoracic and mediastinal disorders                     |
| Endocrine disorders                                                 | Adrenocortical insufficiency acute   | 0.81234 | Cushing's syndrome              | Endocrine disorders                                                 |
| Musculoskeletal and connective tissue disorders                     | Myopathy steroid                     | 0.81221 | Anosmia                         | Nervous system disorders                                            |
| Skin and subcutaneous tissue disorders                              | Skin hypopigmentation                | 0.81220 | Injection site abscess sterile  | General disorders and administration site conditions                |
| Nervous system disorders                                            | Cerebral venous thrombosis           | 0.81208 | Eye inflammation                | Eye disorders                                                       |
| Investigations                                                      | Blood chromium decreased             | 0.81207 | Hypothalamo-pituitary disorders | Endocrine disorders                                                 |
| Eye disorders                                                       | Chorioretinopathy                    | 0.81207 | Hypothalamo-pituitary disorders | Endocrine disorders                                                 |
| Musculoskeletal and connective tissue disorders                     | Scoliosis                            | 0.81207 | Hypothalamo-pituitary disorders | Endocrine disorders                                                 |
| Eye disorders                                                       | Scleromalacia                        | 0.81207 | Hypothalamo-pituitary disorders | Endocrine disorders                                                 |
| Respiratory, thoracic and mediastinal disorders                     | Nasal mucosa atrophy                 | 0.81207 | Hypothalamo-pituitary disorders | Endocrine disorders                                                 |
| Respiratory, thoracic and mediastinal disorders                     | Laryngeal obstruction                | 0.81207 | Hypothalamo-pituitary disorders | Endocrine disorders                                                 |
| Eye disorders                                                       | Posterior capsule opacification      | 0.81207 | Hypothalamo-pituitary disorders | Endocrine disorders                                                 |
| Injury, poisoning and procedural complications                      | Tendon injury                        | 0.81207 | Hypothalamo-pituitary disorders | Endocrine disorders                                                 |
| Investigations                                                      | Blood corticotrophin decreased       | 0.81201 | Ureteral spasm                  | Renal and urinary disorders                                         |

| Basis data for network                          |                                      |         |                                    |                                                                     |
|-------------------------------------------------|--------------------------------------|---------|------------------------------------|---------------------------------------------------------------------|
| SOC1                                            | AE1                                  | score   | AE2                                | SOC2                                                                |
| Investigations                                  | Platelet aggregation increased       | 0.81199 | Orgasm abnormal                    | Psychiatric disorders                                               |
| Congenital, familial and genetic disorders      | Virilism foetal                      | 0.81190 | Congenital endocrine anomaly       | Congenital, familial and genetic disorders                          |
| Nervous system disorders                        | Dystonia                             | 0.81185 | Akathisia                          | Nervous system disorders                                            |
| Investigations                                  | Blood alkaline phosphatase           | 0.81181 | Open angle glaucoma                | Eye disorders                                                       |
| Immune system disorders                         | Immunosuppression                    | 0.81170 | Spinal compression fracture        | Injury, poisoning and procedural complications                      |
| Blood and lymphatic system disorders            | Polycythaemia                        | 0.81170 | Adrenocortical insufficiency acute | Endocrine disorders                                                 |
| Injury, poisoning and procedural complications  | Hip fracture                         | 0.81168 | Tumour lysis syndrome              | Neoplasms benign, malignant and unspecified (incl cysts and polyps) |
| Cardiac disorders                               | Cardiac failure acute                | 0.81164 | Cardiac output                     | Investigations                                                      |
| Injury, poisoning and procedural complications  | Tendon rupture                       | 0.81151 | Injection site abscess sterile     | General disorders and administration site conditions                |
| Investigations                                  | Urine calcium increased              | 0.81151 | Optic neuropathy                   | Eye disorders                                                       |
| Musculoskeletal and connective tissue disorders | Chondropathy                         | 0.81132 | Idiosyncratic drug reaction        | General disorders and administration site conditions                |
| Infections and infestations                     | Mycobacterial infection              | 0.81131 | Anorexia nervosa                   | Psychiatric disorders                                               |
| Infections and infestations                     | Nocardiosis                          | 0.81131 | Mycobacterial infection            | Infections and infestations                                         |
| Infections and infestations                     | Mycobacterial infection              | 0.81131 | Amoebiasis                         | Infections and infestations                                         |
| Investigations                                  | Blood antidiuretic hormone increased | 0.81127 | Choreoathetosis                    | Nervous system disorders                                            |
| Musculoskeletal and connective tissue disorders | Osteosclerosis                       | 0.81126 | Lipomatosis                        | Metabolism and nutrition disorders                                  |
| Musculoskeletal and connective tissue disorders | Osteosclerosis                       | 0.81126 | Urinary sediment abnormal          | Investigations                                                      |
| Musculoskeletal and connective tissue disorders | Osteosclerosis                       | 0.81126 | Ultrasound kidney abnormal         | Investigations                                                      |
| Investigations                                  | Bile output decreased                | 0.81121 | Respiratory rate decreased         | Investigations                                                      |
| Investigations                                  | Respiratory rate decreased           | 0.81121 | Bladder stenosis                   | Renal and urinary disorders                                         |

| Basis data for network                                              |                                            |         |                                            |                                                                     |
|---------------------------------------------------------------------|--------------------------------------------|---------|--------------------------------------------|---------------------------------------------------------------------|
| SOC1                                                                | AE1                                        | score   | AE2                                        | SOC2                                                                |
| Gastrointestinal disorders                                          | Peptic ulcer perforation                   | 0.81118 | Growth retardation                         | Musculoskeletal and connective tissue disorders                     |
| Eye disorders                                                       | Exophthalmos                               | 0.81117 | Impaired healing                           | General disorders and administration site conditions                |
| Renal and urinary disorders                                         | Urethral syndrome                          | 0.81114 | Tooth infection                            | Infections and infestations                                         |
| Neoplasms benign, malignant and unspecified (incl cysts and polyps) | Cholesteatoma                              | 0.81114 | Tooth infection                            | Infections and infestations                                         |
| Infections and infestations                                         | Tooth infection                            | 0.81114 | Brain neoplasm malignant                   | Neoplasms benign, malignant and unspecified (incl cysts and polyps) |
| Infections and infestations                                         | Tooth infection                            | 0.81114 | Nasopharyngeal cancer                      | Neoplasms benign, malignant and unspecified (incl cysts and polyps) |
| Investigations                                                      | Volume blood decreased                     | 0.81108 | Blood pressure orthostatic abnormal        | Investigations                                                      |
| Investigations                                                      | Semen viscosity abnormal                   | 0.81108 | Volume blood decreased                     | Investigations                                                      |
| Eye disorders                                                       | Eye inflammation                           | 0.81102 | Fat atrophy                                | Skin and subcutaneous tissue disorders                              |
| Infections and infestations                                         | Hepatitis B                                | 0.81093 | Blood amylase decreased                    | Investigations                                                      |
| Investigations                                                      | Spermatozoa progressive motility decreased | 0.81091 | Acute respiratory failure                  | Respiratory, thoracic and mediastinal disorders                     |
| Musculoskeletal and connective tissue disorders                     | Myopathy steroid                           | 0.81087 | Optic neuropathy                           | Eye disorders                                                       |
| Congenital, familial and genetic disorders                          | Tourette's disorder                        | 0.81086 | Spermatozoa progressive motility decreased | Investigations                                                      |
| Reproductive system and breast disorders                            | Aspermia                                   | 0.81086 | Choreoathetosis                            | Nervous system disorders                                            |
| Skin and subcutaneous tissue disorders                              | Skin atrophy                               | 0.81084 | Skin depigmentation                        | Skin and subcutaneous tissue disorders                              |
| Gastrointestinal disorders                                          | Peptic ulcer perforation                   | 0.81069 | Hip fracture                               | Injury, poisoning and procedural complications                      |
| Nervous system disorders                                            | Areflexia                                  | 0.81064 | Aspiration                                 | Respiratory, thoracic and mediastinal disorders                     |
| Skin and subcutaneous tissue disorders                              | Panniculitis                               | 0.81063 | Immunosuppression                          | Immune system disorders                                             |
| Nervous system disorders                                            | Neuroleptic malignant syndrome             | 0.81061 | Facial spasm                               | Nervous system disorders                                            |
| Endocrine disorders                                                 | Secondary adrenocortical insufficiency     | 0.81060 | Hypercorticism                             | Endocrine disorders                                                 |

| Basis data for network                                              |                              |         |                                    |                                                                     |
|---------------------------------------------------------------------|------------------------------|---------|------------------------------------|---------------------------------------------------------------------|
| SOC1                                                                | AE1                          | score   | AE2                                | SOC2                                                                |
| Metabolism and nutrition disorders                                  | Impaired fasting glucose     | 0.81051 | Benign uterine neoplasm            | Neoplasms benign, malignant and unspecified (incl cysts and polyps) |
| Congenital, familial and genetic disorders                          | Intestinal atresia           | 0.81051 | Pulmonary malformation             | Congenital, familial and genetic disorders                          |
| Investigations                                                      | Bile duct pressure increased | 0.81047 | Pulmonary granuloma                | Respiratory, thoracic and mediastinal disorders                     |
| Infections and infestations                                         | Osteomyelitis                | 0.81041 | Panniculitis                       | Skin and subcutaneous tissue disorders                              |
| Psychiatric disorders                                               | Orgasm abnormal              | 0.81040 | Acute respiratory failure          | Respiratory, thoracic and mediastinal disorders                     |
| Metabolism and nutrition disorders                                  | Hypercatabolism              | 0.81037 | Urine calcium increased            | Investigations                                                      |
| Metabolism and nutrition disorders                                  | Podagra                      | 0.81035 | Diffuse alveolar damage            | Respiratory, thoracic and mediastinal disorders                     |
| Respiratory, thoracic and mediastinal disorders                     | Diffuse alveolar damage      | 0.81035 | Alkaptonuria                       | Congenital, familial and genetic disorders                          |
| Respiratory, thoracic and mediastinal disorders                     | Diffuse alveolar damage      | 0.81035 | Kussmaul respiration               | Respiratory, thoracic and mediastinal disorders                     |
| Investigations                                                      | Occult blood                 | 0.81035 | Diffuse alveolar damage            | Respiratory, thoracic and mediastinal disorders                     |
| Musculoskeletal and connective tissue disorders                     | Muscle atrophy               | 0.81024 | Corneal infection                  | Infections and infestations                                         |
| Neoplasms benign, malignant and unspecified (incl cysts and polyps) | Haemangioma of liver         | 0.80994 | Withdrawal bleed                   | Reproductive system and breast disorders                            |
| Injury, poisoning and procedural complications                      | Spinal fracture              | 0.80994 | Hypothalamo-pituitary disorders    | Endocrine disorders                                                 |
| Investigations                                                      | Urine calcium increased      | 0.80986 | Hypertrophic cardiomyopathy        | Cardiac disorders                                                   |
| Skin and subcutaneous tissue disorders                              | Leukoderma                   | 0.80982 | Eye inflammation                   | Eye disorders                                                       |
| Investigations                                                      | Visual acuity tests abnormal | 0.80980 | Adrenocortical insufficiency acute | Endocrine disorders                                                 |
| Psychiatric disorders                                               | Acute psychosis              | 0.80968 | Global amnesia                     | Nervous system disorders                                            |
| Skin and subcutaneous tissue disorders                              | Skin maceration              | 0.80959 | Adrenocortical insufficiency acute | Endocrine disorders                                                 |
| Eye disorders                                                       | Eye inflammation             | 0.80954 | Cataract subcapsular               | Eye disorders                                                       |
| Cardiac disorders                                                   | Diastolic dysfunction        | 0.80948 | Hepatic infarction                 | Hepatobiliary disorders                                             |

| Basis data for network                                              |                                      |         |                                             |                                                                     |
|---------------------------------------------------------------------|--------------------------------------|---------|---------------------------------------------|---------------------------------------------------------------------|
| SOC1                                                                | AE1                                  | score   | AE2                                         | SOC2                                                                |
| Neoplasms benign, malignant and unspecified (incl cysts and polyps) | Leiomyoma                            | 0.80947 | Tongue neoplasm malignant stage unspecified | Neoplasms benign, malignant and unspecified (incl cysts and polyps) |
| Neoplasms benign, malignant and unspecified (incl cysts and polyps) | Leiomyoma                            | 0.80947 | Dermoid cyst of ovary                       | Congenital, familial and genetic disorders                          |
| Respiratory, thoracic and mediastinal disorders                     | Acquired tracheo-oesophageal fistula | 0.80947 | Leiomyoma                                   | Neoplasms benign, malignant and unspecified (incl cysts and polyps) |
| Neoplasms benign, malignant and unspecified (incl cysts and polyps) | Leiomyoma                            | 0.80947 | Hepatoblastoma                              | Neoplasms benign, malignant and unspecified (incl cysts and polyps) |
| Neoplasms benign, malignant and unspecified (incl cysts and polyps) | Leiomyoma                            | 0.80947 | Glioblastoma multiforme                     | Neoplasms benign, malignant and unspecified (incl cysts and polyps) |
| Neoplasms benign, malignant and unspecified (incl cysts and polyps) | Leiomyoma                            | 0.80947 | Malignant hydatidiform mole                 | Neoplasms benign, malignant and unspecified (incl cysts and polyps) |
| Neoplasms benign, malignant and unspecified (incl cysts and polyps) | Leiomyoma                            | 0.80947 | Neurofibromatosis                           | Congenital, familial and genetic disorders                          |
| Congenital, familial and genetic disorders                          | Anal atresia                         | 0.80947 | Leiomyoma                                   | Neoplasms benign, malignant and unspecified (incl cysts and polyps) |
| Neoplasms benign, malignant and unspecified (incl cysts and polyps) | Leiomyoma                            | 0.80947 | Dwarfism                                    | Musculoskeletal and connective tissue disorders                     |
| Neoplasms benign, malignant and unspecified (incl cysts and polyps) | Choriocarcinoma                      | 0.80947 | Leiomyoma                                   | Neoplasms benign, malignant and unspecified (incl cysts and polyps) |
| Neoplasms benign, malignant and unspecified (incl cysts and polyps) | Prolactinoma                         | 0.80947 | Leiomyoma                                   | Neoplasms benign, malignant and unspecified (incl cysts and polyps) |
| Neoplasms benign, malignant and unspecified (incl cysts and polyps) | Leiomyoma                            | 0.80947 | Pituitary tumour                            | Neoplasms benign, malignant and unspecified (incl cysts and polyps) |
| Congenital, familial and genetic disorders                          | Congenital joint malformation        | 0.80947 | Leiomyoma                                   | Neoplasms benign, malignant and unspecified (incl cysts and polyps) |
| Neoplasms benign, malignant and unspecified (incl cysts and polyps) | Leiomyoma                            | 0.80947 | Phosphenes                                  | Eye disorders                                                       |
| Respiratory, thoracic and mediastinal disorders                     | Hypocapnia                           | 0.80943 | Breath holding                              | Psychiatric disorders                                               |
| Gastrointestinal disorders                                          | Large intestine perforation          | 0.80934 | Muscle atrophy                              | Musculoskeletal and connective tissue disorders                     |



| Basis data for network                         |                               |         |                          |                                                 |
|------------------------------------------------|-------------------------------|---------|--------------------------|-------------------------------------------------|
| SOC1                                           | AE1                           | score   | AE2                      | SOC2                                            |
| Skin and subcutaneous tissue disorders         | Skin striae                   | 0.80933 | Corneal infection        | Infections and infestations                     |
| Reproductive system and breast disorders       | Retrograde ejaculation        | 0.80931 | Infertility              | Reproductive system and breast disorders        |
| Injury, poisoning and procedural complications | Spinal fracture               | 0.80929 | Conjunctivitis allergic  | Eye disorders                                   |
| Investigations                                 | Cortisol free urine decreased | 0.80927 | Nasal septum perforation | Respiratory, thoracic and mediastinal disorders |

| Basis data for network                                              |                                |         |                              |                                                      |
|---------------------------------------------------------------------|--------------------------------|---------|------------------------------|------------------------------------------------------|
| SOC1                                                                | AE1                            | score   | AE2                          | SOC2                                                 |
| General disorders and administration site conditions                | Injection site abscess sterile | 0.80924 | Hip fracture                 | Injury, poisoning and procedural complications       |
| Cardiac disorders                                                   | Myocardial rupture             | 0.80921 | Skin maceration              | Skin and subcutaneous tissue disorders               |
| Psychiatric disorders                                               | Tearfulness                    | 0.80912 | Sleep talking                | Nervous system disorders                             |
| Nervous system disorders                                            | Sleep talking                  | 0.80912 | Loss of control of legs      | General disorders and administration site conditions |
| Cardiac disorders                                                   | Acute myocardial infarction    | 0.80911 | Intermittent claudication    | Vascular disorders                                   |
| Metabolism and nutrition disorders                                  | Catabolic state                | 0.80907 | Impaired healing             | General disorders and administration site conditions |
| Eye disorders                                                       | Scleral thinning               | 0.80888 | Hypertrophic cardiomyopathy  | Cardiac disorders                                    |
| Nervous system disorders                                            | Extrapyramidal disorder        | 0.80887 | Tardive dyskinesia           | Nervous system disorders                             |
| Respiratory, thoracic and mediastinal disorders                     | Hypocapnia                     | 0.80885 | Pulse pressure abnormal      | Investigations                                       |
| Gastrointestinal disorders                                          | Large intestine perforation    | 0.80876 | Virilism                     | Endocrine disorders                                  |
| Neoplasms benign, malignant and unspecified (incl cysts and polyps) | Genitourinary tract neoplasm   | 0.80874 | Congenital endocrine anomaly | Congenital, familial and genetic disorders           |
| Respiratory, thoracic and mediastinal disorders                     | Nasal septum disorder          | 0.80870 | Herpetic stomatitis          | Infections and infestations                          |
| Infections and infestations                                         | Myringitis                     | 0.80870 | Nasal septum disorder        | Respiratory, thoracic and mediastinal disorders      |
| Respiratory, thoracic and mediastinal disorders                     | Nasal septum disorder          | 0.80870 | Pharyngeal polyp             | Respiratory, thoracic and mediastinal disorders      |
| Respiratory, thoracic and mediastinal disorders                     | Nasal septum disorder          | 0.80870 | Pharyngeal candidiasis       | Infections and infestations                          |
| Respiratory, thoracic and mediastinal disorders                     | Nasal septum disorder          | 0.80870 | Creatinine urine decreased   | Investigations                                       |
| Infections and infestations                                         | Fungal oesophagitis            | 0.80870 | Nasal septum disorder        | Respiratory, thoracic and mediastinal disorders      |
| Respiratory, thoracic and mediastinal disorders                     | Nasal septum disorder          | 0.80870 | Eczema infected              | Infections and infestations                          |
| Respiratory, thoracic and mediastinal disorders                     | Nasal septum disorder          | 0.80870 | Aural polyp                  | Ear and labyrinth disorders                          |
| Gastrointestinal disorders                                          | Pneumoperitoneum               | 0.80867 | Thyroxine decreased          | Investigations                                       |

| Basis data for network                               |                                               |         |                                          |                                                 |
|------------------------------------------------------|-----------------------------------------------|---------|------------------------------------------|-------------------------------------------------|
| SOC1                                                 | AE1                                           | score   | AE2                                      | SOC2                                            |
| Metabolism and nutrition disorders                   | Hypercatabolism                               | 0.80850 | Myocardial rupture                       | Cardiac disorders                               |
| Nervous system disorders                             | Metabolic encephalopathy                      | 0.80837 | Spinal osteoarthritis                    | Musculoskeletal and connective tissue disorders |
| Endocrine disorders                                  | Hypothalamo-pituitary disorders               | 0.80808 | Catabolic state                          | Metabolism and nutrition disorders              |
| Investigations                                       | Osteocalcin decreased                         | 0.80797 | Urine calcium/creatinine ratio decreased | Investigations                                  |
| Investigations                                       | Blood 1,25-dihydroxycholecalciferol increased | 0.80797 | Urine calcium/creatinine ratio decreased | Investigations                                  |
| Eye disorders                                        | Retinal vascular thrombosis                   | 0.80795 | Contact lens intolerance                 | Eye disorders                                   |
| Musculoskeletal and connective tissue disorders      | Muscle atrophy                                | 0.80791 | Hypertrophic cardiomyopathy              | Cardiac disorders                               |
| Investigations                                       | Visual acuity tests abnormal                  | 0.80790 | Disorder of globe                        | Eye disorders                                   |
| Injury, poisoning and procedural complications       | Bladder injury                                | 0.80790 | Soft tissue infection                    | Infections and infestations                     |
| Gastrointestinal disorders                           | Intestinal dilatation                         | 0.80782 | Choreoathetosis                          | Nervous system disorders                        |
| General disorders and administration site conditions | Application site discomfort                   | 0.80782 | Wegener's granulomatosis                 | Respiratory, thoracic and mediastinal disorders |
| Nervous system disorders                             | Motor dysfunction                             | 0.80775 | Antisocial behaviour                     | Psychiatric disorders                           |
| Eye disorders                                        | Optic neuropathy                              | 0.80775 | Fluid imbalance                          | Metabolism and nutrition disorders              |
| Psychiatric disorders                                | Orgasm abnormal                               | 0.80772 | Tongue paralysis                         | Nervous system disorders                        |
| Gastrointestinal disorders                           | Rectal perforation                            | 0.80768 | Retinopathy of prematurity               | Eye disorders                                   |
| Eye disorders                                        | Retinopathy of prematurity                    | 0.80768 | Joint destruction                        | Musculoskeletal and connective tissue disorders |
| Congenital, familial and genetic disorders           | Inborn error of metabolism                    | 0.80768 | Retinopathy of prematurity               | Eye disorders                                   |
| Investigations                                       | Urine osmolarity decreased                    | 0.80768 | Retinopathy of prematurity               | Eye disorders                                   |
| Musculoskeletal and connective tissue disorders      | Muscle atrophy                                | 0.80764 | Spinal fracture                          | Injury, poisoning and procedural complications  |
| Investigations                                       | Thrombin time prolonged                       | 0.80762 | Adrenal cortex atrophy                   | Endocrine disorders                             |

| Basis data for network                          |                                        |         |                                        |                                                      |
|-------------------------------------------------|----------------------------------------|---------|----------------------------------------|------------------------------------------------------|
| SOC1                                            | AE1                                    | score   | AE2                                    | SOC2                                                 |
| Gastrointestinal disorders                      | Large intestine perforation            | 0.80755 | Growth retardation                     | Musculoskeletal and connective tissue disorders      |
| Psychiatric disorders                           | Obsessive-compulsive disorder          | 0.80755 | Injection site abscess                 | Infections and infestations                          |
| Endocrine disorders                             | Cushingoid                             | 0.80743 | Anosmia                                | Nervous system disorders                             |
| Reproductive system and breast disorders        | Feminisation acquired                  | 0.80726 | Very low density lipoprotein decreased | Investigations                                       |
| Reproductive system and breast disorders        | Feminisation acquired                  | 0.80726 | Nipple exudate bloody                  | Reproductive system and breast disorders             |
| Reproductive system and breast disorders        | Feminisation acquired                  | 0.80726 | Injection site discolouration          | General disorders and administration site conditions |
| Reproductive system and breast disorders        | Feminisation acquired                  | 0.80726 | Vaginal cyst                           | Reproductive system and breast disorders             |
| Musculoskeletal and connective tissue disorders | Neuropathic arthropathy                | 0.80726 | Visual acuity tests abnormal           | Investigations                                       |
| Infections and infestations                     | Injection site abscess                 | 0.80724 | Asphyxia                               | Respiratory, thoracic and mediastinal disorders      |
| Infections and infestations                     | Sinusitis                              | 0.80720 | Pharyngitis                            | Infections and infestations                          |
| Investigations                                  | Nerve conduction studies abnormal      | 0.80713 | Optic disc disorder                    | Eye disorders                                        |
| Eye disorders                                   | Chorioretinal atrophy                  | 0.80713 | Nerve conduction studies abnormal      | Investigations                                       |
| Investigations                                  | Nerve conduction studies abnormal      | 0.80713 | Visual field tests abnormal            | Investigations                                       |
| Renal and urinary disorders                     | Glomerulonephritis rapidly progressive | 0.80709 | Choluria                               | Renal and urinary disorders                          |
| Renal and urinary disorders                     | Glomerulonephritis rapidly progressive | 0.80709 | Dysentery                              | Infections and infestations                          |
| Psychiatric disorders                           | Orgasmic sensation decreased           | 0.80709 | Hypochondriasis                        | Psychiatric disorders                                |
| Reproductive system and breast disorders        | Premature menopause                    | 0.80709 | Hypochondriasis                        | Psychiatric disorders                                |
| Psychiatric disorders                           | Hypochondriasis                        | 0.80709 | Obsessive thoughts                     | Psychiatric disorders                                |
| Metabolism and nutrition disorders              | Glucose tolerance impaired             | 0.80705 | Optic neuropathy                       | Eye disorders                                        |
| Investigations                                  | Glucose urine present                  | 0.80703 | Skin maceration                        | Skin and subcutaneous tissue disorders               |

| Basis data for network                               |                                 |         |                               |                                                 |
|------------------------------------------------------|---------------------------------|---------|-------------------------------|-------------------------------------------------|
| SOC1                                                 | AE1                             | score   | AE2                           | SOC2                                            |
| Endocrine disorders                                  | Hypopituitarism                 | 0.80691 | Immunosuppression             | Immune system disorders                         |
| Immune system disorders                              | Immunosuppression               | 0.80685 | Nitrogen balance negative     | Investigations                                  |
| Vascular disorders                                   | Aortic aneurysm                 | 0.80680 | Gastroduodenal ulcer          | Gastrointestinal disorders                      |
| Eye disorders                                        | Chorioretinopathy               | 0.80680 | Muscle atrophy                | Musculoskeletal and connective tissue disorders |
| Respiratory, thoracic and mediastinal disorders      | Nasal mucosa atrophy            | 0.80680 | Muscle atrophy                | Musculoskeletal and connective tissue disorders |
| Musculoskeletal and connective tissue disorders      | Scoliosis                       | 0.80680 | Muscle atrophy                | Musculoskeletal and connective tissue disorders |
| Eye disorders                                        | Scleromalacia                   | 0.80680 | Muscle atrophy                | Musculoskeletal and connective tissue disorders |
| Musculoskeletal and connective tissue disorders      | Muscle atrophy                  | 0.80680 | Tendon injury                 | Injury, poisoning and procedural complications  |
| Eye disorders                                        | Posterior capsule opacification | 0.80680 | Muscle atrophy                | Musculoskeletal and connective tissue disorders |
| Musculoskeletal and connective tissue disorders      | Muscle atrophy                  | 0.80680 | Laryngeal obstruction         | Respiratory, thoracic and mediastinal disorders |
| Investigations                                       | Blood chromium decreased        | 0.80680 | Muscle atrophy                | Musculoskeletal and connective tissue disorders |
| Gastrointestinal disorders                           | Gastroduodenal ulcer            | 0.80678 | Leukoderma                    | Skin and subcutaneous tissue disorders          |
| Blood and lymphatic system disorders                 | Polycythaemia                   | 0.80675 | Grey syndrome neonatal        | Cardiac disorders                               |
| Vascular disorders                                   | Arterial thrombosis limb        | 0.80674 | Basophil count abnormal       | Investigations                                  |
| General disorders and administration site conditions | Exercise tolerance decreased    | 0.80671 | Arterial insufficiency        | Vascular disorders                              |
| Eye disorders                                        | Exophthalmos                    | 0.80669 | Hypercatabolism               | Metabolism and nutrition disorders              |
| Skin and subcutaneous tissue disorders               | Skin atrophy                    | 0.80667 | Hypopituitarism               | Endocrine disorders                             |
| Nervous system disorders                             | Peripheral nerve palsy          | 0.80667 | Traumatic arthropathy         | Injury, poisoning and procedural complications  |
| General disorders and administration site conditions | Application site bruising       | 0.80665 | Endometrial atrophy           | Reproductive system and breast disorders        |
| Nervous system disorders                             | Neuroleptic malignant syndrome  | 0.80664 | Pregnancy test false positive | Investigations                                  |

| Basis data for network                          |                          |         |                                        |                                                 |
|-------------------------------------------------|--------------------------|---------|----------------------------------------|-------------------------------------------------|
| SOC1                                            | AE1                      | score   | AE2                                    | SOC2                                            |
| Musculoskeletal and connective tissue disorders | Joint effusion           | 0.80660 | Mean arterial pressure increased       | Investigations                                  |
| Musculoskeletal and connective tissue disorders | Osteonecrosis            | 0.80655 | Scoliosis                              | Musculoskeletal and connective tissue disorders |
| Musculoskeletal and connective tissue disorders | Osteonecrosis            | 0.80655 | Posterior capsule opacification        | Eye disorders                                   |
| Investigations                                  | Blood chromium decreased | 0.80655 | Osteonecrosis                          | Musculoskeletal and connective tissue disorders |
| Respiratory, thoracic and mediastinal disorders | Nasal mucosa atrophy     | 0.80655 | Osteonecrosis                          | Musculoskeletal and connective tissue disorders |
| Musculoskeletal and connective tissue disorders | Osteonecrosis            | 0.80655 | Tendon injury                          | Injury, poisoning and procedural complications  |
| Eye disorders                                   | Scleromalacia            | 0.80655 | Osteonecrosis                          | Musculoskeletal and connective tissue disorders |
| Respiratory, thoracic and mediastinal disorders | Laryngeal obstruction    | 0.80655 | Osteonecrosis                          | Musculoskeletal and connective tissue disorders |
| Musculoskeletal and connective tissue disorders | Osteonecrosis            | 0.80655 | Chorioretinopathy                      | Eye disorders                                   |
| Infections and infestations                     | Penile infection         | 0.80653 | Prothrombin time ratio abnormal        | Investigations                                  |
| Ear and labyrinth disorders                     | Ear congestion           | 0.80653 | Prothrombin time ratio abnormal        | Investigations                                  |
| Reproductive system and breast disorders        | Uterine perforation      | 0.80652 | Iris hyperpigmentation                 | Eye disorders                                   |
| Skin and subcutaneous tissue disorders          | Skin depigmentation      | 0.80646 | Hypothalamo-pituitary disorders        | Endocrine disorders                             |
| Eye disorders                                   | Optic neuropathy         | 0.80643 | Secondary adrenocortical insufficiency | Endocrine disorders                             |
| Gastrointestinal disorders                      | Dyskinesia oesophageal   | 0.80641 | Choreoathetosis                        | Nervous system disorders                        |
| Investigations                                  | Urine calcium increased  | 0.80637 | Peptic ulcer perforation               | Gastrointestinal disorders                      |
| Eye disorders                                   | Cataract subcapsular     | 0.80631 | Polycythaemia                          | Blood and lymphatic system disorders            |
| Investigations                                  | Cardiac output           | 0.80611 | Pancreatic fistula                     | Gastrointestinal disorders                      |
| Infections and infestations                     | Respiratory moniliasis   | 0.80611 | Cardiac output                         | Investigations                                  |
| Investigations                                  | Cardiac output           | 0.80611 | Peritoneal fibrosis                    | Gastrointestinal disorders                      |

| Basis data for network                                              |                                              |         |                                             |                                                      |
|---------------------------------------------------------------------|----------------------------------------------|---------|---------------------------------------------|------------------------------------------------------|
| SOC1                                                                | AE1                                          | score   | AE2                                         | SOC2                                                 |
| Investigations                                                      | Oestradiol decreased                         | 0.80610 | Application site bruising                   | General disorders and administration site conditions |
| Nervous system disorders                                            | Retrograde amnesia                           | 0.80605 | Cycloplegia                                 | Eye disorders                                        |
| Cardiac disorders                                                   | Grey syndrome neonatal                       | 0.80590 | Hypercorticism                              | Endocrine disorders                                  |
| Investigations                                                      | Blood follicle stimulating hormone increased | 0.80577 | Blood thyroid stimulating hormone increased | Investigations                                       |
| Eye disorders                                                       | Conjunctivitis allergic                      | 0.80576 | Grey syndrome neonatal                      | Cardiac disorders                                    |
| Investigations                                                      | Platelet aggregation increased               | 0.80575 | Tourette's disorder                         | Congenital, familial and genetic disorders           |
| Respiratory, thoracic and mediastinal disorders                     | Painful respiration                          | 0.80568 | Dyspnoea paroxysmal nocturnal               | Respiratory, thoracic and mediastinal disorders      |
| Reproductive system and breast disorders                            | Ejaculation failure                          | 0.80564 | Breast engorgement                          | Reproductive system and breast disorders             |
| Skin and subcutaneous tissue disorders                              | Skin hypopigmentation                        | 0.80563 | Glucose urine present                       | Investigations                                       |
| Psychiatric disorders                                               | Bipolar I disorder                           | 0.80561 | Acute myocardial infarction                 | Cardiac disorders                                    |
| Pregnancy, puerperium and perinatal conditions                      | Oligohydramnios                              | 0.80557 | Neonatal anuria                             | Renal and urinary disorders                          |
| Nervous system disorders                                            | Cerebral venous thrombosis                   | 0.80542 | Growth retardation                          | Musculoskeletal and connective tissue disorders      |
| Gastrointestinal disorders                                          | Aptalism                                     | 0.80541 | Meige's syndrome                            | Nervous system disorders                             |
| Immune system disorders                                             | Antiphospholipid syndrome                    | 0.80541 | Aptalism                                    | Gastrointestinal disorders                           |
| Gastrointestinal disorders                                          | Peptic ulcer perforation                     | 0.80541 | Body fat disorder                           | Metabolism and nutrition disorders                   |
| Gastrointestinal disorders                                          | Peptic ulcer perforation                     | 0.80539 | Hypercoagulation                            | Blood and lymphatic system disorders                 |
| Skin and subcutaneous tissue disorders                              | Lipohypertrophy                              | 0.80535 | Facial wasting                              | Metabolism and nutrition disorders                   |
| Infections and infestations                                         | Progressive multifocal leukoencephalopathy   | 0.80530 | Diarrhoea infectious                        | Infections and infestations                          |
| Neoplasms benign, malignant and unspecified (incl cysts and polyps) | Papilloma                                    | 0.80530 | Progressive multifocal leukoencephalopathy  | Infections and infestations                          |
| Infections and infestations                                         | Progressive multifocal leukoencephalopathy   | 0.80530 | Painful defaecation                         | Gastrointestinal disorders                           |

| Basis data for network                                              |                        |         |                                 |                                                      |
|---------------------------------------------------------------------|------------------------|---------|---------------------------------|------------------------------------------------------|
| SOC1                                                                | AE1                    | score   | AE2                             | SOC2                                                 |
| Metabolism and nutrition disorders                                  | Alkalosis hypokalaemic | 0.80529 | Gastroduodenal ulcer            | Gastrointestinal disorders                           |
| Cardiac disorders                                                   | Grey syndrome neonatal | 0.80524 | Anosmia                         | Nervous system disorders                             |
| Reproductive system and breast disorders                            | Aspermia               | 0.80521 | Tardive dyskinesia              | Nervous system disorders                             |
| Psychiatric disorders                                               | Orgasm abnormal        | 0.80516 | Neuroleptic malignant syndrome  | Nervous system disorders                             |
| Endocrine disorders                                                 | Hypercorticism         | 0.80513 | Neuropathic arthropathy         | Musculoskeletal and connective tissue disorders      |
| Eye disorders                                                       | Cataract subcapsular   | 0.80511 | Optic neuropathy                | Eye disorders                                        |
| Neoplasms benign, malignant and unspecified (incl cysts and polyps) | Tumour lysis syndrome  | 0.80511 | Large intestine perforation     | Gastrointestinal disorders                           |
| Cardiac disorders                                                   | Myocardial rupture     | 0.80509 | Growth retardation              | Musculoskeletal and connective tissue disorders      |
| General disorders and administration site conditions                | Bloody discharge       | 0.80508 | Penile pain                     | Reproductive system and breast disorders             |
| Reproductive system and breast disorders                            | Genital lesion         | 0.80508 | Nonspecific reaction            | General disorders and administration site conditions |
| Reproductive system and breast disorders                            | Penile pain            | 0.80508 | Nonspecific reaction            | General disorders and administration site conditions |
| Reproductive system and breast disorders                            | Genital lesion         | 0.80508 | Bloody discharge                | General disorders and administration site conditions |
| General disorders and administration site conditions                | Impaired healing       | 0.80505 | Grey syndrome neonatal          | Cardiac disorders                                    |
| Investigations                                                      | Total bile acids       | 0.80502 | Macular vasospasm               | Eye disorders                                        |
| Neoplasms benign, malignant and unspecified (incl cysts and polyps) | Tumour lysis syndrome  | 0.80502 | Urine calcium increased         | Investigations                                       |
| Respiratory, thoracic and mediastinal disorders                     | Laryngeal obstruction  | 0.80502 | Keratitis herpetic              | Infections and infestations                          |
| Infections and infestations                                         | Keratitis herpetic     | 0.80502 | Blood chromium decreased        | Investigations                                       |
| Infections and infestations                                         | Keratitis herpetic     | 0.80502 | Scoliosis                       | Musculoskeletal and connective tissue disorders      |
| Infections and infestations                                         | Keratitis herpetic     | 0.80502 | Posterior capsule opacification | Eye disorders                                        |
| Infections and infestations                                         | Keratitis herpetic     | 0.80502 | Scleromalacia                   | Eye disorders                                        |



| Basis data for network                               |                           |         |                                    |                                                      |
|------------------------------------------------------|---------------------------|---------|------------------------------------|------------------------------------------------------|
| SOC1                                                 | AE1                       | score   | AE2                                | SOC2                                                 |
| Infections and infestations                          | Keratitis herpetic        | 0.80502 | Chorioretinopathy                  | Eye disorders                                        |
| Injury, poisoning and procedural complications       | Tendon injury             | 0.80502 | Keratitis herpetic                 | Infections and infestations                          |
| Respiratory, thoracic and mediastinal disorders      | Nasal mucosa atrophy      | 0.80502 | Keratitis herpetic                 | Infections and infestations                          |
| Investigations                                       | Glucocorticoids increased | 0.80497 | Application site atrophy           | General disorders and administration site conditions |
| Eye disorders                                        | Conjunctivitis allergic   | 0.80487 | Corneal infection                  | Infections and infestations                          |
| Endocrine disorders                                  | Adrenal suppression       | 0.80481 | Fluid imbalance                    | Metabolism and nutrition disorders                   |
| Injury, poisoning and procedural complications       | Scratch                   | 0.80479 | Intentional self-injury            | Psychiatric disorders                                |
| Psychiatric disorders                                | Suspiciousness            | 0.80479 | Intentional self-injury            | Psychiatric disorders                                |
| Psychiatric disorders                                | Intentional self-injury   | 0.80479 | Periorbital haematoma              | Injury, poisoning and procedural complications       |
| Psychiatric disorders                                | Intentional self-injury   | 0.80479 | Dizziness exertional               | Nervous system disorders                             |
| Psychiatric disorders                                | Intentional self-injury   | 0.80479 | Blunted affect                     | Psychiatric disorders                                |
| General disorders and administration site conditions | Abasia                    | 0.80479 | Intentional self-injury            | Psychiatric disorders                                |
| Psychiatric disorders                                | Intentional self-injury   | 0.80479 | Intention tremor                   | Nervous system disorders                             |
| Musculoskeletal and connective tissue disorders      | Coccydynia                | 0.80479 | Intentional self-injury            | Psychiatric disorders                                |
| Psychiatric disorders                                | Flat affect               | 0.80479 | Intentional self-injury            | Psychiatric disorders                                |
| Psychiatric disorders                                | Intentional self-injury   | 0.80479 | Mastication disorder               | Nervous system disorders                             |
| Psychiatric disorders                                | Hallucination, tactile    | 0.80479 | Intentional self-injury            | Psychiatric disorders                                |
| Psychiatric disorders                                | Intentional self-injury   | 0.80479 | Glycosylated haemoglobin increased | Investigations                                       |
| Respiratory, thoracic and mediastinal disorders      | Mendelson's syndrome      | 0.80479 | Intentional self-injury            | Psychiatric disorders                                |
| Metabolism and nutrition disorders                   | Diet refusal              | 0.80479 | Intentional self-injury            | Psychiatric disorders                                |

| Basis data for network                               |                            |         |                                           |                                                 |
|------------------------------------------------------|----------------------------|---------|-------------------------------------------|-------------------------------------------------|
| SOC1                                                 | AE1                        | score   | AE2                                       | SOC2                                            |
| Psychiatric disorders                                | Intentional self-injury    | 0.80479 | Spontaneous penile erection               | Reproductive system and breast disorders        |
| Psychiatric disorders                                | Intentional self-injury    | 0.80479 | Buttock pain                              | Musculoskeletal and connective tissue disorders |
| Psychiatric disorders                                | Intentional self-injury    | 0.80479 | Blood creatine phosphokinase MB increased | Investigations                                  |
| Psychiatric disorders                                | Intentional self-injury    | 0.80479 | Glycosylated haemoglobin decreased        | Investigations                                  |
| Psychiatric disorders                                | Intentional self-injury    | 0.80479 | Parkinsonian rest tremor                  | Nervous system disorders                        |
| Psychiatric disorders                                | Intentional self-injury    | 0.80479 | Self mutilation                           | Injury, poisoning and procedural complications  |
| Injury, poisoning and procedural complications       | Spinal fracture            | 0.80476 | Keratitis herpetic                        | Infections and infestations                     |
| Gastrointestinal disorders                           | Perianal erythema          | 0.80459 | Vulval oedema                             | Reproductive system and breast disorders        |
| Gastrointestinal disorders                           | Gastroduodenal ulcer       | 0.80459 | Hypopituitarism                           | Endocrine disorders                             |
| Infections and infestations                          | Lung abscess               | 0.80459 | Optic ischaemic neuropathy                | Eye disorders                                   |
| Eye disorders                                        | Optic ischaemic neuropathy | 0.80459 | Haemophilus sepsis                        | Infections and infestations                     |
| Infections and infestations                          | Pulmonary tuberculosis     | 0.80459 | Optic ischaemic neuropathy                | Eye disorders                                   |
| Musculoskeletal and connective tissue disorders      | Growth retardation         | 0.80456 | Neuropathic arthropathy                   | Musculoskeletal and connective tissue disorders |
| Metabolism and nutrition disorders                   | Hypercatabolism            | 0.80455 | Growth retardation                        | Musculoskeletal and connective tissue disorders |
| Skin and subcutaneous tissue disorders               | Hypertrichosis             | 0.80450 | Skin maceration                           | Skin and subcutaneous tissue disorders          |
| Eye disorders                                        | Conjunctival bleb          | 0.80447 | Disorder of globe                         | Eye disorders                                   |
| General disorders and administration site conditions | Nodule                     | 0.80422 | Cranial nerve disorder                    | Nervous system disorders                        |
| Musculoskeletal and connective tissue disorders      | Osteonecrosis              | 0.80413 | Corneal infection                         | Infections and infestations                     |
| Psychiatric disorders                                | Panic disorder             | 0.80406 | Antisocial behaviour                      | Psychiatric disorders                           |
| Musculoskeletal and connective tissue disorders      | Muscle atrophy             | 0.80404 | Grey syndrome neonatal                    | Cardiac disorders                               |

| Basis data for network                                              |                             |         |                                            |                                                      |
|---------------------------------------------------------------------|-----------------------------|---------|--------------------------------------------|------------------------------------------------------|
| SOC1                                                                | AE1                         | score   | AE2                                        | SOC2                                                 |
| Gastrointestinal disorders                                          | Large intestine perforation | 0.80397 | Neuropathic arthropathy                    | Musculoskeletal and connective tissue disorders      |
| Infections and infestations                                         | Blastomycosis               | 0.80397 | Megaloblasts increased                     | Investigations                                       |
| Investigations                                                      | Megaloblasts increased      | 0.80397 | Pneumonia klebsiella                       | Infections and infestations                          |
| Neoplasms benign, malignant and unspecified (incl cysts and polyps) | Leukaemia cutis             | 0.80397 | Megaloblasts increased                     | Investigations                                       |
| Skin and subcutaneous tissue disorders                              | Skin striae                 | 0.80390 | Hypertrophic cardiomyopathy                | Cardiac disorders                                    |
| General disorders and administration site conditions                | Impaired healing            | 0.80387 | Fluid imbalance                            | Metabolism and nutrition disorders                   |
| Congenital, familial and genetic disorders                          | Limb reduction defect       | 0.80385 | Choreoathetosis                            | Nervous system disorders                             |
| Reproductive system and breast disorders                            | Uterine pain                | 0.80382 | Retinal vascular thrombosis                | Eye disorders                                        |
| Eye disorders                                                       | Retinal vascular thrombosis | 0.80382 | Protein C increased                        | Investigations                                       |
| Eye disorders                                                       | Retinal vascular thrombosis | 0.80382 | Von Willebrand's factor multimers abnormal | Investigations                                       |
| Skin and subcutaneous tissue disorders                              | Leukoderma                  | 0.80381 | Hypercatabolism                            | Metabolism and nutrition disorders                   |
| Investigations                                                      | Nitrogen balance negative   | 0.80372 | Tendon rupture                             | Injury, poisoning and procedural complications       |
| Infections and infestations                                         | Labyrinthitis               | 0.80372 | Early menarche                             | Endocrine disorders                                  |
| Metabolism and nutrition disorders                                  | Fluid imbalance             | 0.80360 | Hypercatabolism                            | Metabolism and nutrition disorders                   |
| Investigations                                                      | Androgens abnormal          | 0.80354 | Blood gonadotrophin increased              | Investigations                                       |
| Gastrointestinal disorders                                          | Gastroduodenal ulcer        | 0.80346 | Spinal compression fracture                | Injury, poisoning and procedural complications       |
| Psychiatric disorders                                               | Orgasm abnormal             | 0.80346 | Cardiac output decreased                   | Investigations                                       |
| Endocrine disorders                                                 | Adrenal suppression         | 0.80339 | Hypercatabolism                            | Metabolism and nutrition disorders                   |
| Renal and urinary disorders                                         | Urinary tract obstruction   | 0.80337 | Listeriosis                                | Infections and infestations                          |
| Renal and urinary disorders                                         | Urinary tract obstruction   | 0.80337 | Implant expulsion                          | General disorders and administration site conditions |

| Basis data for network                                              |                                   |         |                                 |                                                      |
|---------------------------------------------------------------------|-----------------------------------|---------|---------------------------------|------------------------------------------------------|
| SOC1                                                                | AE1                               | score   | AE2                             | SOC2                                                 |
| Injury, poisoning and procedural complications                      | Radius fracture                   | 0.80337 | Urinary tract obstruction       | Renal and urinary disorders                          |
| Renal and urinary disorders                                         | Urinary tract obstruction         | 0.80337 | Rectal polyp                    | Gastrointestinal disorders                           |
| Renal and urinary disorders                                         | Urinary tract obstruction         | 0.80337 | Injection site paraesthesia     | General disorders and administration site conditions |
| Renal and urinary disorders                                         | Urinary tract obstruction         | 0.80337 | Blood growth hormone abnormal   | Investigations                                       |
| Reproductive system and breast disorders                            | Testis discomfort                 | 0.80337 | Urinary tract obstruction       | Renal and urinary disorders                          |
| Neoplasms benign, malignant and unspecified (incl cysts and polyps) | Throat cancer                     | 0.80337 | Urinary tract obstruction       | Renal and urinary disorders                          |
| Renal and urinary disorders                                         | Urinary tract obstruction         | 0.80337 | Pleural rub                     | Respiratory, thoracic and mediastinal disorders      |
| Metabolism and nutrition disorders                                  | Glucose tolerance impaired        | 0.80336 | Body fat disorder               | Metabolism and nutrition disorders                   |
| General disorders and administration site conditions                | Impaired healing                  | 0.80329 | Growth retardation              | Musculoskeletal and connective tissue disorders      |
| Congenital, familial and genetic disorders                          | Congenital absence of bile ducts  | 0.80325 | Bladder fibrosis                | Renal and urinary disorders                          |
| Injury, poisoning and procedural complications                      | Tendon rupture                    | 0.80325 | Cushingoid                      | Endocrine disorders                                  |
| Metabolism and nutrition disorders                                  | Glucose tolerance impaired        | 0.80323 | Neuropathic arthropathy         | Musculoskeletal and connective tissue disorders      |
| Nervous system disorders                                            | Anosmia                           | 0.80323 | Panniculitis                    | Skin and subcutaneous tissue disorders               |
| Respiratory, thoracic and mediastinal disorders                     | Asphyxia                          | 0.80322 | Ejaculation failure             | Reproductive system and breast disorders             |
| Eye disorders                                                       | Scleral thinning                  | 0.80321 | Corneal infection               | Infections and infestations                          |
| Nervous system disorders                                            | Neuroleptic malignant syndrome    | 0.80317 | Extrapyramidal disorder         | Nervous system disorders                             |
| Renal and urinary disorders                                         | Pancreatorenal syndrome           | 0.80310 | Poliomyelitis                   | Infections and infestations                          |
| Investigations                                                      | High density lipoprotein abnormal | 0.80310 | Poliomyelitis                   | Infections and infestations                          |
| Infections and infestations                                         | Poliomyelitis                     | 0.80310 | Gastroenteritis cryptosporidial | Infections and infestations                          |
| Endocrine disorders                                                 | Hypopituitarism                   | 0.80309 | Skin hypopigmentation           | Skin and subcutaneous tissue disorders               |

| Basis data for network                          |                                            |         |                                     |                                                 |
|-------------------------------------------------|--------------------------------------------|---------|-------------------------------------|-------------------------------------------------|
| SOC1                                            | AE1                                        | score   | AE2                                 | SOC2                                            |
| Congenital, familial and genetic disorders      | Patent ductus arteriosus                   | 0.80298 | Extremity contracture               | Musculoskeletal and connective tissue disorders |
| Skin and subcutaneous tissue disorders          | Dermatitis psoriasiform                    | 0.80296 | Oculomucocutaneous syndrome         | Skin and subcutaneous tissue disorders          |
| Psychiatric disorders                           | Emotional disorder                         | 0.80287 | Cerebral venous thrombosis          | Nervous system disorders                        |
| Reproductive system and breast disorders        | Withdrawal bleed                           | 0.80281 | Retinal vascular thrombosis         | Eye disorders                                   |
| Endocrine disorders                             | Cushing's syndrome                         | 0.80279 | Oropharyngeal candidiasis           | Infections and infestations                     |
| Investigations                                  | Spermatozoa progressive motility decreased | 0.80277 | Tongue paralysis                    | Nervous system disorders                        |
| Pregnancy, puerperium and perinatal conditions  | Uterine hypertonus                         | 0.80273 | Uterine perforation                 | Reproductive system and breast disorders        |
| Infections and infestations                     | Nasal candidiasis                          | 0.80271 | Adrenal disorder                    | Endocrine disorders                             |
| Cardiac disorders                               | Arteriospasm coronary                      | 0.80268 | Blood luteinising hormone decreased | Investigations                                  |
| Respiratory, thoracic and mediastinal disorders | Pulmonary granuloma                        | 0.80263 | Pancreatic enzymes decreased        | Investigations                                  |
| Blood and lymphatic system disorders            | Polycythaemia                              | 0.80262 | Panniculitis                        | Skin and subcutaneous tissue disorders          |
| Musculoskeletal and connective tissue disorders | Joint range of motion decreased            | 0.80248 | Mendelson's syndrome                | Respiratory, thoracic and mediastinal disorders |
| Metabolism and nutrition disorders              | Diet refusal                               | 0.80248 | Joint range of motion decreased     | Musculoskeletal and connective tissue disorders |
| Musculoskeletal and connective tissue disorders | Joint range of motion decreased            | 0.80248 | Suspiciousness                      | Psychiatric disorders                           |
| Musculoskeletal and connective tissue disorders | Joint range of motion decreased            | 0.80248 | Hallucination, tactile              | Psychiatric disorders                           |
| Musculoskeletal and connective tissue disorders | Joint range of motion decreased            | 0.80248 | Intention tremor                    | Nervous system disorders                        |
| Musculoskeletal and connective tissue disorders | Coccydynia                                 | 0.80248 | Joint range of motion decreased     | Musculoskeletal and connective tissue disorders |
| Nervous system disorders                        | Parkinsonian rest tremor                   | 0.80248 | Joint range of motion decreased     | Musculoskeletal and connective tissue disorders |
| Musculoskeletal and connective tissue disorders | Joint range of motion decreased            | 0.80248 | Dizziness exertional                | Nervous system disorders                        |
| Musculoskeletal and connective tissue disorders | Joint range of motion decreased            | 0.80248 | Mastication disorder                | Nervous system disorders                        |

| Basis data for network                               |                                           |         |                                       |                                                                     |
|------------------------------------------------------|-------------------------------------------|---------|---------------------------------------|---------------------------------------------------------------------|
| SOC1                                                 | AE1                                       | score   | AE2                                   | SOC2                                                                |
| Investigations                                       | Glycosylated haemoglobin decreased        | 0.80248 | Joint range of motion decreased       | Musculoskeletal and connective tissue disorders                     |
| Musculoskeletal and connective tissue disorders      | Joint range of motion decreased           | 0.80248 | Periorbital haematoma                 | Injury, poisoning and procedural complications                      |
| Musculoskeletal and connective tissue disorders      | Joint range of motion decreased           | 0.80248 | Flat affect                           | Psychiatric disorders                                               |
| Musculoskeletal and connective tissue disorders      | Buttock pain                              | 0.80248 | Joint range of motion decreased       | Musculoskeletal and connective tissue disorders                     |
| Psychiatric disorders                                | Blunted affect                            | 0.80248 | Joint range of motion decreased       | Musculoskeletal and connective tissue disorders                     |
| Reproductive system and breast disorders             | Spontaneous penile erection               | 0.80248 | Joint range of motion decreased       | Musculoskeletal and connective tissue disorders                     |
| General disorders and administration site conditions | Abasia                                    | 0.80248 | Joint range of motion decreased       | Musculoskeletal and connective tissue disorders                     |
| Musculoskeletal and connective tissue disorders      | Joint range of motion decreased           | 0.80248 | Scratch                               | Injury, poisoning and procedural complications                      |
| Investigations                                       | Blood creatine phosphokinase MB increased | 0.80248 | Joint range of motion decreased       | Musculoskeletal and connective tissue disorders                     |
| Injury, poisoning and procedural complications       | Self mutilation                           | 0.80248 | Joint range of motion decreased       | Musculoskeletal and connective tissue disorders                     |
| Investigations                                       | Glycosylated haemoglobin increased        | 0.80248 | Joint range of motion decreased       | Musculoskeletal and connective tissue disorders                     |
| Psychiatric disorders                                | Middle insomnia                           | 0.80245 | Feeling hot and cold                  | General disorders and administration site conditions                |
| Psychiatric disorders                                | Middle insomnia                           | 0.80245 | Pressure of speech                    | Psychiatric disorders                                               |
| Vascular disorders                                   | Aortic aneurysm                           | 0.80241 | Skin depigmentation                   | Skin and subcutaneous tissue disorders                              |
| Nervous system disorders                             | Choreoathetosis                           | 0.80230 | Injection site nodule                 | General disorders and administration site conditions                |
| Investigations                                       | Nitrogen balance negative                 | 0.80229 | Fluid imbalance                       | Metabolism and nutrition disorders                                  |
| Endocrine disorders                                  | Adrenal suppression                       | 0.80228 | General symptom                       | General disorders and administration site conditions                |
| Gastrointestinal disorders                           | Peptic ulcer perforation                  | 0.80213 | Impaired healing                      | General disorders and administration site conditions                |
| Investigations                                       | Prostatic specific antigen increased      | 0.80211 | Total cholesterol/HDL ratio decreased | Investigations                                                      |
| Investigations                                       | Prostatic specific antigen increased      | 0.80211 | Adrenal neoplasm                      | Neoplasms benign, malignant and unspecified (incl cysts and polyps) |

| Basis data for network                                              |                                      |         |                                      |                                                                     |
|---------------------------------------------------------------------|--------------------------------------|---------|--------------------------------------|---------------------------------------------------------------------|
| SOC1                                                                | AE1                                  | score   | AE2                                  | SOC2                                                                |
| Investigations                                                      | Prostatic specific antigen increased | 0.80211 | Blood viscosity increased            | Investigations                                                      |
| General disorders and administration site conditions                | Mucosal inflammation                 | 0.80199 | Bacterial infection                  | Infections and infestations                                         |
| Endocrine disorders                                                 | Adrenal suppression                  | 0.80192 | Urine calcium increased              | Investigations                                                      |
| Nervous system disorders                                            | Cerebrospinal fluid rhinorrhoea      | 0.80191 | Pituitary tumour benign              | Neoplasms benign, malignant and unspecified (incl cysts and polyps) |
| Neoplasms benign, malignant and unspecified (incl cysts and polyps) | Pituitary tumour benign              | 0.80191 | Acute left ventricular failure       | Cardiac disorders                                                   |
| Neoplasms benign, malignant and unspecified (incl cysts and polyps) | Pituitary tumour benign              | 0.80191 | Superior sagittal sinus thrombosis   | Nervous system disorders                                            |
| Injury, poisoning and procedural complications                      | Scrotal haematoma                    | 0.80184 | Affective disorder                   | Psychiatric disorders                                               |
| Infections and infestations                                         | Scrotal infection                    | 0.80184 | Affective disorder                   | Psychiatric disorders                                               |
| Renal and urinary disorders                                         | Ureteric obstruction                 | 0.80184 | Affective disorder                   | Psychiatric disorders                                               |
| Psychiatric disorders                                               | Affective disorder                   | 0.80184 | Ovarian atrophy                      | Reproductive system and breast disorders                            |
| Nervous system disorders                                            | Anosmia                              | 0.80172 | Leukoderma                           | Skin and subcutaneous tissue disorders                              |
| Metabolism and nutrition disorders                                  | Glucose tolerance impaired           | 0.80169 | Exophthalmos                         | Eye disorders                                                       |
| Gastrointestinal disorders                                          | Aptyalism                            | 0.80167 | Blood antidiuretic hormone increased | Investigations                                                      |
| Gastrointestinal disorders                                          | Aptyalism                            | 0.80146 | Intestinal dilatation                | Gastrointestinal disorders                                          |
| Skin and subcutaneous tissue disorders                              | Skin fragility                       | 0.80145 | Urine calcium increased              | Investigations                                                      |
| Nervous system disorders                                            | Anosmia                              | 0.80142 | Hypopituitarism                      | Endocrine disorders                                                 |
| Gastrointestinal disorders                                          | Peptic ulcer perforation             | 0.80136 | Myocardial rupture                   | Cardiac disorders                                                   |
| Injury, poisoning and procedural complications                      | Spinal compression fracture          | 0.80131 | Eye inflammation                     | Eye disorders                                                       |
| Reproductive system and breast disorders                            | Vulval oedema                        | 0.80126 | Vulval ulceration                    | Reproductive system and breast disorders                            |
| Musculoskeletal and connective tissue disorders                     | Myopathy steroid                     | 0.80112 | Gastroduodenal ulcer                 | Gastrointestinal disorders                                          |

| Basis data for network                               |                             |         |                            |                                                      |
|------------------------------------------------------|-----------------------------|---------|----------------------------|------------------------------------------------------|
| SOC1                                                 | AE1                         | score   | AE2                        | SOC2                                                 |
| Reproductive system and breast disorders             | Ejaculation failure         | 0.80107 | Acute respiratory failure  | Respiratory, thoracic and mediastinal disorders      |
| Endocrine disorders                                  | Adrenal suppression         | 0.80101 | Aortic aneurysm            | Vascular disorders                                   |
| Skin and subcutaneous tissue disorders               | Leukoderma                  | 0.80101 | Polycythaemia              | Blood and lymphatic system disorders                 |
| Cardiac disorders                                    | Hypertrophic cardiomyopathy | 0.80090 | Fluid imbalance            | Metabolism and nutrition disorders                   |
| Eye disorders                                        | Ophthalmoplegia             | 0.80087 | Cerebral venous thrombosis | Nervous system disorders                             |
| Cardiac disorders                                    | Myocardial rupture          | 0.80085 | Panniculitis               | Skin and subcutaneous tissue disorders               |
| Pregnancy, puerperium and perinatal conditions       | Delayed delivery            | 0.80084 | Injection site anaesthesia | General disorders and administration site conditions |
| General disorders and administration site conditions | Injection site anaesthesia  | 0.80084 | Labour complication        | Pregnancy, puerperium and perinatal conditions       |
| General disorders and administration site conditions | Injection site anaesthesia  | 0.80084 | Antepartum haemorrhage     | Pregnancy, puerperium and perinatal conditions       |
| Psychiatric disorders                                | Orgasm abnormal             | 0.80083 | Apyalism                   | Gastrointestinal disorders                           |
| Injury, poisoning and procedural complications       | Tendon rupture              | 0.80073 | Corneal infection          | Infections and infestations                          |
| Nervous system disorders                             | Tardive dyskinesia          | 0.80073 | Antiphospholipid syndrome  | Immune system disorders                              |
| Nervous system disorders                             | Meige's syndrome            | 0.80073 | Tardive dyskinesia         | Nervous system disorders                             |
| Gastrointestinal disorders                           | Large intestine perforation | 0.80068 | Skin depigmentation        | Skin and subcutaneous tissue disorders               |
| Musculoskeletal and connective tissue disorders      | Growth retardation          | 0.80065 | Skin depigmentation        | Skin and subcutaneous tissue disorders               |
| Skin and subcutaneous tissue disorders               | Skin depigmentation         | 0.80059 | Skin striae                | Skin and subcutaneous tissue disorders               |
| Injury, poisoning and procedural complications       | Spinal fracture             | 0.80057 | Conjunctival bleb          | Eye disorders                                        |
| Investigations                                       | Urine potassium increased   | 0.80048 | Colonic atony              | Gastrointestinal disorders                           |
| Reproductive system and breast disorders             | Infertility                 | 0.80047 | Antiphospholipid syndrome  | Immune system disorders                              |
| Reproductive system and breast disorders             | Infertility                 | 0.80047 | Meige's syndrome           | Nervous system disorders                             |



| Basis data for network                               |                                    |         |                                  |                                                      |
|------------------------------------------------------|------------------------------------|---------|----------------------------------|------------------------------------------------------|
| SOC1                                                 | AE1                                | score   | AE2                              | SOC2                                                 |
| Endocrine disorders                                  | Adrenal disorder                   | 0.80047 | Trigeminal nerve disorder        | Nervous system disorders                             |
| Infections and infestations                          | Dysentery                          | 0.80035 | Blood urine                      | Investigations                                       |
| Investigations                                       | Blood urine                        | 0.80035 | Choluria                         | Renal and urinary disorders                          |
| Injury, poisoning and procedural complications       | Spinal compression fracture        | 0.80032 | Pathological fracture            | Musculoskeletal and connective tissue disorders      |
| Reproductive system and breast disorders             | Retrograde ejaculation             | 0.80029 | Tardive dyskinesia               | Nervous system disorders                             |
| Eye disorders                                        | Exophthalmos                       | 0.80027 | Myocardial rupture               | Cardiac disorders                                    |
| General disorders and administration site conditions | Injection site mass                | 0.80021 | Oestradiol decreased             | Investigations                                       |
| General disorders and administration site conditions | Mucosa vesicle                     | 0.80013 | Atonic urinary bladder           | Renal and urinary disorders                          |
| General disorders and administration site conditions | Mucosa vesicle                     | 0.80013 | Glossopharyngeal nerve paralysis | Nervous system disorders                             |
| Infections and infestations                          | Injection site abscess             | 0.80013 | Tongue paralysis                 | Nervous system disorders                             |
| Metabolism and nutrition disorders                   | Fluid imbalance                    | 0.80011 | Cushingoid                       | Endocrine disorders                                  |
| Skin and subcutaneous tissue disorders               | Dermatitis atopic                  | 0.80010 | Glomerulonephritis               | Renal and urinary disorders                          |
| Cardiac disorders                                    | Myocardial rupture                 | 0.80008 | Disorder of globe                | Eye disorders                                        |
| Infections and infestations                          | Acquired immunodeficiency syndrome | 0.80007 | Brain stem infarction            | Nervous system disorders                             |
| Infections and infestations                          | Cytomegalovirus chorioretinitis    | 0.80007 | Brain stem infarction            | Nervous system disorders                             |
| Infections and infestations                          | Neonatal infection                 | 0.80002 | Apgar score low                  | Investigations                                       |
| Investigations                                       | Apgar score low                    | 0.80002 | Fever neonatal                   | General disorders and administration site conditions |
| Infections and infestations                          | Neonatal pneumonia                 | 0.80002 | Apgar score low                  | Investigations                                       |
| Investigations                                       | Apgar score low                    | 0.80002 | Vomiting neonatal                | Gastrointestinal disorders                           |
| Respiratory, thoracic and mediastinal disorders      | Neonatal tachypnoea                | 0.80002 | Apgar score low                  | Investigations                                       |

# Highly connected nodes from MCODE analysis

## Cluster No. 1 (Linkage Score: 42.181)

### Number of Nodes (details below): 293 - Number of Edges: 12359

Glucose tolerance impaired, Thoracoabdominal aneurysm, without mention of rupture, Thoracoabdominal aortic aneurysm, Abdominal aneurysm without mention of rupture, Aneurysm of abdominal aorta, Abdominal aneurysm, Thoracic aneurysm without mention of rupture, Aortic aneurysm of unspecified site without mention of rupture, Aneurysm of descending aorta, Aneurysm of arch of aorta, Aneurysm of aorta, Aneurysm of aortic arch, Aneurysm of ascending aorta, Aneurysm aortic, Thoracic aortic aneurysm, Abdominal aortic aneurysm, Hyperthrombinemia, Hyperthrombinaemia, Thrombophilia, Hyperfibrinogenemia, Hyperfibrinogenaemia, Fractured hip, Broken hip, Panniculitis affecting other sites, Panniculitis, unspecified, Panniculitis specified as affecting neck, Hypertrophy of fat pad, knee, Panniculitis, unspecified site, Wound healing disturbance of, Wound healing delayed, Granulation suppressed, Delayed healing of wound, Healing impaired, Healing delayed, Healing abnormal, Other exophthalmic conditions, Intermittent exophthalmos, Bulging eyes, Exophthalmos NOS, Pulsating exophthalmos, Constant exophthalmos, Exophthalmos, unspecified, Proptosis, Thrombosis cerebral vein, Thrombosis of intracranial veins, Thrombophlebitis cerebral vein, Catabolism extreme, Catabolism increased, Extreme catabolism, Prediabetes, Glucose intolerance, Latent diabetes, Abnormal glucose tolerance, Pre-diabetic, Subclinical diabetes, Chemical diabetes, Borderline diabetes, Pre-diabetes, Glucose tolerance abnormal, Chronic or unspecified peptic ulcer of unspecified site with hemorrhage and perforation, Acute peptic ulcer of unspecified site with hemorrhage and perforation, Peptic ulcer perforation & haemorrhage, Acute peptic ulcer of unspecified site with hemorrhage and perforation, with obstruction, Acute peptic ulcer of unspecified site with hemorrhage and perforation, without mention of obstructi, Acute peptic ulcer of unspecified site with perforation, without mention of obstruction, Peptic ulcer haemorrhage and perforation, obstructive, Peptic ulcer with hemorrhage and perforation, Chronic or unspecified peptic ulcer of unspecified site with haemorrhage and perforation, Acute peptic ulcer of unspecified site with haemorrhage and perforation, Chronic or unspecified peptic ulcer of unspecified site with hem and perf, with obstruction, Chronic or unspecified peptic ulcer of unspec site with hemorrhage and perforation, w/o ment of obst, Chronic or unspecified peptic ulcer of unspecified site with perforation, w/o mention of obstruction, Chronic or unspecified peptic ulcer of unspecified site with perforation, Peptic ulcer/hemorrhage + perforation, Peptic ulcer perforation and haem, Peptic ulcer with hemorrhage & perforation, Peptic ulcer haemorrhage and perforation, Ulcer peptic with perf and hem, Peptic ulcer perforation and hemorrhage, Peptic ulcer haemper, Acute peptic ulcer of unspecified site with perforation, Perforated peptic ulcer, Ulcer peptic with perforation, Peptic ulcer perforated, Perforation during colonoscopy, Cecum rupture, Cecum perforation, Large intestinal ulcer perforation, Caecum rupture, Caecum perforation, Large intestinal perforation NOS, Perforation post colonoscopy, Perforation post barium enema, Colonic perforation postoperative, Perforated large intestine, Perforated colon, Iatrogenic colon perforation, Colonic perforation, Ruptured diverticulum of colon, Perforation of colon, Large bowel perforation, Perforation large intestine, Perforation colon, Intestinal perforation large, Colon perforation, Arthropathy associated with neurological disorders, Charcot arthropathy, Charcot's joint, Arthropathy neurogenic, Arthritis Charcot-type, Idiopathic short stature, Growth suppression, Height increase rate lowered, Growth retarded, Cardiac rupture, Myocardial rupture (post infarct), Skin fragility of, Loss of skin markings, Spot of depigmentation, Depigmentation spot, Depigmentation skin, Fat atrophy NOS, Subglottic obstruction, Other kyphoscoliosis and scoliosis, Scoliosis (and kyphoscoliosis), idiopathic, Scoliosis associated with other conditions, Kyphoscoliosis and scoliosis, Rotoscoliosis, Thoracogenic scoliosis, Progressive infantile idiopathic scoliosis, Resolving infantile idiopathic scoliosis, Myopathy steroid-induced, Steroid myopathy, Catabolic reaction, Reaction catabolic, Hypokalemic alkalosis, Hypokalaemic alkalosis, Alkalosis hypokalemic, Chromium low, Chromium decreased, Open wound of elbow, forearm, and wrist, with tendon involvement, Open wound of toe(s), with tendon involvement, Open wound of forearm, with tendon involvement, Open wound of axillary region, with tendon involvement, Open wound of shoulder and upper arm, with tendon involvement, Multiple and unspecified open wound of lower limb, with tendon involvement, Open wound of foot except toe(s) alone, with tendon involvement, Open wound of knee, leg (except thigh), and ankle, with tendon involvement, Open wound of hip and thigh, with tendon involvement, Multiple and unspecified open wound of upper limb, with tendon involvement, Open wound of fingers, with tendon involvement, Open wound of wrist, with tendon involvement, Open wound of elbow, with tendon involvement, Open wound of multiple sites of shoulder and upper arm, with tendon involvement, Open wound of upper arm, with tendon involvement, Open wound of scapular region, with tendon involvement, Open wound of shoulder region, with tendon involvement, Achilles tendon sprain, Hamstring tendon injury, Achilles tendon injury, Late effect of tendon injury, Tendon strain, Hand tendon injury, Fracture of vertebral column with spinal cord injury, Open fracture of unspecified vertebra with spinal cord lesion, Closed fracture of unspecified part of vertebral column without mention of spinal cord lesion, Closed fracture of unspecified vertebra with spinal cord injury, Closed fracture of unspecified vertebra with spinal cord lesion, Fracture of vertebral column with spinal cord lesion, Open fracture of unspecified part of vertebral column without mention of spinal cord lesion, Late effect of fracture of spine and trunk without mention of spinal cord lesion, Open fracture of unspecified vertebra with spinal cord injury, Open fracture of unspecified part of vertebral column without mention of spinal cord injury, Closed fracture of unspecified part of vertebral column without mention of spinal cord injury, Spinal fractures, Spinal fracture (excl compression), Fracture of vertebral column without mention of spinal cord lesion, Fracture of vertebral column without mention of spinal cord injury, Spinal fracture NOS, Fracture vertebral, Fractured vertebra, Fracture of vertebra, Vertebral fracture, Fractured transverse process, Fracture of spine, Jefferson's fracture, Burst fracture, Fractured compression T8, Vertebral collapse, Compression of fractured vertebra, Fractured vertebra (compression), Collapsed vertebra, Corneal infection NOS, Scleromalacia perforans, Other after-cataract, not obscuring vision, After-cataract, unspecified, Soemmering's ring, Posterior capsule fibrosis, Posterior capsule plaque, Aftercataract, After-cataract, Hypothalamo-pituitary disorders, After-cataract, obscuring vision, Neuropathic arthropathy, Central serous retinopathy, Growth retardation, Anterior subcapsular polar nonsenile cataract, Impaired healing, Posterior subcapsular polar nonsenile cataract, Exophthalmos, Posterior subcapsular polar non-senile cataract, Myocardial rupture, Anterior subcapsular polar non-senile cataract, Aortic aneurysm, Anterior subcapsular cataract, Skin fragility, Subcapsular cataract, Skin depigmentation, Posterior subcapsular cataract, Panniculitis, Posterior subcapsular polar senile cataract, Leukoderma, Anterior subcapsular polar senile cataract, Fat atrophy, Androgen excess effect, Nasal mucosa atrophy, Hermaphroditism female, Laryngeal obstruction, Virilisation, Cerebral venous thrombosis, Masculinization, Scoliosis, Masculinisation, Myopathy steroid, Virilization, Hypercatabolism, Secondary adrenal insufficiency, Fluid imbalance, Hypopituitarism, Catabolic state, Pituitary function depression, Body fat disorder, Pituitary hormone deficiency, Alkalosis hypokalaemic, Panhypopituitarism, Urine calcium increased, Pituitary insufficiency, Nitrogen balance negative, Pituitary activity decreased, Blood chromium decreased, Insufficiency pituitary, Tendon injury, Moon face top, Spinal fracture, Moon face, Spinal compression fracture, Cushing-like build, Hip fracture, Cushingoid facies, Corneal infection, Crisis addisonian, Peptic ulcer perforation, Crisis adrenal, Large intestine perforation, Adrenal crisis, Optic neuropathy, Addisonian crisis, Injection site abscess sterile, Suppression adrenal, Scleromalacia, Pituitary adrenal system suppression of, Posterior capsule opacification, HOCM, Chorioretinopathy, Obstructive cardiomyopathy, Cataract subcapsular, Idiopathic hypertrophic subaortic stenosis, Virilism, HOCM Hypertrophic obstructive cardiomyopathy, Secondary adrenocortical insufficiency, IHSS, Hypopituitarism, Gray baby syndrome, Cushingoid, Grey syndrome, Adrenocortical insufficiency acute, Hypertrophic obstructive cardiomyopathy, Grey syndrome neonatal, Adrenal suppression, Grey baby syndrome, Hypertrophic cardiomyopathy, Gray syndrome neonatal, Hypercoagulation

## Cluster No. 2 (Linkage Score: 27.355)

### Number of Nodes (details below): 155 - Number of Edges: 4240

Limb reduction defect, Other diseases of larynx, not elsewhere classified, Other diseases of larynx, Unspecified disease of larynx, Laryngeal disorder NOS, Longitudinal deficiency, phalanges, complete or partial, Longitudinal deficiency, combined, involving humerus, radius, and ulna (complete or incomplete), Longitudinal deficiency, phalanges of hand, complete or partial (with or w/o distal def, incomplete), Longitudinal def, tarsals or metatarsals, complete or partial (with or w/o incomp phalangeal def), Longitudinal deficiency, tibiofibular, complete or partial (with or w/o distal deficiencies, incomp), Longitudinal deficiency, combined, involving femur, tibia, and fibula (complete or incomplete), Longitudinal deficiency, phalanges of foot, complete or partial (with or w/o distal def, incomplete), Longitudinal deficiency, ulnar, complete or partial (with or w/o distal deficiencies, incomplete), Reduction deformities, unspecified limb, congenital, Longitudinal deficiency, fibular, complete or partial (with or w/o distal deficiencies, incomplete), Longitudinal deficiency, tibia, complete or partial (with or w/o distal deficiencies, incomplete), Longitudinal deficiency, femoral, complete or partial (with or w/o distal deficiencies, incomplete), Longitudinal deficiency of lower limb, not elsewhere classified, Unspecified reduction deformity of lower limb, congenital, Reduction deformities of lower limb, congenital, Longitudinal deficiency, carp or metacarp, complete or partial (with or w/o incomp phalangeal def), Longitudinal deficiency, radial, complete or partial (with or w/o distal deficiencies, incomplete), Longitudinal deficiency, radioulnar, complete or partial (with or w/o distal deficiencies, incomp), Longitudinal deficiency, humeral, complete or partial (with or w/o distal deficiencies, incomplete), Longitudinal deficiency of upper limb, not elsewhere classified, Reduction deformities of upper limb, congenital, Ectromelia two limbs, Ectromelia three limbs, Transverse deficiency of upper limb, Limb reduction deformity, Ectromelia one limb, Micromelia, Transverse deficiency of lower limb, Unspecified reduction deformity of upper limb, congenital, Absent limbs, Absent limb, Phocomelia, Hemimelia, Ectromelia four limbs, Ectromelia, Amelia, Absence of limbs, Aspiration of gastrointestinal contents into airways, Acute on chronic respiratory failure, Acute respiratory decompensation, Ejaculation inhibited, Ejaculation decreased, Engorgement of breasts associated with childbirth, unspecified as to episode of care, Engorgement breast, Engorgement of breasts assoc with childbirth, delivered, with ment of postpar comp, Engorgement of breasts assoc with childbirth, delivered, with or w/o ment of antepar cond, Engorgement of breast associated with childbirth, postpartum, Engorgement of breast associated with childbirth, antepartum, Engorgement of breasts associated with childbirth, Engorgement, breast, Stereotypy/habit disorder, Stereotypic movement disorder (of childhood), Painful orgasm, Delayed orgasm, Obsessive-compulsive disorders, OCD, Obsessive-compulsive reaction, Compulsive neurosis, Obsessional neurosis, Obsessional neurosis aggravated, Compulsive conduct disorder, Obsessional state, Obsessive-compulsive neurosis, Reaction obsessive-compulsive, Obsessive reaction, Compulsive reaction, Tongue deviation, Tongue sluggish, Tongue movement disturbance, Tongue movement impaired, Tongue weak, Hemifacial spasm, Oro-facial spasm, Sperm motility decreased, False positive pregnancy, False positive pregnancy test, Platelet aggregation NOS increased, LFTs, Liver function tests, Liver function tests NOS, GH inc, Serum growth hormone increased, Growth hormone excess, Somatotrophin increased, Somatotropin high, Somatotropin increased, GH increased, Growth hormone overproduction, Growth hormone increased, Plasma growth hormone increased, ADH inc, Plasma antidiuretic hormone increased, ADH increased, Vasopressin high, Antidiuretic hormone increased, Laryngeal disorder, Serum antidiuretic hormone increased, Aspiration, Abscess injection site, Asphyxia, Vasopressin increased, Acute respiratory failure, Anticardiolipin antibody syndrome, Retrograde ejaculation, Granuloma injection site, Ejaculation failure, Injection site granuloma, Breast engorgement, Nodule injection site, Aspermia, Nutcracker esophagus, Stereotypic movement disorder, Nutcracker oesophagus, Orgasm abnormal, Dyskinesia esophageal, Obsessive-compulsive disorder, Dyskinesia of oesophagus, Tongue paralysis, Dyskinesia of esophagus, Injection site abscess, Pigmentation retinal, Meige's syndrome, Tourettes syndrome, Facial spasm, Brissaud's II, Spermatozoa progressive motility decreased, Gilles de la Tourette's, Sperm count increased, Tourette syndrome, Pregnancy test false positive, Syndrome Tourette, Platelet aggregation increased, Tourette's syndrome aggravated, Liver function test, Coprolalia-generalized tic, Blood growth hormone increased, Gilles de la Tourette, Blood antidiuretic hormone increased, Tourette's syndrome, Antiphospholipid syndrome, Gilles de la Tourette's disorder, Injection site nodule, Gilles de la Tourette syndrome, Intestinal dilatation, Guinon's myospasia impulsiva, Dyskinesia oesophageal, Pigment precipitation, Tourette's disorder, Retinal pigmentation, Syndrome Gilles de la Tourette

**Cluster No. 3 (Linkage Score: 22.506)****Number of Nodes (details below): 79 - Number of Edges: 1778**

Joint range of motion decreased, Nasal sinus discharge, Parasuicide, Repeated parasuicide, Deliberate self-harm, Deliberate self-injury, Olfactory hallucination, Hallucination olfactory, Joint range of motion decreased lumbar spine, Joint range of motion decreased cervical spine, Unable to walk, Abasic, Gait inability, Prolonged morning erection, Erection nocturnal, Wariness, Haptic hallucination, Haptic hallucinations, Lack of feeling, Feeling lack of, Affect loss, Loss of affect, Detachment emotional, Affect lack, Affective blunting, Pill rolling, Disturbance of mastication, Tremor intention, Sore coccyx, Coccyalgia, Haemoglobin A1C increased, Glycohaemoglobin increased, Glycosylated hemoglobin increased, Glycosylated hemoglobin high, Glycosylated hemoglobin abnormal, HbA1C increased, Paranasal sinus hypersecretion, Hemoglobin A1C increased, Mendelson's syndrome, Glycohemoglobin increased, Spontaneous penile erection, Glycosylated haemoglobin high, Suspiciousness, Glycosylated haemoglobin abnormal, Intentional self-injury, Glycosylated hemoglobin decreased, Hallucination, tactile, HbA1C decreased, Hallucination, olfactory, CPK-MB increased, Flat affect, Creatine kinase MB high, Blunted affect, Creatine kinase MB increased, Parkinsonian rest tremor, CK2 increased, Mastication disorder, Serum creatine phosphokinase MB increased, Intention tremor, Plasma creatine phosphokinase MB increased, Dizziness exertional, Contusion of eyelids and periocular area, Coccydynia, Eyelid haematoma, Buttock pain, Eyelid hematoma, Diet refusal, Periorbital contusion, Glycosylated haemoglobin increased, Periorbital hematoma, Glycosylated haemoglobin decreased, Black eye, not otherwise specified, Blood creatine phosphokinase MB increased, Contusion of orbital tissues, Self mutilation, Periorbital haematoma, Scratch, Black eye, Abasia

**Cluster No. 4 (Linkage Score: 18.616)****Number of Nodes (details below): 86 - Number of Edges: 1601**

Fallot's tetralogy, Acquired tracheo-esophageal fistula, Imperforate anus, Anus imperforate, Congenital anal atresia, Ovary enlarged, Enlargement ovary, Malignant neoplasm of other sites of tongue, Malignant neoplasm of tip and lateral border of tongue, Malignant neoplasm of ventral surface of tongue, Squamous cell carcinoma of the tongue, Mucoepidermoid carcinoma of the tongue, Adenoid cystic carcinoma of the tongue, Malignant tongue neoplasm, Malignant neoplasm of tongue, unspecified, Malignant neoplasm of junctional zone of tongue, Malignant neoplasm of anterior two-thirds of tongue, part unspecified, Malignant neoplasm of dorsal surface of tongue, Malignant neoplasm of base of tongue, Malignant neoplasm of tongue, Malignant tongue cancer, Carcinoma of tongue, Neoplasm of uncertain behaviour of pituitary gland and craniopharyngeal duct, Neoplasm of uncertain behavior of pituitary gland and craniopharyngeal duct, Pituitary tumor NOS, Pituitary neoplasm NOS, Pituitary tumour NOS, Pituitary gland neoplasm, Metastatic trophoblastic disease, Hydatidiform mole malignant, Placental choriocarcinoma, Epithelioid leiomyoma, Leiomyoma NOS, Hepatoblastoma resectable, Hepatoblastoma NOS, Hepatoblastoma non-resectable, Carcinoma chorionic, Choriocarcinoma (exc placental, ovarian & testicular), Choriocarcinoma NOS, Runting, Dwarfism, not elsewhere classified, Nanism, Pituitary dwarfism, Dwarf, Dwarfism NOS, Serum estrogen decreased, Plasma estrogen decreased, Blood estrogen decreased, Estrogen decreased, Oestrogen low, Acquired tracheo-oesophageal fistula, Estrogen low, Ovarian enlargement, Oestrogen decreased, Tongue neoplasm malignant stage unspecified, Serum oestrogen decreased, Prolactinoma, Estrogens decreased, Leiomyoma, Plasma oestrogen decreased, Pituitary tumour, Intracranial abscess, Malignant hydatidiform mole, Brain abscess NOS, Hepatoblastoma, Neurofibromatosis, type 2 (acoustic neurofibromatosis), Glioblastoma multiforme, Neurofibromatosis, type 1 (von Recklinghausen's disease), Choriocarcinoma, Neurofibromatosis, unspecified, Astrocytoma, Von Recklinghausen's disease (of nerve), Brain abscess, Neurofibromatosis aggravated, Dwarfism, Fallot tetralogy of, Blood oestrogen decreased, Fallot tetralogy, Phosphenes, Tetralogy of Fallot, Congenital joint malformation, Neurofibromatosis, Joint malformation, Dermoid cyst of ovary, Congenital joint malformation NOS, Anal atresia

## Cluster No. 5 (Linkage Score: 17.91)

### Number of Nodes (details below): 201 - Number of Edges: 3600

Enterococcal infection, Metastatic, Metastatic epithelioma, Metastatic neoplasm NOS, primary site known, Metastatic neoplasm NOS, primary site unknown, Metastatic disease, Metastatic carcinoma, Carcinoma of unknown primary, Malignant neoplasm disseminated, Disseminated malignant neoplasm, Disseminated carcinoma, Disseminated adenocarcinoma, Carcinomatosis, Unknown primary cancer, Infusion related pain, Infusion associated discomfort, Infusion associated shivering, Infusion associated chills, Infusion associated sensation of cold, Infusion associated symptoms, Pulmonary secondaries, Endobronchial metastases, Pulmonary metastases, Secondary malignant neoplasm of lung, Metastasis in lung, Lung metastases, Lung secondaries, Bile ducts, cancer of, Carcinoma bile duct, Cholangiocarcinoma NOS, Bile duct signet-ring cell carcinoma, Intrahepatic bile duct carcinoma, Intrahepatic bile duct cancer NOS, Biliary carcinoma, Bile duct undifferentiated carcinoma, Bile duct squamous cell carcinoma, Bile duct small cell carcinoma, Bile duct papillary adenocarcinoma, Bile duct oat cell carcinoma, Bile duct mucinous adenocarcinoma, Bile duct clear cell adenocarcinoma, Bile duct adenosquamous carcinoma, Bile duct adenocarcinoma, Cholangiocarcinoma, Malignant neoplasm of extrahepatic bile ducts, Malignant neoplasm of intrahepatic bile ducts, Extrahepatic bile duct cancer, Intrahepatic bile duct cancer, Bile duct cancer NOS, Bile duct carcinoma, Diffuse small cleaved cell lymphoma (Adult T-cell lymphoma/leukemia) (Working Formulation), Diffuse mixed small and large cell lymphoma (Adult T-cell lymphoma/leukemia) (Working Formulation), Diffuse large cell lymphoma (Adult T-cell lymphoma/leukemia) (Working Formulation), T-immunoblastic sarcoma (Adult T-cell lymphoma/leukemia) (Lukes-Collins Classification), Adult T-cell lymphoma/leukemia, T-immunoblastic sarcoma (Adult T-cell lymphoma/leukaemia) (Lukes-Collins Classification), Diffuse small cleaved cell lymphoma (Adult T-cell lymphoma/leukaemia) (Working Formulation), Pleomorphic small T-cell HTLV1 lymphoma (Kiel Classification), Pleomorphic medium sized and large T-cell HTLV1 lymphoma (Kiel Classification), Diffuse mixed small and large cell lymphoma (Adult T-cell lymphoma/leukaemia) (Working Formulation), Diffuse large cell lymphoma (Adult T-cell lymphoma/leukaemia) (Working Formulation), Adult T-cell lymphoma/leukaemia NOS, Adult T-cell leukemia-lymphoma, Total white blood cell count, Polymorphonuclear count, White blood cell count NOS, Leukocyte count NOS, White cells, WBC count, WBC, White blood cells, GTT abnormal, Abnormal glucose tolerance test (excl DM), Glucose tolerance test abnormal NOS, Abnormal glucose tolerance test, Glucose tolerance curve abnormal, Diabetic type curve, Invasive candidiasis, Candidemia, Candidaemia, Disseminated candidiasis, Systemic moniliasis, Systemic candidiasis, Septicaemia due to pseudomonas, Septicemia pseudomonal, Septicemia due to pseudomonas, Septicaemia pseudomonal, Other bacterial pneumonia, Pneumonia due to other specified bacteria, Pneumonia due to other gram-negative bacteria, Pneumonia gram-positive bacterial, Pneumonia gram-negative bacterial NOS, Pneumonia due to anaerobes, Pneumonia anaerobic bacterial NOS, Bacterial pneumonia, unspecified, Pneumonia bacterial NOS, Human immunodeficiency virus type 2 infection, Human immunodeficiency virus infection causing specified disease of the central nervous system, Human immunodeficiency virus infection, unspecified, Human immunodeficiency virus infection causing other disorders involving the immune mechanism, Human immunodeficiency virus infection causing lymphadenopathy, Human immunodeficiency virus infection with specified malignant neoplasms, Human immunodeficiency virus infection with specified conditions, Human immunodeficiency virus, type 2 infection in conditions classified elsewhere and of unspec site, Human immunodeficiency virus type I infection with specific secondary infections, Human immunodeficiency virus, type 2 infection in conditions classified elsewhere and of unspec sit, Human T-cell lymphotropic virus, type II infection in cond class elsewhere and of unspec site, Human immunodeficiency virus infection causing specified acute infections, Other human immunodeficiency virus infection, Human immunodeficiency virus infection causing other specified conditions, Human immunodeficiency virus infection causing other specified infections, Human immunodeficiency virus type, Human immunodeficiency virus infection with specified infections, Human T-cell leukemia virus III, HIV disease progression, Chronic infection with HIV, Human T-cell lymphotropic virus type III infection, HIV-2, HIV-2 infection, HIV-1, HIV infection NOS, HIV infection with specific secondary infections, Human immunodeficiency virus syndrome, Human T-cell leukaemia virus III, Chronic HIV infection, HIV disease, Escherichia bacteremia, Escherichia coli bacteraemia, Escherichia coli bacteremia, Enterococcal faecalis infection, Glycopeptide antibiotic resistant enterococci, Enterococcus faecium infection, Vancomycin-resistant enterococcal infection, Enterococcal faecalis infection, Enterococcal infection NOS, Glycopeptide antibiotic resistant enterococcal infection, Enterococcal bacteremia, Unspecified miliary tuberculosis, tubercle bacilli found (in sputum) by microscopy, Unspecified miliary tuberculosis, bacteriological or histological examination not done, Other specified miliary tuberculosis, bacteriological or histological examination not done, Other specified miliary tuberculosis, bact or hist exam unknown, Unspecified miliary tuberculosis, bacteriological or histological examination unknown (at present), Other specified miliary tuberculosis, tubercle bacilli found (in sputum) by microscopy, Other specified miliary tuberculosis, unspecified examination, Other specified miliary tuberculosis, Acute miliary tuberculosis, bacteriological or histological examination unknown (at present), Acute miliary tuberculosis, bacteriological or histological examination not done, Acute tuberculosis, Acute miliary tuberculosis, unspecified examination, Acute miliary tuberculosis, Unspecified miliary tuberculosis, confirmed histologically, Other specified miliary tuberculosis, confirmed histologically, Acute miliary tuberculosis, confirmed by animal inoculation, Miliary tuberculosis, Miliary tuberculosis, unspecified, Miliary tuberculosis, acute, Unspecified miliary tuberculosis, confirmed by animal inoculation, Unspecified miliary tuberculosis, confirmed by bacterial culture, Other specified miliary tuberculosis, confirmed by animal inoculation, Other specified miliary tuberculosis, confirmed by bacterial culture, Acute miliary tuberculosis, confirmed histologically, Acute miliary tuberculosis, confirmed by bacterial culture, Unspecified miliary tuberculosis, unspecified examination, Unspecified miliary tuberculosis, Acute miliary tuberculosis, tubercle bacilli found (in sputum) by microscopy, Mycobacterium tuberculosis disseminated, Miliary TB, Metastatic neoplasm, Disseminated TB, Metastases to lung, Septicemia candida, Bile duct cancer, Septicemia due to other gram-negative organisms, Adult T-cell lymphoma/leukaemia, Septicaemia due to other gram-negative organisms, White blood cell count, Other septicemia due to gram-negative organisms, Hepatic enzyme, Septicaemia due to gram-negative organism, unspecified, Glucose tolerance test abnormal, Septicemia gram-positive, Bilirubin urine, Septicemia gram-negative, Systemic candida, Septicemia bacterial anaerobic, Pseudomonal sepsis, Septicaemia candida, Bacterial sepsis, Pneumonia bacterial, Septicaemia gram-positive, HIV infection, Septicaemia bacterial anaerobic NOS, Escherichia bacteraemia, Septicemia due to gram-negative organism, unspecified, Enterococcal bacteraemia, Septicemia due to anaerobes, Disseminated tuberculosis, Septicaemia due to anaerobes, Candida sepsis, Septicaemia gram-negative NOS, Infusion related reaction

**Cluster No. 6 (Linkage Score: 17)****Number of Nodes (details below): 60 - Number of Edges: 1020**

Pyogenic granuloma, Lichenification and lichen simplex chronicus, Lichenoid changes mouth, Ectopic testis, Cryptorchidism, Undescended testis, Testicle maldescended, Maldescended testis, Testicle undescended, Maldescended testicle, Undescended testicle, Forestier and Rotes-Querol syndrome, Forestier disease, Ankylosing vertebral hyperostosis, Protein total high, Total protein high, Serum total protein increased, Partial pressure CO2 increased, PCO2 elevated, Raised CO2 tension, Mean cell haemoglobin low, Mean cell hemoglobin decreased, Mean cell hemoglobin low, MCH decreased, Mean cell hemoglobin concentration increased, Haptoglobin high, Haptoglobin low, Iron high, Lichenification, Iron increased, Lymphoma cutis, Plasma iron increased, Senile ankylosing vertebral hyperostosis, Serum iron increased, Intervertebral disc space narrowing, Iron serum increased, Protein total increased, Serous discharge, PCO2 increased, Abnormal pupillary function, unspecified, Mean cell haemoglobin decreased, Other anomalies of pupillary function, Mean cell haemoglobin concentration increased, Pupillary abnormalities, Haptoglobin increased, Anomalies of pupillary function, Haptoglobin decreased, Pupillary disorder NOS, Blood iron increased, Loss of eyelashes, Secretion discharge, Eyebrow loss of, Pupillary disorder, Eye muscle weakness, Madarosis, Nipple supernumerary, Extraocular muscle paresis, Supernumerary nipple, Pyogenic granuloma of skin and subcutaneous tissue, Cryptorchism



**Cluster No. 7 (Linkage Score: 16)****Number of Nodes (details below): 78 - Number of Edges: 1248**

Acquired afibrinogenaemia, Polycystic ovarian syndrome, Stein-Leventhal syndrome, Polycystic ovary, Acquired afibrinogenemia, Hypobulia (abulia), Cerebral degeneration, Senile degeneration of brain, Circumscribed cerebral atrophy, Hyperhomocysteinemia, Androgens NOS high, Androgens NOS increased, Other congenital valgus deformities of feet, Valgus deformities of feet, congenital, Other congenital varus deformities of feet, Varus deformities of feet, congenital, Pes supinatus, Congenital valgus foot deformity, Clubfoot, Talipes, unspecified, Metatarsus varus, congenital, Congenital valgus deformity of foot NOS, Talipes congenital, Fetal talipes, Clubfoot (congenital), Talipes cavus, Talipes calcaneovalgus, Talipes valgus, congenital, Talipes equinovarus, congenital, Talipes varus, congenital, Congenital metatarsus varus, Congenital varus deformity of foot NOS, Foetal talipes, Talipes equinus, Talipes equinovarus, Congenital pes cavus, Congenital clubfoot, Club foot congenital, Talipes equines, Porencephalic cyst, Porencephalus, Porencephalia, Coarctation of aorta (preductal) (postductal), Aortic coarctation, Coarctation of aorta, Other specified infantile cerebral palsy, Hemiplegic infantile cerebral palsy, Infantile cerebral palsy, monoplegic, Polycystic ovaries, Infantile cerebral palsy, unspecified, Pseudodementia, Quadriplegic infantile cerebral palsy, Abulia, Spastic palsy (infantile), Neurodegenerative disorder, Infantile cerebral palsy, quadriplegic, Cerebral atrophy, Infantile cerebral palsy, hemiplegic, Hyperhomocysteinaemia, Infantile cerebral palsy, diplegic, Carnitine deficiency, Infantile hemiplegia, Bleeding time abnormal, Monoplegic infantile cerebral palsy, Androgens increased, Diplegic infantile cerebral palsy, Pseudocyst, Infantile cerebral palsy, Pancreatic necrosis, Congenital spasticity, Talipes, Spasticity congenital, Porencephaly, Paralysis spastic congenital, Coarctation of the aorta, Palsy cerebral, Clinodactyly, Cerebral palsy

**Cluster No. 8 (Linkage Score: 15.614)****Number of Nodes (details below): 57 - Number of Edges: 890**

Alpha-1 anti-trypsin increased, Coagulation factor VIII level high, Hemangioma of liver, Thrombosis eye, Retinal vascular thrombosis NOS, Solitary cyst of breast, Cyst breast, Vaginal adenocarcinoma, Vaginal neoplasm malignant, Squamous cell carcinoma of the vagina, Malignant neoplasm of vagina, Cancer of vagina, Vaginal cancer NOS, Leydig cell tumor of the testis, Gonadostromal tumor of the testis, Adrenal rest tumor of the testis, Non-seminoma testicular cancer, Malignant neoplasm of testis, undescended, Malignant neoplasm of other and unspecified testis, Mensenchymal neoplasm of the testis, Leydig cell tumour of the testis, Gonadostromal tumour of the testis, Adrenal rest tumour of the testis, Adenocarcinoma of the rete testis, Testicular cancer, Malignant neoplasm of testis, other and unspecified, Malignant neoplasm of undescended testis, Malignant neoplasm of testis, Testis cancer (excl germ cell), Thyroxin binding globulin increased, Testis neoplasm malignant, Coagulation factor VIII level increased, Carcinoma testes, Haemangioma of liver, Colorectal adenocarcinoma, Retinal vascular thrombosis, Colorectal carcinoma, Breast cyst, Colorectal cancer NOS, Vaginal cancer, Cervical adenosquamous carcinoma, Testis cancer, Plasminogen activity increased, Colorectal cancer, Plasminogen high, Adenosquamous carcinoma of the cervix, Plasminogen increased, Coagulation factor XII level increased, Coagulation factor VII level high, Coagulation factor X level increased, Coagulation factor IX level high, Coagulation factor VII level increased, Ceruloplasmin high, Coagulation factor IX level increased, Ceruloplasmin increased, Alpha-1 anti-trypsin high, Estrogenic effect

**Cluster No. 9 (Linkage Score: 14.618)****Number of Nodes (details below): 68 - Number of Edges: 994**

Oestradiol decreased, Acquired atrophy of ovary and fallopian tube, Atrophy ovary, Urinary obstruction unspecified, Urinary tract obstruction NOS, Other ureteric obstruction, Occlusion of ureter NOS, Ureter obstruction, Obstruction ureter, Tumor flare, Throat cancer NOS, Urine oestradiol decreased, Urine estradiol decreased, Estradiol decreased, Blood estradiol decreased, Estradiol low, Oestradiol low, Blood oestradiol decreased, Somatotropin abnormal, Somatotropin abnormal NOS, Somatotrophin abnormal NOS, Growth hormone abnormal, GH abnormal, Serum growth hormone abnormal, Plasma growth hormone abnormal, Scrotal hematoma, Other open fractures of distal end of radius (alone), Fracture of unspecified part of radius (alone), closed, Fracture of shaft of radius (alone), closed, Fracture of unspecified part of radius (alone), open, Other closed fractures of distal end of radius (alone), Fracture of shaft of radius (alone), open, Other and unspecified open fractures of proximal end of radius (alone), Fractures of proximal end of radius (alone), other and unspecified closed, Fractured radial styloid process, Barton's fracture, Fracture of head of radius, open, Fracture of neck of radius, closed, Radial head fracture, Colles' fracture, open, Fracture, closed, colles', Pleural rub, Fracture of neck of radius, open, Testis discomfort, Fracture of head of radius, closed, Ovarian atrophy, Smith's fracture, Urinary tract obstruction, Fractured radial head, Ureteric obstruction, Fracture Colles', Tumour flare, Colles' fracture, Throat cancer, Scrotal infection NOS, Blood growth hormone abnormal, Listeria infection, Scrotal haematoma, Listeria monocytogenes infection, Radius fracture, Injection site parasthesia, Scrotal infection, Injection site paresthesia, Listeriosis, Expulsion of implant, Injection site paraesthesia, Implant expulsion, Rectal polyp

**Cluster No. 10 (Linkage Score: 13.955)****Number of Nodes (details below): 44 - Number of Edges: 614**

Blood pH abnormal, Microangiopathy NOS, Generalized arterial disease, Arteriopathy, Urge incontinence syndrome, Upper limb paresis, Leg paresis, Limb paresis, Right arm paresis, Left arm paresis, Coma vigil, Locked-in state, Akinetic mutism, Insulin-dependent diabetes mellitus, Type I diabetes mellitus, Insulin dependent diabetic, Ketosis-prone diabetes mellitus, Diabetes brittle, Pancreatogenous diabetes, Microangiopathy, Type I diabetes mellitus without mention of complication, Arteriopathic disease, Brittle diabetes, Brain hypoxia, IDDM, Urge incontinence, Juvenile diabetes, Glomerular vascular disorder, Epstein-Barr virus infection recurrent, Monoparesis, EBV infection reactivation, Diabetes mellitus insulin-dependent, Epstein-Barr virus infection reactivation, Locked-in syndrome, Diabetes mellitus juvenile onset, Epstein-Barr virus infection, Impetigo bullosa, Megakaryocytes decreased, EBV infection, Bullous impetigo, Gastroesophagitis, Pancreatic pseudocyst, Gastroesophagitis, Cardiomyopathy neonatal

**Cluster No. 11 (Linkage Score: 13.111)****Number of Nodes (details below): 36 - Number of Edges: 472**

Microphthalmos, Other anomalies of great veins, Anomalies of great veins, congenital, Congenital great vessel anomaly NOS, Anomaly of great veins, congenital, unspecified, Congenital great vein anomaly NOS, Refractory Wegener's granulomatosis, Necrotising granulomatous vasculitis, Necrotizing granulomatous vasculitis, Wegeners granulomatosis, ATRA syndrome, Acne fulminans, Exercise induced asthma, Wegener's granulomatosis, Scrotum ulceration, Retinoic acid syndrome, Agraphesthesia, Lower respiratory tract inflammation, Astereognosis, Asthma exercise induced, Scrotum erosion, Agnosia, Scrotal ulcer, Microphthalmos associated with other anomalies of eye and adnexa, Tendon calcification, Microphthalmos, unspecified, White blood cells urine, Simple microphthalmos, Application site discomfort, Microphthalmia, Thymus hypoplasia, Hypertelorism, Optic nerve hypoplasia, Congenital microphthalmos, Hypertelorism of orbit, Congenital great vessel anomaly

**Cluster No. 12 (Linkage Score: 11.558)****Number of Nodes (details below): 43 - Number of Edges: 497**

Tear discolouration, Black coloured sweating, Sweat discoloration, Colored sweat, Coloured sweat, Black colored sweating, Biliuria, Urine bilious, Tear discoloration, Red man, Red man's syndrome, Nephritis and nephropathy, not spec as acute or chronic, with lesion of rapidly progressive glomneph, Glomerulonephritis rapidly progressive chronic, Crescentic glomerulonephritis, Adenocarcinoma of lung stage unspecified, Adenocarcinoma of lung, Lung adenocarcinoma NOS, Adenocarcinoma lung, Vitamin D decreased NOS, Uric acid result, Urate, Sweat discolouration, Plasma uric acid, Red man syndrome, Serum uric acid, Glomerulonephritis rapidly progressive, Blood 1,25-dihydroxy vitamin D decreased, Choloria, Dysyntery, Lung adenocarcinoma, Dysentery recurrent, Vitamin D decreased, Dysentery NOS, Urine vitamin K decreased, Saliva discoloration, Blood uric acid, Alcoholic gastritis, without mention of haemorrhage, Blood 1,25-dihydroxycholecalciferol decreased, Alcoholic gastritis, Dysentery, Alcoholic gastritis, without mention of hemorrhage, Saliva discolouration, Gastritis alcoholic

**Cluster No. 13 (Linkage Score: 10.846)****Number of Nodes (details below): 26 - Number of Edges: 282**

Aural polyp, Auditory canal polyp, Ear polyp, Other acute myringitis without mention of otitis media, Tympanic membrane infection, Myringitis NOS, Acute myringitis, unspecified, Vasculitic rash, Chronic myringitis without mention of otitis media, Pharyngeal polyp, Acute myringitis without mention of otitis media, Bone formation decreased, Fungal esophagitis, Creatinine urine decreased, Other infective dermatitis of eyelid, Pharyngeal candidiasis, Infective dermatitis of eyelid of types resulting in deformity, Nasal candidiasis, Eczematous dermatitis infected, Myringitis, Pustular eczema, Herpetic stomatitis, Infected eczema, Fungal oesophagitis, Eczema infected, Dental discomfort

**Cluster No. 14 (Linkage Score: 10)****Number of Nodes (details below): 62 - Number of Edges: 620**

Eustachian tube dysfunction, Pulmonary thrombosis NOS, Thrombosis pulmonary, Dysfunction of Eustachian tube, Contracture, Post poliomyelitic contracture, Contractures NOS, Volkmann's ischaemic contracture, Volkmann's ischemic contracture, Post-traumatic muscle contracture, Fragility capillary increased, Rumpel-Leede reaction positive, Positive Hess test, Increased capillary fragility, Blood sugar level fluctuation, Haemorrhage lips, Lip hemorrhage, Bleeding lips, Hemorrhage lips, Degenerated globe or eye, unspecified, Degenerated conditions of globe, Other degenerative disorders of globe, Degenerative disorders of globe, Degenerative disorder of globe, unspecified, Eye degenerative disorder NOS, Other background retinopathy and retinal vascular changes, Diabetic retinal angiopathy, Diabetic neovascularization, Non-proliferative diabetic retinopathy, Background diabetic retinopathy, Diabetic macular retinopathy, Retinopathy background, Background retinopathy, unspecified, Proliferative diabetic retinopathy, Retinopathy diabetic, Diabetic neovascularisation, Hypoestrogenemia, Hypoestrogenaemia, Other marginal perforation of tympanic membrane, Multiple perforations of tympanic membrane, Central perforation of tympanic membrane, Marginal perforation of tympanum, Perforated eardrum, Pulmonary thrombosis, Total perforation of tympanic membrane, Neck mass, Attic perforation of tympanic membrane, Muscle contracture, Perforation of tympanic membrane, unspecified, Capillary fragility increased, Perforation of tympanic membrane, Blood glucose fluctuation, Central perforation of tympanum, Lip haemorrhage, Attic perforation of tympanum, Eye degenerative disorder, Trauma ear drum, Diabetic retinopathy, Estrogen deficiency, Tympanic membrane perforation, Oestrogen deficiency, Ear drum perforation



**Cluster No. 15 (Linkage Score: 10)****Number of Nodes (details below): 77 - Number of Edges: 770**

Gastroduodenal haemorrhage, Bateman's purpura senilis, Gastroduodenal hemorrhage, Chronic disease of tonsils and adenoids, Unspecified chronic disease of tonsils and adenoids, Other chronic disease of tonsils and adenoids, Tonsillolith, Cryptic tonsil, Adenoid vegetations, Chronic tonsillar disease, Other lesion of median nerve, Median nerve lesion NOS, Malignant neoplasm of nipple and areola of female breast, Malignant neoplasm of breast (female), unspecified, Malignant neoplasm of other specified sites of female breast, Squamous cell breast cancer female, Malignant neoplasm of female breast, unspecified, Malignant neoplasm of lower-outer quadrant of female breast, Malignant neoplasm of upper-inner quadrant of female breast, Breast cancer female NOS, Mucinous ductal breast carcinoma, Malignant neoplasm of female breast, Malignant neoplasm of axillary tail of female breast, Malignant neoplasm of upper-outer quadrant of female breast, Malignant neoplasm of lower-inner quadrant of female breast, Malignant neoplasm of central portion of female breast, Breast neoplasm malignant female, Ionized calcium decreased, Calcium ionized decreased, Closed fractures of carpal bones, Open fractures of carpal bones, Open fracture of carpal bone, unspecified, Open fracture of trapezoid bone (smaller multangular) of wrist, Open fracture of triquetral (cuneiform) bone of wrist, Closed fracture of lunate (semilunar) bone of wrist, Fractured wrist, Broken wrist, Navicular fracture, Open fracture of other bone of wrist, Open fracture of hamate (unciform) bone of wrist, Open fracture of capitate bone (os magnum) of wrist, Open fracture of trapezium bone (larger multangular) of wrist, Open fracture of pisiform bone of wrist, Open fracture of lunate (semilunar) bone of wrist, Open fracture of navicular (scaphoid) bone of wrist, Closed fracture of other bone of wrist, Closed fracture of hamate (unciform) bone of wrist, Closed fracture of capitate bone (os magnum) of wrist, Closed fracture of trapezoid bone (smaller multangular) of wrist, Closed fracture of trapezium bone (larger multangular) of wrist, Closed fracture of pisiform bone of wrist, Closed fracture of triquetral (cuneiform) bone of wrist, Closed fracture of navicular (scaphoid) bone of wrist, Closed fracture of carpal bone, unspecified, Fracture of carpal bone(s), Fractured scaphoid, Fractured pisiform, Fractured carpal, Purpura senile, Meniscopathy, Tonsillar disorder, Catrilage tear in knee, Median nerve lesion, Cartilage damage, Breast cancer female, Cartilage tear in knee, Calcium ionised decreased, Lip infection, Wrist fracture, Spider bite allergic reaction, Cartilage injury, Infected lip, Allergy to arthropod bite, Lower gastrointestinal hemorrhage, Oral infection, Insect bite allergy, Lower gastrointestinal haemorrhage

**Cluster No. 16 (Linkage Score: 9.8)****Number of Nodes (details below): 50 - Number of Edges: 490**

Pituitary haemorrhage, Bladder wart, Papilloma of bladder, Pituitary apoplexy, Pituitary hemorrhage, Gallbladder tumor, Gallbladder tumour, Biliary neoplasia, Biliary neoplasm NOS, Neoplasm biliary tract, Effusion of ankle and foot joint, Effusion of joint of multiple sites, Effusion of joint of other specified sites, Effusion of joint of pelvic region and thigh, Effusion of joint, site unspecified, Effusion of forearm joint, Wrist effusion, Joint effusion aggravated, Effusion of lower leg joint, Effusion of hand joint, Effusion of upper arm joint, Effusion of joint of shoulder region, Ankle effusion, Knee effusion, Effusion of joint, Elbow effusion, Effusion of knee, Effusion of ankle, Effusion of wrist, Effusion of elbow, Effusion (r) knee, Effusion (l) knee, Bladder papilloma, Hydrarthrosis, Biliary neoplasm, Renal and perinephric abscess, Joint effusion, Renal abscess NOS, Iron deficiency, Kidney abscess, Vitamin B12 decreased, Abscess kidney, Mean arterial pressure increased, Choledochal dilatation, Renal abscess, Dilatation biliary tract, Microlithiasis, Biliary dilatation, Microlithiasis NOS, Injection site rash

**Cluster No. 17 (Linkage Score: 9)****Number of Nodes (details below): 26 - Number of Edges: 234**

Myeloid maturation arrest, Urinary tract pain NOS, Marrow maturation arrest, Very few granulocyte precursors, Maturation arrest myeloid, Maturation arrest marrow, Arrest myeloid maturation, Encephalopathy aluminium, Drug-induced encephalopathy, Encephalopathy aluminium, Aura NOS, Urinary tract pain, Astatic seizure, Toxic induced encephalopathy, Akinetic seizures, Aura, Tri-iodothyronine low, Atonic seizures, 3,5,3-triiodothyronine decreased, Periarticular disorder, Hypodipsia, Tri-iodothyronine decreased, Oligodipsia, T3 decreased, Histone antibody positive, Blood testosterone free increased

**Cluster No. 18 (Linkage Score: 9)****Number of Nodes (details below): 35 - Number of Edges: 315**

Aortic valve stenosis, Rheumatic aortic stenosis, Stenosis aortic valve, Parathyroid transitional clear cell adenoma, Parathyroid mixed cell type adenoma, Parathyroid chief cell adenoma, Benign neoplasm of parathyroid gland, Parathyroid adenoma, Low turnover bone disease, Adynamic bone disease, Folliculitis pityrospora, Pityriasis versicolor, Malassezia infection, Pityriasis versicolor, Tinea versicolor, Hidradenitis suppurativa, Creutzfeld-Jakob disease, Jakob-Creutzfeldt disease, CJD, Cerebellar atrophy, CJD, Parathyroid tumour benign, Creutzfeldt-Jakob agent infection, Low turnover osteopathy, Creutzfeld-Jacob disease, Tinea versicolor, Jakob-Creutzfeldt disease, Sweat gland infection, Darier's disease, Creutzfeldt-Jakob disease, Hyperreflexia, Parathyroid gland enlargement, Startle disease, Keratosis follicular, Hyperreflexia

**Cluster No. 19 (Linkage Score: 9)****Number of Nodes (details below): 59 - Number of Edges: 531**

Congenital bladder anomaly, Other specified congenital anomalies of bladder and urethra, Bladder malformation, Congenital bladder anomaly NOS, Retained portions of placenta or membranes, w/o hemorrhage, postpart condition or comp, Retained portions of placenta or membranes, w/o hemorrhage, unspec as to eoc, Retained portions of placenta or membranes, without hemorrhage, unspecified as to episode of care, Retained placenta without hemorrhage, unspecified as to episode of care, Retained portions of placenta or membranes, without hemorrhage, Retained portions of placenta or membranes, without haemorrhage, Retained portions of placenta or membranes, w/o hemorrhage, delivered, with ment of postpart comp, Retained portions of placenta or membranes, without hemorrhage, postpartum condition or complication, Retained placenta without hemorrhage, postpartum condition or complication, Retained placenta without hemorrhage, with delivery, with mention of postpartum complication, Retained placenta or membranes, without haemorrhage, Placental incarceration, Retained placenta without haemorrhage, Retained placenta without hemorrhage, Retained placenta or membranes, without hemorrhage, Retained placenta, Delayed and secondary postpartum hemorrhage, with delivery, Delayed and secondary postpartum hemorrhage, postpartum, Other immediate postpartum hemorrhage, with delivery, Other immediate postpartum hemorrhage, Delayed and secondary postpartum haemorrhage, Other immediate postpartum haemorrhage, Delayed and secondary postpartum hemorrhage, unspecified as to episode of care, Delayed and secondary postpartum hemorrhage, Other immediate postpartum hemorrhage, unspecified as to episode of care, Post-partum haemorrhage, Other immediate postpartum haemorrhage, postpartum, Haemorrhage postpartum, Postpartum hemorrhage (secondary), Postpartum hemorrhage (primary), Postpartum haemorrhage (primary), Other immediate postpartum hemorrhage, postpartum, Postpartum hemorrhage, Postpartum haemorrhage (secondary), Postpartum haemorrhage NOS, Hemorrhage postpartum, Bleeding postpartum, Cerebrovascular disorder fetal, Fetal cerebrovascular disorder, Cerebrovascular disorder foetal, Cerebrovascular disorder NOS foetal, Moebius II syndrome, Mobius' II syndrome, Retained placenta or membranes, Congenital facial diplegia, Postpartum haemorrhage, Congenital paralysis of 6th and 12th cranial nerves, Foetal cerebrovascular disorder, Mobius II syndrome, Microtia, Holoprosencephaly, Congenital hydrocephalus, Congenital multiplex arthrogryposis, Hydrocephalus congenital, Congenital cerebral cyst

**Cluster No. 20 (Linkage Score: 9)****Number of Nodes (details below): 87 - Number of Edges: 783**

Sickle cell anaemia, Costoclavicular syndrome, Cervical rib syndrome, Other sickle-cell anemia, Sickle-cell anaemia, unspecified, Anemia sickle cell, Sickle cell anemia, Drepanocytosis, Sickle-cell anaemia, Sickle-cell anemia, Sickle cell disease, Anaemia sickle cell, HB-S disease without mention of crisis, Sickle-cell anemia, unspecified, Sickle cell disease NOS, Sickle cell disorders, Parathyroid tumour NOS, Parathyroid tumor, Ankylosis of joint of pelvic region and thigh, Ankylosis of joint of multiple sites, Ankylosis of joint of other specified sites, Ankylosis of ankle and foot joint, Ankylosis of elbow, Ankylosis of joint, site unspecified, Ankylosis of joint of shoulder region, Ankylosis, Ankylosis of lower leg joint, Ankylosis of hand joint, Ankylosis of forearm joint, Ankylosis of upper arm joint, Ankylosis of joint, Ankylosis of ankle, Ankylosis of knee, Ankylosis of hip, Injury to ulnar nerve, Fracture of unspecified bone(s) of foot (except toes), closed, Open fracture of other tarsal and metatarsal bones, Other fractures of tarsal and metatarsal bones, open, Other fracture of tarsal and metatarsal bones, closed, Fracture of other tarsal and metatarsal bones, closed, Open fracture of one or more phalanges of foot, Closed fracture of one or more phalanges of foot, Fracture of one or more phalanges of foot, Fracture of unspecified bone(s) of foot (except toes), open, Fracture of other tarsal and metatarsal bones, open, Fracture of one or more tarsal and metatarsal bones, Calcaneus fracture, Fracture of astragalus, closed, Fracture of one or more phalanges of foot, closed, Fracture of navicular (scaphoid) bone of foot, open, Fracture of navicular (scaphoid) bone of foot, closed, Fractured os calcis, Fractured metatarsal, Broken foot, Great toe fracture, Fracture of one or more phalanges of foot, open, Fracture of metatarsal bone(s), open, Fracture of cuneiform bone of foot, open, Fracture of cuboid bone, open, Fracture of astragalus, open, Fracture of metatarsal bone(s), closed, Fracture of cuneiform bone of foot, closed, Fracture of cuboid bone, closed, Fracture of calcaneus, open, Fracture of calcaneus, closed, March fracture, Fractured toe, Bacterial infection due to helicobacter pylori (H. pylori), Helicobacter pylori infection, Gingivitis infection, Thoracic outlet syndrome, Gum infection, Lacunar infarction, Infection of gum, Parathyroid tumour, Gingivitis infection NOS, Joint ankylosis, Sickle cell anemia with crisis, Ulnar nerve injury, HB-S disease with mention of crisis, Foot fracture, Sickle cell crisis, Gingival infection, Hb-SS disease with crisis, Helicobacter infection, Suppuration gum, Sickle cell anaemia with crisis

**Cluster No. 21 (Linkage Score: 9)****Number of Nodes (details below): 28 - Number of Edges: 252**

Application site anaesthesia, Application site hypalgesia, Application site numbness, Application site anesthesia, Anesthesia application site, HDL/cholesterol ratio decreased, Cervical smear, Cervix smear, PAP smear, High vaginal smear, Cervical cytology, Insulin resistance, Endometrial biopsy, Total cholesterol/HDL ratio increased, Trichomoniasis of other specified sites, Smear cervix, Trichomoniasis, unspecified, Biopsy endometrium, Application site discoloration, Trichomoniasis, Gardnerella infection NOS, Application site discolouration, Gardnerella infection, Application site pigmentation changes, Application site abscess, Application site hypopigmentation, Application site scar, Application site hyperpigmentation

**Cluster No. 22 (Linkage Score: 9)****Number of Nodes (details below): 26 - Number of Edges: 234**

Infusion site warmth, Segmented neutrophil percentage increased, Segmented neutrophil percentage decreased, Subdural haemorrhage following injury without mention of open intracranial wound, Subdural haemorrhage following injury, with open intracranial wound, with no loss of consciousness, Subdural hemorrhage following injury, with open intracranial wound, with concussion, unspecified, Subdural hemorrhage following injury, with open intracranial wound, Subdural hemorrhage following injury, with open intracranial wound, with no loss of consciousness, Subdural hemorrhage following injury without mention of open intracranial wound, Neutrophil percentage increased, Hemorrhage subdural, Neutrophil percentage decreased, Subdural hemorrhage, Myelocyte count increased, Haemorrhage subdural, Metamyelocyte count increased, Vaccination site pustule, Subdural haemorrhage, Fungal rash NOS, Abdominal abscess, Pelvic abscess, Abdominal phlegmon, Injection site pustule, Intra-abdominal abscess, Fungal rash, Abdominal abscess NOS



## Cluster No. 23 (Linkage Score: 8.826)

### Number of Nodes (details below): 138 - Number of Edges: 1218

Foetal cardiac disorder, Neonatal tachypnea, Other specified complications of labor and delivery affecting fetus or newborn, Other specified complications of labour and delivery, not elsewhere classified, Other indications for care or intervention related to labour and delivery and not elsewhere class, Unspecified complication of labour and delivery affecting fetus or newborn, Other complications of labour and delivery, not elsewhere classified, Unspecified indication for care or intervention related to labour and delivery, Unspec comp of labor and delivery, with delivery, with or w/o ment of antepar cond, Other spec indications for care or intervention related to labor and delivery, unspec as to eoc, Other indications for care or intervention related to labor and delivery, not elsewhere classified, Unspecified complication of labor and delivery, unspecified as to episode of care, Other complications of labor and delivery, delivered, with mention of postpartum complication, Unspecified complication of labor and delivery, Unspecified complication of labor and delivery affecting fetus or newborn, Other specified complications of labour and delivery affecting fetus or newborn, Unspecified complication of labour and delivery, Other complications of labour and delivery, Other specified indications for care or intervention related to labour and delivery, Unspec comp of labor and delivery, with delivery, with ment of postpar comp, Oth comps of labor and delivery, delivered, with or w/o ment of antepar cond, Unspec indication for care or intervention related to labor and delivery, unspec as to eoc, Unspecified indication for care or intervention related to labor and delivery, antepartum, Unspecified indication for care or intervention related to labor and delivery, delivered, Unspecified indication for care or intervention related to labor and delivery, Other specified indications for care or intervention related to labor and delivery, antepartum, Other specified indications for care or intervention related to labor and delivery, delivered, Other specified indications for care or intervention related to labor and delivery, Unspecified complication of labor and delivery, postpartum condition or complication, Unspecified complication of labor and delivery, antepartum condition or complication, Other complications of labor and delivery, postpartum condition or complication, Other complications of labor and delivery, antepartum condition or complication, Other complications of labor and delivery, unspecified as to episode of care, Other complications of labor and delivery, not elsewhere classified, Other complications of labor and delivery, Labor complication, Complication of labor, Obstetric disorder NOS, Obstetric complication NOS, Complication of labour NOS, Foetal distress, affecting management of mother, unspecified as to episode of care, Fetal distress, affecting management of mother, delivered, Fetal distress before onset of labour, in liveborn infant, Fetal distress, affecting management of mother, unspecified as to episode of care, Fetal distress first noted during labour, in liveborn infant, Foetal distress affecting management of mother, Foetal distress first noted during labour, in liveborn infant, Foetal distress before onset of labour, in liveborn infant, Syndrome foetal distress, Foetal distress, unspecified as to time of onset, in liveborn infant, Foetal distress, affecting management of mother, antepartum, Fetal distress, affecting management of mother, antepartum, Fetal distress affecting management of mother, Fetal distress, unspecified as to time of onset, in liveborn infant, Fetal distress first noted during labor, in liveborn infant, Fetal distress before onset of labor, in liveborn infant, Fetal distress syndrome, Intra-uterine hypoxia, Syndrome fetal distress, Foetal distress, Fetal distress, Fetal cardiac disorder, Delayed delivery of second twin, triplet, etc., unspecified as to episode of care, Delayed delivery after artificial rupture of membranes, unspecified as to episode of care, Delayed delivery of second twin, triplet, etc., delivered, Delayed delivery after spontaneous or unspecified rupture of membranes, antepartum, Delayed delivery after spontaneous or unspecified rupture of membranes, delivered, Delayed delivery of second twin, triplet, etc., antepartum, Delayed delivery of second twin, triplet, etc., Delayed delivery after artificial rupture of membranes, antepartum, Delayed delivery after artificial rupture of membranes, delivered, Delayed delivery after spontaneous or unspecified rupture of membranes, Delayed delivery after artificial rupture of membranes, Delivery delayed, Other antepartum hemorrhage, Antepartum haemorrhage associated with coagulation defects, Other specified haemorrhage in early pregnancy, Antepartum haemorrhage, abruptio placentae, and placenta praevia, Antepartum hemorrhage associated with coagulation defects, unspecified as to episode of care, Antepartum hemorrhage, abruptio placentae, and placenta previa, Other specified hemorrhage in early pregnancy, unspecified as to episode of care, Other forms of placental separation and haemorrhage affecting fetus or newborn, Other antepartum haemorrhage, Other antepartum hemorrhage, antepartum, Other antepartum hemorrhage, with delivery, Other antepartum hemorrhage, unspecified as to episode of care, Antepartum hemorrhage associated with coagulation defect, antepartum, Antepartum hemorrhage associated with coagulation defects, with delivery, Antepartum hemorrhage associated with coagulation defects, Other specified hemorrhage in early pregnancy, antepartum, Other specified hemorrhage in early pregnancy, delivered, Other specified hemorrhage in early pregnancy, Other forms of placental separation and hemorrhage affecting fetus or newborn, Hemorrhage in pregnancy, Unspecified haemorrhage in early pregnancy, unspecified as to episode of care, Unspecified haemorrhage in early pregnancy, delivered, Unspecified haemorrhage in early pregnancy, antepartum, Unspecified antepartum haemorrhage, with delivery, Unspecified antepartum haemorrhage, unspecified as to episode of care, Unspecified antepartum haemorrhage, antepartum, Haemorrhage pregnancy, Haemorrhage placental, Haemorrhage of pregnancy, Hemorrhage in early pregnancy, unspecified, Antepartum hemorrhage, Unspecified hemorrhage in early pregnancy, antepartum, Unspecified antepartum haemorrhage, Haemorrhage in early pregnancy, unspecified, Unspecified hemorrhage in early pregnancy, unspecified as to episode of care, Hemorrhage placental, Unspecified haemorrhage in early pregnancy, Unspecified antepartum hemorrhage, antepartum, Unspecified antepartum hemorrhage, with delivery, Unspecified antepartum hemorrhage, unspecified as to episode of care, Unspecified antepartum hemorrhage, Unspecified hemorrhage in early pregnancy, delivered, Unspecified hemorrhage in early pregnancy, Hemorrhage in early pregnancy, Hemorrhage of pregnancy, Haemorrhage in early pregnancy, Hemorrhage pregnancy, Haemorrhage in pregnancy, Late onset neonatal pneumonia, Neonatal tachypnoea, Other infection specific to the perinatal period, Labour complication, Infections specific to the perinatal period, Foetal distress syndrome, Early onset neonatal pneumonia, Neonatal infection, Delayed delivery, Neonatal infection NOS, Antepartum haemorrhage, Perinatal infection NOS, Neonatal pneumonia, Infection in the neonate, Fever neonatal, Vomiting neonatal

## Cluster No. 24 (Linkage Score: 8.654)

### Number of Nodes (details below): 26 - Number of Edges: 225

Cerebellar artery occlusion, Stricture of artery, Arterial stenosis NOS, Gastrointestinal ischemia, Spasm tongue, Aneurysm of splenic artery, Stercoral ulcer of rectum (sphincter), Solitary ulcer of rectum (sphincter), Solitary rectal ulcer, Arterial stenosis, Mesenteric arterial occlusion, Tongue injury, Occlusion mesenteric vein, Tongue spasm, Mesenteric venous occlusion, Splenic artery aneurysm, Ulcer rectal, Mesenteric occlusion, Rectal ulcer, Occlusion mesenteric artery, Rectal stenosis, Occlusion mesenteric, Carotid artery disease, Cerebellar artery obstruction, Gastrointestinal ischaemia, Carotid artery disease NOS

**Cluster No. 25 (Linkage Score: 8)****Number of Nodes (details below): 28 - Number of Edges: 224**

Chondrodystrophy, Achondrogenesis, Achondroplastic dwarf, Congenital dwarfism, Achondroplasia, Neonatal seizures, Convulsions neonatal, Convulsions in newborn, Neonatal fit, Neonatal convulsion, Hypoglycemia unawareness, Cephalohematoma, Cephalhematoma, Cephalohaematoma, Cyanosis neonatal, Walking pneumonia, Convulsion neonatal, Atypical pneumonia, Hypertonia neonatal, Other chronic hepatitis, Hypoglycaemia unawareness, Chronic hepatitis, unspecified, Cephalhaematoma, Primary atypical pneumonia, Chronic hepatitis, Pneumonia primary atypical, Hepatitis chronic NOS, Meningocele

## Cluster No. 26 (Linkage Score: 8)

### Number of Nodes (details below): 18 - Number of Edges: 144

Inborn error of metabolism, Destruction joint, Inborn error of metabolism NOS, Sodium urine low, Sodium urine decreased, Urine osmotic pressure decreased, Joint destruction, Urine osmolality decreased, Urine sodium decreased, Urine osmotic pressure, Urine potassium decreased, Urine osmolality, Urine osmolarity decreased, Urine osmolarity, Glomerular filtration rate, Urine chloride decreased, GFR, Rectal perforation

**Cluster No. 27 (Linkage Score: 8)****Number of Nodes (details below): 45 - Number of Edges: 360**

Spine malformation, Pelvic peritoneal adhesions (female), Female pelvic peritoneal adhesions, Peritubal adhesions, Pelvic adhesions, Other congenital anomalies of spine, Anomaly of spine, congenital, unspecified, Anomalies of spine, congenital, Congenital musculoskeletal deformities of spine, Congenital anomalies of spine, Spine malformation NOS, Congenital spine malformation NOS, Classical migraine with intractable migraine, so stated, Classical migraine without mention of intractable migraine, Migraine with acute onset aura, Migraine with prolonged aura, Migraine hemiplegic, Hemiplegic migraine, Migraine aura, Ophthalmic migraine, Classical migraine, Neoplasm of uncertain behaviour of larynx, Neoplasm of uncertain behavior of larynx, Laryngeal neoplasia, Neoplasm larynx, Laryngeal neoplasm NOS, Gastrointestinal stromal tumor, Apoplastic thyroid cancer, Acid phosphatase serum incr, Phosphatase acid increased, Acid phosphatase serum increased, Pelvic peritoneal adhesions, Acid phosphatase high, Migraine with aura, Acid phosphatase increased, Laryngeal neoplasm, Plasma acid phosphatase increased, Gastrointestinal stromal tumour, Serum acid phosphatase increased, Anaplastic thyroid cancer, Blood acid phosphatase increased, Intestinal adhesions, Middle ear effusion, Abdominal adhesions, Fluid in middle ear

**Cluster No. 28 (Linkage Score: 8)****Number of Nodes (details below): 23 - Number of Edges: 184**

Corneal scar, Cicatrix corneal, Scar corneal, Parsonage-Turner syndrome, Shoulder-girdle syndrome, Phlebitis and thrombophlebitis of intracranial venous sinuses, Nonpyogenic thrombosis of intracranial venous sinus, Non-pyogenic thrombosis of intracranial venous sinus, Intracranial venous sinus thrombosis NOS, Negative thoughts, Thrombosis of venous sinuses, Neuralgic amyotrophy, Withdrawal fits, Lennox-Gastaut syndrome, Withdrawal seizures, Intracranial venous sinus thrombosis, Withdrawal epilepsy, Dyspraxia, Withdrawal convulsions, Fibrin decreased, Drug withdrawal convulsions, Fibrinopenia, Oscillopsia

**Cluster No. 29 (Linkage Score: 8)****Number of Nodes (details below): 32 - Number of Edges: 256**

Oral mucosal petechiae, Other diseases of mediastinum, not elsewhere classified, Mediastinum widened, Mediastinal disorder NOS, Petechiae oral mucosa, Pseudomonas infection in conditions classified elsewhere and of unspecified site, Infection Bacillus pyocyaneus, Infection pseudomonas aeruginosa, Pseudomonas infection NOS, Pseudomonas aeruginosa infection NOS, Mycobacterium avium intracellulare, Mycobacterium avium complex, Mycobacterium avium complex infection recurrent, Mycobacterium avium intracellulare infection, Infection mycobacterium avium, MAC, Pneumonitis pseudomonas, Pneumonia pseudomonas aeruginosa, Mediastinal disorder, Pneumonia due to Pseudomonas, Pseudomonas infection, Pneumonia pseudomonal, Peridiverticular abscess, Catheter site hemorrhage, Mycobacterium avium complex infection, Catheter site ecchymosis, Lung infection pseudomonal, Catheter site bleeding, Central line infection, Catheter site redness, Catheter site haemorrhage, Catheter site erythema

**Cluster No. 30 (Linkage Score: 8)****Number of Nodes (details below): 23 - Number of Edges: 184**

Sensation of foreign body, Nocturnal dyspnea, Foreign body feeling of esophagus, Lump feeling in throat, Globus feeling in pharynx, Foreign body feeling of oesophagus, Tracheal abnormal feeling, Feeling of foreign body, Sensation of foreign body NOS, Pharyngolarynx foreign body feeling, Respiration spontaneous decreased, Hypopnea, Nocturnal dyspnoea, Hypopnoea, Repetitive intrusions of sleep, Allergic sinusitis, Sleep attacks, Sudden onset of sleep, Difficulty in standing, Sleep paralysis, Protein urine 24 hour, Dysstasia, Protein urine



**Cluster No. 31 (Linkage Score: 7.782)****Number of Nodes (details below): 78 - Number of Edges: 607**

Mucosal inflammation, Palmar-plantar erythrodysesthesia, Palmar-plantar erythema, Palmar-plantar erythrodysesthesia syndrome, Hand and foot syndrome secondary to chemotherapy, Hand and foot syndrome, Hand-and-foot syndrome, Infiltration intravenous injection, Injection site leaking, Other ovarian failure, Empty follicle syndrome, Ovarian failure secondary, Ovarian function insufficiency, Ovarian failure primary, Primary ovarian failure, Hypofunction ovarian, TSH inc, Thyroid stimulating hormone increased, Serum thyroid stimulating hormone increased, Thyroid stim. hormone increased, Thyrotropin high, Thyrotropin increased, Thyrotrophin increased, TSH increased, Plasma thyroid stimulating hormone increased, TSH increase, Increased TSH, FSH elevated, Follicle stimulating hormone increased, Serum follicle stimulating hormone increased, Folitropin increased, Folitropin high, FSH increased, Gonadotropic follicle stimulating hormone increased, Plasma follicle stimulating hormone increased, Gonadotropic FSH increased, Follicle-stimulating hormone increased, Other injury to small intestine with open wound into cavity, Injury to other and unspecified gastrointestinal sites without open wound into cavity, Injury to other and unspecified gastrointestinal sites with open wound into cavity, Injury to gastrointestinal tract, unspecified site, without open wound into cavity, Other injury to colon and rectum with open wound into cavity, Injury to rectum with open wound into cavity, Injury to colon or rectum with open wound into cavity, Other injury to small intestine without open wound into cavity, Injury to appendix with open wound into cavity, Injury to gastrointestinal tract, unspecified site, with open wound into cavity, Injury to other and unspecified gastrointestinal sites, with open wound into cavity, Injury to other and unspecified gastrointestinal sites without mention of open wound into cavity, Injury to multiple sites in colon and rectum with open wound into cavity, Other injury to colon and rectum, without open wound into cavity, Injury to multiple sites in colon and rectum without open wound into cavity, Injury to colon or rectum without mention of open wound into cavity, Injury to small intestine with open wound into cavity, Injury to rectum without open wound into cavity, Injury to small intestine without mention of open wound into cavity, Injury to appendix without open wound into cavity, Injury to duodenum with open wound into cavity, Injury to small intestine, unspecified site, with open wound into cavity, Injury to duodenum without open wound into cavity, Injury to small intestine, unspecified site, without open wound into cavity, Injury to stomach with open wound into cavity, Injury to stomach without mention of open wound into cavity, Palmar-plantar erythrodysesthesia syndrome, Injury to gastrointestinal tract, Blood follicle stimulating hormone increased, Gastrointestinal injury NOS, Teratospermia, Mucositis, Ovarian failure, Mucosal inflammation NOS, Calciphylaxis, Mucositis NOS, Blood thyroid stimulating hormone increased, Mucosal sores, Gastrointestinal injury, Inflammation mucous membrane, Injection site extravasation

**Cluster No. 32 (Linkage Score: 7.773)****Number of Nodes (details below): 22 - Number of Edges: 171**

Pericardial rub, Bilirubinuria, Other spinocerebellar diseases, Hepatobiliary disease NOS, Spinocerebellar disorder, Unspecified spinocerebellar disease, Spinocerebellar disease, unspecified, Spinocerebellar disease, Spinocerebellar disorder NOS, Hepatobiliary disease, Haemoglobin, Perianal ulcer, Haematocrit, Stercoral ulcer of anus (sphincter), Electrophoresis abnormal, Solitary ulcer of anus (sphincter), Drug level increased, Ulcer anal, Blood electrolytes increased, Ulceration of anus, Lobar pneumonia, Anal ulcer

**Cluster No. 33 (Linkage Score: 7)****Number of Nodes (details below): 22 - Number of Edges: 154**

Factor V deficiency, Arterial hemorrhage, Arterial haemorrhage NOS, Azotaemia prerenal, Azotemia prerenal, Tumor necrosis, Haemorrhage of liver, Hepatic hemorrhage, Hemorrhage of liver, Arterial haemorrhage, Syndrome Budd-Chiari, Acute prerenal failure, Gastro-oesophageal laceration-haemorrhage syndrome, Tumour necrosis, Gastrooesophageal laceration-haemorrhage syndrome, Hepatic vein thrombosis, Gastroesophageal laceration-hemorrhage syndrome, Budd-Chiari syndrome, Mallory Weiss tear, Hepatic haemorrhage, Budd Chiari syndrome, Mallory-Weiss syndrome

**Cluster No. 34 (Linkage Score: 7)****Number of Nodes (details below): 33 - Number of Edges: 231**

Retinal deposits, Hyperproteinemia, Intraretinal yellow white spot, Globulin serum plasma dec, Globulin serum plasma decreased, Globulin decreased, Infections of kidney, Kidney infection chronic, Chronic kidney infection, Kidney infection acute NOS, Infection of kidney, unspecified, Acute kidney infection, Kidney infection acute, Infection of kidney, Kidney infection chronic NOS, Kidney infection NOS, Toxic effect of other specified noxious substances eaten as food, Toxic effect of aflatoxin and other mycotoxin (food contaminants), Toxic effect of unspecified noxious substance eaten as food, Toxic effect of berries and other plants eaten as food, Hyperproteinaemia, Toxic effect of mushrooms eaten as food, Globulins decreased, Toxic effect of fish and shellfish eaten as food, Periodontal destruction, Toxic effect of noxious substances eaten as food, Kidney infection, Salivary gland abscess NOS, Food poisoning, Abscess of salivary gland, Food poisoning, unspecified, Submandibular mass, Food poisoning NOS

**Cluster No. 35 (Linkage Score: 7)****Number of Nodes (details below): 47 - Number of Edges: 329**

Gingival ulceration, Renal necrosis NOS, Gum ulceration, Ulceration gum, Febrile seizure, Febrile fits, Pyrexial fit, Convulsion febrile, Fever convulsions, Febrile convulsion seizure, Aponeurosis, Fasciitis, unspecified, Fasciitis NOS, Fascitis, Creatinine clearance, Computerized tomography abnormal, Computerized transverse axial tomography abnormal, Computerized transverse axial tomogram abnormal, Computerized axial tomography abnormal, Computerized axial tomogram abnormal, Computerized tomogram abnormal, Whole body CAT abnormal, CT abnormal, CT scan abnormal, Computerised transverse axial tomography abnormal, CTT abnormal, Computerised axial tomography abnormal, CAT abnormal, CAT scan abnormal, Computerised tomography abnormal, Computerised axial tomogram abnormal, CTT scan abnormal, Computerised transverse axial tomogram abnormal, EMI scan abnormal, Renal necrosis, Computer-assisted transaxial tomography abnormal, Febrile convulsion, Anal sphincter injury, Fasciitis, Ulcerative (chronic) proctosigmoiditis, Creatinine renal clearance, Ulcerative (chronic) proctitis, Anal injury, Ulcerative proctitis, Computerised tomogram abnormal, Anal excoriation, Proctitis ulcerative

**Cluster No. 36 (Linkage Score: 7)****Number of Nodes (details below): 28 - Number of Edges: 196**

Hepatobiliary infection, Haemorrhagic shock, Shock hemorrhagic, Hemorrhagic shock, T-cell lymphoma NOS, International normalized ratio decreased, INR decreased, Decreased INR, CPK-MM increased, Unspecified site of spinal cord injury without spinal bone injury, Unspecified site of spinal cord lesion without spinal bone injury, Multiple sites of spinal cord lesion without spinal bone injury, Spinal cord lesion without evidence of spinal bone injury, Unspecified site of spinal cord injury without spinal bone, Spinal cord injury without evidence of spinal bone injury, Shock haemorrhagic, Injury to spine and spinal cord due to birth trauma, T-cell lymphoma, Spinal cord injury NEC, International normalised ratio decreased, Multiple sites of spinal cord injury without spinal bone injury, Blood creatine phosphokinase MM increased, Creatine kinase BB high, Spinal cord injury, Streptococcal bacteremia, Blood creatine phosphokinase BB increased, Late effect of spinal cord injury, Streptococcal bacteraemia

**Cluster No. 37 (Linkage Score: 6.609)****Number of Nodes (details below): 23 - Number of Edges: 152**

Bradycardia neonatal, Osteitis deformans in diseases classified elsewhere, Osteitis deformans without mention of bone tumor, Osteitis deformans without mention of bone tumour, Paget's disease, Paget's disease of bone, Glucocorticosteroid activity incr, Glucocorticosteroid activity increased, Glucocorticoids NOS increased, Upper respiratory tract infection viral NOS, Osteitis deformans, Yeast infection of the mouth, Cortisol free urine decreased, Oral fungal infection NOS, Glucocorticoids increased, Application site fat atrophy, Viral upper respiratory tract infection, Robin's anomalad, Application site atrophy, Robin's syndrome, Oral fungal infection, Atrophy application site, Pierre Robin syndrome

S344

## Cluster No. 38 (Linkage Score: 6.25)

**Number of Nodes (details below): 8 - Number of Edges: 50**

Autoimmune hepatitis, Fontanelle bulging, Biopsy thyroid gland abnormal, Anal inflammation, Tooth hypoplasia, Tooth discolouration congenital, Cataract congenital, Hyperphosphaturia



**Cluster No. 39 (Linkage Score: 6.15)****Number of Nodes (details below): 40 - Number of Edges: 246**

Acute tonsillitis, Acute poliomyelitis, unspecified, Acute poliomyelitis, unspecified, poliovirus type iii, Acute poliomyelitis, unspecified, poliovirus type i, Acute nonparalytic poliomyelitis, poliovirus type iii, Acute nonparalytic poliomyelitis, unspecified type poliovirus, Acute poliomyelitis, unspecified, poliovirus type ii, Acute poliomyelitis, unspecified, poliovirus, unspecified type, Acute nonparalytic poliomyelitis, poliovirus type ii, Acute nonparalytic poliomyelitis, poliovirus type i, Acute nonparalytic poliomyelitis, Acute poliomyelitis with other paralysis, poliovirus type iii, Acute poliomyelitis with other paralysis, poliovirus type ii, Acute poliomyelitis with other paralysis, poliovirus type i, Acute poliomyelitis with other paralysis, unspecified type of poliovirus, Acute poliomyelitis with other paralysis, Acute non-paralytic poliomyelitis, unspecified type poliovirus, Acute non-paralytic poliomyelitis, poliovirus type III, Acute non-paralytic poliomyelitis, poliovirus type II, Acute non-paralytic poliomyelitis, poliovirus type I, Acute non-paralytic poliomyelitis, Poliomyelitis acute, Acute unspecified poliomyelitis, Polio, Polio acute, Poliomyelitis NOS, Acute anterior poliomyelitis, Acute poliomyelitis, Poliomyelitis (acute), Pancreatorenal syndrome, Poliomyelitis, Papilloma, Polio-like paralysis, High density lipoprotein abnormal, Angina tonsillaris, Gastroenteritis cryptosporidial, Tonsillitis acute NOS, Diarrhoea infectious, Acute tonsillitis (excl proven streptococcal), Painful defaecation

**Cluster No. 40 (Linkage Score: 6)****Number of Nodes (details below): 33 - Number of Edges: 198**

Accelerated idioventricular rhythm, Other specific developmental learning difficulties, Other specific learning delay, Learning disorder NOS, Specific learning delay (excl mental retardation), Postherpetic trigeminal neuralgia, Other trigeminal neuralgia, Post-herpetic trigeminal neuralgia, Tic douloureux, Post herpetic trigeminal neuralgia, Tic douloureux, Neuralgia trigeminal, Transient global amnesia, Serum estrogen increased, Plasma estrogen increased, Blood estrogen increased, Estrogen increased, Oestrogen increased, Estrogens increased, Serum oestrogen increased, Plasma oestrogen increased, Coronary vascular spasm, Learning disorder, Coronary artery spasm, Trigeminal neuralgia, Coronary vasospasm, Global amnesia, Spasm coronary artery, Encephalitis herpes, Coronary spasm, Blood oestrogen increased, Herpes simplex encephalitis, Arteriospasm coronary

## Cluster No. 41 (Linkage Score: 6)

### Number of Nodes (details below): 15 - Number of Edges: 90

Coronary artery dissection, Mediastinal emphysema, Renal infarction, Cerebral hemorrhage fetal, Pneumomediastinum, Acquired deformity of nose, Renal infarct, Nose deformity NOS, Cerebral haemorrhage foetal, Necrotizing enterocolitis in fetus or newborn, Nose deformity, Necrotizing enterocolitis neonatal, Congenital brain damage, Necrotising enterocolitis neonatal, Brain damage congenital

**Cluster No. 42 (Linkage Score: 6)****Number of Nodes (details below): 22 - Number of Edges: 132**

Ear haemorrhage, Ear hemorrhage, Bleeding from ears, Chemical conjunctivitis, Chemical keratitis, Unspecified diseases of conjunctiva due to viruses, Other viral conjunctivitis, Viral conjunctivitis, Conjunctivitis viral NOS, Instillation site allodynia, Instillation site stinging, Ear canal injury, Oral papule, Chemical eye injury, Oral mucosa blister, Conjunctivitis viral, Blistering of mouth, Instillation site irritation, Oral mucosa blistering, Instillation site pain, Instillation site burning, Oral mucosal blistering

**Cluster No. 43 (Linkage Score: 6)****Number of Nodes (details below): 53 - Number of Edges: 318**

Blood 1,25-dihydroxycholecalciferol increased, Fracture of rib(s), sternum, larynx, and trachea, Twelfth rib fracture, Eleventh rib fracture, Tenth rib fracture, Ninth rib fracture, Eighth rib fracture, Seventh rib fracture, Sixth rib fracture, Fifth rib fracture, Fourth rib fracture, Third rib fracture, Second rib fracture, First rib fracture, Open fracture of two ribs, Fracture of rib(s), open, Open fracture of eight or more ribs, Open fracture of four ribs, Open fracture of rib(s), unspecified, Closed fracture of seven ribs, Closed fracture of three ribs, Closed fracture of rib(s), Open fracture of multiple ribs, unspecified, Open fracture of seven ribs, Open fracture of six ribs, Open fracture of five ribs, Open fracture of three ribs, Open fracture of one rib, Open fracture of rib(s), Closed fracture of multiple ribs, unspecified, Closed fracture of eight or more ribs, Closed fracture of six ribs, Closed fracture of five ribs, Closed fracture of four ribs, Closed fracture of two ribs, Closed fracture of one rib, Closed fracture of rib(s), unspecified, Fracture rib, Fractured ribs, Gammopathy, Monoclonal gammopathy, IgM gammopathy, IgG gammopathy, IgA gammopathy, Gammopathy NOS, Urine calcium/creatinine ratio decreased, Blood 25-hydroxy vitamin D2 increased, Urine calcium decreased, Blood 25-hydroxycholecalciferol increased, Bone Gla protein decreased, Rib fracture, Blood 1,25-dihydroxy vitamin D increased, Osteocalcin decreased

**Cluster No. 44 (Linkage Score: 6)****Number of Nodes (details below): 23 - Number of Edges: 138**

Enterocolitis infectious, Infectious colitis, enteritis, and gastroenteritis, Colitis, enteritis, and gastroenteritis of presumed infectious origin, Cecal infection, Caecal infection, Infectious colitis, Whiteheads, Respiratory tract hemorrhage, Respiratory tract haemorrhage NOS, Cardiac troponin increased, Platelet aggregation NOS abnormal, Pneumonia due to other viruses not elsewhere classified, Urticaria vesiculosa, Pneumonia due to other virus not elsewhere classified, Milia, Viral pneumonia, Respiratory tract haemorrhage, Viral pneumonia, unspecified, Troponin increased, Aggregation platelet abnormal, Pneumonia viral, Platelet aggregation abnormal, Pneumonia viral NOS

**Cluster No. 45 (Linkage Score: 6)****Number of Nodes (details below): 15 - Number of Edges: 90**

Acanthoma, Other hypertrophic and atrophic conditions of skin, Unspecified hypertrophic and atrophic conditions of skin, Other specified hypertrophic and atrophic conditions of skin, Skin dystrophy NOS, Skin dystrophy, Polymorphic light eruption, Plexiform neurofibroma, Bowen's disease, Lymphomatoid papulosis, Intraepidermal squamous cell carcinoma, Neurofibroma, Intraepidermal carcinoma, Keratoacanthoma, Intra-epidermal carcinoma

S352

**Cluster No. 46 (Linkage Score: 5.714)**

**Number of Nodes (details below): 7 - Number of Edges: 40**

Uterine perforation, Uterine cervical laceration, Uterine hypertonus, Exostosis, Uterine rupture, Iris hyperpigmentation, Growth of eyelashes



S353

**Cluster No. 47 (Linkage Score: 5.714)**

**Number of Nodes (details below): 7 - Number of Edges: 40**

Optic ischaemic neuropathy, Coprolalia, Acoustic stimulation tests abnormal, Pulmonary tuberculosis, Lung abscess, Haemophilus sepsis, Pylorospasm

S354

**Cluster No. 48 (Linkage Score: 5)**

**Number of Nodes (details below): 6 - Number of Edges: 30**

Dysglobulinaemia, Peripheral circulatory failure, Metastases to liver, Urine bilirubin increased, Electrocardiogram PR interval, Leukoplakia oral

**Cluster No. 49 (Linkage Score: 5)**

**Number of Nodes (details below): 6 - Number of Edges: 30**

Neutropenia neonatal, Ovarian fibrosis, Craniosynostosis, Ureteritis, Congenital nose malformation, Blepharophimosis congenital

**Cluster No. 50 (Linkage Score: 5)**

**Number of Nodes (details below): 6 - Number of Edges: 30**

Pernicious anaemia, Thyroxine free decreased, Reverse tri-iodothyronine increased, Pneumoperitoneum, Papillary muscle disorder, Intracardiac thrombus

S357

**Cluster No. 51 (Linkage Score: 5)**

**Number of Nodes (details below): 6 - Number of Edges: 30**

Cardiac failure chronic, Embolism venous, Troponin I increased, Ejection fraction abnormal, Blood creatine phosphokinase MB, Pancreatic disorder

**Cluster No. 52 (Linkage Score: 5)**

**Number of Nodes (details below): 6 - Number of Edges: 30**

Diastolic dysfunction, Chemical cystitis, Respiratory moniliasis, Hepatic infarction, Peritoneal fibrosis, Pancreatic fistula

**Cluster No. 53 (Linkage Score: 5)**

**Number of Nodes (details below): 6 - Number of Edges: 30**

Mitral valve prolapse, Syphilis, Hepatitis B, Carbuncle, Lip blister, Intestinal mass

**Cluster No. 54 (Linkage Score: 5)**

**Number of Nodes (details below): 6 - Number of Edges: 30**

Cerebral atrophy congenital, Yellow nail syndrome, Spinal claudication, B-cell lymphoma, Stress fracture, Congenital cardiovascular anomaly



S361

**Cluster No. 55 (Linkage Score: 5)**

**Number of Nodes (details below): 6 - Number of Edges: 30**

Cleft lip and palate, Fibromatosis, Fibroma, Purple glove syndrome, Blood antidiuretic hormone decreased, Acromegaly

**Cluster No. 56 (Linkage Score: 5)**

**Number of Nodes (details below): 6 - Number of Edges: 30**

Homocystinaemia, Hypoxic encephalopathy, Vitamin D deficiency, Oculomotor study abnormal, Eosinophilic colitis, Urinary tract malformation

S363

**Cluster No. 57 (Linkage Score: 5)**

**Number of Nodes (details below): 6 - Number of Edges: 30**

Conjunctival ulcer, Hypopyon, Hypertrophy, Ileal perforation, Colonic stenosis, Lid margin discharge

S364

**Cluster No. 58 (Linkage Score: 5)**

**Number of Nodes (details below): 6 - Number of Edges: 30**

Aerophagia, Trance, Perseveration, Disinhibition, Communication disorder, Delayed recovery from anaesthesia

S365

**Cluster No. 59 (Linkage Score: 5)**

**Number of Nodes (details below): 6 - Number of Edges: 30**

Gastric atony, Uterine prolapse, Ballismus, Rectal neoplasm, Oesophageal neoplasm, Intervertebral disc disorder

**Cluster No. 60 (Linkage Score: 5)**

**Number of Nodes (details below): 6 - Number of Edges: 30**

Bloody discharge, Vaginal swelling, Vaginal burning sensation, Vulval oedema, Genital erythema, Nonspecific reaction

**Cluster No. 61 (Linkage Score: 5)**

**Number of Nodes (details below): 6 - Number of Edges: 30**

Cellulitis staphylococcal, Anal cancer, Meningitis cryptococcal, Leishmaniasis, Cytomegalovirus colitis, Cerebral toxoplasmosis

**Cluster No. 62 (Linkage Score: 5)**

**Number of Nodes (details below): 6 - Number of Edges: 30**

Duodenal neoplasm, Aortic dissection, Aneurysm ruptured, Hydroureter, Obsessive-compulsive personality disorder, Malignant melanoma in situ



S369

## **Cluster No. 63 (Linkage Score: 4.857)**

### **Number of Nodes (details below): 7 - Number of Edges: 34**

Relapsing fever, Urine glucose false positive, Coombs direct test positive, Urine potassium increased, Vitamin K deficiency, Platelet function test abnormal, Coombs test positive

S370

**Cluster No. 64 (Linkage Score: 4.667)**

**Number of Nodes (details below): 6 - Number of Edges: 28**

Dentofacial anomaly, Oligohydramnios, Neonatal hypotension, Neonatal anuria, Pulmonary hypoplasia, Extremity contracture

S371

**Cluster No. 65 (Linkage Score: 4)**

**Number of Nodes (details below): 5 - Number of Edges: 20**

Blood corticotrophin decreased, Piloerection, Cough decreased, Pulmonary granuloma, Bladder stenosis

**Cluster No. 66 (Linkage Score: 4)**

**Number of Nodes (details below): 5 - Number of Edges: 20**

Lymph node pain, Onchocerciasis, Choroiditis, Chorioretinitis, Anterior chamber disorder

S373

**Cluster No. 67 (Linkage Score: 4)**

**Number of Nodes (details below): 5 - Number of Edges: 20**

Reticuloendothelial dysfunction, Anti-platelet antibody positive, Post procedural haematoma, Adrenal haemorrhage, Endocardial disease

S374

**Cluster No. 68 (Linkage Score: 4)**

**Number of Nodes (details below): 5 - Number of Edges: 20**

Scleral thinning, Anorexia nervosa, Nocardiosis, Amoebiasis, Menopausal disorder

S375

**Cluster No. 69 (Linkage Score: 4)**

**Number of Nodes (details below): 5 - Number of Edges: 20**

Pleuropericarditis, Cerebral arteritis, Bronchioloalveolar carcinoma, Bronchial neoplasm, Vital capacity decreased

S376

**Cluster No. 70 (Linkage Score: 4)**

**Number of Nodes (details below): 5 - Number of Edges: 20**

Alkaptonuria, Kussmaul respiration, Diffuse alveolar damage, Podagra, Occult blood



S377

**Cluster No. 71 (Linkage Score: 4)**

**Number of Nodes (details below): 5 - Number of Edges: 20**

Congenital optic nerve anomaly, Electrocardiogram normal, Antiphospholipid antibodies, Plasmodium falciparum infection, Deafness congenital

**Cluster No. 72 (Linkage Score: 4)**

**Number of Nodes (details below): 5 - Number of Edges: 20**

Congenital pneumonia, Foreign body aspiration, Neurogenic bladder, CSF protein abnormal, Cephalin flocculation

S379

**Cluster No. 73 (Linkage Score: 4)**

**Number of Nodes (details below): 5 - Number of Edges: 20**

Lens disorder, Renal vasculitis, Lipids increased, Blood zinc decreased, Retinal oedema

S380

**Cluster No. 74 (Linkage Score: 4)**

**Number of Nodes (details below): 5 - Number of Edges: 20**

Injection site discolouration, Vaginal cyst, Nipple exudate bloody, Feminisation acquired, Very low density lipoprotein decreased

S381

**Cluster No. 75 (Linkage Score: 4)**

**Number of Nodes (details below): 5 - Number of Edges: 20**

Hepatic vein occlusion, Oropharyngeal spasm, Dysaesthesia pharynx, Loss of proprioception, Lhermitte's sign

S382

**Cluster No. 76 (Linkage Score: 4)**

**Number of Nodes (details below): 5 - Number of Edges: 20**

Acute sinusitis, Diabetic vascular disorder, Diabetic neuropathy, Urea urine increased, Salpingo-oophoritis

S383

**Cluster No. 77 (Linkage Score: 4)**

**Number of Nodes (details below): 5 - Number of Edges: 20**

Tooth infection, Urethral syndrome, Nasopharyngeal cancer, Cholesteatoma, Brain neoplasm malignant

S384

**Cluster No. 78 (Linkage Score: 4)**

**Number of Nodes (details below): 5 - Number of Edges: 20**

Copper deficiency, Goodpasture's syndrome, Sjogren's syndrome, Collagen disorder, Hypozincaemia



S385

**Cluster No. 79 (Linkage Score: 3.6)**

**Number of Nodes (details below): 5 - Number of Edges: 18**

Cycloplegia, Retrograde amnesia, Incoherent, Pupil fixed, Angle closure glaucoma

S386

**Cluster No. 80 (Linkage Score: 3.6)**

**Number of Nodes (details below): 5 - Number of Edges: 18**

Tongue geographic, Mucocutaneous rash, Tooth loss, Tooth deposit, Salivary gland calculus

S387

**Cluster No. 81 (Linkage Score: 3.6)**

**Number of Nodes (details below): 5 - Number of Edges: 18**

Drug withdrawal syndrome neonatal, Motor dysfunction, Phobia of driving, Antisocial behaviour, Clumsiness

S388

**Cluster No. 82 (Linkage Score: 3.6)**

**Number of Nodes (details below): 5 - Number of Edges: 18**

Prostatic specific antigen increased, Adrenal neoplasm, Very low density lipoprotein increased, Total cholesterol/HDL ratio decreased, Blood viscosity increased

S389

**Cluster No. 83 (Linkage Score: 3.6)**

**Number of Nodes (details below): 5 - Number of Edges: 18**

Osteosclerosis, Eczema asteatotic, Lipomatosis, Urinary sediment abnormal, Ultrasound kidney abnormal

S390

**Cluster No. 84 (Linkage Score: 3.333)**

**Number of Nodes (details below): 6 - Number of Edges: 20**

Adrenal disorder, Trigeminal nerve disorder, Nasal mucosal disorder, Transaminases decreased, Glucocorticoids decreased, Bone density increased

## **Cluster No. 125 (Linkage Score: 2.933)**

### **Number of Nodes (details below): 15 - Number of Edges: 44**

Conjunctival scar, Ill-colored lip, Ill-coloured lip, Diseases of lips, Bumps lip, Lip disorder NOS, Intraocular pressure abnormal, Other scleral disorders, Myelopathy, Other disorders of sclera, Infusion site infection, Intraocular pressure abnormal NOS, Scleral disorder, Intraocular pressure test abnormal, Scleral disorder NOS

## Cluster No. 126 (Linkage Score: 2.778)

### Number of Nodes (details below): 18 - Number of Edges: 50

Gastrointestinal motility disorder, Bronchocentric granulomatosis, Pulmonary granulomatosis, Pulmonary granuloma NOS, Stenosis urinary bladder, Bladder constriction, Bile duct pressure increased, Stenosis bladder, ACTH dec, Corticotrophin decreased, Corticotropin low, Adrenocorticotropin decreased, ACTH decreased, Serum corticotrophin decreased, Blood thyroid stimulating hormone decreased, Plasma corticotrophin decreased, Ureteral spasm, Corticotropin decreased



S393

## Cluster No. 127 (Linkage Score: 2.7)

**Number of Nodes (details below): 10 - Number of Edges: 27**

Jarisch-Herxheimer reaction, Relapsing fever, unspecified, Unspecified relapsing fever, Tick-borne relapsing fever, Louse-borne relapsing fever, Relapsing fever, tick-borne, Relapsing fever, louse-borne, *Borrelia recurrentis* infection, Colonic atony, Haemorrhagic disorder

S394

## **Cluster No. 135 (Linkage Score: 2.286)**

### **Number of Nodes (details below): 14 - Number of Edges: 32**

Congenital endocrine anomaly, Thrombin time prolonged, Adrenal cortex atrophy, Clitorimegaly, Epiphyses premature fusion, Clitoris enlarged, Testicular failure, Hypertrophy of clitoris, Male pattern baldness, Enlargement clitoris, Blood gonadotrophin increased, Virilism congenital, Genitourinary tract neoplasm, Virilism fetal

## Cluster No. 136 (Linkage Score: 2)

### Number of Nodes (details below): 20 - Number of Edges: 40

Skin hypopigmentation, Crepy skin, Skin atrophy senile, Skin thinness, Loss of skin elasticity, Skin thinning of, Senile skin atrophy, Hypomelanoses, Hypopigmentation of eyelid, Striae distensae, Striae atrophicae, Striae atrophic, Striae skin, Extensive striae, Stretch marks, Striae purple, Striae, Skin atrophy, Atrophy skin, Skin striae

**Cluster No. 137 (Linkage Score: 2)**

**Number of Nodes (details below): 5 - Number of Edges: 10**

Cushing's syndrome, Cushings syndrome, Heat rash, Syndrome Cushing's, Skin maceration

## Cluster No. 142 (Linkage Score: 2)

### Number of Nodes (details below): 8 - Number of Edges: 16

Extrapyramidal disorder, NMS, Neuroleptic malignant syndrome aggravated, Malignant syndrome NOS, Neuroleptic malignant synd. aggr., Neuroleptic malignant, Akathisia, Neuroleptic malignant syndrome

## Cluster No. 187 (Linkage Score: 1.889)

### Number of Nodes (details below): 18 - Number of Edges: 34

Megaloblasts increased, Hypersensitivity injection site, Post phlebitic syndrome, Postphlebitic syndrome, Lipodermatosclerosis, Allergic edema, Allergic oedema NOS, Leukemia cutis, Pneumonia due to Klebsiella pneumoniae, Friedlander's pneumonia, Klebsiella pneumoniae pneumonia, Klebsiellal pneumonia, Klebsiella pneumonia, Blastomycosis recurrent, Lobomycosis, Blastomyces dermatitidis infection, Ephelides, Blastomycotic infection

## Cluster No. 188 (Linkage Score: 1.857)

### Number of Nodes (details below): 14 - Number of Edges: 26

Pancreatic enzymes decreased, TSH dec, Thyroid stimulating hormone decreased, Thyrotropin low, Thyrotropin decreased, Thyrotrophin decreased, Thyroid stim. hormone decreased, TSH decreased, Serum thyroid stimulating hormone decreased, Plasma thyroid stimulating hormone decreased, TSH decrease, Respiratory rate decreased, Decreased TSH, Bile output decreased

S400

## Cluster No. 189 (Linkage Score: 1.8)

### Number of Nodes (details below): 10 - Number of Edges: 18

Nasal septum disorder, Miliaria pustulosa, Miliaria profunda, Miliaria crystallina, Sweat rash, Prickly heat, Miliaria, Miliaria rubra, General symptom, Oropharyngeal candidiasis



S401

**Cluster No. 190 (Linkage Score: 1.75)**

**Number of Nodes (details below): 8 - Number of Edges: 14**

Moniliasis pulmonary, Candidiasis of trachea, Candidiasis of bronchi, Candidiasis of lung, Candidiasis respiratory, Intertrigo, Moniliasis respiratory system, Melanocytic naevus

S402

**Cluster No. 191 (Linkage Score: 1.6)**

**Number of Nodes (details below): 5 - Number of Edges: 8**

Bloody drainage, Reaction nonspecific, Atrophic vulvovaginitis, Serosanguineous drainage, Perianal erythema
